# Supplementary material for: Noradrenergic axon loss drives olfactory dysfunction in Alzheimer’s disease
Source: Research Square preprint supplement (doi:10.21203/rs.3.rs-4887136/v1), 2024-10-02
Supplement: Supplementary file 1 [file 03f90039c05a43c2fbf851ad.xlsx]

## Sheet: SupplementaryTable 2_Statictics
Supplementary Table 2: Statistics for data in extended data figures 1-10
Figure	Test	Groups to compare	Animal per group	Slices or cells	p value	F value	DF	t value
1b	unpaired, two-tailed t-test	6 month C57BL/6J vs. APPNL-G-F (Pir)	4 vs. 4	2-3	0.8609	1113	6	0.1829
		6 month C57BL/6J vs. APPNL-G-F (mPFC)	4 vs. 5	2	0.1187	4494	6	1778
		6 month C57BL/6J vs. APPNL-G-F (DG)	4 vs. 4	3	0.6625	1410	6	0.4588
		6 month C57BL/6J vs. APPNL-G-F (S1)	5 vs. 6	3	0.0028	3073	6	4512
2a	Correlation Pearson r	3 month NET vs. Aβ	6	4	0.3747
		6 month NET vs. Aβ	8	4	0.0335
3a	unpaired, two-tailed t-test	3 month C57BL/6J vs. APPNL-G-F	6 vs. 6		0.4313	2412	10	0.8200
5c	unpaired, two-tailed t-test	6 month APPNL-G-F (control) vs APPNL-G-F (h3MDGs)	6 vs. 4		0.8381	1091	8	0.2111
8b	unpaired, two-tailed t-test	3 month C57BL/6J vs. APPNL-G-F	2 vs. 2	5	0.3844		2	1.105
10b	unpaired, two-tailed t-test	3 month C57BL/6J vs. APPNL-G-F	5 vs. 4	3	0.2525	1447	8	1247
