# Supplementary material for: Noradrenergic axon loss drives olfactory dysfunction in Alzheimer’s disease
Source: Research Square preprint supplement (doi:10.21203/rs.3.rs-4887136/v1), 2024-10-02
Supplement: Supplementary file 2 [file 615c13f6b50d7750dc66a90d.xlsx]

## Sheet: SupplementaryTable 1_Statistics
Supplementary Table 1: Statistics for data in main figures 1-6
Figure	Test	Groups to compare	Animal per group	Slices or cells	p value	F value	DF	t value
1c	unpaired, two-tailed t-test	1 month C57BL/6J vs. APPNL-G-F	4 vs. 5	4	0.2704	4424	7	1197
		2 month C57BL/6J vs. APPNL-G-F	5 vs. 4	4	0.0048	2473	7	4067
		3 month C57BL/6J vs. APPNL-G-F	6 vs. 6	4	<0.0001	1038	10	7323
		6 month C57BL/6J vs. APPNL-G-F	7 vs. 8	4	0.0001	2095	13	5363
1d	unpaired, two-tailed t-test	GL: C57BL/6J vs. APPNL-G-F	5 vs. 6	4	0.1771	2887	9	1464
		EPL: C57BL/6J vs. APPNL-G-F	5 vs. 6	4	0.0366	1313	9	2452
		IPL/MCL: C57BL/6J vs. APPNL-G-F	5 vs. 6	4	0.0031	4778	9	4007
		GCL: C57BL/6J vs. APPNL-G-F	5 vs. 6	4	0.3472	1053	9	0.9919
1f	unpaired, two-tailed t-test	1 month C57BL/6J vs. APPNL-G-F	5 vs. 5	4	0.1327	1120	8	1674
		2 month C57BL/6J vs. APPNL-G-F	5 vs. 4	4	0.0111	6435	7	3431
		3 month C57BL/6J vs. APPNL-G-F	6 vs. 6	4	<0.0001	1026	10	7437
		6 month C57BL/6J vs. APPNL-G-F	7 vs. 8	4	<0.0001	3055	13	7780
1g	one-way ANOVA, Sidak's post-hoc	Overall ANOVA			<0.0001	86.85	18
		1 month vs. 2 month APPNL-G-F	4 vs. 4	4	0.9993			0.1151
		2 month vs. 3 month APPNL-G-F	4 vs. 6	4	0.3840			1507
		3 month vs. 6 month APPNL-G-F	6 vs. 8	4	<0.0001			12.08
1i	unpaired, two-tailed t-test	12 month C57BL/6J vs. APPNL-G-F	3 vs. 3	8	0.9898	2474	4	0.01364
1k	unpaired, two-tailed t-test	1 month C57BL/6J vs. APPNL-G-F	9 vs. 10		0.5953	4466	17	0.5414
		3 month C57BL/6J vs. APPNL-G-F	14 vs. 18		0.0058	2288	30	2971
		6 month C57BL/6J vs. APPNL-G-F	14 vs. 24		0.0042	10.72	36	3053
1m	two-way ANOVA, Tukey's post-hoc	Overall ANOVA			0.0392	4592	35
		low: C57BL/6J vs APPNL-G-F	10 vs. 11		0.8595		19
		high: C57BL/6J vs APPNL-G-F	9 vs. 10		0.0059		17
		low C57BL/6J vs high C57BL/6J	10 vs. 10		0.0380		18
		low APPNL-G-F vs high APPNL-G-F	11 vs. 9		0.9994		18
1n	two-way ANOVA, Sidak's post-hoc	Overall ANOVA			0.5671	0.3344	32
		low: C57BL/6J vs APPNL-G-F	9 vs. 9		0.5561			0.9814
		high: C57BL/6J vs APPNL-G-F	9 vs. 9		0.0392			2454
2f	unpaired, two-tailed t-test	3 month C57BL/6J vs. APPNL-G-F	3 vs. 3		<0.0001	3865	4	16.79
2g	unpaired, two-tailed t-test	3 month C57BL/6J vs APPNL-G-F (time frame: 80-100s)	3 vs. 3		0.0084	26.50	4	4847
2i	unpaired, one-tailed t-test	3 month C57BL/6J vs. APPNL-G-F	3 vs. 3	3	0.0363	1322	4	2423
3b	unpaired, two-tailed t-test	2 month C57BL/6J vs. APPNL-G-F	8 vs. 8		0.0065	2018	14	3190
3i	one-way ANOVA, Tukey's post-hoc	Overall ANOVA			<0.0001	314.4	12
		C57BL/6J + Syn. vs. APPNL-G-F + Syn.	4 vs. 4	3	0.0001
		C57BL/6J + Syn. vs. C57BL/6J + Syn + CytoD	4 vs. 4	3	<0.0001
		APPNL-G-F + Syn vs. APPNL-G-F + Syn + CytoD	4 vs. 4	3	<0.0001
		C57BL/6J + Syn + CytoD vs. APPNL-G-F + Syn + CytoD	4 vs. 4	3	0.9996
3k	unpaired, two-tailed t-test	NET C57BL/6J vs. APPNL-G-F	3 vs. 3	5	0.0222	10.24	4	3627
		Iba1 C57BL/6J vs. APPNL-G-F	3 vs. 3	5	0.3088	1.513	4	1165
		CD68 in Iba1 C57BL/6J vs. APPNL-G-F	3 vs. 3	5	0.0302	6862	4	3290
		NET in Iba1 C57BL/6J vs. APPNL-G-F	3 vs. 3	5	0.0198	67.00	4	3759
4b	unpaired, two-tailed t-test	2 month C57BL/6J vs. APPNL-G-F	4 vs. 4	3-4	0.9995	7.244	6	0.0006962
		3 month C57BL/6J vs. APPNL-G-F	6 vs. 5	3-4	0.0074	2.249	9	3.439
		6 month C57BL/6J vs. APPNL-G-F	8 vs. 5	3-4	0.0004	2.429	11	4.947
4c	one-way ANOVA, Tukey's host-hoc	Overall ANOVA			0.0050	6.095	39
		3 month C57BL/6J vs. APPNL-G-F	14 vs. 18		0.0079
		3 month APPNL-G-F vs. APPNL-G-FxTSPO-KO	18 vs. 10		0.9566
		3 month C57BL/6J vs. APPNL-G-FxTSPO-KO	14 vs. 10		0.0361
4e	unpaired, two-tailed t-test	Iba1 C57BL/6J vs. APPNL-G-F	3 vs. 3	5	0.2431	1.403	4	1.368
		CD68 in Iba1 C57BL/6J vs. APPNL-G-F	3 vs. 3	5	0.4751	5.245	4	0.7874
		NET in Iba1 C57BL/6J vs. APPNL-G-F	3 vs. 3	5	0.0437	67.00	4	2.910
4g	unpaired, two-tailed t-test	6 month C57BL/6J vs. APPNL-G-F	3 vs. 3	6	0.0425	1.666	4	2.937
4i	one-way ANOVA, Tukey's host-hoc	Overall ANOVA			0.5363	0.6925	6
		6 month C57BL/6J vs. APPNL-G-F	3 vs. 3	6	0.7333
		6 month C57BL/6J vs. APPNL-G-F x TSPO-KO	3 vs. 3	6	0.5185
		6 month APPNL-G-F vs. APPNL-G-F x TSPO-KO	3 vs. 3	6	0.9225
4k	one-way ANOVA, Tukey's host-hoc	Overall ANOVA			0.0010	16.49	9
		6 month C57BL/6J vs. APPNL-G-F	4 vs. 4	6	0.0242
		6 month C57BL/6J vs. APPNL-G-F x TSPO-KO	4 vs. 4	6	0.0007
		6 month APPNL-G-F vs. APPNL-G-F x TSPO-KO	4 vs. 4	6	0.0828
4n	unpaired, two-tailed t-test	6 month C57BL/6J vs. APPNL-G-F	8 vs. 10	12 vs. 13	0.0045	5.724	23	3.152
4o	unpaired, two-tailed t-test	6 month C57BL/6J vs. APPNL-G-F	8 vs. 9	10 vs. 9	0.1076	2.092	17	1.699
4q	two-way ANOVA, Sidak's post hoc	Overall ANOVA			<0.0001	29.55	132
		6 month C57BL/6J vs. APPNL-G-F	8 vs. 9	12 vs. 11
5c	unpaired, two-tailed t-test	5 month Dbh-EYFP vs. Dbh-hAPPNL-G-F	5 vs. 5	3	0.0024	5.052	8	4.353
5d	unpaired, two-tailed t-test	5 month Dbh-EYFP vs. Dbh-hAPPNL-G-F	5 vs. 5		<0.0001	1.596	8	7.318
5e	Correlation Pearson r	5 month Dbh-EYFP vs. Dbh-hAPPNL-G-F	5 vs. 5		0.0121
5g	unpaired, two-tailed t-test	5 month NET C57BL/6J vs. APPNL-G-F	3 vs. 3	5	0.0054	8848	4	5.470
		5 month NET in Iba1 C57BL/6J vs. APPNL-G-F	3 vs. 3	5	0.0067	1.714	4	5.166
6b	one-way ANOVA, Tukey's post-hoc	Overall ANOVA			<0.0001	26.50	77
		HC vs. pAD (single pictues)	28 vs. 28	4	<0.0001
		pAD vs. AD (single pictues)	28 vs. 24	4	<0.0001
		HC vs. AD (single pictues)	28 vs. 24	4	0.8771
6c	one-way ANOVA, Tukey's post-hoc	Overall ANOVA			0.0010	10.55	17
		HC vs. pAD (subjects)	7 vs. 7	4	0.0033
		pAD vs. AD (subjects)	7 vs. 6	4	0.0024
		HC vs. AD (subjects)	7 vs. 6	4	0.9488
6e	one-way ANOVA, Tukey's post-hoc	Overall ANOVA			0.0014	7.616	44
		HC vs. pAD (subjects)	14 vs. 17		0.0221
		pAD vs. AD (subjects)	17 vs. 16		0.0012
		HC vs. AD (subjects)	14 vs. 16		0.4946
6f	one-way ANOVA, Tukey's post-hoc	Overall ANOVA			0.0069	5.660	39
		HC vs. pAD (subjects)	14 vs. 12		0.8479
		pAD vs. AD (subjects)	12 vs. 16		0.0085
		HC vs. AD (subjects)	14 vs. 16		0.0476
6h	Nonlin fit	2-12 month C57BL/6J vs. APPNL-G-F	66 vs. 55				119
6i	unpaired, two-tailed t-test	2-3 month C57BL/6J vs. APPNL-G-F	16 vs. 11		0.0169	1343	25	2560
6j	unpaired, two-tailed t-test	2-3 month C57BL/6J vs. APPNL-G-F	16 vs. 11		0.9374	3576	25	0.07927
