# Supplementary material for: Noradrenergic axon loss drives olfactory dysfunction in Alzheimer’s disease
Source: Research Square preprint supplement (doi:10.21203/rs.3.rs-4887136/v1), 2024-10-02
Supplement: Supplementary file 3 [file 7fea4e108b24a52722c00232.xlsx]

## Sheet: Fig. 6a-c
Demographic details of subjects donating brain tissue (Fig.6a-c)
Patient	Age (Years)	Sex	Thal-Phase	Braak stage	Diagnosis	Neurophathological diagnosis
1	60	F	0	1	Healthy Control	No significant abnormalities
2	63	F	0	1	Healthy Control	No significant abnormalities
3	81	F	0	1	Healthy Control	No significant abnormalities
4	64	F	0	1	Healthy Control	Arteriosclerosis, mild SVD, Leptomeninx neocortical
5	82	M	0	2	Healthy Control	No significant abnormalities, Arteriosclerosis
6	62	M	0	1	Healthy Control	Arteriosclerosis
7	65	M	0	1	Healthy Control	Anlagevariante left frontal cortex
8	81	F	2	1	Pre-AD	Protein accumulation, mild AD
9	73	M	2	1	Pre-AD	Protein accumulation, mild AD
10	84	M	1	3	Pre-AD	Protein accumulation, mild AD, ARTAG
11	86	M	2	3	Pre-AD	Protein accumulation, mild AD, Loivo-ponto-cerebellar dysplasy
12	67	M	3	1	Pre-AD	Protein accumulation, mild AD, Infarction, Ischemic
13	64		0	1	Pre-AD	Protein accumulation, mild AD, Arteriosclerosis
14	87	/	2	3	Pre-AD	Protein accumulation, mild AD, Argyrophillic grain disease
15	88	/	5	4	AD	AD, Meningeom
16	78	M	4	4	AD	AD, CAA, Arteriosclerosis
17	73	F	5	2	AD	AD, AgD, Arteriosclerosis
18	90	F	4	3	AD	AD, Loss of myelin in spinal tract
19	90	/	4	3	AD	AD, AgD, CAA, Hippocampal sclerosis, Haemmorrage subdural
20	75	/	5	4	AD	AD, CAA

## Sheet: Fig. 6d-f
Demographic details of subjects participating in TSPO-PET and olfaction study (Fig.6d-f)
Patient Control	Cognitive diagnosis	Sex	Age (Years)	TSPO SUVr in OB	Olfaction: correct sticks (%)	β-Amyloid (1-42)	β-Amyloid (1-40)	β-Amyloid-Ratio	Tau-Protein	Tau/β-Amyloid	p-Tau
1	Healthy Control	M	79.6521	0.9003	41.67	402.57	8033	5	181.61	1052	57.28
2	Healthy Control	F	74.8521	0.9232	83.33	765.64	11560	6.6	200.62	711.09	40.74
3	Healthy Control	F	72.5945	0.9367	91.67	639.24	9934	6.4	193.27	828.82	39.87
4	Healthy Control	F	69.0986	0.8896	91.67	1590	19188	8.3	221.97	10	56.17
5	Healthy Control	F	70.4055	0.9457	75	1073	17821	6	616.13	894.48	82.02
6	Healthy Control	F	55.7726	0.9429	83.33	/	/	/	/	/	/
7	Healthy Control	F	57.1808	0.8431	91.67	881.77	13657	6.5	144.33	528.54	40.65
8	Healthy Control	F	80.7753	0.9997	83.33	2509	25470	9.8	501.74	10	77.18
9	Healthy Control	M	69.7425	0.9224	91.67	1730	25481	6.8	342.11	10	76
10	Healthy Control	M	79.8904	0.9127	91.67	1460.8	5296	2.8	240.61	1378	43.09
11	Healthy Control	M	72.211	0.943	91.67	580.19	9442	6.1	241.07	944.27	58.78
12	Healthy Control	M	71.2548	0.8087	75	1009	13877	7.3	300.69	585.71	46.42
13	Healthy Control	M	67.3096	0.9738	100	1475	18029	8.2	441.08	253.45	71.91
14	Healthy Control	M	76.874	1.0156	58.33	423.51	5656	7.5	146.32	989.15	37.6
Mean			71.2581	0.925529	82.1436	1118.44	14111.1	6.71538	290.119	630.424	55.9777
Patient prodromal AD	Cognitive diagnosis	Sex	Age (Years)	TSPO SUVr in OB	Olfaction: correct sticks (%)	β-Amyloid (1-42)	β-Amyloid (1-40)	β-Amyloid-Ratio	Tau-Protein	Tau/β-Amyloid	p-Tau
1	MCI	F	74.6438	1.0929	91.67	519.5	13160	4	311.57	1088	64.46
2	MCI	F	66.1233	1.0134	25	636.09	13817	4.6	548.7	1251	73.05
3	MCI	F	74.0658	1.0384	83.33	468.13	15872	3	510.61	1374	77.76
4	MCI	F	58.5808	0.9251	75	463.72	13215	3.5	741.81	1652	118.09
5	SCD	M	72.0685	1.0149	100	/	/	/	/	/	/
6	SCD	F	69.011	1.0072	91.67	684.15	13523	5.1	458.99	1097	80.1
7	SCD	M	60.3041	0.9104	75	567.56	16535	3.4	541.94	1312	75.03
8	MCI	M	81	1.06972	50	211.21	8881	2.4	398.56	1499	85.17
9	MCI	F	74	0.972	83.33	468.13	15872	3	510.61	1374	77.76
10	MCI	M	67	1.01668	/	635.13	30578	2.1	3515	4753	282.05
11	MCI	F	54	1.01365	/	502.03	13274	3.8	600.08	1446	93.82
12	MCI	M	63	0.958391	91.67	510.68	7835	6.5	179.65	941.31	40.37
13	MCI	F	59	0.925113	75	463.72	13215	3.5	741.81	1652	118.09
14	MCI	M	70	0.900053	/	374.83	5812	6.5	104.2	988.13	29.1
15	SCD	M	67	0.893273	100	/	/	/	/	/	/
16	SCD	M	72	1.06438	/	746.41	13970	5.3	289.62	835.34	50.52
17	SCD	M	76	0.914177	/	/	/	/	/	/	/
Mean			68.1057	0.984102	78.4725	517.949	13968.5	4.05	675.225	1518.77	90.3836
Patient AD	Cognitive diagnosis	Sex	Age (Years)	TSPO SUVr in OB	Olfaction: correct sticks (%)	β-Amyloid (1-42)	β-Amyloid (1-40)	β-Amyloid-Ratio	Tau-Protein	Tau/β-Amyloid	p-Tau
1	AD-CBS	M	80.6986	1.0697	50	569.99	12343	4.6	310.12	1036	67.92
2	AD-CBS	M	78.0795	1.0754	83.33	338.65	7027	4.8	103.84	1024	35.23
3	AD-CBS	F	67.2384	1.0669	58.33	798.63	17010	4.7	440.96	961.7	72.27
4	AD-CBS	F	82.3014	1.0213	58.33	/	/	/	/	/	/
5	AD-CBS	F	81.4082	1.0599	58.33	395.64	7284	5.4	150.92	1022	39.3
6	AD	F	77.9315	0.9502	75	/	/	/	/	/	/
7	AD	F	74.5233	1.0958	66.67	/	/	/	/	/	/
8	AD	F	80.0027	1.01	58.33	750.94	32130	2.3	1045	1723	135.02
9	AD	F	59.2164	1.0019	91.67	504.66	12316	4.1	693.66	1554	106.4
10	AD	F	78.5096	0.9984	75	535.4	13082	4.1	396.23	1172	83.58
11	AD	F	64.7315	0.9975	50	/	/	/	420.51
12	AD	F	63.1342	0.9911	66.67	427.6	9856	4.3	356.74	1233	77.09
13	AD	F	72.6959	0.9874	66.67	571.25	11660	4.9	558.84	1328	97.75
14	AD	F	73.9151	0.947	58.33	790.18	16974	4.7	629.08	1192	113.66
15	AD	M	81.3534	0.9454	41.67	235.62	7557	3.1	371.88	1443	74.21
16	AD	F	66.0767	0.901	41.67	330.3	10271	3.2	711.87	1750	97.87
Mean			73.8635	1.00743	62.5	520.738	13125.8	4.18333	476.127	1286.56	83.3583
