# Supplementary material for: Noradrenergic axon loss drives olfactory dysfunction in Alzheimer’s disease
Source: Research Square preprint supplement (doi:10.21203/rs.3.rs-4887136/v1), 2024-10-02
Supplement: Supplementary file 4 [file 9b7d474e050309069d9a7371.xlsx]

## Sheet: Extended Data Table 1a
Extended Data Table 1a
gene_symbol	logFC	FDR	PValue	logCPM	seqnames	start	end	width	strand	gene_id	gene_type	comparison	significant
Dop1b	-1.85078e+16	209000000	11700	5573496152284910	chr16	93508792	93607478	98687	+	ENSMUSG00000022946.11	protein_coding	KI.vs.WT	yes
Cdr1os	1949035890496040	1130000000	127000	7582948364274030	chrX	60159984	60247391	87408	+	ENSMUSG00000071753.14	lncRNA	KI.vs.WT	yes
Mid1	375639043833604	14100000000	237000	4.6367e+16	chrX	168468195	168788732	320538	+	ENSMUSG00000035299.17	protein_coding	KI.vs.WT	yes
Mid1-ps1	766338897130968	263000000000	67900000	-0.446481126154028	chrY	90764326	90774754	10429	+	ENSMUSG00000095134.3	unprocessed_pseudogene	KI.vs.WT	yes
Zfp248	3.66427e+16	263000000000	73600000	2.84857e+16	chr6	118404280	118432489	28210	-	ENSMUSG00000030145.15	protein_coding	KI.vs.WT	yes
Gm9887	-2.69006e+16	36800000000	12400000	2002851599835430	chr12	69417258	69419242	1985	-	ENSMUSG00000052673.3	lncRNA	KI.vs.WT	yes
ENSMUSG00000121252	-3.20227e+16	61400000000	26000000	1.93568e+16	chr11	49092701	49094009	1309	-	ENSMUSG00000121252.1	lncRNA	KI.vs.WT	yes
Arf6	-1.76345e+16	61400000000	30400000	5669385774799040	chr12	69418924	69420557	1634	+	ENSMUSG00000044147.9	protein_coding	KI.vs.WT	yes
Herpud1	-1.98005e+16	61400000000	3100000	7325297849377720	chr8	95113066	95122005	8940	+	ENSMUSG00000031770.17	protein_coding	KI.vs.WT	yes
Gm29170	-2.41914e+16	70700000000	39600000	2856864939162220	chr1	143653380	143657045	3666	+	ENSMUSG00000100455.2	lncRNA	KI.vs.WT	yes
Gm23287	-3992385827256480	92100000000	608000	0.6519362231064094	chr4	117068041	117068156	116	+	ENSMUSG00000119459.1	snRNA	KI.vs.WT	yes
Rbm39	-0.7802559709957052	92100000000	6200000	84975940751352	chr2	155989159	156022158	33000	-	ENSMUSG00000027620.17	protein_coding	KI.vs.WT	yes
Gm10138	-1777325485480790	1000000000000	73200000	4338382649673800	chr1	151174226	151220982	46757	-	ENSMUSG00000100954.7	lncRNA	KI.vs.WT	yes
Srsf6	-0.8647183423699805	1100000000000	86000000	6781075254088410	chr2	162773448	162779041	5594	+	ENSMUSG00000016921.15	protein_coding	KI.vs.WT	yes
ENSMUSG00000120715	-3169716065893140	136000000000	1260000000	2.47514e+16	chr12	86870424	86871722	1299	-	ENSMUSG00000120715.1	lncRNA	KI.vs.WT	yes
4930404I05Rik	-2.67858e+16	136000000000	142000000	3.1728e+16	chr16	90808132	90813631	5500	+	ENSMUSG00000087354.3	lncRNA	KI.vs.WT	yes
Gm44187	-2428473476967120	136000000000	14200000	2.92545e+16	chr6	88017521	88019449	1929	-	ENSMUSG00000108268.2	TEC	KI.vs.WT	yes
Snord118	-2.00723e+16	136000000000	1500000000	3.27391e+16	chr11	68964253	68964387	135	+	ENSMUSG00000064899.3	snoRNA	KI.vs.WT	yes
G530011O06Rik	3.08706e+16	136000000000	1640000000	596318580641629	chrX	168758039	168761913	3875	-	ENSMUSG00000072844.7	lncRNA	KI.vs.WT	yes
Gm9725	-3234587384704180	136000000000	1750000000	4566393907601650	chr8	81740205	81787824	47620	+	ENSMUSG00000037982.18	lncRNA	KI.vs.WT	yes
Gm20703	-2.48508e+16	136000000000	177000000	2759011316750680	chr17	71141571	71143189	1619	+	ENSMUSG00000093622.3	lncRNA	KI.vs.WT	yes
2310010J17Rik	-2.97356e+16	136000000000	1820000000	3296104668545100	chr7	89773381	89779246	5866	-	ENSMUSG00000097162.4	lncRNA	KI.vs.WT	yes
4933406P04Rik	-3336685294691910	136000000000	1840000000	2.42522e+16	chr10	20186247	20188073	1827	-	ENSMUSG00000069713.4	lncRNA	KI.vs.WT	yes
Gm9484	-2.6045e+16	136000000000	1920000000	3.92654e+16	chr5	97144065	97145223	1159	-	ENSMUSG00000105006.2	lncRNA	KI.vs.WT	yes
Mir142hg	-2532568277783150	136000000000	193000000	5877078915932350	chr11	87646399	87648102	1704	+	ENSMUSG00000084796.3	lncRNA	KI.vs.WT	yes
ENSMUSG00000120387	-2749316879449260	136000000000	2000000000	1.85102e+16	chr12	80160546	80162528	1983	-	ENSMUSG00000120387.1	lncRNA	KI.vs.WT	yes
ENSMUSG00000120559	-4062933485665450	136000000000	2060000000	2139076528862480	chr11	87638359	87639664	1306	-	ENSMUSG00000120559.1	lncRNA	KI.vs.WT	yes
ENSMUSG00000120690	-3.36063e+16	1440000000000	2260000000	0.7389668888525656	chr19	5073126	5074010	885	-	ENSMUSG00000120690.1	lncRNA	KI.vs.WT	yes
5031425E22Rik	-1.92068e+16	1570000000000	255000000	4942090245649860	chr5	23587297	23639396	52100	-	ENSMUSG00000073147.5	lncRNA	KI.vs.WT	yes
Txnip	-0.899958448640151	1690000000000	285000000	9151345509782550	chr3	96465273	96469199	3927	+	ENSMUSG00000038393.15	protein_coding	KI.vs.WT	yes
Brd2	-0.9326955867442182	1780000000000	3090000000	8210743407863890	chr17	34330997	34341608	10612	-	ENSMUSG00000024335.21	protein_coding	KI.vs.WT	yes
ENSMUSG00000120190	-3.3316e+16	197000000000	3620000000	2.38127e+16	chr11	75351275	75351972	698	-	ENSMUSG00000120190.1	lncRNA	KI.vs.WT	yes
Ier2	-2.55823e+16	197000000000	3810000000	752209770479009	chr8	85387960	85389483	1524	-	ENSMUSG00000053560.6	protein_coding	KI.vs.WT	yes
Gm45793	5918388138083900	197000000000	383000000	0.3060454875265146	chr7	89476426	89477767	1342	+	ENSMUSG00000109150.2	TEC	KI.vs.WT	yes
Eif5	-1.0564e+16	197000000000	3860000000	7772582505965100	chr12	111504450	111513186	8737	+	ENSMUSG00000021282.18	protein_coding	KI.vs.WT	yes
ENSMUSG00000120631	-2144452757985750	1990000000000	402000000	3.63514e+16	chr4	135604253	135604770	518	+	ENSMUSG00000120631.1	lncRNA	KI.vs.WT	yes
Per1	-1.78307e+16	2020000000000	4200000000	7218537876327070	chr11	68986043	69000786	14744	+	ENSMUSG00000020893.18	protein_coding	KI.vs.WT	yes
Gm16174	-3691018094571990	2150000000000	459000000	1076468125432280	chr7	19550478	19552550	2073	+	ENSMUSG00000087593.2	lncRNA	KI.vs.WT	yes
Atf4	-138277175872165	2160000000000	473000000	724810539564926	chr15	80139385	80141742	2358	+	ENSMUSG00000042406.9	protein_coding	KI.vs.WT	yes
Pcna	-1.37833e+16	2160000000000	485000000	595167885678061	chr2	132091082	132095234	4153	-	ENSMUSG00000027342.15	protein_coding	KI.vs.WT	yes
B930036N10Rik	-2.82396e+16	2160000000000	496000000	3.88679e+16	chr1	171328136	171331679	3544	-	ENSMUSG00000091993.3	lncRNA	KI.vs.WT	yes
ENSMUSG00000120101	-2.38135e+16	2160000000000	508000000	3.80863e+16	chr8	127321430	127322648	1219	+	ENSMUSG00000120101.1	lncRNA	KI.vs.WT	yes
ENSMUSG00000120260	-3.01482e+16	2260000000000	549000000	2.12589e+16	chr17	29707882	29709334	1453	-	ENSMUSG00000120260.1	lncRNA	KI.vs.WT	yes
Gm38140	-3.16144e+16	2260000000000	565000000	4357482653158030	chr1	134024143	134026897	2755	-	ENSMUSG00000102380.2	TEC	KI.vs.WT	yes
Neat1	-2.49507e+16	2260000000000	589000000	6698043044735450	chr19	5874736	5895898	21163	-	ENSMUSG00000092274.5	lncRNA	KI.vs.WT	yes
Btg2	-2.85286e+16	2260000000000	590000000	9162360915911070	chr1	134002908	134006858	3951	-	ENSMUSG00000020423.7	protein_coding	KI.vs.WT	yes
H3c1	-2.87953e+16	2260000000000	603000000	2.6687e+16	chr13	23945836	23946369	534	-	ENSMUSG00000069265.3	protein_coding	KI.vs.WT	yes
4833445I07Rik	-2566918763211310	2260000000000	60800000	3.42655e+16	chr9	108444667	108446855	2189	+	ENSMUSG00000103103.3	lncRNA	KI.vs.WT	yes
4933440N22Rik	-2737583109160010	243000000000	66800000	2321420259444510	chr6	117882769	117884721	1953	-	ENSMUSG00000042087.6	TEC	KI.vs.WT	yes
ENSMUSG00000120144	-1.44305e+16	300000000000	841000000	4835779666046980	chr12	69421378	69422754	1377	+	ENSMUSG00000120144.1	lncRNA	KI.vs.WT	yes
ENSMUSG00000121266	-405867250875332	3010000000000	862000000	1900460303584520	chr1	125363743	125364241	499	+	ENSMUSG00000121266.1	lncRNA	KI.vs.WT	yes
ENSMUSG00000120429	-3.30044e+16	3010000000000	876000000	2.10588e+16	chr8	84930373	84930713	341	-	ENSMUSG00000120429.1	lncRNA	KI.vs.WT	yes
ENSMUSG00000120595	-4866128045036080	331000000000	10200000000	0.5532390147545476	chr12	86288041	86288510	470	-	ENSMUSG00000120595.1	lncRNA	KI.vs.WT	yes
2410006H16Rik	-1.10867e+16	331000000000	10600000000	5303404817854510	chr11	62493650	62495725	2076	+	ENSMUSG00000086841.3	lncRNA	KI.vs.WT	yes
ENSMUSG00000120677	-3804332041032660	331000000000	1060000000	2.35282e+16	chr11	69309935	69310993	1059	+	ENSMUSG00000120677.1	lncRNA	KI.vs.WT	yes
Gt(ROSA)26Sor	-1.57226e+16	331000000000	10600000000	3116950946890060	chr6	113043843	113054294	10452	-	ENSMUSG00000086429.11	lncRNA	KI.vs.WT	yes
Gm50336	-3.58287e+16	331000000000	10800000000	0.920356421309621	chr17	34339542	34340132	591	+	ENSMUSG00000117829.2	lncRNA	KI.vs.WT	yes
Gm37125	-3.53488e+16	331000000000	10900000000	2.80113e+16	chr1	172340816	172342414	1599	+	ENSMUSG00000104351.3	TEC	KI.vs.WT	yes
Hnrnpa2b1	-0.6688451745735503	331000000000	1160000000	913207810376537	chr6	51437912	51446874	8963	-	ENSMUSG00000004980.17	protein_coding	KI.vs.WT	yes
Eid3	-2431994984162620	331000000000	11600000000	1.68524e+16	chr10	82702460	82703764	1305	+	ENSMUSG00000109864.2	protein_coding	KI.vs.WT	yes
Gm50019	-3338036738229620	331000000000	11700000000	2.24063e+16	chr17	30216930	30223665	6736	-	ENSMUSG00000117371.3	lncRNA	KI.vs.WT	yes
Srsf3	-0.82151220606126	331000000000	11800000000	6738880450323520	chr17	29251602	29262347	10746	+	ENSMUSG00000071172.14	protein_coding	KI.vs.WT	yes
ENSMUSG00000121251	-2.59794e+16	331000000000	12000000000	2441741852106990	chr11	6576148	6577523	1376	+	ENSMUSG00000121251.1	lncRNA	KI.vs.WT	yes
ENSMUSG00000119963	-3994562552254030	331000000000	12000000000	2187121146784700	chr4	57956895	57959025	2131	+	ENSMUSG00000119963.1	lncRNA	KI.vs.WT	yes
1700047O18Rik	-3.43466e+16	331000000000	12500000000	1.12442e+16	chr7	12514787	12515529	743	+	ENSMUSG00000109594.2	TEC	KI.vs.WT	yes
Clk1	-1.11281e+16	331000000000	12600000000	8096579544731780	chr1	58449348	58463225	13878	-	ENSMUSG00000026034.18	protein_coding	KI.vs.WT	yes
H4c1	-2.04898e+16	331000000000	12700000000	1.9754e+16	chr13	23944675	23945213	539	-	ENSMUSG00000060093.7	protein_coding	KI.vs.WT	yes
ENSMUSG00000121020	-2.5117e+16	331000000000	12800000000	2.0948e+16	chr8	112369876	112370553	678	-	ENSMUSG00000121020.1	lncRNA	KI.vs.WT	yes
ENSMUSG00000120135	-3.16448e+16	331000000000	13000000000	2.6135e+16	chr7	73208554	73209649	1096	+	ENSMUSG00000120135.1	lncRNA	KI.vs.WT	yes
ENSMUSG00000119946	-2540900853604130	331000000000	13000000000	3.49541e+16	chr5	130199795	130200622	828	-	ENSMUSG00000119946.1	lncRNA	KI.vs.WT	yes
Ubc	-1.67847e+16	351000000000	14000000000	7.45217e+16	chr5	125463029	125467266	4238	-	ENSMUSG00000008348.10	protein_coding	KI.vs.WT	yes
D830025C05Rik	-3.8126e+16	367000000000	14800000000	1.41544e+16	chr8	26087028	26089223	2196	+	ENSMUSG00000043794.9	lncRNA	KI.vs.WT	yes
B230369F24Rik	-2.88467e+16	371000000000	15300000000	2.55215e+16	chr1	178105162	178146114	40953	-	ENSMUSG00000086350.3	lncRNA	KI.vs.WT	yes
H1f2	-1.53197e+16	371000000000	15400000000	71712433208079	chr13	23922791	23924350	1560	+	ENSMUSG00000036181.3	protein_coding	KI.vs.WT	yes
Gm26616	-3488201567419740	390000000000	16400000000	1.36126e+16	chr1	133056414	133059520	3107	-	ENSMUSG00000102425.2	TEC	KI.vs.WT	yes
1700061A03Rik	-3.91957e+16	396000000000	16900000000	1.56145e+16	chr19	5538772	5539226	455	-	ENSMUSG00000117966.2	TEC	KI.vs.WT	yes
Gm42809	-2703117670176540	396000000000	17100000000	1.88237e+16	chr3	89820223	89821360	1138	+	ENSMUSG00000105941.2	lncRNA	KI.vs.WT	yes
Gm4430	-3935267310647280	3960000000000	17300000000	1400768801109960	chr2	129038006	129039046	1041	-	ENSMUSG00000103532.2	TEC	KI.vs.WT	yes
ENSMUSG00000121048	-2.22448e+16	405000000000	18000000000	2166788816395840	chr6	125230137	125231248	1112	-	ENSMUSG00000121048.1	lncRNA	KI.vs.WT	yes
Gm37820	-3.70418e+16	405000000000	18200000000	2.41815e+16	chr14	61920959	61923105	2147	+	ENSMUSG00000104187.2	TEC	KI.vs.WT	yes
ENSMUSG00000120710	-3.56875e+16	405000000000	185000000	1.84997e+16	chr8	84963982	84965120	1139	+	ENSMUSG00000120710.1	lncRNA	KI.vs.WT	yes
Plk3	-2071715744813350	405000000000	18800000000	555781255482287	chr4	116985852	116991160	5309	-	ENSMUSG00000028680.15	protein_coding	KI.vs.WT	yes
ENSMUSG00000120371	-3.77027e+16	405000000000	18900000000	2.7375e+16	chr15	98882985	98883714	730	-	ENSMUSG00000120371.1	lncRNA	KI.vs.WT	yes
Rnu11	-1.81583e+16	4100000000000	19400000000	5170551402788700	chr4	131997391	131997524	134	-	ENSMUSG00000077323.3	snRNA	KI.vs.WT	yes
4933421O10Rik	-1.88132e+16	4100000000000	19500000000	5516469108646660	chr4	33027142	33031323	4182	-	ENSMUSG00000085037.2	lncRNA	KI.vs.WT	yes
ENSMUSG00000120486	-3.27462e+16	425000000000	20900000000	1.46259e+16	chr11	69307613	69308956	1344	-	ENSMUSG00000120486.1	lncRNA	KI.vs.WT	yes
Gm15889	-2.53209e+16	425000000000	20900000000	2743108958596240	chr8	95104458	95106951	2494	+	ENSMUSG00000089712.4	lncRNA	KI.vs.WT	yes
Slc12a3	-2.43369e+16	425000000000	20900000000	2.06556e+16	chr8	95055829	95092842	37014	+	ENSMUSG00000031766.5	protein_coding	KI.vs.WT	yes
ENSMUSG00000120985	-1.95436e+16	425000000000	21200000000	1.56915e+16	chr7	18961583	18961948	366	-	ENSMUSG00000120985.1	lncRNA	KI.vs.WT	yes
Gm45133	-1.83544e+16	425000000000	21400000000	2.28744e+16	chr7	5062276	5065098	2823	-	ENSMUSG00000109274.3	TEC	KI.vs.WT	yes
ENSMUSG00000120503	-2.47443e+16	427000000000	21800000000	2436531063348840	chr10	99096789	99098919	2131	-	ENSMUSG00000120503.1	lncRNA	KI.vs.WT	yes
Meig1	-3.67125e+16	427000000000	2200000000	2.97813e+16	chr2	3410080	3423685	13606	-	ENSMUSG00000026650.16	protein_coding	KI.vs.WT	yes
Cfap45	-1.96128e+16	434000000000	22700000000	2.77112e+16	chr1	172348368	172373437	25070	+	ENSMUSG00000026546.17	protein_coding	KI.vs.WT	yes
Ptma	-0.6607141161437274	434000000000	2310000000	8247781195905390	chr1	86454448	86458434	3987	+	ENSMUSG00000026238.15	protein_coding	KI.vs.WT	yes
4833438C02Rik	-2443318255356590	434000000000	23100000000	4687226645478270	chr19	46292020	46294075	2056	-	ENSMUSG00000118087.3	lncRNA	KI.vs.WT	yes
ENSMUSG00000120196	-3457282472448160	436000000000	23500000000	0.7498949333362328	chr11	51988138	51989394	1257	-	ENSMUSG00000120196.1	lncRNA	KI.vs.WT	yes
Ubb	-0.5880761885656834	4380000000000	23900000000	7858068960362450	chr11	62441997	62444039	2043	+	ENSMUSG00000019505.8	protein_coding	KI.vs.WT	yes
Gm48713	4113240113119270	4380000000000	24100000000	-0.6109471700415945	chr12	37988462	37991307	2846	+	ENSMUSG00000113154.2	TEC	KI.vs.WT	yes
Gm42435	-4012814024381540	467000000000	25900000000	1.2482e+16	chr5	3548625	3550072	1448	-	ENSMUSG00000105534.2	lncRNA	KI.vs.WT	yes
Gm10802	-2464696792602500	475000000000	27000000000	396851551205432	chr19	10817527	10819126	1600	-	ENSMUSG00000118027.2	lncRNA	KI.vs.WT	yes
ENSMUSG00000120001	-3.58307e+16	475000000000	2700000000	2105324394417980	chr7	34756128	34757070	943	+	ENSMUSG00000120001.1	lncRNA	KI.vs.WT	yes
ENSMUSG00000120054	-2.44054e+16	475000000000	2740000000	490599988824324	chr7	28080088	28081397	1310	-	ENSMUSG00000120054.1	lncRNA	KI.vs.WT	yes
Gm10762	-1.86522e+16	475000000000	27400000000	2901092018479100	chr2	128807425	128809964	2540	-	ENSMUSG00000074807.4	lncRNA	KI.vs.WT	yes
2010013B24Rik	-2.14386e+16	4840000000000	2850000000	2134762725923430	chr6	145248878	145254677	5800	+	ENSMUSG00000087277.2	lncRNA	KI.vs.WT	yes
Gm44668	-2079138658651120	4840000000000	28600000000	3890451132282410	chr7	67017464	67020728	3265	-	ENSMUSG00000109363.2	TEC	KI.vs.WT	yes
Gm10472	-2.89648e+16	4840000000000	28800000000	0.08065548180395554	chr5	24654606	24656707	2102	-	ENSMUSG00000104190.2	TEC	KI.vs.WT	yes
2810013P06Rik	-2.63597e+16	488000000000	29500000000	4439283186731310	chr8	123769156	123771349	2194	+	ENSMUSG00000099881.3	lncRNA	KI.vs.WT	yes
Bola1	-1.49965e+16	488000000000	29500000000	2.8881e+16	chr3	96103904	96127025	23122	-	ENSMUSG00000015943.12	protein_coding	KI.vs.WT	yes
Eif1	-0.799521674613529	505000000000	3120000000	7377704778442740	chr11	100210711	100212922	2212	+	ENSMUSG00000035530.14	protein_coding	KI.vs.WT	yes
Nfkb2	-1.13475e+16	505000000000	31200000000	5730179677316830	chr19	46292759	46300824	8066	+	ENSMUSG00000025225.16	protein_coding	KI.vs.WT	yes
ENSMUSG00000120958	-3.73295e+16	505000000000	3140000000	0.8720677824349969	chr10	58282371	58282472	102	-	ENSMUSG00000120958.1	lncRNA	KI.vs.WT	yes
ENSMUSG00000120633	-3354289506978990	506000000000	31800000000	1.60007e+16	chr8	111985899	111986270	372	+	ENSMUSG00000120633.1	lncRNA	KI.vs.WT	yes
Gm12279	-280104235271261	520000000000	33000000000	2802018358514760	chr11	62435063	62441867	6805	-	ENSMUSG00000087120.3	lncRNA	KI.vs.WT	yes
Myl12a	-1120067121144320	524000000000	33700000000	4685118528179870	chr17	71300651	71309873	9223	-	ENSMUSG00000024048.16	protein_coding	KI.vs.WT	yes
Ccnl1	-2.22477e+16	524000000000	34100000000	8222638416039220	chr3	65853572	65865670	12099	-	ENSMUSG00000027829.16	protein_coding	KI.vs.WT	yes
ENSMUSG00000120586	-4081708118382000	524000000000	3420000000	2.62894e+16	chr8	84923650	84924104	455	-	ENSMUSG00000120586.1	lncRNA	KI.vs.WT	yes
ENSMUSG00000120867	-4900948624529090	524000000000	34300000000	-0.7682139932066486	chr11	87642630	87643018	389	+	ENSMUSG00000120867.1	lncRNA	KI.vs.WT	yes
Nfkbib	-1411308745573770	534000000000	35300000000	4874672632063640	chr7	28457676	28466937	9262	-	ENSMUSG00000030595.16	protein_coding	KI.vs.WT	yes
Gm11769	-2.67142e+16	552000000000	37100000000	1.67317e+16	chr11	120041388	120043167	1780	+	ENSMUSG00000085636.2	lncRNA	KI.vs.WT	yes
Rassf1	-1.19407e+16	552000000000	3770000000	4132036994708170	chr9	107428754	107439466	10713	+	ENSMUSG00000010067.14	protein_coding	KI.vs.WT	yes
ENSMUSG00000120272	-2.04236e+16	552000000000	377000000	1.92245e+16	chr13	58276803	58277908	1106	+	ENSMUSG00000120272.1	lncRNA	KI.vs.WT	yes
Tifa	-0.7274567916886929	552000000000	3780000000	6.1097e+16	chr3	127583454	127625813	42360	+	ENSMUSG00000046688.15	protein_coding	KI.vs.WT	yes
ENSMUSG00000121201	-2934361995735660	552000000000	38100000000	1.68542e+16	chr7	63555226	63556752	1527	+	ENSMUSG00000121201.1	lncRNA	KI.vs.WT	yes
Gm37305	-2.52769e+16	553000000000	3850000000	5232884104088860	chr3	65865179	65869457	4279	+	ENSMUSG00000103041.2	lncRNA	KI.vs.WT	yes
Gm16279	-2.66854e+16	55800000000	3910000000	0.625904205149492	chr17	36207838	36223107	15270	+	ENSMUSG00000084998.2	lncRNA	KI.vs.WT	yes
Sgk1	-1.32882e+16	583000000000	4120000000	8667487769541170	chr10	21758083	21875802	117720	+	ENSMUSG00000019970.16	protein_coding	KI.vs.WT	yes
2810402E24Rik	-1.64205e+16	594000000000	4230000000	292302114690846	chr14	20691068	20694116	3049	+	ENSMUSG00000099966.3	lncRNA	KI.vs.WT	yes
ENSMUSG00000120125	-3.45146e+16	644000000000	46200000000	1.85038e+16	chr1	172340840	172341502	663	-	ENSMUSG00000120125.1	lncRNA	KI.vs.WT	yes
Slc5a3	0.9358901615757731	650000000000	470000000	4.97973e+16	chr16	91855210	91884361	29152	+	ENSMUSG00000089774.3	protein_coding	KI.vs.WT	yes
ENSMUSG00000120539	-2212972434515380	656000000000	4850000000	2973683161940590	chr18	35065184	35068507	3324	+	ENSMUSG00000120539.1	lncRNA	KI.vs.WT	yes
Gm42660	-3689898840364670	656000000000	4870000000	1.31252e+16	chr5	21336074	21337020	947	+	ENSMUSG00000106104.2	TEC	KI.vs.WT	yes
ENSMUSG00000121104	-2799486285507910	656000000000	4870000000	0.6753125271567026	chr3	95857991	95858385	395	-	ENSMUSG00000121104.1	lncRNA	KI.vs.WT	yes
Gm43010	-2.11857e+16	656000000000	4950000000	3332540992244930	chr3	126419529	126422406	2878	+	ENSMUSG00000104571.2	TEC	KI.vs.WT	yes
Midn	-0.983465495080435	656000000000	4950000000	5902021979703160	chr10	79984106	79994202	10097	+	ENSMUSG00000035621.14	protein_coding	KI.vs.WT	yes
Gm10744	-3993359768553200	656000000000	4960000000	-0.43449555100661236	chr10	118716854	118719559	2706	-	ENSMUSG00000112402.2	TEC	KI.vs.WT	yes
Egr1	-2.55643e+16	656000000000	500000000	9918167372528830	chr18	34992876	34998037	5162	+	ENSMUSG00000038418.8	protein_coding	KI.vs.WT	yes
ENSMUSG00000120462	2810585574782620	658000000000	5050000000	3.15264e+16	chr16	4291610	4293081	1472	-	ENSMUSG00000120462.1	lncRNA	KI.vs.WT	yes
Gm43362	-1.41021e+16	667000000000	5160000000	3.00702e+16	chr3	157739577	157742046	2470	-	ENSMUSG00000105201.2	TEC	KI.vs.WT	yes
Gm33370	-2.18383e+16	680000000000	5300000000	1.88252e+16	chr5	97057565	97070053	12489	-	ENSMUSG00000105283.3	lncRNA	KI.vs.WT	yes
Gm5112	-2.58728e+16	693000000000	5440000000	2.19217e+16	chr6	122788129	122790496	2368	+	ENSMUSG00000107868.2	TEC	KI.vs.WT	yes
Jun	-1.67601e+16	701000000000	5540000000	1.10619e+16	chr4	94937271	94940459	3189	-	ENSMUSG00000052684.5	protein_coding	KI.vs.WT	yes
Ndn	2280900731999270	715000000000	5730000000	1.60888e+16	chr7	61996317	62000010	3694	+	ENSMUSG00000033585.6	protein_coding	KI.vs.WT	yes
Rhoh	-0.9609867032708552	715000000000	5730000000	6.52317e+16	chr5	66018556	66054043	35488	+	ENSMUSG00000029204.8	protein_coding	KI.vs.WT	yes
Gm11613	-2.2882e+16	720000000000	58100000000	3.73765e+16	chr11	97535010	97551193	16184	-	ENSMUSG00000085586.3	lncRNA	KI.vs.WT	yes
Zc3h10	-1098904169381960	72500000000	589000000	4168547115891840	chr10	128377832	128383643	5812	-	ENSMUSG00000039810.12	protein_coding	KI.vs.WT	yes
Gm10366	-2.25637e+16	734000000000	6010000000	1094557841144990	chr14	54700499	54702199	1701	-	ENSMUSG00000115767.2	lncRNA	KI.vs.WT	yes
Gm34455	-3.8914e+16	759000000000	6250000000	3.71532e+16	chr17	26686534	26722174	35641	-	ENSMUSG00000118107.2	lncRNA	KI.vs.WT	yes
Gm45546	-3.02002e+16	779000000000	6470000000	4.23727e+16	chr8	71063075	71065468	2394	+	ENSMUSG00000110030.2	TEC	KI.vs.WT	yes
ENSMUSG00000120964	-3.51364e+16	779000000000	6500000000	1.45211e+16	chr2	22663793	22664323	531	-	ENSMUSG00000120964.1	lncRNA	KI.vs.WT	yes
Lrrc75aos2	-2.39987e+16	785000000000	660000000	1.82303e+16	chr11	62496592	62498574	1983	+	ENSMUSG00000085762.2	lncRNA	KI.vs.WT	yes
Gm44851	-3358219824272170	795000000000	6750000000	0.6547752716730195	chr7	80054017	80056325	2309	+	ENSMUSG00000108436.2	lncRNA	KI.vs.WT	yes
Id2	-2.33396e+16	795000000000	6770000000	6.91896e+16	chr12	25143798	25147139	3342	-	ENSMUSG00000020644.10	protein_coding	KI.vs.WT	yes
Fos	-3.19334e+16	801000000000	68900000000	9653788760797130	chr12	85520664	85524047	3384	+	ENSMUSG00000021250.14	protein_coding	KI.vs.WT	yes
Jmjd6	-0.8551732299909895	801000000000	70100000	4496896809035110	chr11	116728258	116734275	6018	-	ENSMUSG00000056962.12	protein_coding	KI.vs.WT	yes
Il1bos	-2.78835e+16	801000000000	704000000	1.29304e+16	chr2	129211817	129217668	5852	+	ENSMUSG00000074805.6	lncRNA	KI.vs.WT	yes
ENSMUSG00000120029	-2326394385072200	801000000000	7050000000	2.13627e+16	chr18	35087715	35089429	1715	+	ENSMUSG00000120029.1	lncRNA	KI.vs.WT	yes
Gm45177	3.89486e+16	801000000000	7050000000	1.85207e+16	chr7	90789172	90791478	2307	+	ENSMUSG00000108819.2	TEC	KI.vs.WT	yes
Ccdc86	-1.36567e+16	806000000000	71400000000	5403653417083140	chr19	10918845	10926630	7786	-	ENSMUSG00000024732.8	protein_coding	KI.vs.WT	yes
4833418N02Rik	-1.93638e+16	808000000000	72900000000	2600339372819600	chr17	87582308	87590242	7935	-	ENSMUSG00000085287.10	lncRNA	KI.vs.WT	yes
ENSMUSG00000121063	-1342211345960310	808000000000	7300000000	4935323950666520	chr13	89531828	89532943	1116	-	ENSMUSG00000121063.1	lncRNA	KI.vs.WT	yes
ENSMUSG00000120122	-2.49964e+16	808000000000	73300000000	2565541472999050	chr4	129393768	129394643	876	-	ENSMUSG00000120122.1	lncRNA	KI.vs.WT	yes
Gps2	-0.4738892114335412	808000000000	7350000000	5817776581926540	chr11	69804714	69807417	2704	+	ENSMUSG00000023170.15	protein_coding	KI.vs.WT	no
ENSMUSG00000120567	-3.13576e+16	808000000000	74000000000	2910795957093690	chr4	122780047	122780785	739	+	ENSMUSG00000120567.1	lncRNA	KI.vs.WT	yes
Gm31410	-2383508616059580	808000000000	7430000000	2.47587e+16	chr9	116047870	116078821	30952	+	ENSMUSG00000111324.2	lncRNA	KI.vs.WT	yes
Dnajb4	-1.45336e+16	80900000000	7480000000	5876815398019790	chr3	151884148	151915939	31792	-	ENSMUSG00000028035.14	protein_coding	KI.vs.WT	yes
1300014J16Rik	-251891156117583	811000000000	7550000000	1.57278e+16	chr12	80162579	80165374	2796	+	ENSMUSG00000112545.3	lncRNA	KI.vs.WT	yes
Rhob	-1.08307e+16	811000000000	7600000000	990172671756804	chr12	8547661	8550009	2349	-	ENSMUSG00000054364.6	protein_coding	KI.vs.WT	yes
Kdm6b	-1.55166e+16	811000000000	763000000	7492030968325290	chr11	69289334	69304501	15168	-	ENSMUSG00000018476.8	protein_coding	KI.vs.WT	yes
Fndc7	-2.39599e+16	830000000000	7860000000	3.72664e+16	chr3	108760994	108797324	36331	-	ENSMUSG00000045326.14	protein_coding	KI.vs.WT	yes
Srsf2	-0.7481089931031799	840000000000	8010000000	6756458506142110	chr11	116740727	116743920	3194	-	ENSMUSG00000034120.19	protein_coding	KI.vs.WT	yes
A730061H03Rik	-3066985862516230	846000000000	8110000000	2.37642e+16	chr14	55796554	55797865	1312	-	ENSMUSG00000053588.5	lncRNA	KI.vs.WT	yes
Clcf1	-1.56244e+16	846000000000	8160000000	3091602991543470	chr19	4264292	4273544	9253	+	ENSMUSG00000040663.10	protein_coding	KI.vs.WT	yes
ENSMUSG00000119947	-2.52125e+16	847000000000	822000000	1.17791e+16	chr18	77151602	77152864	1263	-	ENSMUSG00000119947.1	lncRNA	KI.vs.WT	yes
ENSMUSG00000120261	-1.29087e+16	847000000000	8260000000	3.82971e+16	chr10	37015277	37017325	2049	-	ENSMUSG00000120261.1	lncRNA	KI.vs.WT	yes
Taf1d	-0.7646144047326104	850000000000	8340000000	5666484554354010	chr9	15217510	15228287	10778	+	ENSMUSG00000031939.17	protein_coding	KI.vs.WT	yes
Gm17251	-2033639802458440	850000000000	842000000	239623301181966	chr17	33978946	33980845	1900	+	ENSMUSG00000090952.4	lncRNA	KI.vs.WT	yes
1700055D18Rik	-2.17244e+16	850000000000	843000000	1.77588e+16	chr4	45011687	45015406	3720	+	ENSMUSG00000070997.5	lncRNA	KI.vs.WT	yes
ENSMUSG00000120030	-2.74388e+16	903000000000	9010000000	2723568001699240	chr9	64701734	64718408	16675	-	ENSMUSG00000120030.1	lncRNA	KI.vs.WT	yes
Srsf5	-1.12768e+16	91800000000	928000000	8070241444193710	chr12	80992278	80997281	5004	+	ENSMUSG00000021134.18	protein_coding	KI.vs.WT	yes
4933433G15Rik	-2.26473e+16	91800000000	9310000000	4310502063244800	chr9	75317466	75324991	7526	+	ENSMUSG00000097021.8	lncRNA	KI.vs.WT	yes
Vmp1	-1.47654e+16	91800000000	937000000	6269445747955660	chr11	86474691	86574662	99972	-	ENSMUSG00000018171.10	protein_coding	KI.vs.WT	yes
D930030I03Rik	-2771578084739840	91800000000	9370000000	1.56891e+16	chr16	38272344	38273905	1562	+	ENSMUSG00000097576.4	lncRNA	KI.vs.WT	yes
Arc	1.63109e+16	928000000000	9540000000	4591281627603570	chr15	74540932	74544419	3488	-	ENSMUSG00000022602.15	protein_coding	KI.vs.WT	yes
ENSMUSG00000121122	-245607940045591	928000000000	9620000000	2.16021e+16	chr17	71159014	71159308	295	+	ENSMUSG00000121122.1	lncRNA	KI.vs.WT	yes
B130055M24Rik	1.65652e+16	928000000000	9620000000	1.92032e+16	chr7	127047807	127059532	11726	+	ENSMUSG00000086502.3	lncRNA	KI.vs.WT	yes
Dgat2l6	3.84275e+16	938000000000	982000000	-0.23371453600050704	chrX	99568444	99589750	21307	+	ENSMUSG00000067597.6	protein_coding	KI.vs.WT	yes
Rpl22l1	-1.58654e+16	938000000000	9850000000	4822775198924550	chr3	28859585	28861573	1989	+	ENSMUSG00000039221.11	protein_coding	KI.vs.WT	yes
ENSMUSG00000120706	-2.65039e+16	938000000000	993000000	1.40447e+16	chr1	86369754	86370268	515	-	ENSMUSG00000120706.1	lncRNA	KI.vs.WT	yes
Ubald1	-0.555049918302162	938000000000	9940000000	5496906245059570	chr16	4692642	4698179	5538	-	ENSMUSG00000039568.7	protein_coding	KI.vs.WT	yes
H3f3b	-1.22621e+16	948000000000	101000000000	8894313733063010	chr11	115912738	115918788	6051	-	ENSMUSG00000016559.15	protein_coding	KI.vs.WT	yes
Synpr	1.77226e+16	952000000000	102000000000	3628139112898870	chr14	8853423	9184983	331561	-	ENSMUSG00000056296.18	protein_coding	KI.vs.WT	yes
Gm37472	-1.37873e+16	952000000000	102000000000	6327081403733400	chr14	61914892	61918943	4052	-	ENSMUSG00000102151.2	TEC	KI.vs.WT	yes
Smkr-ps	-3.57477e+16	961000000000	104000000000	1.48514e+16	chr6	29985234	29993782	8549	+	ENSMUSG00000045709.13	transcribed_unitary_pseudogene	KI.vs.WT	yes
Dusp1	-2.45536e+16	98200000000	107000000000	8644103259485320	chr17	26724564	26781102	56539	-	ENSMUSG00000024190.8	protein_coding	KI.vs.WT	yes
Kcna1	1.70729e+16	98200000000	10700000000	2.65259e+16	chr6	126617360	126623347	5988	-	ENSMUSG00000047976.5	protein_coding	KI.vs.WT	yes
Ppp1r11	-0.8567046333289624	984000000000	10800000000	4.93535e+16	chr17	37259248	37262633	3386	-	ENSMUSG00000036398.14	protein_coding	KI.vs.WT	yes
ENSMUSG00000120402	-2.06167e+16	984000000000	109000000000	2.78811e+16	chr17	26727622	26728000	379	+	ENSMUSG00000120402.1	lncRNA	KI.vs.WT	yes
Mafg	-0.46408847458235136	991000000000	110000000000	6416720959495800	chr11	120515943	120524426	8484	-	ENSMUSG00000051510.14	protein_coding	KI.vs.WT	no
Zfp974	1.06729e+16	0.0010056104266585755	112000000000	3181518842081500	chr7	27606817	27628885	22069	-	ENSMUSG00000070709.13	protein_coding	KI.vs.WT	yes
Frmd8os	-3195206650640520	0.001026239580966467	115000000000	1629558913096850	chr19	5895651	5901416	5766	+	ENSMUSG00000043488.7	lncRNA	KI.vs.WT	yes
ENSMUSG00000120684	-1.97604e+16	0.0010333906103106361	116000000000	3.36063e+16	chr2	75488459	75489307	849	-	ENSMUSG00000120684.1	lncRNA	KI.vs.WT	yes
Leng9	-1.76862e+16	0.00103443663740148	11700000000	3010274024170210	chr7	4150914	4153373	2460	-	ENSMUSG00000043432.8	protein_coding	KI.vs.WT	yes
Gm44860	-109202144473501	0.00103443663740148	118000000000	5082283158181870	chr7	89679779	89682124	2346	+	ENSMUSG00000109245.2	TEC	KI.vs.WT	yes
Gm34961	-3.04699e+16	0.00103443663740148	118000000000	1.3914e+16	chr13	59971061	59981053	9993	+	ENSMUSG00000114354.3	lncRNA	KI.vs.WT	yes
Smim3	-1.61935e+16	0.0010412632701221063	120000000000	5380251368756890	chr18	60607263	60635059	27797	-	ENSMUSG00000038059.8	protein_coding	KI.vs.WT	yes
1700016G22Rik	-4692230133756200	0.0010497807720669151	121000000000	-0.5270611487680004	chr13	5905507	5908091	2585	-	ENSMUSG00000100625.8	lncRNA	KI.vs.WT	yes
Gm3807	-2.6489e+16	0.001061735162319306	123000000000	0.7911313080701586	chr11	120472496	120473663	1168	+	ENSMUSG00000102881.2	TEC	KI.vs.WT	yes
Rbm3	-1.05487e+16	0.0010828847816682999	126000000000	5447554277398790	chrX	8005214	8012119	6906	-	ENSMUSG00000031167.17	protein_coding	KI.vs.WT	yes
Gm26766	-3.25028e+16	0.001082911207739324	127000000000	1.75308e+16	chr15	37007767	37044344	36578	+	ENSMUSG00000097259.3	lncRNA	KI.vs.WT	yes
ENSMUSG00000120295	-2767244150436690	0.001082911207739324	128000000000	218268281700227	chr14	30348284	30348868	585	+	ENSMUSG00000120295.1	lncRNA	KI.vs.WT	yes
ENSMUSG00000121258	-2.08833e+16	0.001082911207739324	12800000000	2103479713395280	chr2	34761088	34762988	1901	+	ENSMUSG00000121258.1	lncRNA	KI.vs.WT	yes
Taf7	-1.46653e+16	0.001082911207739324	129000000000	5240726108621060	chr18	37773544	37777257	3714	-	ENSMUSG00000051316.9	protein_coding	KI.vs.WT	yes
Mnt	-0.581867039398462	0.001082911207739324	129000000000	5535082711689390	chr11	74721746	74736551	14806	+	ENSMUSG00000000282.13	protein_coding	KI.vs.WT	yes
ENSMUSG00000120467	-3.19065e+16	0.0010891319545959363	131000000000	0.5121709708766956	chr10	99302378	99303548	1171	-	ENSMUSG00000120467.1	lncRNA	KI.vs.WT	yes
Mir7655	-3422890598260020	0.0010891319545959363	13100000000	0.9173436112938942	chr2	18062657	18062714	58	+	ENSMUSG00000099050.3	miRNA	KI.vs.WT	yes
ENSMUSG00000120112	-1.9941e+16	0.0011308342940969049	13700000000	2.15331e+16	chr3	88048187	88049503	1317	-	ENSMUSG00000120112.1	lncRNA	KI.vs.WT	yes
Mir22hg	-1.98336e+16	0.0011560704713160517	141000000000	1.26342e+16	chr11	75352365	75357502	5138	+	ENSMUSG00000085148.2	lncRNA	KI.vs.WT	yes
ENSMUSG00000120590	-3.27392e+16	0.0011659445987434965	1420000000	0.44357570762505605	chr7	19044359	19045108	750	+	ENSMUSG00000120590.1	lncRNA	KI.vs.WT	yes
H2bc8	-1.37503e+16	0.0011732625826137552	144000000000	378529995384569	chr13	23755570	23756187	618	+	ENSMUSG00000058385.9	protein_coding	KI.vs.WT	yes
Gm14321	-1.89837e+16	0.001175070208340019	145000000000	1.81521e+16	chr2	167619387	167624489	5103	+	ENSMUSG00000084797.2	lncRNA	KI.vs.WT	yes
Gm20492	-2.04198e+16	0.001175070208340019	146000000000	1075588188930560	chr10	127124366	127125702	1337	+	ENSMUSG00000092593.3	lncRNA	KI.vs.WT	yes
B230112I24Rik	3.73574e+16	0.0011832606898392205	14700000000	-0.5859572560083978	chr6	45050500	45051728	1229	+	ENSMUSG00000107729.2	TEC	KI.vs.WT	yes
Septin2	-1.52182e+16	0.0011839497543386208	14800000000	2569610504467460	chr1	93406686	93437982	31297	+	ENSMUSG00000026276.21	protein_coding	KI.vs.WT	yes
Cln8	-0.644702756642649	0.0012026876257520288	152000000000	6553536355195890	chr8	14931335	14951720	20386	+	ENSMUSG00000026317.8	protein_coding	KI.vs.WT	yes
Ddx5	-0.8178544906252019	0.0012026876257520288	152000000000	1.03146e+16	chr11	106671181	106680011	8831	-	ENSMUSG00000020719.15	protein_coding	KI.vs.WT	yes
Zrsr2	-0.6641020488758046	0.0012026876257520288	152000000000	5213421516977560	chrX	162718439	162741657	23219	-	ENSMUSG00000031370.13	protein_coding	KI.vs.WT	yes
Ddx3x	-0.5920179216996353	0.0012026876257520288	153000000000	9.33512e+16	chrX	13147209	13160291	13083	+	ENSMUSG00000000787.13	protein_coding	KI.vs.WT	yes
Odc1	-1.56274e+16	0.0012044697568235135	15400000000	560976669559644	chr12	17594795	17601506	6712	+	ENSMUSG00000011179.9	protein_coding	KI.vs.WT	yes
Zfp36	-2.47631e+16	0.0012226096192229055	15700000000	9907868538315580	chr7	28076209	28079678	3470	-	ENSMUSG00000044786.7	protein_coding	KI.vs.WT	yes
1600020E01Rik	-1249010475531330	0.0012226096192229055	158000000000	3.71045e+16	chr6	86503229	86559448	56220	+	ENSMUSG00000097048.9	lncRNA	KI.vs.WT	yes
Atp6v0c	-1.14475e+16	0.0012342199750106457	160000000000	6739096424894650	chr17	24382840	24388676	5837	-	ENSMUSG00000024121.14	protein_coding	KI.vs.WT	yes
Gm26887	-408854077356179	0.0012477004519961359	16300000000	1771367467819710	chr8	84919403	84924296	4894	-	ENSMUSG00000097120.2	lncRNA	KI.vs.WT	yes
Hint3	-0.8454664194900081	0.0012477004519961359	16300000000	3.62856e+16	chr10	30484137	30505628	21492	-	ENSMUSG00000019791.13	protein_coding	KI.vs.WT	yes
ENSMUSG00000120673	-2.08434e+16	0.0012492058674139052	16400000000	4607564159081500	chr12	8550184	8551043	860	+	ENSMUSG00000120673.1	lncRNA	KI.vs.WT	yes
ENSMUSG00000120357	-2.09774e+16	0.0012834681395296533	17000000000	3609102817360320	chr5	125469601	125470127	527	-	ENSMUSG00000120357.1	lncRNA	KI.vs.WT	yes
2310043P16Rik	-2.11559e+16	0.0012834681395296533	17000000000	2.47276e+16	chr7	34089157	34093037	3881	+	ENSMUSG00000108732.2	TEC	KI.vs.WT	yes
ENSMUSG00000120484	-2314510398705670	0.0012834681395296533	171000000000	2.14532e+16	chr8	85711993	85712863	871	-	ENSMUSG00000120484.1	lncRNA	KI.vs.WT	yes
Me3	2472148043339500	0.0013208786921218396	176000000000	4497348575347980	chr7	89281600	89503567	221968	+	ENSMUSG00000030621.18	protein_coding	KI.vs.WT	yes
ENSMUSG00000120225	-1.95134e+16	0.0013417402554901292	18000000000	0.7199844021181948	chr15	59519029	59520013	985	-	ENSMUSG00000120225.1	lncRNA	KI.vs.WT	yes
ENSMUSG00000120516	-2055081378668880	0.0013436337345136171	181000000000	2.77112e+16	chr10	96207097	96207923	827	+	ENSMUSG00000120516.1	lncRNA	KI.vs.WT	yes
Ddit3	-1048394514558540	0.0013507747813016598	18300000000	4165059246231310	chr10	127126643	127132157	5515	+	ENSMUSG00000025408.16	protein_coding	KI.vs.WT	yes
ENSMUSG00000120202	-2215349847942590	0.0013507747813016598	18300000000	307212700669228	chr11	86648699	86649668	970	+	ENSMUSG00000120202.1	lncRNA	KI.vs.WT	yes
Sf1	-0.4953383576723017	0.0013843517016995605	189000000000	7783315159002560	chr19	6413720	6428060	14341	+	ENSMUSG00000024949.18	protein_coding	KI.vs.WT	no
Nsun6	-0.8964521162176976	0.0013923079646984715	19000000000	3.87456e+16	chr2	14999942	15059880	59939	-	ENSMUSG00000026707.16	protein_coding	KI.vs.WT	yes
Rnf19b	-1.05417e+16	0.0014481656853672514	19900000000	7.25007e+16	chr4	128952064	128979679	27616	+	ENSMUSG00000028793.16	protein_coding	KI.vs.WT	yes
Chd2	-0.3653892503232756	0.0014564828975846445	201000000000	7800902257719660	chr7	73076386	73191578	115193	-	ENSMUSG00000078671.12	protein_coding	KI.vs.WT	no
Eed	-0.5751266432925596	0.0014683649928042765	203000000000	5045520924091330	chr7	89603862	89630191	26330	-	ENSMUSG00000030619.11	protein_coding	KI.vs.WT	yes
ENSMUSG00000120308	-1.69654e+16	0.001468842240797124	2060000000	1.56867e+16	chr17	26052079	26053241	1163	+	ENSMUSG00000120308.1	lncRNA	KI.vs.WT	yes
Ube2s	-1.11632e+16	0.001468842240797124	20700000000	4.0373e+16	chr7	4797545	4815589	18045	-	ENSMUSG00000060860.9	protein_coding	KI.vs.WT	yes
ENSMUSG00000120944	-2.57147e+16	0.001468842240797124	207000000000	2104915740724870	chr8	85390851	85391202	352	+	ENSMUSG00000120944.1	lncRNA	KI.vs.WT	yes
ENSMUSG00000120114	-2.66118e+16	0.001468842240797124	207000000000	1.59979e+16	chr11	69309083	69309613	531	+	ENSMUSG00000120114.1	lncRNA	KI.vs.WT	yes
ENSMUSG00000120435	-2085595789497110	0.001468842240797124	207000000000	4312593098542120	chr5	125470515	125471282	768	+	ENSMUSG00000120435.1	lncRNA	KI.vs.WT	yes
Gm56350	-2041917064958230	0.0014758803893396486	210000000000	3456954059732060	chr2	129039169	129041114	1946	-	ENSMUSG00000103009.3	TEC	KI.vs.WT	yes
Gm23849	-2.00289e+16	0.0014758803893396486	21000000000	2.75469e+16	chr11	101518192	101518382	191	+	ENSMUSG00000119776.1	snRNA	KI.vs.WT	yes
Fbrs	-0.5652361183593833	0.0014809750021152804	212000000000	6689019795745660	chr7	127078371	127090883	12513	+	ENSMUSG00000042423.10	protein_coding	KI.vs.WT	yes
Eif4a1	-0.626595484472955	0.0014840873141264766	213000000000	7775534244346830	chr11	69557762	69563249	5488	-	ENSMUSG00000059796.17	protein_coding	KI.vs.WT	yes
Mtmr14	-0.6764032387720469	0.0015187543425896745	21900000000	493831718462556	chr6	113214804	113258353	43550	+	ENSMUSG00000030269.15	protein_coding	KI.vs.WT	yes
ENSMUSG00000119988	-2.31687e+16	0.001544730335870892	223000000000	1.03042e+16	chr10	43096118	43097402	1285	-	ENSMUSG00000119988.1	lncRNA	KI.vs.WT	yes
Dynlt4	-306320542848147	0.0015486912137125856	225000000000	1.6632e+16	chr4	116983991	116985935	1945	+	ENSMUSG00000047671.9	protein_coding	KI.vs.WT	yes
Gm37138	3817775097672070	0.001552988658045046	226000000000	0.09692934275936091	chr1	15626473	15628561	2089	+	ENSMUSG00000104149.2	TEC	KI.vs.WT	yes
Gm45472	-1401176656215130	0.0015872664910727367	233000000000	3.71698e+16	chr8	93578578	93582962	4385	-	ENSMUSG00000109669.3	lncRNA	KI.vs.WT	yes
ENSMUSG00000120117	-2.14412e+16	0.0015872664910727367	233000000000	2.46809e+16	chr11	87481106	87482595	1490	-	ENSMUSG00000120117.1	lncRNA	KI.vs.WT	yes
Zswim4	-0.8742439543245089	0.0016037321873388446	236000000000	4868036694318300	chr8	84937307	84963684	26378	-	ENSMUSG00000035671.7	protein_coding	KI.vs.WT	yes
ENSMUSG00000120734	-1.67211e+16	0.0016450097197142806	243000000000	1.17702e+16	chr7	89778701	89779087	387	+	ENSMUSG00000120734.1	lncRNA	KI.vs.WT	yes
Fam171b	0.8664464346946239	0.0016945417292548318	25200000000	5393989760956390	chr2	83642980	83713830	70851	+	ENSMUSG00000048388.4	protein_coding	KI.vs.WT	yes
Ptbp1	-0.5251624531605356	0.0016945417292548318	25300000000	7539071957611710	chr10	79690261	79700605	10345	+	ENSMUSG00000006498.17	protein_coding	KI.vs.WT	yes
Actg1	-0.9153486104398186	0.0017075105968548845	257000000000	7726466970999050	chr11	120236516	120239368	2853	-	ENSMUSG00000062825.16	protein_coding	KI.vs.WT	yes
Gm44428	-235251089739847	0.0017075105968548845	257000000000	3042847428453070	chr6	145250036	145250909	874	+	ENSMUSG00000108234.2	TEC	KI.vs.WT	yes
Gm45328	-3.30225e+16	0.0017075105968548845	25700000000	-0.029293935258128248	chr7	138792191	138793107	917	-	ENSMUSG00000110303.2	TEC	KI.vs.WT	yes
Gm11335	-3.61021e+16	0.0017253192665931557	261000000000	-0.3216428770678899	chr13	23711167	23715113	3947	-	ENSMUSG00000085016.3	lncRNA	KI.vs.WT	yes
ENSMUSG00000120409	-2.37587e+16	0.0017433362847558	265000000000	1.95375e+16	chr12	80161398	80162080	683	-	ENSMUSG00000120409.1	lncRNA	KI.vs.WT	yes
Ube2f	-0.5161215092217665	0.0017552303224071218	268000000000	5643708473829530	chr1	91178026	91218059	40034	+	ENSMUSG00000034343.15	protein_coding	KI.vs.WT	yes
Tchh	1.3023e+16	0.0017552303224071218	26900000000	3.41816e+16	chr3	93349637	93356384	6748	+	ENSMUSG00000052415.6	protein_coding	KI.vs.WT	yes
9430034N14Rik	-2.17595e+16	0.0017586473642987287	27100000000	2.8104e+16	chr1	155901969	155905753	3785	-	ENSMUSG00000102964.2	TEC	KI.vs.WT	yes
H1f4	-1.66807e+16	0.0017586473642987287	27100000000	6.43229e+16	chr13	23804612	23806541	1930	-	ENSMUSG00000051627.4	protein_coding	KI.vs.WT	yes
Gm37964	2917514895577290	0.0017750077059249623	275000000000	1.08437e+16	chr2	67728940	67733844	4905	+	ENSMUSG00000104398.2	TEC	KI.vs.WT	yes
Gm4189	-2.03786e+16	0.001820697966536243	283000000000	0.8370228596770501	chr10	127125564	127126657	1094	-	ENSMUSG00000092384.9	lncRNA	KI.vs.WT	yes
Gm17259	-1.77317e+16	0.0018399628784096528	287000000000	2.06437e+16	chr13	81926892	81931868	4977	-	ENSMUSG00000097793.3	lncRNA	KI.vs.WT	yes
1700023H06Rik	-3.10232e+16	0.0018472377258888955	289000000000	1.89422e+16	chr13	81032343	81033643	1301	-	ENSMUSG00000089827.2	lncRNA	KI.vs.WT	yes
A530058N18Rik_ENSMUSG00000087694.9	3.67546e+16	0.0018475856369001061	290000000000	-0.06576319226713791	chr2	113844083	113862773	18691	+	ENSMUSG00000087694.9	lncRNA	KI.vs.WT	yes
Pim3	-1.53357e+16	0.0018475856369001061	29100000000	3.94307e+16	chr15	88746389	88749929	3541	+	ENSMUSG00000035828.12	protein_coding	KI.vs.WT	yes
Srsf7	-0.9116000184039714	0.0018961992731171956	300000000000	6295709508079640	chr17	80507509	80514736	7228	-	ENSMUSG00000024097.12	protein_coding	KI.vs.WT	yes
Gm9993	-1973204393385530	0.0019172591775799047	304000000000	1.44759e+16	chr18	7868018	7869113	1096	-	ENSMUSG00000117505.2	lncRNA	KI.vs.WT	yes
Bcl10	-0.7114587785553832	0.0019227806456678129	30600000000	5607419720540650	chr3	145628559	145640111	11553	+	ENSMUSG00000028191.12	protein_coding	KI.vs.WT	yes
Snora31	-1.74814e+16	0.0019447455172977093	311000000000	2.08117e+16	chr14	76085345	76085474	130	+	ENSMUSG00000065147.3	snoRNA	KI.vs.WT	yes
Hmgb2	-0.9717740080523501	0.002006392378289966	32200000000	5434218348072090	chr8	57964941	57969033	4093	+	ENSMUSG00000054717.8	protein_coding	KI.vs.WT	yes
G630030J09Rik	-1725680564037960	0.0020112824079814864	32400000000	2324989089128260	chr7	30848953	30852132	3180	+	ENSMUSG00000097149.2	lncRNA	KI.vs.WT	yes
Gm43182	-2.65259e+16	0.0020155223917205675	32600000000	0.625394057912143	chr5	43939585	43942112	2528	+	ENSMUSG00000104823.2	TEC	KI.vs.WT	yes
Gm37352	-2.007e+16	0.0020155223917205675	327000000000	5640995611986620	chr8	84927498	84929678	2181	+	ENSMUSG00000103593.2	TEC	KI.vs.WT	yes
Egr3	-1.82062e+16	0.002031572631651366	330000000000	5640610087260500	chr14	70314652	70320063	5412	+	ENSMUSG00000033730.5	protein_coding	KI.vs.WT	yes
Gm29438	1322959421575590	0.0020390376976127697	333000000000	2.11795e+16	chr6	72081185	72083797	2613	+	ENSMUSG00000101823.2	TEC	KI.vs.WT	yes
5930403N24Rik	-1440351871718830	0.0020390376976127697	335000000000	288770768934182	chr10	37015398	37027311	11914	+	ENSMUSG00000046463.6	lncRNA	KI.vs.WT	yes
ENSMUSG00000120210	-2.39781e+16	0.0020390376976127697	33500000000	1.94993e+16	chr11	79227826	79230128	2303	-	ENSMUSG00000120210.1	lncRNA	KI.vs.WT	yes
Gm43526	2575453193906360	0.0020390376976127697	337000000000	0.5317461555379722	chr3	156777381	156778945	1565	+	ENSMUSG00000105803.2	TEC	KI.vs.WT	yes
ENSMUSG00000120563	-3764044903239610	0.0020390376976127697	33800000000	2224752660176570	chr7	19054200	19054924	725	+	ENSMUSG00000120563.1	lncRNA	KI.vs.WT	yes
Btbd19	-1.14165e+16	0.0020390376976127697	338000000000	3.81838e+16	chr4	116976416	116982922	6507	-	ENSMUSG00000073771.12	protein_coding	KI.vs.WT	yes
1700008J07Rik	-1.89035e+16	0.0020616088887335524	3430000000	2.07375e+16	chr7	127109610	127112041	2432	-	ENSMUSG00000101225.2	lncRNA	KI.vs.WT	yes
Btg1	-1.32477e+16	0.0020616088887335524	34400000000	8406904817337820	chr10	96452868	96458671	5804	+	ENSMUSG00000036478.9	protein_coding	KI.vs.WT	yes
4930539J05Rik	-2311771439175760	0.0020699296735440143	347000000000	2.24564e+16	chr3	135141970	135144467	2498	-	ENSMUSG00000097032.4	lncRNA	KI.vs.WT	yes
Sqstm1	-0.773661102426598	0.0020737321012377886	35000000000	7522453557245400	chr11	50090193	50101654	11462	-	ENSMUSG00000015837.16	protein_coding	KI.vs.WT	yes
ENSMUSG00000120036	-1.67899e+16	0.0020737321012377886	350000000	1.90001e+16	chr9	44515117	44515892	776	-	ENSMUSG00000120036.1	lncRNA	KI.vs.WT	yes
Birc2	-0.6180340328175685	0.0020737321012377886	35100000000	5306383168492630	chr9	7818228	7837065	18838	-	ENSMUSG00000057367.13	protein_coding	KI.vs.WT	yes
ENSMUSG00000120767	-2.57722e+16	0.0021070438986583954	358000000000	0.6291314314843668	chr15	96607841	96608233	393	+	ENSMUSG00000120767.1	lncRNA	KI.vs.WT	yes
ENSMUSG00000120994	-1.82507e+16	0.002120306226209058	36100000000	2.61375e+16	chr12	83679328	83680609	1282	+	ENSMUSG00000120994.1	lncRNA	KI.vs.WT	yes
Rbm7	-0.6031507687149295	0.0021254673888636516	363000000000	5591764146011600	chr9	48400001	48406599	6599	-	ENSMUSG00000042396.11	protein_coding	KI.vs.WT	yes
Gm26306	-3.8289e+16	0.002157266575014296	37000000000	0.026002419427454418	chr9	44307094	44307212	119	-	ENSMUSG00000088398.3	snoRNA	KI.vs.WT	yes
Gm17122	-2729041264187260	0.0022414412839661876	38600000000	0.2198001747616884	chr5	113980662	113981177	516	+	ENSMUSG00000090458.2	lncRNA	KI.vs.WT	yes
Gm49942	2.40863e+16	0.0022414412839661876	38700000000	0.29973829720897577	chr17	67233820	67237194	3375	-	ENSMUSG00000117332.2	TEC	KI.vs.WT	yes
Pnrc1	-0.8023954037932288	0.002284447088433585	396000000000	7877877551014760	chr4	33245423	33290163	44741	-	ENSMUSG00000040128.10	protein_coding	KI.vs.WT	yes
Upk1b	-0.9810325431076996	0.002315135961069605	4020000000	4328892416322900	chr16	38593546	38620690	27145	-	ENSMUSG00000049436.6	protein_coding	KI.vs.WT	yes
Gm29707	-3.0228e+16	0.0023304922102010757	406000000000	0.2813268237965208	chr5	102218084	102221817	3734	+	ENSMUSG00000106492.3	lncRNA	KI.vs.WT	yes
ENSMUSG00000120770	-3.09959e+16	0.0023685116298351088	41400000000	0.3249113468600872	chr9	99065629	99067932	2304	+	ENSMUSG00000120770.1	lncRNA	KI.vs.WT	yes
Hnrnpu	-0.38467582996262706	0.0023895685244935258	41900000000	9439707038755390	chr1	178148673	178165362	16690	-	ENSMUSG00000039630.11	protein_coding	KI.vs.WT	no
ENSMUSG00000120803	1.50729e+16	0.0023895685244935258	42100000000	1.98202e+16	chr13	9178009	9180555	2547	+	ENSMUSG00000120803.1	lncRNA	KI.vs.WT	yes
ENSMUSG00000121064	-1.71159e+16	0.0023895685244935258	42400000000	1.60654e+16	chr11	51474753	51475499	747	-	ENSMUSG00000121064.1	lncRNA	KI.vs.WT	yes
Gm34983	-241350406284667	0.0023895685244935258	42400000000	0.4243414149939357	chr10	99295551	99324472	28922	+	ENSMUSG00000112265.2	lncRNA	KI.vs.WT	yes
ENSMUSG00000120580	-1.69579e+16	0.0023895685244935258	42700000000	3.1281e+16	chr6	108779371	108805344	25974	-	ENSMUSG00000120580.1	lncRNA	KI.vs.WT	yes
Gm44850	3240635676522120	0.0023895685244935258	428000000000	0.9446030346091192	chr7	127814788	127819960	5173	-	ENSMUSG00000108604.2	lncRNA	KI.vs.WT	yes
Gm37396	3.66139e+16	0.0023895685244935258	43000000000	0.015700013492088577	chr1	123396179	123397673	1495	-	ENSMUSG00000104205.2	TEC	KI.vs.WT	yes
Gm45179	3.10053e+16	0.0023895685244935258	43100000000	206773637561156	chr7	90698207	90702543	4337	+	ENSMUSG00000108956.2	TEC	KI.vs.WT	yes
Gm37895	3719976709153290	0.0023895685244935258	431000000000	1.06866e+16	chr1	25814838	25819387	4550	-	ENSMUSG00000103924.2	TEC	KI.vs.WT	yes
Gm20186	-0.8842077137403846	0.0023895685244935258	43200000000	3991524599296460	chr6	18842933	18848532	5600	-	ENSMUSG00000106874.3	lncRNA	KI.vs.WT	yes
C330011M18Rik	-279880916344459	0.0023895685244935258	43300000000	2.36165e+16	chr8	84791865	84793916	2052	-	ENSMUSG00000056753.4	lncRNA	KI.vs.WT	yes
Zfp36l1	-0.7560984147468985	0.0024891319367749618	452000000000	8042009278231470	chr12	80154528	80159787	5260	-	ENSMUSG00000021127.8	protein_coding	KI.vs.WT	yes
4921536K21Rik	-2683340182672300	0.002504181893747802	45700000000	1.68776e+16	chr11	3836088	3845098	9011	-	ENSMUSG00000020434.5	protein_coding	KI.vs.WT	yes
Gm45223	-1.42895e+16	0.002504181893747802	45800000000	5941048675704450	chr7	89781700	89786837	5138	+	ENSMUSG00000109429.2	TEC	KI.vs.WT	yes
Vwc2	1.96504e+16	0.0025143610093261203	461000000000	1.64394e+16	chr11	11064223	11218931	154709	+	ENSMUSG00000050830.18	protein_coding	KI.vs.WT	yes
Ppp1r15b	-0.423068253002588	0.0025143610093261203	462000000000	6806602911338010	chr1	133058881	133067521	8641	+	ENSMUSG00000046062.6	protein_coding	KI.vs.WT	no
Tra2b	-0.8864483163247658	0.002523188896184667	46600000000	6932864435409200	chr16	22063299	22084755	21457	-	ENSMUSG00000022858.17	protein_coding	KI.vs.WT	yes
Mir124-2hg	2.03616e+16	0.002523188896184667	46700000000	2986848089570370	chr3	17843892	17863134	19243	+	ENSMUSG00000100252.8	lncRNA	KI.vs.WT	yes
Arid1a	-0.4090498203435986	0.0025778243222190807	47800000000	8689183006597750	chr4	133406319	133484080	77762	-	ENSMUSG00000007880.17	protein_coding	KI.vs.WT	no
ENSMUSG00000120693	-1.65337e+16	0.00258763086195238	482000000000	1463805090708520	chr9	123725016	123726308	1293	+	ENSMUSG00000120693.1	lncRNA	KI.vs.WT	yes
ENSMUSG00000120705	-1685961256687500	0.00258763086195238	48300000000	4012535075374940	chr11	102319723	102321080	1358	-	ENSMUSG00000120705.1	lncRNA	KI.vs.WT	yes
Gnl3	-1.10689e+16	0.002604721183918586	488000000000	5260549640300960	chr14	30734390	30741109	6720	-	ENSMUSG00000042354.8	protein_coding	KI.vs.WT	yes
ENSMUSG00000121280	-1599711043691750	0.0026771798048632308	50300000000	5288163468358680	chr1	66851210	66856128	4919	-	ENSMUSG00000121280.1	lncRNA	KI.vs.WT	yes
Gm33858	-1.71597e+16	0.0026906408941613797	50700000000	3.07133e+16	chr9	119898062	119899688	1627	+	ENSMUSG00000111792.2	lncRNA	KI.vs.WT	yes
Gm20371	2936717561615910	0.002698647071713341	511000000000	0.8920989823364426	chr6	80279596	80281351	1756	+	ENSMUSG00000108264.2	TEC	KI.vs.WT	yes
ENSMUSG00000120818	-1.94033e+16	0.002698647071713341	51100000000	2398420011912180	chr14	20132456	20132853	398	-	ENSMUSG00000120818.1	lncRNA	KI.vs.WT	yes
Gm50275	-2.74033e+16	0.00271005271182662	51600000000	0.2654909112725131	chr17	26755349	26757201	1853	-	ENSMUSG00000118068.2	lncRNA	KI.vs.WT	yes
Gm47819	-4015561190131930	0.00271005271182662	5160000000	0.03490451442341698	chr12	85420891	85423406	2516	+	ENSMUSG00000113488.2	lncRNA	KI.vs.WT	yes
Trmt10a	-1002745617246040	0.0027555416023760013	527000000000	3.23071e+16	chr3	137849209	137865582	16374	+	ENSMUSG00000004127.13	protein_coding	KI.vs.WT	yes
Gm12703	-3.46801e+16	0.0027594188771705988	52900000000	1.94083e+16	chr4	94918200	94936607	18408	-	ENSMUSG00000052767.6	lncRNA	KI.vs.WT	yes
Cebpa	-0.802956000844363	0.002823199831137704	54300000000	7524231537955870	chr7	34818718	34821353	2636	+	ENSMUSG00000034957.11	protein_coding	KI.vs.WT	yes
B430010I23Rik	-2253216298396630	0.0028637846649599338	552000000000	1.81284e+16	chr8	41470505	41477253	6749	+	ENSMUSG00000084960.2	lncRNA	KI.vs.WT	yes
Nexmif	0.9322205746686377	0.0028637846649599338	554000000000	2.76261e+16	chrX	103121040	103244791	123752	-	ENSMUSG00000046449.16	protein_coding	KI.vs.WT	yes
Ppp1r10	-1177462755449630	0.002871268940143581	557000000000	7561707123187730	chr17	36227326	36243175	15850	+	ENSMUSG00000039220.17	protein_coding	KI.vs.WT	yes
Spcs2-ps	-2.96147e+16	0.0029163618251041054	567000000000	-0.012044121601384619	chr2	129220191	129221316	1126	-	ENSMUSG00000081888.2	unprocessed_pseudogene	KI.vs.WT	yes
Gm8696	4.26287e+16	0.0029163618251041054	57000000000	0.30709774192685885	chr17	35173304	35173688	385	-	ENSMUSG00000092557.2	processed_pseudogene	KI.vs.WT	yes
ENSMUSG00000120826	-1.82372e+16	0.0029163618251041054	571000000000	2.89144e+16	chr11	103022147	103023712	1566	-	ENSMUSG00000120826.1	lncRNA	KI.vs.WT	yes
Ncam2	0.9459002838882159	0.002942877897645192	57700000000	3581504864184750	chr16	80997585	81423716	426132	+	ENSMUSG00000022762.19	protein_coding	KI.vs.WT	yes
9330020H09Rik	-2051224359616280	0.0029596129433515127	58200000000	2949577382511290	chr15	98465205	98467464	2260	+	ENSMUSG00000091050.3	lncRNA	KI.vs.WT	yes
Rgs1	-1.66273e+16	0.002978319518580166	58800000000	8032021658515030	chr1	144118034	144124980	6947	-	ENSMUSG00000026358.14	protein_coding	KI.vs.WT	yes
BC049715	-3.04372e+16	0.0030092909239937834	59500000000	2275950955497740	chr6	136804624	136817660	13037	+	ENSMUSG00000047515.9	protein_coding	KI.vs.WT	yes
Gm33378	2.51061e+16	0.0030152295249540524	598000000000	-0.10821832534581206	chr10	81850307	81853064	2758	+	ENSMUSG00000112790.2	TEC	KI.vs.WT	yes
Gm10616	2.8952e+16	0.003029416157815421	604000000000	0.2507851222458695	chr7	79116157	79118283	2127	+	ENSMUSG00000108599.2	TEC	KI.vs.WT	yes
Etohd2	-1.71402e+16	0.003029416157815421	606000000000	2.3911e+16	chr13	59917311	59923221	5911	+	ENSMUSG00000089875.4	lncRNA	KI.vs.WT	yes
Usp16	-0.6271518543940924	0.003029416157815421	60700000000	5744397433736040	chr16	87251591	87280405	28815	+	ENSMUSG00000025616.15	protein_coding	KI.vs.WT	yes
Junos	-1.7715e+16	0.003029416157815421	60800000000	3.52898e+16	chr4	94939771	95055555	115785	+	ENSMUSG00000087366.9	lncRNA	KI.vs.WT	yes
Adamts1	-2.11042e+16	0.0030476718463945105	61300000000	7028239307703670	chr16	85590715	85600001	9287	-	ENSMUSG00000022893.15	protein_coding	KI.vs.WT	yes
Gm44680	3.90367e+16	0.003048066966862859	61500000000	-0.1346118281723637	chr7	91284447	91287356	2910	+	ENSMUSG00000109044.2	TEC	KI.vs.WT	yes
Gm26532	-3.78879e+16	0.0030916652672476038	62600000000	0.9577783469599838	chr8	84935549	84936238	690	+	ENSMUSG00000097296.2	lncRNA	KI.vs.WT	yes
Gm15808	2797238665575020	0.003111962213928	63200000000	-0.39772802669972573	chr16	13885267	13885870	604	+	ENSMUSG00000083536.2	processed_pseudogene	KI.vs.WT	yes
Gm55403	2.56725e+16	0.003111962213928	63300000000	0.7521930644516038	chr13	13963929	13964218	290	+	ENSMUSG00002075529.1	misc_RNA	KI.vs.WT	yes
ENSMUSG00000120407	-2853884683670410	0.0031237123627283966	63700000000	0.5181463289736117	chr12	100152827	100153751	925	-	ENSMUSG00000120407.1	lncRNA	KI.vs.WT	yes
A930007I19Rik	-1.54396e+16	0.0031437863048298406	6430000000	4045095126787180	chr19	29442150	29500572	58423	-	ENSMUSG00000097855.10	lncRNA	KI.vs.WT	yes
Plppr5	1.38006e+16	0.003169235329537791	65000000000	2619580261131480	chr3	117278733	117483156	204424	+	ENSMUSG00000033342.16	protein_coding	KI.vs.WT	yes
Cdr1	2.06758e+16	0.003188944713387091	65600000000	4326439305149300	chrX	60227611	60229164	1554	-	ENSMUSG00000090546.3	lncRNA	KI.vs.WT	yes
Nmd3	-0.6525385344126159	0.003188944713387091	65900000000	4845749890349790	chr3	69629318	69663706	34389	+	ENSMUSG00000027787.15	protein_coding	KI.vs.WT	yes
Sox2ot	1.57679e+16	0.003188944713387091	66100000000	3788001056609500	chr3	34158419	34736768	578350	+	ENSMUSG00000105265.7	lncRNA	KI.vs.WT	yes
Sat1	-0.7214836320484298	0.003188944713387091	6610000000	836439002605058	chrX	153996128	153999445	3318	-	ENSMUSG00000025283.16	protein_coding	KI.vs.WT	yes
Tut7	-0.4705371811858339	0.0031994497137680495	66700000000	7541567412853510	chr13	59919375	59970961	51587	-	ENSMUSG00000035248.10	protein_coding	KI.vs.WT	no
Gm37226	3.35452e+16	0.0031994497137680495	669000000	-0.4197549418553202	chr9	88564985	88568239	3255	-	ENSMUSG00000102533.2	TEC	KI.vs.WT	yes
ENSMUSG00000120343	-2.5089e+16	0.0031994497137680495	66900000000	1.3972e+16	chr11	20691718	20692910	1193	+	ENSMUSG00000120343.1	lncRNA	KI.vs.WT	yes
Ucp2	-0.6536116001351248	0.0032295356859812214	67700000000	8826625240255850	chr7	100142544	100151227	8684	+	ENSMUSG00000033685.14	protein_coding	KI.vs.WT	yes
Neto2	1174165709517940	0.003259996302963701	68500000000	2.68941e+16	chr8	86363217	86427553	64337	-	ENSMUSG00000036902.12	protein_coding	KI.vs.WT	yes
Gm45778	-3002437734789290	0.0032648429471390183	69000000000	1.77384e+16	chr8	84476133	84476285	153	+	ENSMUSG00000110570.2	processed_pseudogene	KI.vs.WT	yes
C9orf72	-0.7535333328172629	0.0032648429471390183	69100000000	4754797691924150	chr4	35191285	35226175	34891	-	ENSMUSG00000028300.15	protein_coding	KI.vs.WT	yes
Gm25099	-1.13344e+16	0.0032648429471390183	69200000000	3.15206e+16	chr4	117047139	117047254	116	+	ENSMUSG00000119227.1	snRNA	KI.vs.WT	yes
ENSMUSG00000121109	-2773409585552600	0.0032821260361274615	69800000000	1.66294e+16	chr11	5737922	5738440	519	-	ENSMUSG00000121109.1	lncRNA	KI.vs.WT	yes
Clk3	-0.5852072290610606	0.0032821260361274615	70100000000	5867307052194430	chr9	57657907	57673143	15237	-	ENSMUSG00000032316.9	protein_coding	KI.vs.WT	yes
Dph3	-0.7528208327177128	0.0032821260361274615	70200000000	4017590378151000	chr14	31802523	31807686	5164	-	ENSMUSG00000021905.15	protein_coding	KI.vs.WT	yes
Hpn	-1370198574370620	0.0032821260361274615	70300000000	3.53295e+16	chr7	30798150	30814715	16566	-	ENSMUSG00000001249.15	protein_coding	KI.vs.WT	yes
Marcksl1	-1.58173e+16	0.0033245836155544866	71400000000	6153365518043810	chr4	129407374	129409778	2405	+	ENSMUSG00000047945.7	protein_coding	KI.vs.WT	yes
Xbp1	-0.6431295440294669	0.0033596204083550297	72300000000	6440115142914700	chr11	5470659	5475893	5235	+	ENSMUSG00000020484.20	protein_coding	KI.vs.WT	yes
ENSMUSG00000120131	-3095561115616750	0.0033705510883744283	72700000000	2.18509e+16	chr8	84917971	84919349	1379	-	ENSMUSG00000120131.1	lncRNA	KI.vs.WT	yes
Rnu5g	-1.58784e+16	0.003390912590606285	7340000000	3700159995457780	chr9	65109008	65109123	116	-	ENSMUSG00000119286.1	snRNA	KI.vs.WT	yes
ENSMUSG00000120746	-2.78959e+16	0.0034154821833544432	74100000000	2.76834e+16	chr8	84929686	84930119	434	-	ENSMUSG00000120746.1	lncRNA	KI.vs.WT	yes
Gm50069	-202134367121613	0.003419497615635069	74400000000	177575551663359	chr18	11788477	11790841	2365	-	ENSMUSG00000117634.2	lncRNA	KI.vs.WT	yes
Tra2a	-0.7594504657780705	0.003428406999328559	74800000000	6263300017486710	chr6	49220858	49240967	20110	-	ENSMUSG00000029817.12	protein_coding	KI.vs.WT	yes
Gng4	0.5797876093189679	0.0034392457630868342	75200000000	4799925794281790	chr13	13958644	14002481	43838	+	ENSMUSG00000021303.15	protein_coding	KI.vs.WT	yes
Cnot7	-0.4466987922156864	0.0034392457630868342	75400000000	5270652995621130	chr8	40945581	40968888	23308	-	ENSMUSG00000031601.17	protein_coding	KI.vs.WT	no
Gm44678	2.8793e+16	0.00345646089516762	7590000000	0.9487878447490158	chr7	90989224	90991998	2775	+	ENSMUSG00000108920.2	TEC	KI.vs.WT	yes
Gm15444	-3.91153e+16	0.003513873780070982	77400000000	-0.24004111709802983	chr3	96116943	96127484	10542	-	ENSMUSG00000086556.3	lncRNA	KI.vs.WT	yes
Syvn1	-0.567636606986119	0.003513873780070982	77800000000	49108290253688	chr19	6096606	6103742	7137	+	ENSMUSG00000024807.19	protein_coding	KI.vs.WT	yes
ENSMUSG00000120553	-3049281099113300	0.003513873780070982	77800000000	1.09957e+16	chr12	85518205	85518992	788	-	ENSMUSG00000120553.1	lncRNA	KI.vs.WT	yes
ENSMUSG00000120298	-1.17068e+16	0.003529779019276642	78600000000	2395057338569370	chr2	34692319	34693584	1266	+	ENSMUSG00000120298.1	lncRNA	KI.vs.WT	yes
Gm37899	3.16067e+16	0.003529779019276642	7870000000	1.82327e+16	chr12	109635303	109644019	8717	+	ENSMUSG00000102657.2	TEC	KI.vs.WT	yes
Socs3	-2164894194170570	0.003529779019276642	79100000000	8010325549779160	chr11	117856905	117860873	3969	-	ENSMUSG00000053113.4	protein_coding	KI.vs.WT	yes
ENSMUSG00000121237	-2.33444e+16	0.003529779019276642	79100000000	2168152933118820	chr1	134011015	134012340	1326	+	ENSMUSG00000121237.1	lncRNA	KI.vs.WT	yes
Gabrb3	1.01098e+16	0.003529779019276642	7910000000	423004752425194	chr7	57069440	57478550	409111	+	ENSMUSG00000033676.14	protein_coding	KI.vs.WT	yes
Gm12764	-2.02502e+16	0.0035695654881562626	8020000000	0.5272720747895137	chr7	34088090	34094204	6115	+	ENSMUSG00000086184.2	lncRNA	KI.vs.WT	yes
Csrnp3	1307924616792590	0.0035716820687339236	80500000000	3400727978123740	chr2	65676111	65861890	185780	+	ENSMUSG00000044647.17	protein_coding	KI.vs.WT	yes
Bicd1	1.48249e+16	0.0035887981306361606	81400000000	3727470085612710	chr6	149310384	149464827	154444	+	ENSMUSG00000003452.16	protein_coding	KI.vs.WT	yes
Sub1	-0.6083803766278008	0.0035887981306361606	81500000000	6430687286939010	chr15	11981425	11997069	15645	-	ENSMUSG00000022205.16	protein_coding	KI.vs.WT	yes
Ppp1r16b	0.6424453594694359	0.0035887981306361606	81500000000	5626839690324480	chr2	158507318	158608254	100937	+	ENSMUSG00000037754.14	protein_coding	KI.vs.WT	yes
Scn2a	1.32049e+16	0.0035945889656948784	81800000000	447502080786919	chr2	65451115	65597791	146677	+	ENSMUSG00000075318.14	protein_coding	KI.vs.WT	yes
Plekho2	-1.09059e+16	0.0036003517702820533	8210000000	6371917240692130	chr9	65459980	65487322	27343	-	ENSMUSG00000050721.10	protein_coding	KI.vs.WT	yes
E430024I08Rik	0.7093778492459815	0.0036027852251500573	82400000000	3442384042360860	chr13	74581040	74611548	30509	-	ENSMUSG00000112964.3	lncRNA	KI.vs.WT	yes
Arl4c	-0.6093846853521194	0.0036040598839776616	8260000000	782358088692961	chr1	88600847	88629943	29097	-	ENSMUSG00000049866.13	protein_coding	KI.vs.WT	yes
Hspa5	-1.11607e+16	0.003630464708867539	834000000	9993367690884780	chr2	34661982	34667559	5578	+	ENSMUSG00000026864.14	protein_coding	KI.vs.WT	yes
Gm16091	2.33189e+16	0.0036461344667866537	84000000000	-0.8116595370539679	chr8	72901445	72914699	13255	-	ENSMUSG00000087502.2	lncRNA	KI.vs.WT	yes
ENSMUSG00000119969	-3.43202e+16	0.0036461344667866537	84200000000	-0.30022614009407556	chr16	49518478	49519405	928	-	ENSMUSG00000119969.1	lncRNA	KI.vs.WT	yes
Gm15604	2.64886e+16	0.003690338459432473	8540000000	1.1264e+16	chr1	10624323	10625778	1456	-	ENSMUSG00000083422.2	processed_pseudogene	KI.vs.WT	yes
ENSMUSG00000120132	-2.72935e+16	0.0036990064498142318	85800000000	-0.4327574845673749	chrX	41237439	41237914	476	-	ENSMUSG00000120132.1	lncRNA	KI.vs.WT	yes
Gm43545	-1.86331e+16	0.003723066082913996	86600000000	1.68425e+16	chr5	104192485	104195263	2779	-	ENSMUSG00000106035.2	TEC	KI.vs.WT	yes
Gad2	0.776684834900034	0.003771706098174702	88000000000	4.58993e+16	chr2	22512217	22583886	71670	+	ENSMUSG00000026787.4	protein_coding	KI.vs.WT	yes
Sag	2.12767e+16	0.0038103916769433566	89100000000	2113220943261520	chr1	87731402	87772880	41479	+	ENSMUSG00000056055.14	protein_coding	KI.vs.WT	yes
Snhg1	-1684088546374760	0.0038103916769433566	89300000000	2.9766e+16	chr19	8700801	8703811	3011	+	ENSMUSG00000108414.3	lncRNA	KI.vs.WT	yes
Zc3h12a	-2.07367e+16	0.0038809957491438537	91200000000	5301778303490290	chr4	125012216	125021633	9418	-	ENSMUSG00000042677.8	protein_coding	KI.vs.WT	yes
Thap6	-1784945422465820	0.0038959726865723646	91700000000	3903525240223930	chr5	92110248	92119925	9678	+	ENSMUSG00000102644.7	transcribed_unitary_pseudogene	KI.vs.WT	yes
2310015A10Rik	-1.2526e+16	0.0039003881990680007	92000000000	3.18624e+16	chr12	80167320	80179640	12321	-	ENSMUSG00000097729.4	lncRNA	KI.vs.WT	yes
Gm25360	-1.34925e+16	0.003926819343130797	92900000000	2.87325e+16	chr1	72265399	72265589	191	+	ENSMUSG00000118839.1	snRNA	KI.vs.WT	yes
Gm11696	-1.48541e+16	0.003930518450429739	93200000000	4423492605391880	chr11	109243661	109254480	10820	-	ENSMUSG00000056687.11	lncRNA	KI.vs.WT	yes
E330020D12Rik	-1.54723e+16	0.00398162634274912	94600000000	2.13444e+16	chr1	153280573	153289981	9409	-	ENSMUSG00000073538.12	lncRNA	KI.vs.WT	yes
ENSMUSG00000121072	-2.27268e+16	0.00398162634274912	94900000000	0.8673825882201803	chr11	104333279	104334043	765	+	ENSMUSG00000121072.1	lncRNA	KI.vs.WT	yes
H2ac20	-1209890977128940	0.004010555702283457	95800000000	383560632378257	chr3	96127677	96128196	520	-	ENSMUSG00000068855.4	protein_coding	KI.vs.WT	yes
Junb	-1.59667e+16	0.004100434904662917	98100000000	9675793816740470	chr8	85701113	85705347	4235	-	ENSMUSG00000052837.8	protein_coding	KI.vs.WT	yes
Mcl1	-1.00228e+16	0.004103850203916878	98500000000	9029868855312350	chr3	95566099	95570487	4389	+	ENSMUSG00000038612.17	protein_coding	KI.vs.WT	yes
Gm6054	-2115538575024590	0.004172756315829895	1000000000000	0.5417409726265774	chr5	147345792	147346169	378	+	ENSMUSG00000057157.4	processed_pseudogene	KI.vs.WT	yes
5330439K02Rik	-1.8386e+16	0.004190993763263937	1010000000000	2.11639e+16	chr15	100357621	100366572	8952	-	ENSMUSG00000097827.2	lncRNA	KI.vs.WT	yes
Tbc1d10a	-0.7024196438764301	0.004190993763263937	1010000000000	535130681240542	chr11	4136789	4165505	28717	+	ENSMUSG00000034412.14	protein_coding	KI.vs.WT	yes
Gm25313	-1.5121e+16	0.004190993763263937	1010000000000	1.49519e+16	chr9	65103854	65103969	116	-	ENSMUSG00000118734.1	snRNA	KI.vs.WT	yes
Phf13	-0.6193929949587308	0.0042316946907513244	1030000000000	3737830813530700	chr4	152074090	152080715	6626	-	ENSMUSG00000047777.10	protein_coding	KI.vs.WT	yes
Gm44228	3.90642e+16	0.004319440722695507	1050000000000	0.1935663837074325	chr6	80194434	80196459	2026	+	ENSMUSG00000107996.2	TEC	KI.vs.WT	yes
Zeb2os	-0.835207557672145	0.004326701195864991	1050000000000	5.40695e+16	chr2	45000719	45004099	3381	+	ENSMUSG00000052248.18	lncRNA	KI.vs.WT	yes
Serinc5	0.8486968343070714	0.0043404692278016755	106000000000	4410084333396300	chr13	92747599	92848455	100857	+	ENSMUSG00000021703.10	protein_coding	KI.vs.WT	yes
Gm44847	387244942192582	0.0043560381275844825	107000000000	-0.07200532116628167	chr7	87732021	87734011	1991	+	ENSMUSG00000108890.2	TEC	KI.vs.WT	yes
Arpc5l	-0.4352134450203203	0.004363594923610298	1070000000000	5032832999918920	chr2	38895360	38905889	10530	+	ENSMUSG00000026755.15	protein_coding	KI.vs.WT	no
Gm47324	1.80353e+16	0.004363594923610298	1070000000000	2.03977e+16	chr7	100887425	100888485	1061	+	ENSMUSG00000111425.2	processed_pseudogene	KI.vs.WT	yes
Rpgr	1.12015e+16	0.004374967087663486	1080000000000	3.04345e+16	chrX	9939860	10083159	143300	-	ENSMUSG00000031174.18	protein_coding	KI.vs.WT	yes
Chaserr	-0.855536084238544	0.004374967087663486	1080000000000	4566247076693820	chr7	73189549	73208143	18595	-	ENSMUSG00000101970.10	lncRNA	KI.vs.WT	yes
Fosb	-2.88248e+16	0.004374967087663486	1080000000000	823521813590704	chr7	19036621	19043976	7356	-	ENSMUSG00000003545.4	protein_coding	KI.vs.WT	yes
Fam13c	1276795381701460	0.004387725360651814	1090000000000	3.11166e+16	chr10	70276311	70394566	118256	+	ENSMUSG00000043259.16	protein_coding	KI.vs.WT	yes
Gm33044	-2830616831029840	0.004500550379153171	1120000000000	0.2863431147230004	chr5	122987513	122987999	487	-	ENSMUSG00000120987.1	lncRNA	KI.vs.WT	yes
H2-K2_ENSMUSG00000067203.11	-2.74754e+16	0.004508477720924111	1120000000000	-0.5253927066642547	chr17	34194050	34197764	3715	-	ENSMUSG00000067203.11	transcribed_unprocessed_pseudogene	KI.vs.WT	yes
1810041H14Rik	-2.90818e+16	0.004597489587441596	115000000000	-0.3494170699556638	chr14	122114137	122117014	2878	-	ENSMUSG00000102112.3	lncRNA	KI.vs.WT	yes
Nfkbiz	-2.25058e+16	0.004621563940693977	1160000000000	85126187402385	chr16	55631738	55659262	27525	-	ENSMUSG00000035356.18	protein_coding	KI.vs.WT	yes
Gm38005	3.42633e+16	0.004621563940693977	1160000000000	1.01534e+16	chr1	10519470	10522214	2745	-	ENSMUSG00000103810.2	TEC	KI.vs.WT	yes
Gabra5	1.23329e+16	0.004621563940693977	1170000000000	3252787846026590	chr7	57057420	57159807	102388	-	ENSMUSG00000055078.8	protein_coding	KI.vs.WT	yes
Bcl11a	1643229139104960	0.004621563940693977	1170000000000	5234635912599430	chr11	24028056	24124123	96068	+	ENSMUSG00000000861.16	protein_coding	KI.vs.WT	yes
Ndel1	-0.5355920753181328	0.004621563940693977	1170000000000	5669138137822170	chr11	68712260	68762684	50425	-	ENSMUSG00000018736.15	protein_coding	KI.vs.WT	yes
Gm43682	1.96822e+16	0.004678002123887583	1190000000000	1.11493e+16	chr5	93324829	93326918	2090	+	ENSMUSG00000107019.2	TEC	KI.vs.WT	yes
Oard1	-0.6697067776337895	0.004678002123887583	1190000000000	4668809648932430	chr17	48717042	48724294	7253	+	ENSMUSG00000040771.15	protein_coding	KI.vs.WT	yes
4732416N19Rik	-1.7403e+16	0.0046813877254541355	1200000000000	2.2015e+16	chr6	148113665	148117229	3565	+	ENSMUSG00000107402.3	TEC	KI.vs.WT	yes
ENSMUSG00000120712	-2850436864377770	0.0046813877254541355	1200000000000	1.67932e+16	chr11	75351488	75352162	675	+	ENSMUSG00000120712.1	lncRNA	KI.vs.WT	yes
Gm42974	2.77761e+16	0.0046813877254541355	12000000000	0.933839738189123	chr3	126931486	126934139	2654	-	ENSMUSG00000104963.2	TEC	KI.vs.WT	yes
Optn	-0.7901761901543198	0.0047252778493109574	1210000000000	4237646915129250	chr2	5025453	5068862	43410	-	ENSMUSG00000026672.12	protein_coding	KI.vs.WT	yes
Arhgap20	1.58047e+16	0.004788202059485898	123000000000	3.74583e+16	chr9	51676637	51765156	88520	+	ENSMUSG00000053199.14	protein_coding	KI.vs.WT	yes
Taf13	-0.9925682555819184	0.004788202059485898	12300000000	4167508298655130	chr3	108479014	108490538	11525	+	ENSMUSG00000048100.14	protein_coding	KI.vs.WT	yes
Il10ra	-0.6637610451832213	0.00480286798578879	1240000000000	8684943554036910	chr9	45165135	45180447	15313	-	ENSMUSG00000032089.17	protein_coding	KI.vs.WT	yes
Gm36936	2.77623e+16	0.00480286798578879	124000000000	0.3980565568707321	chr9	72635422	72638170	2749	+	ENSMUSG00000102411.2	TEC	KI.vs.WT	yes
Gm42853	2266662325857350	0.004830184499369377	125000000000	2.19822e+16	chr5	116594157	116595543	1387	-	ENSMUSG00000107021.2	TEC	KI.vs.WT	yes
Gm36486	-1.89213e+16	0.004849661677707681	1260000000000	118877677715321	chr17	29649772	29656422	6651	-	ENSMUSG00000117575.3	lncRNA	KI.vs.WT	yes
Pgghg	-1.40563e+16	0.004849661677707681	1260000000000	2505908556434580	chr7	140521304	140527577	6274	+	ENSMUSG00000062031.14	protein_coding	KI.vs.WT	yes
Acox3	-0.5456549029549149	0.004856701945998379	127000000000	6848101340072860	chr5	35740384	35772696	32313	+	ENSMUSG00000029098.18	protein_coding	KI.vs.WT	yes
ENSMUSG00000120326	-2361256983123590	0.004856701945998379	1270000000000	-0.4273673567423969	chr19	29077093	29078569	1477	-	ENSMUSG00000120326.1	lncRNA	KI.vs.WT	yes
Snhg9	-2.51567e+16	0.004861332384886115	1270000000000	0.19678324475736958	chr17	24938496	24938961	466	-	ENSMUSG00000090101.3	lncRNA	KI.vs.WT	yes
ENSMUSG00000120945	-1.68301e+16	0.004868409230569719	1280000000000	1.25594e+16	chr3	108351566	108352969	1404	+	ENSMUSG00000120945.1	lncRNA	KI.vs.WT	yes
Gm44435	3.23999e+16	0.004908603581409178	129000000000	0.681613079128675	chr6	77389283	77393401	4119	-	ENSMUSG00000108005.2	TEC	KI.vs.WT	yes
ENSMUSG00000120745	-1.94975e+16	0.004908603581409178	1290000000000	1976842613868160	chr6	31090674	31091306	633	+	ENSMUSG00000120745.1	lncRNA	KI.vs.WT	yes
Hps4	-0.650170412966823	0.0049088319239732345	1300000000000	6.45151e+16	chr5	112490949	112526280	35332	+	ENSMUSG00000042328.14	protein_coding	KI.vs.WT	yes
ENSMUSG00000121151	-1.3449e+16	0.0049088319239732345	1300000000000	3717474754810860	chr17	36174665	36176598	1934	-	ENSMUSG00000121151.1	lncRNA	KI.vs.WT	yes
Gm42480	3002783552302750	0.0049088319239732345	1310000000000	-0.3827611038265311	chr5	57950501	57953095	2595	+	ENSMUSG00000105637.2	TEC	KI.vs.WT	yes
ENSMUSG00000120437	-1.48927e+16	0.0049088319239732345	1310000000000	2.2011e+16	chr10	13840929	13841413	485	-	ENSMUSG00000120437.1	lncRNA	KI.vs.WT	yes
Rnu2-10	-1357033223542420	0.0049088319239732345	1310000000000	3618128229975740	chr11	101549064	101549254	191	+	ENSMUSG00000118837.1	snRNA	KI.vs.WT	yes
Slitrk4	1.54956e+16	0.004937879153456405	132000000000	1.75145e+16	chrX	63308491	63320602	12112	-	ENSMUSG00000046699.15	protein_coding	KI.vs.WT	yes
ENSMUSG00000120048	-1.70502e+16	0.004957952088627986	1330000000000	1743508988970580	chr4	48041113	48042915	1803	-	ENSMUSG00000120048.1	lncRNA	KI.vs.WT	yes
ENSMUSG00000119950	-2.65071e+16	0.0049670874868437	1330000000000	0.7608954793791943	chr14	25378644	25379339	696	+	ENSMUSG00000119950.1	lncRNA	KI.vs.WT	yes
Gm29257	2.40273e+16	0.004991436612871977	1340000000000	0.15069057307732173	chr1	132953539	132954177	639	+	ENSMUSG00000100228.2	processed_pseudogene	KI.vs.WT	yes
Irf2bp2	-0.40836613053923426	0.004991436612871977	134000000000	789887272730966	chr8	127315035	127320725	5691	-	ENSMUSG00000051495.9	protein_coding	KI.vs.WT	no
ENSMUSG00000120180	-1.9814e+16	0.00501524926752472	136000000000	2836119233960270	chr8	35272461	35274324	1864	-	ENSMUSG00000120180.1	lncRNA	KI.vs.WT	yes
Mt1	-0.6926906823277057	0.00501524926752472	1360000000000	5663022183338340	chr8	94905710	94906955	1246	+	ENSMUSG00000031765.9	protein_coding	KI.vs.WT	yes
ENSMUSG00000120240	-2.31498e+16	0.00501524926752472	136000000000	1.22768e+16	chr10	99097445	99098819	1375	+	ENSMUSG00000120240.1	lncRNA	KI.vs.WT	yes
Atf3	-2.34083e+16	0.005043197013102445	1370000000000	8901989404727740	chr1	190902493	190950236	47744	-	ENSMUSG00000026628.14	protein_coding	KI.vs.WT	yes
Gm35755	1.90793e+16	0.005043197013102445	137000000000	1.86231e+16	chr12	38139901	38142462	2562	+	ENSMUSG00000113941.2	processed_pseudogene	KI.vs.WT	yes
Snrpa	-0.5653667908000886	0.005089776467403955	13900000000	5316730867725690	chr7	26886430	26895696	9267	-	ENSMUSG00000061479.16	protein_coding	KI.vs.WT	yes
B330016D10Rik	-1302539455762410	0.005094424002075213	1390000000000	1739840195973250	chr4	141273500	141275203	1704	+	ENSMUSG00000048406.6	pseudogene	KI.vs.WT	yes
Gm20481	3676809659003030	0.00521131321341238	143000000000	1.03718e+16	chr17	35188888	35191112	2225	+	ENSMUSG00000092609.2	lncRNA	KI.vs.WT	yes
ENSMUSG00000120594	-1.466e+16	0.005221401413274146	143000000000	2.33629e+16	chr11	86469664	86471300	1637	-	ENSMUSG00000120594.1	lncRNA	KI.vs.WT	yes
A830073O21Rik	2.87781e+16	0.005265603974551754	145000000000	0.20892076570321483	chr7	73387677	73390772	3096	-	ENSMUSG00000091890.3	TEC	KI.vs.WT	yes
Mat2a	-0.8323007195089779	0.005273449194046759	1450000000000	7041645418613800	chr6	72409782	72416541	6760	-	ENSMUSG00000053907.11	protein_coding	KI.vs.WT	yes
Gm37941	3.30663e+16	0.00527795047835398	146000000000	0.2435226307395231	chr9	86666600	86668908	2309	-	ENSMUSG00000103891.2	TEC	KI.vs.WT	yes
Gm28872	-2.61445e+16	0.00527795047835398	146000000000	0.012986807764471265	chr4	131997367	131997524	158	+	ENSMUSG00000099937.2	lncRNA	KI.vs.WT	yes
ENSMUSG00000120885	-1.69619e+16	0.005282720857301488	1460000000000	0.7834763182060259	chr7	4152326	4153392	1067	+	ENSMUSG00000120885.1	lncRNA	KI.vs.WT	yes
Pnpla7	-0.369231447102332	0.005298987572999361	1470000000000	7136640868028450	chr2	24866045	24944069	78025	+	ENSMUSG00000036833.17	protein_coding	KI.vs.WT	no
Gm10752	-2.30021e+16	0.005298987572999361	147000000000	1.39889e+16	chr10	115151551	115153329	1779	+	ENSMUSG00000112301.3	TEC	KI.vs.WT	yes
Glcci1	-1.69755e+16	0.005328830387539488	1490000000000	1.95003e+16	chr6	8509600	8597548	87949	+	ENSMUSG00000029638.18	protein_coding	KI.vs.WT	yes
Ccn1	-1.57543e+16	0.005328830387539488	1490000000000	2381023824777960	chr3	145352731	145355736	3006	-	ENSMUSG00000028195.5	protein_coding	KI.vs.WT	yes
Trim69	3.55747e+16	0.005362353587104195	150000000000	-0.5273937284765301	chr2	121991181	122009508	18328	+	ENSMUSG00000033368.9	protein_coding	KI.vs.WT	yes
Gm45176	2.69849e+16	0.005362353587104195	150000000000	2.7951e+16	chr7	90781049	90785144	4096	+	ENSMUSG00000109239.2	TEC	KI.vs.WT	yes
Tshz1	0.7426570964251333	0.005362353587104195	151000000000	6295558601732720	chr18	84029752	84105831	76080	-	ENSMUSG00000046982.12	protein_coding	KI.vs.WT	yes
Nlrp3	-1312382746216150	0.005362353587104195	151000000000	6981178013318980	chr11	59432394	59457782	25389	+	ENSMUSG00000032691.15	protein_coding	KI.vs.WT	yes
H3c6	-1.05509e+16	0.005382850239047547	1520000000000	3571467802708180	chr13	23745708	23746543	836	-	ENSMUSG00000069273.3	protein_coding	KI.vs.WT	yes
Syt1	0.8675657230075413	0.0053870387843351015	1520000000000	6322884783085480	chr10	108333511	108846843	513333	-	ENSMUSG00000035864.15	protein_coding	KI.vs.WT	yes
Gm4221	-1508963235101000	0.005416837399105312	1530000000000	2103153255326710	chr18	55123334	55212486	89153	+	ENSMUSG00000096948.4	lncRNA	KI.vs.WT	yes
ENSMUSG00000121110	-3799163028278430	0.005475272483194623	1550000000000	0.07792196876290555	chr5	125471507	125471699	193	+	ENSMUSG00000121110.1	lncRNA	KI.vs.WT	yes
Dusp18	-2.0755e+16	0.005479302739343926	1560000000000	3095134396930410	chr11	3845240	3851296	6057	+	ENSMUSG00000047205.13	protein_coding	KI.vs.WT	yes
Gm38091	-1.58168e+16	0.005481754156499573	1560000000000	1.18965e+16	chr9	89141578	89145448	3871	-	ENSMUSG00000103247.2	TEC	KI.vs.WT	yes
5730522E02Rik	2.60877e+16	0.005484949071071728	156000000000	0.4185381173338565	chr11	25552763	26160763	608001	-	ENSMUSG00000032985.16	protein_coding	KI.vs.WT	yes
Spty2d1	-0.5956895709902919	0.005497418508272387	1570000000000	6555967504187590	chr7	46640144	46658159	18016	-	ENSMUSG00000049516.10	protein_coding	KI.vs.WT	yes
Mafk	-1.09163e+16	0.005497418508272387	1580000000000	4782636909907400	chr5	139777268	139788408	11141	+	ENSMUSG00000018143.11	protein_coding	KI.vs.WT	yes
Zfp507	1450969558267470	0.005497418508272387	1580000000000	2.53452e+16	chr7	35471768	35502428	30661	-	ENSMUSG00000044452.11	protein_coding	KI.vs.WT	yes
ENSMUSG00000095041	1.67571e+16	0.005498341601537605	1590000000000	7.60562e+16	JH584304.1	52190	59690	7501	-	ENSMUSG00000095041.8	protein_coding	KI.vs.WT	yes
Gm6225	-1.58411e+16	0.005498341601537605	1590000000000	2.81361e+16	chr18	3336680	3366863	30184	+	ENSMUSG00000097746.3	lncRNA	KI.vs.WT	yes
Tmem230	-1.00647e+16	0.005498341601537605	1590000000000	4301163948915830	chr2	132081412	132089727	8316	-	ENSMUSG00000027341.11	protein_coding	KI.vs.WT	yes
ENSMUSG00000120757	-3.31065e+16	0.005498341601537605	1590000000000	-0.41333891467248135	chrX	133909600	133910587	988	+	ENSMUSG00000120757.1	lncRNA	KI.vs.WT	yes
Cnksr2	1074978441595590	0.005498341601537605	1590000000000	4162819274227790	chrX	156604432	156826290	221859	-	ENSMUSG00000025658.17	protein_coding	KI.vs.WT	yes
Rgs2	-0.809586015224428	0.005579798467742121	162000000000	822800571940582	chr1	143875076	143879899	4824	-	ENSMUSG00000026360.10	protein_coding	KI.vs.WT	yes
St8sia6	-0.8453562105059773	0.005579798467742121	1620000000000	44935862643169	chr2	13655832	13798875	143044	-	ENSMUSG00000003418.12	protein_coding	KI.vs.WT	yes
Ninj1	-0.6538343096768257	0.005636940936609697	1640000000000	5.76346e+16	chr13	49340961	49349720	8760	+	ENSMUSG00000037966.16	protein_coding	KI.vs.WT	yes
Gm42946	2.66513e+16	0.0056550506087837665	1650000000000	216437540748505	chr3	156351957	156354526	2570	+	ENSMUSG00000104696.2	TEC	KI.vs.WT	yes
Zfp622	-1.06115e+16	0.0056588305698325216	1660000000000	6.34456e+16	chr15	25984452	25998567	14116	+	ENSMUSG00000052253.7	protein_coding	KI.vs.WT	yes
Ankrd12	0.38813518751012466	0.0056588305698325216	16600000000	627091134808676	chr17	66272693	66384084	111392	-	ENSMUSG00000034647.16	protein_coding	KI.vs.WT	no
Gm45178	2899326389063410	0.0056594484616702785	1660000000000	1.48511e+16	chr7	90644517	90648626	4110	+	ENSMUSG00000109562.2	TEC	KI.vs.WT	yes
A3galt2	1.42942e+16	0.005664921431618126	167000000000	1.48578e+16	chr4	128649157	128663091	13935	+	ENSMUSG00000028794.14	protein_coding	KI.vs.WT	yes
Tmem72	-2019263501514390	0.00568199053724023	1680000000000	0.10259405423602938	chr6	116656024	116693874	37851	-	ENSMUSG00000048108.14	protein_coding	KI.vs.WT	yes
Cks2	-1.35816e+16	0.005726995870619131	169000000000	2135704438965760	chr13	51799268	51804696	5429	+	ENSMUSG00000062248.6	protein_coding	KI.vs.WT	yes
Gm43863	-1.79809e+16	0.005748763377833783	170000000000	0.7932329121993792	chr6	117893492	117894683	1192	-	ENSMUSG00000107608.2	TEC	KI.vs.WT	yes
ENSMUSG00000120625	-2.19651e+16	0.005787319276235447	172000000000	1.6735e+16	chr12	110556941	110558042	1102	-	ENSMUSG00000120625.1	lncRNA	KI.vs.WT	yes
ENSMUSG00000120199	-2.66341e+16	0.005787319276235447	172000000000	0.7373023852809724	chr7	4815917	4816587	671	+	ENSMUSG00000120199.1	lncRNA	KI.vs.WT	yes
Nat9	-0.8829635196694773	0.005787319276235447	1720000000000	3895327212702370	chr11	115073658	115078685	5028	-	ENSMUSG00000015542.18	protein_coding	KI.vs.WT	yes
A830082N09Rik	1716096949077480	0.005787319276235447	1730000000000	1.65682e+16	chr10	33863212	33871051	7840	-	ENSMUSG00000112280.2	lncRNA	KI.vs.WT	yes
Gm20544	-1.10216e+16	0.005787319276235447	1730000000000	2931865731257340	chr18	75491711	75500160	8450	-	ENSMUSG00000092569.3	lncRNA	KI.vs.WT	yes
Plppr4	1046342015809560	0.005868194550127944	176000000000	4695059771620240	chr3	117112788	117154525	41738	-	ENSMUSG00000044667.13	protein_coding	KI.vs.WT	yes
Gm47962	-1.97171e+16	0.005930449152035741	178000000000	1.58677e+16	chr10	84276643	84302873	26231	+	ENSMUSG00000111583.3	lncRNA	KI.vs.WT	yes
ENSMUSG00000120141	-2.29985e+16	0.005935030607497456	1780000000000	2.14e+16	chr19	5686716	5687398	683	-	ENSMUSG00000120141.1	lncRNA	KI.vs.WT	yes
6330537M06Rik	-1679943642321000	0.005935715338206516	179000000000	2669320923349050	chr8	71218681	71220864	2184	+	ENSMUSG00000110575.3	TEC	KI.vs.WT	yes
Snap25	0.7667774853623575	0.005946829357980001	1790000000000	6112327508152990	chr2	136555373	136624348	68976	+	ENSMUSG00000027273.14	protein_coding	KI.vs.WT	yes
Frrs1	-0.5587200459621553	0.005958149726743364	1800000000000	5265213904886610	chr3	116653113	116701826	48714	+	ENSMUSG00000033386.11	protein_coding	KI.vs.WT	yes
ENSMUSG00000120996	-1.33043e+16	0.005958149726743364	180000000000	2.63359e+16	chr3	127582505	127583896	1392	-	ENSMUSG00000120996.1	lncRNA	KI.vs.WT	yes
Catip	-1.67104e+16	0.006011722248174235	1820000000000	1.76556e+16	chr1	74401267	74408480	7214	+	ENSMUSG00000073650.10	protein_coding	KI.vs.WT	yes
Gm27003	-2123960188652610	0.006055501810370442	1840000000000	0.8945332316083181	chr2	126517824	126525725	7902	+	ENSMUSG00000098024.3	lncRNA	KI.vs.WT	yes
Hnrnpab	-0.5068355945240219	0.006063095281500662	185000000000	7650707751375070	chr11	51490927	51497674	6748	-	ENSMUSG00000020358.18	protein_coding	KI.vs.WT	yes
ENSMUSG00000120869	-2285719812800320	0.006087035773185569	1860000000000	2.78264e+16	chr12	91555228	91555453	226	+	ENSMUSG00000120869.1	lncRNA	KI.vs.WT	yes
Gm47096	-2113428664230390	0.006087035773185569	1860000000000	1.96994e+16	chr12	44267170	44315901	48732	-	ENSMUSG00000112547.3	lncRNA	KI.vs.WT	yes
Trim47	-1.24945e+16	0.006087035773185569	1870000000000	5132261150036150	chr11	115996578	116018036	21459	-	ENSMUSG00000020773.12	protein_coding	KI.vs.WT	yes
0610040B10Rik	-2.26539e+16	0.006087035773185569	1870000000000	1.0136e+16	chr5	143315002	143318459	3458	+	ENSMUSG00000089889.4	lncRNA	KI.vs.WT	yes
Gm45344	3841593829066260	0.006110680022827216	1880000000000	-0.2687996029507458	chr7	100987334	100987674	341	+	ENSMUSG00000110099.2	processed_pseudogene	KI.vs.WT	yes
Gm41693	-2.3616e+16	0.006121337493414233	188000000000	0.6832044371842163	chr18	36007367	36009090	1724	+	ENSMUSG00000118080.2	lncRNA	KI.vs.WT	yes
Gm9320	-2.08989e+16	0.006200603556840337	1910000000000	3314864569734410	chr17	71159752	71183307	23556	+	ENSMUSG00000100865.4	transcribed_processed_pseudogene	KI.vs.WT	yes
C130083A15Rik	-1.68528e+16	0.006207410735775472	1920000000000	1.31543e+16	chr7	73177014	73178473	1460	-	ENSMUSG00000108812.2	TEC	KI.vs.WT	yes
Gm48182	3.35549e+16	0.006270221954335426	1940000000000	-0.03757715220240875	chr12	44456573	44458252	1680	+	ENSMUSG00000112448.2	TEC	KI.vs.WT	yes
Ythdc1	-0.4551697965139965	0.006278256543500884	1950000000000	683344331528313	chr5	86952080	86984518	32439	+	ENSMUSG00000035851.15	protein_coding	KI.vs.WT	no
Gm49889	-1.72046e+16	0.006278256543500884	195000000000	1.93019e+16	chr17	28545927	28547495	1569	-	ENSMUSG00000117303.2	lncRNA	KI.vs.WT	yes
Zfp948	1.28332e+16	0.006398221196010525	1990000000000	1.25764e+16	chr17	21787270	21808961	21692	+	ENSMUSG00000067931.7	protein_coding	KI.vs.WT	yes
Tmem116	-1533674078857760	0.006398221196010525	1990000000000	1816453516679100	chr5	121589956	121662246	72291	+	ENSMUSG00000029452.19	protein_coding	KI.vs.WT	yes
ENSMUSG00000095742	-1.23396e+16	0.0064041524713261515	2000000000000	2316309288373900	JH584295.1	66	1479	1414	-	ENSMUSG00000095742.2	protein_coding	KI.vs.WT	yes
Mir7688	2.22666e+16	0.006411536730480806	2010000000000	0.4078261488640706	chr10	93268969	93269024	56	+	ENSMUSG00000098679.3	miRNA	KI.vs.WT	yes
Gm47794	-1.97877e+16	0.006466891490206006	2030000000000	3578878609597300	chr14	6224672	6226412	1741	-	ENSMUSG00000114907.2	lncRNA	KI.vs.WT	yes
Gstt2	-0.9187576664520175	0.00654584113218313	2050000000000	2114977415172610	chr10	75666948	75673258	6311	-	ENSMUSG00000033318.8	protein_coding	KI.vs.WT	yes
Rnf113a2	-0.690386959485706	0.006589930791388752	208000000000	3.23112e+16	chr12	84463970	84465352	1383	+	ENSMUSG00000098134.2	protein_coding	KI.vs.WT	yes
B830012L14Rik	2.19306e+16	0.006589930791388752	208000000000	2.71675e+16	chr12	109642711	109680989	38279	+	ENSMUSG00000098202.3	lncRNA	KI.vs.WT	yes
4933429H19Rik	-2.84771e+16	0.006643120026853466	2100000000000	-0.03580686468633917	chr3	30846719	30847713	995	-	ENSMUSG00000097786.4	lncRNA	KI.vs.WT	yes
Tubb6	-1.35643e+16	0.006654353591064912	2100000000000	3.76366e+16	chr18	67523787	67535819	12033	+	ENSMUSG00000001473.8	protein_coding	KI.vs.WT	yes
ENSMUSG00000120766	-2.31181e+16	0.0066657383127677	2110000000000	1.01678e+16	chr9	119152161	119153058	898	+	ENSMUSG00000120766.1	lncRNA	KI.vs.WT	yes
Cops4	-0.7868216641682936	0.006677989334052278	2120000000000	6127523977347980	chr5	100666175	100695669	29495	+	ENSMUSG00000035297.15	protein_coding	KI.vs.WT	yes
Atp6v1e1	-0.45184791690170745	0.006701037710459447	2130000000000	6284957600394290	chr6	120771266	120799754	28489	-	ENSMUSG00000019210.11	protein_coding	KI.vs.WT	no
Gm47694	1.57469e+16	0.006781566205996422	2160000000000	2434504504874720	chr14	60448423	60453868	5446	-	ENSMUSG00000114584.2	TEC	KI.vs.WT	yes
Plekho1	-0.3872131304494912	0.006781566205996422	216000000000	7.70142e+16	chr3	95895741	95903313	7573	-	ENSMUSG00000015745.10	protein_coding	KI.vs.WT	no
AU022793	-1.12231e+16	0.0067925420739019	2170000000000	2423222511759700	chr15	39826041	39830420	4380	+	ENSMUSG00000115230.3	lncRNA	KI.vs.WT	yes
H4c3	-0.7168652877250163	0.006798065153928031	218000000000	4111840761719380	chr13	23881618	23882437	820	-	ENSMUSG00000060678.6	protein_coding	KI.vs.WT	yes
Zik1	1.02579e+16	0.006798260754842665	2180000000000	2.48316e+16	chr7	10221156	10229321	8166	-	ENSMUSG00000030393.9	protein_coding	KI.vs.WT	yes
ENSMUSG00000120835	-2.21326e+16	0.006803395252178765	2190000000000	2108999707853730	chr12	85532096	85532808	713	-	ENSMUSG00000120835.1	lncRNA	KI.vs.WT	yes
Arf4	-0.6438351141614944	0.006811448325751382	2190000000000	6.66301e+16	chr14	26359229	26386239	27011	+	ENSMUSG00000021877.13	protein_coding	KI.vs.WT	yes
6330415B21Rik	3.32993e+16	0.006824599292188328	220000000000	0.5508358268233761	chr6	77357243	77359442	2200	-	ENSMUSG00000108077.2	TEC	KI.vs.WT	yes
Gm43872	2939990242796580	0.006949931802752678	2240000000000	0.2336654926721967	chr6	45112204	45114416	2213	+	ENSMUSG00000108070.2	TEC	KI.vs.WT	yes
A230006K03Rik	1.58324e+16	0.006971145737769997	226000000000	2.86618e+16	chr7	60777744	60961469	183726	-	ENSMUSG00000068151.9	lncRNA	KI.vs.WT	yes
Gm8251	3.1193e+16	0.006971145737769997	2260000000000	-0.11050364223868062	chr1	44095032	44118906	23875	-	ENSMUSG00000091844.3	protein_coding	KI.vs.WT	yes
ENSMUSG00000119956	-2536888365332230	0.006971145737769997	227000000000	0.023406421008491034	chr11	52250847	52251837	991	-	ENSMUSG00000119956.1	lncRNA	KI.vs.WT	yes
Gm12694	-2.69477e+16	0.006971145737769997	227000000000	-0.0276744026103692	chr4	94867440	94916781	49342	+	ENSMUSG00000086251.2	lncRNA	KI.vs.WT	yes
Dcx	1.45795e+16	0.006971145737769997	2270000000000	4440614446671560	chrX	142638838	142716307	77470	-	ENSMUSG00000031285.15	protein_coding	KI.vs.WT	yes
ENSMUSG00000120100	-2.06952e+16	0.006971145737769997	2280000000000	0.48072033265317443	chr12	111503451	111504383	933	-	ENSMUSG00000120100.1	lncRNA	KI.vs.WT	yes
Gm42467	-2.0997e+16	0.006971145737769997	2280000000000	0.3962210346037029	chr5	130255057	130256503	1447	+	ENSMUSG00000106751.2	TEC	KI.vs.WT	yes
Rab43	-0.7598328756163183	0.006971936527543269	2280000000000	3467793514769740	chr6	87765835	87789146	23312	-	ENSMUSG00000030055.17	protein_coding	KI.vs.WT	yes
ENSMUSG00000120352	-1335987327494470	0.0070437204994022295	231000000000	2.58503e+16	chr4	63327198	63328934	1737	-	ENSMUSG00000120352.1	lncRNA	KI.vs.WT	yes
Gm44545	-2.80777e+16	0.007065561435833428	2330000000000	1.67855e+16	chr7	100600024	100600769	746	+	ENSMUSG00000109132.2	TEC	KI.vs.WT	yes
H2bc6	-0.8689268432295879	0.007065561435833428	2330000000000	3859944534276010	chr13	23767653	23805107	37455	-	ENSMUSG00000047246.8	protein_coding	KI.vs.WT	yes
Trmt9b	1701213850652780	0.007065561435833428	2330000000000	208170069100263	chr8	36924702	36983724	59023	+	ENSMUSG00000039620.18	protein_coding	KI.vs.WT	yes
Gm40773	-1946970188649080	0.007065561435833428	2330000000000	0.4880217481867314	chr10	117700575	117703980	3406	+	ENSMUSG00000112458.2	lncRNA	KI.vs.WT	yes
5330438D12Rik	-1681423062734530	0.007080565360085555	2340000000000	2.06535e+16	chr10	116344957	116451875	106919	+	ENSMUSG00000052291.10	lncRNA	KI.vs.WT	yes
Map7d2	0.9435513579701198	0.007080565360085555	2350000000000	4539178773105400	chrX	158197568	158281753	84186	+	ENSMUSG00000041020.15	protein_coding	KI.vs.WT	yes
Gm44230	2486785509304360	0.007180108836210631	2380000000000	0.9254612088747569	chr6	80245479	80249028	3550	+	ENSMUSG00000107905.2	TEC	KI.vs.WT	yes
Gm28731	-3.03531e+16	0.007229903072831374	240000000000	-0.6224028398490166	chr9	69895682	69897250	1569	-	ENSMUSG00000101555.2	lncRNA	KI.vs.WT	yes
H1f3	-1.43396e+16	0.007294694838896374	243000000000	5093826471053470	chr13	23737436	23744860	7425	+	ENSMUSG00000052565.8	protein_coding	KI.vs.WT	yes
Ppargc1a	1.21072e+16	0.007294694838896374	2430000000000	3.90186e+16	chr5	51611592	51725068	113477	-	ENSMUSG00000029167.14	protein_coding	KI.vs.WT	yes
ENSMUSG00000121500	1.61134e+16	0.007335683353227306	2450000000000	1697974279190970	chr11	3073994	3081950	7957	+	ENSMUSG00000121500.1	lncRNA	KI.vs.WT	yes
Gm14023	-1.80135e+16	0.0073399363977380986	246000000000	2.39235e+16	chr2	129139285	129149746	10462	+	ENSMUSG00000085498.3	lncRNA	KI.vs.WT	yes
Homer2	0.9372492635190834	0.007352560750616991	2470000000000	5702548439338290	chr7	81250229	81357275	107047	-	ENSMUSG00000025813.15	protein_coding	KI.vs.WT	yes
Gm45640	-0.7742159922233196	0.007352560750616991	2470000000000	4648871171000800	chr8	91603209	91605104	1896	+	ENSMUSG00000109812.2	TEC	KI.vs.WT	yes
A630036G19Rik	3978492354418090	0.007361744990631675	248000000000	-0.641865427632742	chr16	74827740	74831819	4080	-	ENSMUSG00000116809.2	TEC	KI.vs.WT	yes
Plcb1	1295395585485940	0.007361744990631675	248000000000	5961843896866230	chr2	134627987	135317178	689192	+	ENSMUSG00000051177.17	protein_coding	KI.vs.WT	yes
Sh3tc1	-0.6507161982838457	0.00738394008977515	249000000000	5804337496313770	chr5	35854524	35897331	42808	-	ENSMUSG00000036553.17	protein_coding	KI.vs.WT	yes
Gm44559	4052601459195760	0.007439038543622854	2510000000000	-0.2688055218781765	chr7	58912671	58913682	1012	-	ENSMUSG00000108943.2	TEC	KI.vs.WT	yes
Lipe	-0.5217061779640124	0.007496211297203731	2540000000000	4793788438266940	chr7	25078952	25098135	19184	-	ENSMUSG00000003123.16	protein_coding	KI.vs.WT	yes
Rapgef4	0.9770938705034872	0.007496211297203731	2540000000000	4929978862908090	chr2	71811584	72087818	276235	+	ENSMUSG00000049044.17	protein_coding	KI.vs.WT	yes
Gm49674	5314603152167980	0.007519096252159461	255000000000	-0.5830668575928563	chr16	74669927	74672826	2900	-	ENSMUSG00000116881.2	TEC	KI.vs.WT	yes
Ier5	-1.3585e+16	0.007643588555164487	260000000000	8946926629660990	chr1	154972107	154975382	3276	-	ENSMUSG00000056708.6	protein_coding	KI.vs.WT	yes
Gm44164	-1.31658e+16	0.007643588555164487	261000000000	2.80023e+16	chr6	145184393	145186953	2561	-	ENSMUSG00000107756.2	TEC	KI.vs.WT	yes
Atp1b4	-2026128986471210	0.007643588555164487	261000000000	2035994176563000	chrX	37405061	37425646	20586	+	ENSMUSG00000016327.10	protein_coding	KI.vs.WT	yes
Gm29361	-1.45261e+16	0.007668213489262394	262000000000	0.5665134554396214	chr12	83678608	83680607	2000	-	ENSMUSG00000099708.2	lncRNA	KI.vs.WT	yes
A430035B10Rik	-1317593838025700	0.007678707557983347	263000000000	1.65834e+16	chr6	8488795	8510430	21636	-	ENSMUSG00000087305.10	lncRNA	KI.vs.WT	yes
Ppp4c	-0.41983342622135256	0.007713392239170106	265000000000	5723785043014600	chr7	126385038	126391668	6631	-	ENSMUSG00000030697.8	protein_coding	KI.vs.WT	no
Gm54655	-1.68244e+16	0.007783635865320922	267000000000	1.70868e+16	chr13	101889314	101889713	400	-	ENSMUSG00000102635.2	TEC	KI.vs.WT	yes
Zadh2	0.7224050891159272	0.007816723185487068	269000000000	4054717387315480	chr18	84106188	84115653	9466	+	ENSMUSG00000049090.4	protein_coding	KI.vs.WT	yes
Gm44675	2984725125317510	0.007816723185487068	269000000000	0.8589441103554005	chr7	91213575	91216501	2927	+	ENSMUSG00000109370.2	TEC	KI.vs.WT	yes
ENSMUSG00000120755	-2.17194e+16	0.007840313849760746	271000000000	2.44704e+16	chr15	80137850	80139163	1314	-	ENSMUSG00000120755.1	lncRNA	KI.vs.WT	yes
Serpine1	-1818412794331440	0.007852219327306864	2720000000000	4355137955487850	chr5	137090358	137101122	10765	-	ENSMUSG00000037411.11	protein_coding	KI.vs.WT	yes
Slc15a4	-0.6636775419567797	0.007852219327306864	2720000000000	6201323011347260	chr5	127672728	127709961	37234	-	ENSMUSG00000029416.18	protein_coding	KI.vs.WT	yes
B230334C09Rik	1.97161e+16	0.007859961393696501	273000000000	3977252201779540	chr3	157772823	157781749	8927	-	ENSMUSG00000104597.2	lncRNA	KI.vs.WT	yes
Gm42478	3.4015e+16	0.007859961393696501	2730000000000	0.1844700822068653	chr5	58087092	58088558	1467	+	ENSMUSG00000106337.2	TEC	KI.vs.WT	yes
Ccl3	-1.94746e+16	0.007861933083692395	2740000000000	8519185713558930	chr11	83538670	83540181	1512	-	ENSMUSG00000000982.6	protein_coding	KI.vs.WT	yes
Hjurp	-0.6330320590226942	0.007904675810451497	2760000000	5257199299201	chr1	88190193	88205355	15163	-	ENSMUSG00000044783.17	protein_coding	KI.vs.WT	yes
H2-Q5	-1.83688e+16	0.007904675810451497	27600000000	3.29239e+16	chr17	35613102	35616776	3675	+	ENSMUSG00000055413.13	protein_coding	KI.vs.WT	yes
2610011E03Rik	2.45839e+16	0.007954049768968269	278000000000	2.0214e+16	chr5	132025018	132027252	2235	-	ENSMUSG00000104936.2	TEC	KI.vs.WT	yes
Trmt61b	-1.11593e+16	0.007991005476172833	280000000000	3090765621440320	chr17	71864022	71905793	41772	-	ENSMUSG00000085492.9	lncRNA	KI.vs.WT	yes
Samd12	1317738552101340	0.007991005476172833	280000000000	2416628082883220	chr15	53317206	53765933	448728	-	ENSMUSG00000058656.14	protein_coding	KI.vs.WT	yes
Clvs1	1267123987310630	0.00799286455395867	281000000000	2.91372e+16	chr4	9269293	9451691	182399	+	ENSMUSG00000041216.16	protein_coding	KI.vs.WT	yes
D030055H07Rik	-2281637775923530	0.00799286455395867	281000000000	0.24182393657250315	chr9	106025886	106037559	11674	+	ENSMUSG00000086296.4	lncRNA	KI.vs.WT	yes
Nlrp10	1.8013e+16	0.008038671085054516	2830000000000	-0.31868372757108293	chr7	108521059	108529385	8327	-	ENSMUSG00000049709.5	protein_coding	KI.vs.WT	yes
Arid5b	-0.5298071693292846	0.008163854477378297	2890000000000	5.96053e+16	chr10	67928350	68114570	186221	-	ENSMUSG00000019947.11	protein_coding	KI.vs.WT	yes
Gm37168	-1.87891e+16	0.008163854477378297	289000000000	2910041304962060	chr1	190999301	191025888	26588	+	ENSMUSG00000103174.3	lncRNA	KI.vs.WT	yes
Bcat1	1.43242e+16	0.008189000535542865	290000000000	3.80778e+16	chr6	144939561	145021910	82350	-	ENSMUSG00000030268.18	protein_coding	KI.vs.WT	yes
Sall2	0.447141365272211	0.008211586553468845	2920000000000	5018869952898910	chr14	52548629	52566219	17591	-	ENSMUSG00000049532.12	protein_coding	KI.vs.WT	no
Gm44200	2.32208e+16	0.008211586553468845	292000000000	-0.5472680251584073	chr6	113584436	113588488	4053	+	ENSMUSG00000107937.2	lncRNA	KI.vs.WT	yes
Gm43389	1.75374e+16	0.008233274206277147	293000000000	0.407933563197794	chr5	24358292	24360886	2595	+	ENSMUSG00000106665.2	TEC	KI.vs.WT	yes
Gm45222	-0.9999139099945632	0.008233274206277147	2940000000000	5117645583989940	chr7	89795156	89799462	4307	+	ENSMUSG00000109498.2	TEC	KI.vs.WT	yes
Hmgn2	-0.5165690242751773	0.008330479823245406	297000000000	5.70238e+16	chr4	133692049	133695961	3913	-	ENSMUSG00000003038.16	protein_coding	KI.vs.WT	yes
E330034L11Rik	1922700306485830	0.008357817704521259	29900000000	2.13196e+16	chr3	95546615	95548356	1742	+	ENSMUSG00000106383.2	TEC	KI.vs.WT	yes
Gm10840	-2.01078e+16	0.008373375863913925	300000000000	1119294861244010	chr11	106051019	106051984	966	+	ENSMUSG00000075480.3	TEC	KI.vs.WT	yes
B3galt1	1.05133e+16	0.008373375863913925	3010000000000	3020528060157820	chr2	67396215	67953033	556819	+	ENSMUSG00000034780.7	protein_coding	KI.vs.WT	yes
Gm44878	-3251425026248970	0.008373375863913925	3010000000000	0.34827718085409615	chr7	4661653	4662962	1310	+	ENSMUSG00000108477.3	TEC	KI.vs.WT	yes
Gm44560	3.29459e+16	0.008388388660491922	302000000000	0.4715400988131673	chr7	58935800	58938914	3115	-	ENSMUSG00000108880.2	TEC	KI.vs.WT	yes
Gm37928	2.64681e+16	0.008425361703695849	304000000000	-0.37702564959858764	chr3	118324532	118328662	4131	+	ENSMUSG00000104362.2	TEC	KI.vs.WT	yes
Piezo1	-0.49322375965003995	0.0085269789163752	3080000000000	6.1162e+16	chr8	123208437	123278068	69632	-	ENSMUSG00000014444.18	protein_coding	KI.vs.WT	no
Slitrk5	1.4936e+16	0.008531685714490075	30800000000	3.07675e+16	chr14	111912529	111920573	8045	+	ENSMUSG00000033214.11	protein_coding	KI.vs.WT	yes
Atp2b4	0.9807517388370228	0.00856755040411156	3100000000000	443539095331629	chr1	133627195	133728779	101585	-	ENSMUSG00000026463.18	protein_coding	KI.vs.WT	yes
Nlgn3	1.1715e+16	0.008588653951519979	311000000000	2271290987490190	chrX	100342774	100369569	26796	+	ENSMUSG00000031302.17	protein_coding	KI.vs.WT	yes
Cd6	-3065868402186100	0.008611282100985029	3130000000000	-0.5315883980634566	chr19	10766705	10807422	40718	-	ENSMUSG00000024670.18	protein_coding	KI.vs.WT	yes
Ube2d3	-0.4471724510395392	0.008637689043761804	3140000000000	7766407887491610	chr3	135143910	135173959	30050	+	ENSMUSG00000078578.10	protein_coding	KI.vs.WT	no
Wipf3	0.9658616664521897	0.008658401340985758	315000000000	4.25979e+16	chr6	54406588	54480753	74166	+	ENSMUSG00000086040.9	protein_coding	KI.vs.WT	yes
ENSMUSG00000120147	-2.1487e+16	0.008681572986272897	317000000000	2363565112076100	chr11	117854486	117855166	681	+	ENSMUSG00000120147.1	lncRNA	KI.vs.WT	yes
ENSMUSG00000120665	-1584792713252590	0.008681572986272897	317000000000	1.31797e+16	chr14	61919016	61919794	779	+	ENSMUSG00000120665.1	lncRNA	KI.vs.WT	yes
Pla2g4e	2605759361448750	0.008715208384212587	319000000000	-0.3311992183886227	chr2	119996893	120075816	78924	-	ENSMUSG00000050211.15	protein_coding	KI.vs.WT	yes
Gm10101	-1.99169e+16	0.008804921423452293	3230000000000	0.0630279942627057	chr14	47066566	47069484	2919	-	ENSMUSG00000061510.4	lncRNA	KI.vs.WT	yes
Gm49502	2.60021e+16	0.008847075684690937	325000000000	0.5475495226656331	chr15	82069717	82071826	2110	+	ENSMUSG00000116226.2	TEC	KI.vs.WT	yes
Celf2	0.41510458304714437	0.008847075684690937	325000000000	813493326934676	chr2	6544505	7514374	969870	-	ENSMUSG00000002107.19	protein_coding	KI.vs.WT	no
Gm47121	2047683087677160	0.008847075684690937	3260000000000	-0.316355165747226	chr9	121971515	121972774	1260	+	ENSMUSG00000111434.2	lncRNA	KI.vs.WT	yes
Gm43843	2725233617627690	0.008847075684690937	3270000000000	0.4659850481603527	chr6	18429658	18431244	1587	-	ENSMUSG00000106944.2	TEC	KI.vs.WT	yes
Paqr9	1.87667e+16	0.008847075684690937	32700000000	1.56968e+16	chr9	95441710	95450076	8367	+	ENSMUSG00000064225.7	protein_coding	KI.vs.WT	yes
Gm4285	-1.78131e+16	0.008847075684690937	3280000000000	2.15608e+16	chr14	76080819	76082418	1600	-	ENSMUSG00000085829.3	lncRNA	KI.vs.WT	yes
9330162G02Rik	1245206884081960	0.008847075684690937	328000000000	3.74865e+16	chr7	58873595	58904536	30942	-	ENSMUSG00000109536.2	TEC	KI.vs.WT	yes
Gm32031	-1.79778e+16	0.00886452536196087	329000000000	1544890805816590	chr7	46657831	46659327	1497	+	ENSMUSG00000109118.3	lncRNA	KI.vs.WT	yes
A330074H02Rik	1.90395e+16	0.00897295096305592	333000000000	2.21352e+16	chr7	79160110	79161148	1039	+	ENSMUSG00000102995.2	TEC	KI.vs.WT	yes
Gm48565	4.18999e+16	0.008973439635257202	334000000000	-0.08582451548574174	chr9	40732265	40733969	1705	+	ENSMUSG00000110982.2	TEC	KI.vs.WT	yes
Zfp267	0.7094396109955646	0.009066119177794929	338000000000	3771511645505150	chr3	36205166	36224491	19326	+	ENSMUSG00000033883.12	protein_coding	KI.vs.WT	yes
ENSMUSG00000120667	-2768504742546490	0.00907058960747573	3390000000000	-0.08520482524274461	chr8	84924039	84924734	696	+	ENSMUSG00000120667.1	lncRNA	KI.vs.WT	yes
H4c4	-0.5793186250620636	0.009101094783620487	340000000000	5941081977732910	chr13	23765581	23766718	1138	+	ENSMUSG00000061482.8	protein_coding	KI.vs.WT	yes
ENSMUSG00000120785	-2.47582e+16	0.009118345582157236	3410000000000	0.14199098220663037	chr15	77724580	77724852	273	-	ENSMUSG00000120785.1	lncRNA	KI.vs.WT	yes
4930532G15Rik	-1.61662e+16	0.009118345582157236	342000000000	1628809762158870	chr1	185091658	185095062	3405	-	ENSMUSG00000097261.3	lncRNA	KI.vs.WT	yes
ENSMUSG00000119944	-2.08265e+16	0.009118345582157236	343000000000	1.23404e+16	chr1	86453493	86453984	492	-	ENSMUSG00000119944.1	lncRNA	KI.vs.WT	yes
Zfp941	1.86304e+16	0.009118345582157236	343000000000	0.698946197437671	chr7	140387362	140402091	14730	-	ENSMUSG00000060314.14	protein_coding	KI.vs.WT	yes
Dlx6	1.55351e+16	0.009161323275285333	345000000000	1908535475286940	chr6	6863334	6868568	5235	+	ENSMUSG00000029754.14	protein_coding	KI.vs.WT	yes
Lrrc4	0.7296110741926892	0.009165561421610971	3460000000000	3519225521868150	chr6	28661830	28831746	169917	-	ENSMUSG00000049939.7	protein_coding	KI.vs.WT	yes
Klk8	-0.5159621223005031	0.009249802271922446	3500000000000	46303158580903	chr7	43447001	43453250	6250	+	ENSMUSG00000064023.5	protein_coding	KI.vs.WT	yes
4930570G19Rik	2045384357972810	0.009249802271922446	3500000000000	1.43575e+16	chr3	156194144	156267396	73253	-	ENSMUSG00000085084.9	lncRNA	KI.vs.WT	yes
Gm47494	354019657563509	0.009272309473656322	351000000000	-0.21438243878221164	chr13	11833134	11836620	3487	-	ENSMUSG00000113269.2	TEC	KI.vs.WT	yes
Cyp2s1	2.24212e+16	0.009274394212726562	3520000000000	-0.19519617479566595	chr7	25501900	25516338	14439	-	ENSMUSG00000040703.12	protein_coding	KI.vs.WT	yes
Blnk	-0.4346362134220763	0.009315552818482663	3540000000000	7032080861527580	chr19	40917371	40982978	65608	-	ENSMUSG00000061132.14	protein_coding	KI.vs.WT	no
Gm37542	-2731116612342740	0.009315552818482663	355000000000	0.15288518168613713	chr1	182735275	182738106	2832	+	ENSMUSG00000102291.2	TEC	KI.vs.WT	yes
Gmip	-0.4218797702181833	0.009315552818482663	355000000000	6948365423400260	chr8	70261329	70274520	13192	+	ENSMUSG00000036246.15	protein_coding	KI.vs.WT	no
Gm26691	2.83496e+16	0.009320161763270348	356000000000	-0.5229834592269988	chr3	133536429	133946402	409974	-	ENSMUSG00000097911.3	lncRNA	KI.vs.WT	yes
Gm43847	1.73714e+16	0.009366049014626749	3580000000000	2.2668e+16	chr3	105410223	105412162	1940	+	ENSMUSG00000105753.2	lncRNA	KI.vs.WT	yes
ENSMUSG00000120045	-2.1135e+16	0.009366049014626749	3590000000000	1.40406e+16	chr11	50216704	50218525	1822	+	ENSMUSG00000120045.1	lncRNA	KI.vs.WT	yes
Gm37084	-1.41546e+16	0.009368147366100322	3590000000000	5036674865604610	chr1	131013989	131019886	5898	-	ENSMUSG00000102856.2	TEC	KI.vs.WT	yes
ENSMUSG00000120095	-2.79632e+16	0.009458017588167424	363000000000	0.3591570593047815	chr8	85391725	85396050	4326	+	ENSMUSG00000120095.1	lncRNA	KI.vs.WT	yes
Gm38157	-1.33572e+16	0.009504124249435066	365000000000	2.4519e+16	chr1	34071181	34072878	1698	+	ENSMUSG00000103364.2	TEC	KI.vs.WT	yes
Pik3cd	-0.37033533599372764	0.009532088619018405	367000000000	7549289964038790	chr4	149733625	149787028	53404	-	ENSMUSG00000039936.19	protein_coding	KI.vs.WT	no
Pbx1	0.8482770528467121	0.009646012389063662	372000000000	6401165016965320	chr1	167946933	168259839	312907	-	ENSMUSG00000052534.16	protein_coding	KI.vs.WT	yes
Gm35501	2.29002e+16	0.009684200128322754	37400000000	0.3106279235301158	chr9	122515864	122522707	6844	+	ENSMUSG00000111068.2	lncRNA	KI.vs.WT	yes
Gm48261	2.32202e+16	0.009709207929126627	377000000000	2507286292943320	chr13	8332284	8336139	3856	+	ENSMUSG00000113073.2	TEC	KI.vs.WT	yes
9430060I03Rik	-2.30909e+16	0.009709207929126627	377000000000	0.3033000296812212	chr1	92861248	92878312	17065	-	ENSMUSG00000100632.2	lncRNA	KI.vs.WT	yes
Arvcf	-0.5263853525977233	0.009709207929126627	3770000000000	571904202639961	chr16	18166046	18225826	59781	+	ENSMUSG00000118669.2	protein_coding	KI.vs.WT	yes
Gm55118	-1.28971e+16	0.009709207929126627	378000000000	2877217115157420	chr16	10961989	10962045	57	+	ENSMUSG00002076173.1	miRNA	KI.vs.WT	yes
Ier3	-2.00655e+16	0.009709207929126627	3780000000000	613525032729747	chr17	36132576	36133815	1240	+	ENSMUSG00000003541.7	protein_coding	KI.vs.WT	yes
Rnu12	-0.9005819499086567	0.009742265934708387	380000000000	3.17964e+16	chr15	83033845	83033995	151	+	ENSMUSG00000065176.3	snRNA	KI.vs.WT	yes
A130071D04Rik	-1.33031e+16	0.009795150812069197	3820000000000	4344254564837210	chr1	138089558	138095421	5864	-	ENSMUSG00000104291.2	TEC	KI.vs.WT	yes
Zcchc9-ps	2148041666869090	0.009822791563996914	3840000000000	0.11583841266168322	chr2	140969200	140969985	786	+	ENSMUSG00000083274.2	processed_pseudogene	KI.vs.WT	yes
Nsg2	0.9066050197801727	0.009832093417646572	385000000000	4232805417676940	chr11	31950463	32009202	58740	+	ENSMUSG00000020297.11	protein_coding	KI.vs.WT	yes
Kcnh7	1.27395e+16	0.009832093417646572	3860000000000	428731413169252	chr2	62523758	63014631	490874	-	ENSMUSG00000059742.11	protein_coding	KI.vs.WT	yes
Eif4a2	-0.5113440664196819	0.009832093417646572	3860000000000	7620247370874100	chr16	22926194	22932886	6693	+	ENSMUSG00000022884.17	protein_coding	KI.vs.WT	yes
Csrnp1	-1882770629698410	0.009842958428430418	3870000000000	5564940590958310	chr9	119800229	119813724	13496	-	ENSMUSG00000032515.9	protein_coding	KI.vs.WT	yes
Osm	-1.73772e+16	0.009866360644229898	3880000000000	5334358462742690	chr11	4186420	4191026	4607	+	ENSMUSG00000058755.4	protein_coding	KI.vs.WT	yes
Dnajb9	-0.6090906915859491	0.00987292159782751	390000000000	6258758451310170	chr12	44252342	44257109	4768	-	ENSMUSG00000014905.5	protein_coding	KI.vs.WT	yes
Slc38a2	-0.5684371440042576	0.00987292159782751	3900000000000	7171716537107310	chr15	96585273	96597611	12339	-	ENSMUSG00000022462.8	protein_coding	KI.vs.WT	yes
4930432B10Rik	-1.75277e+16	0.00987292159782751	3900000000000	1.37866e+16	chr10	11120534	11156965	36432	-	ENSMUSG00000097007.4	lncRNA	KI.vs.WT	yes
Upp2	1.055e+16	0.00987292159782751	391000000000	2615844096690580	chr2	58457310	58682983	225674	+	ENSMUSG00000026839.18	protein_coding	KI.vs.WT	yes
Fgf12	0.7470084147020453	0.0098801316948236	3920000000000	4654214171427420	chr16	27978850	28571820	592971	-	ENSMUSG00000022523.11	protein_coding	KI.vs.WT	yes
Gm44797	2.14838e+16	0.009974505110288662	3960000000000	2428698244273150	chr8	9645109	9646945	1837	-	ENSMUSG00000109359.2	TEC	KI.vs.WT	yes
5730455P16Rik	0.45201627100711306	0.009974505110288662	396000000000	4420729994903670	chr11	80251318	80268860	17543	-	ENSMUSG00000057181.16	protein_coding	KI.vs.WT	no
Gm47196	-3.11341e+16	0.009988899121302066	398000000000	-0.4444671753370958	chr12	99605975	99608183	2209	-	ENSMUSG00000113012.2	TEC	KI.vs.WT	yes
Mir7663	-2317138859010250	0.010010411842323666	3990000000000	-0.7212676269909772	chr10	22605271	22605331	61	-	ENSMUSG00000098714.3	miRNA	KI.vs.WT	yes
Traf5	-0.5319800324533887	0.01003505173618644	401000000000	4588734168122940	chr1	191729166	191776868	47703	-	ENSMUSG00000026637.15	protein_coding	KI.vs.WT	yes
Plcxd3	1.87999e+16	0.010064025806736815	4020000000000	0.5069577799384267	chr15	4404973	4605035	200063	+	ENSMUSG00000049148.9	protein_coding	KI.vs.WT	yes
Gm37745	2.24048e+16	0.010066679858794284	403000000000	0.6392785141176867	chr1	119718493	119726655	8163	-	ENSMUSG00000103146.2	TEC	KI.vs.WT	yes
Ttc3	0.5190693230617046	0.010066679858794284	403000000000	7581435055921340	chr16	94171477	94270202	98726	+	ENSMUSG00000040785.20	protein_coding	KI.vs.WT	yes
ENSMUSG00000120024	-1.1777e+16	0.010167703388898275	408000000000	3.49588e+16	chr11	83539329	83541209	1881	+	ENSMUSG00000120024.1	lncRNA	KI.vs.WT	yes
Akna	-0.47503814341441003	0.010247911797198342	412000000000	7597519374437670	chr4	63285362	63321591	36230	-	ENSMUSG00000039158.12	protein_coding	KI.vs.WT	no
Gm47257	-3263403152006760	0.010250563971951194	4130000000000	-0.42750574065262187	chr10	62438129	62439907	1779	+	ENSMUSG00000112347.2	lncRNA	KI.vs.WT	yes
Lcp2	-0.4248054208757784	0.010250563971951194	4140000000000	7263454543646320	chr11	33996920	34042295	45376	+	ENSMUSG00000002699.14	protein_coding	KI.vs.WT	no
E230029C05Rik	-0.6967076720380703	0.010250563971951194	41400000000	6007962202523670	chr7	89629906	89717979	88074	+	ENSMUSG00000097585.4	lncRNA	KI.vs.WT	yes
Rbpms	-1.00516e+16	0.01027337966089964	0.00041519656589173994	3.76853e+16	chr8	34272671	34419891	147221	-	ENSMUSG00000031586.18	protein_coding	KI.vs.WT	yes
Cd300c2	-0.3576667525235717	0.010332901298029223	418000000000	6.87864e+16	chr11	114887547	114895058	7512	-	ENSMUSG00000044811.15	protein_coding	KI.vs.WT	no
Trib1	-1.14382e+16	0.010360001211112468	421000000000	6597010922327530	chr15	59520199	59528948	8750	+	ENSMUSG00000032501.10	protein_coding	KI.vs.WT	yes
Bicra	-0.37153754729881705	0.010360001211112468	42100000000	5.83198e+16	chr7	15704597	15781846	77250	-	ENSMUSG00000070808.5	protein_coding	KI.vs.WT	no
Cdkl5	0.976847855367857	0.010360001211112468	421000000000	4.02822e+16	chrX	159554919	159777700	222782	-	ENSMUSG00000031292.15	protein_coding	KI.vs.WT	yes
ENSMUSG00000121051	-0.931434130274078	0.01042652219032953	424000000000	3223901466467670	chr7	89679253	89679586	334	+	ENSMUSG00000121051.1	lncRNA	KI.vs.WT	yes
ENSMUSG00000120588	-273760333862959	0.010464918377301733	4260000000000	-0.04079854490304141	chr3	121084611	121085257	647	-	ENSMUSG00000120588.1	lncRNA	KI.vs.WT	yes
Ppm1e	0.7615839963668942	0.010478176868048271	4280000000000	5919095868802510	chr11	87117732	87249849	132118	-	ENSMUSG00000046442.5	protein_coding	KI.vs.WT	yes
Gm43876	3386734514812800	0.010478176868048271	428000000000	-0.24956915460453546	chr6	45506017	45509245	3229	+	ENSMUSG00000108055.2	TEC	KI.vs.WT	yes
1810044D09Rik	-1772747242710790	0.010478176868048271	429000000000	-0.5158690909799537	chr6	91417925	91418739	815	+	ENSMUSG00000100680.3	lncRNA	KI.vs.WT	yes
ENSMUSG00000120692	-2151241302715480	0.010478176868048271	430000000000	2639894888115750	chr8	73022455	73022931	477	+	ENSMUSG00000120692.1	lncRNA	KI.vs.WT	yes
Gm37534	1228067281707270	0.010478176868048271	4300000000000	2.80094e+16	chr1	137877160	137882381	5222	+	ENSMUSG00000103427.2	TEC	KI.vs.WT	yes
Gm20337	-2.33733e+16	0.010526031434207767	432000000000	-0.2545446152513893	chr12	80988323	80992173	3851	-	ENSMUSG00000112880.3	lncRNA	KI.vs.WT	yes
B930059L03Rik	-1802021068103210	0.010555859891316964	434000000000	2128068092109220	chr12	110556946	110559134	2189	+	ENSMUSG00000113361.2	lncRNA	KI.vs.WT	yes
ENSMUSG00000120191	-1.56403e+16	0.010560776798032146	4350000000000	1.77482e+16	chr7	16133534	16134828	1295	+	ENSMUSG00000120191.1	lncRNA	KI.vs.WT	yes
Gm4258	1424131324139160	0.01056964345530856	4370000000000	1.81983e+16	chr1	137826327	137937516	111190	+	ENSMUSG00000098243.5	lncRNA	KI.vs.WT	yes
Ddx50	-0.43708181230848053	0.01056964345530856	4370000000000	60063703933075	chr10	62451674	62486997	35324	-	ENSMUSG00000020076.8	protein_coding	KI.vs.WT	no
ENSMUSG00000121105	-2097953469976750	0.01056964345530856	4370000000000	1.41955e+16	chr17	71159102	71159246	145	-	ENSMUSG00000121105.1	lncRNA	KI.vs.WT	yes
Kcnq1ot1	1.45081e+16	0.010593979374954373	4390000000000	6957222847602410	chr7	142757195	142850286	93092	-	ENSMUSG00000101609.3	lncRNA	KI.vs.WT	yes
Agmo	-0.5705598239913399	0.010593979374954373	439000000000	5824997063765750	chr12	37291640	37632201	340562	+	ENSMUSG00000050103.19	protein_coding	KI.vs.WT	yes
Gm42942	2803305483780160	0.010725971738786103	4460000000000	0.4106982510828817	chr3	156409537	156410864	1328	+	ENSMUSG00000106047.2	TEC	KI.vs.WT	yes
Gm26549	-1.51197e+16	0.010780714013616346	4480000000000	210657636250884	chr17	32503761	32517663	13903	+	ENSMUSG00000097217.4	lncRNA	KI.vs.WT	yes
Crem	-0.8511197137987587	0.010823159355659523	451000000000	3.34365e+16	chr18	3266048	3337748	71701	-	ENSMUSG00000063889.17	protein_coding	KI.vs.WT	yes
Egr2	-1.45235e+16	0.010853317182251293	454000000000	5.63529e+16	chr10	67371305	67378018	6714	+	ENSMUSG00000037868.16	protein_coding	KI.vs.WT	yes
6430571L13Rik	1624975590571200	0.010853317182251293	454000000000	2.67594e+16	chr9	107217801	107229621	11821	+	ENSMUSG00000037977.7	protein_coding	KI.vs.WT	yes
Sh2d6	-2.27008e+16	0.010853317182251293	454000000000	0.8002131375368076	chr6	72490624	72498690	8067	-	ENSMUSG00000052631.16	protein_coding	KI.vs.WT	yes
Rims3	0.9124540511908397	0.010853317182251293	4550000000000	3486548930686180	chr4	120712013	120753776	41764	+	ENSMUSG00000032890.18	protein_coding	KI.vs.WT	yes
Gm5129	-1894977253766820	0.010853317182251293	455000000000	1.98216e+16	chr5	29940332	29940934	603	-	ENSMUSG00000053121.5	lncRNA	KI.vs.WT	yes
Pnrc2	-0.41596228595103263	0.01095633369560504	461000000000	6032320596721270	chr4	135598229	135601161	2933	-	ENSMUSG00000028675.13	protein_coding	KI.vs.WT	no
Skil	-0.5651488051590885	0.01095633369560504	4610000000000	9056145418399530	chr3	31149207	31176726	27520	+	ENSMUSG00000027660.17	protein_coding	KI.vs.WT	yes
Yrdc	-1.06261e+16	0.01095633369560504	461000000000	3283496922195420	chr4	124744472	124749035	4564	+	ENSMUSG00000028889.18	protein_coding	KI.vs.WT	yes
2610044O15Rik8	0.8275732813719959	0.010993772551661483	46300000000	3.18066e+16	chr8	129942835	129960887	18053	-	ENSMUSG00000071302.11	protein_coding	KI.vs.WT	yes
4933417C20Rik	-2.39084e+16	0.01103119472862126	466000000000	0.8738393039199946	chr1	160040513	160042386	1874	+	ENSMUSG00000103006.2	TEC	KI.vs.WT	yes
Kndc1	11468074899566	0.011032251377938791	4660000000000	2260811936887270	chr7	139474612	139521450	46839	+	ENSMUSG00000066129.18	protein_coding	KI.vs.WT	yes
Dlx6os1	1586443213298160	0.011047561664720266	468000000000	4883912853181330	chr6	6749740	6871632	121893	-	ENSMUSG00000090063.8	lncRNA	KI.vs.WT	yes
Gm16576	-0.7461342963739258	0.011047721302310187	468000000000	3440925270931760	chr15	79626899	79641595	14697	+	ENSMUSG00000087543.2	lncRNA	KI.vs.WT	yes
Ccdc88a	0.5435015214942421	0.01107398971887046	4700000000000	6459145642868280	chr11	29323658	29460808	137151	+	ENSMUSG00000032740.18	protein_coding	KI.vs.WT	yes
Gm42602	-0.9262814525954036	0.01107398971887046	471000000000	2.15095e+16	chr5	97027377	97030600	3224	+	ENSMUSG00000104698.2	TEC	KI.vs.WT	yes
Tuba1c	-1.1489e+16	0.011093458388278079	472000000000	3725464305560400	chr15	98927772	98935991	8220	+	ENSMUSG00000043091.10	protein_coding	KI.vs.WT	yes
ENSMUSG00000121184	1.14069e+16	0.011173489793693626	4760000000000	2.69074e+16	chr11	100912248	100914068	1821	+	ENSMUSG00000121184.1	lncRNA	KI.vs.WT	yes
Gm43879	3.63595e+16	0.011180798500193169	4770000000000	0.3108391336838457	chr6	45057680	45061439	3760	+	ENSMUSG00000107858.2	TEC	KI.vs.WT	yes
Gm44799	1.70433e+16	0.011180798500193169	478000000000	2608165628875870	chr8	9708248	9709449	1202	-	ENSMUSG00000109095.2	TEC	KI.vs.WT	yes
Gm12366	-1696928470930680	0.011204719860189912	479000000000	0.310124461628815	chr4	35202103	35202975	873	-	ENSMUSG00000082762.2	processed_pseudogene	KI.vs.WT	yes
Arrb2	-0.39739591259114027	0.011319982182426245	4850000000000	733208912122705	chr11	70323461	70331654	8194	+	ENSMUSG00000060216.16	protein_coding	KI.vs.WT	no
Tgif1	-1.6328e+16	0.011335062539500956	486000000000	6510286148909000	chr17	71151200	71160541	9342	-	ENSMUSG00000047407.18	protein_coding	KI.vs.WT	yes
Lpl	0.7660181777145759	0.01137639852979444	48800000000	5462131819750460	chr8	69333143	69360100	26958	+	ENSMUSG00000015568.17	protein_coding	KI.vs.WT	yes
Ankrd33b	0.9550459399413851	0.011533352237683482	496000000000	3.69295e+16	chr15	31291624	31367872	76249	-	ENSMUSG00000022237.18	protein_coding	KI.vs.WT	yes
Rasal2	0.40374054461358494	0.011533352237683482	497000000000	5901595425662180	chr1	156962752	157240165	277414	-	ENSMUSG00000070565.12	protein_coding	KI.vs.WT	no
Mterf2	1797584255445080	0.011573756251044866	4990000000	0.6968751053968576	chr10	84955297	84963891	8595	-	ENSMUSG00000049038.4	protein_coding	KI.vs.WT	yes
Gm10382	-1.64147e+16	0.011594906012967483	500000000000	2641267502536830	chr5	125466386	125467619	1234	+	ENSMUSG00000072612.4	lncRNA	KI.vs.WT	yes
Kcnj6	1453798191000050	0.011675864357250914	50500000000	3442123799035990	chr16	94549495	94798560	249066	-	ENSMUSG00000043301.17	protein_coding	KI.vs.WT	yes
Ap5s1	-0.8428253349457967	0.011675864357250914	505000000000	3368278228567060	chr2	131048998	131055434	6437	+	ENSMUSG00000068264.12	protein_coding	KI.vs.WT	yes
Pak5	1.60714e+16	0.011693069603076832	507000000000	1.67197e+16	chr2	135923024	136229887	306864	-	ENSMUSG00000039913.13	protein_coding	KI.vs.WT	yes
Gm43920	2.08286e+16	0.011704909355920024	508000000000	-0.10656775882583437	chr6	83939259	83942030	2772	+	ENSMUSG00000107534.2	lncRNA	KI.vs.WT	yes
Rilpl2	-1.37672e+16	0.011711800525364332	50900000000	4335271728271160	chr5	124601328	124616429	15102	-	ENSMUSG00000029401.9	protein_coding	KI.vs.WT	yes
Nrip3	0.6610785991000832	0.011787947318088314	51300000000	4754319319197590	chr7	109357262	109381232	23971	-	ENSMUSG00000034825.15	protein_coding	KI.vs.WT	yes
Pcdh9	1.43485e+16	0.011799818647852628	514000000000	4720934971921770	chr14	93250846	94128115	877270	-	ENSMUSG00000055421.9	protein_coding	KI.vs.WT	yes
Mapk6	-0.8172644548782234	0.011799818647852628	515000000000	5741670881665190	chr9	75276344	75317287	40944	-	ENSMUSG00000042688.17	protein_coding	KI.vs.WT	yes
Gm47075	2.28861e+16	0.01187134618735138	518000000000	0.8904143350700953	chr13	93448549	93450563	2015	+	ENSMUSG00000114169.2	TEC	KI.vs.WT	yes
Pnma8c	1.07462e+16	0.011875880297719289	519000000000	3024540548409350	chr7	16717011	16722077	5067	+	ENSMUSG00000108348.3	protein_coding	KI.vs.WT	yes
Crabp2	1.98656e+16	0.01189852662840835	521000000000	-0.8226744078634984	chr3	87855973	87860683	4711	+	ENSMUSG00000004885.6	protein_coding	KI.vs.WT	yes
Rragb	1219123204706290	0.011901941847138813	522000000000	1.57377e+16	chrX	151922977	151954939	31963	+	ENSMUSG00000041658.13	protein_coding	KI.vs.WT	yes
Gm29367	-1366571083019010	0.011926237777424874	523000000000	1.51517e+16	chr4	141603018	141604344	1327	+	ENSMUSG00000100396.2	lncRNA	KI.vs.WT	yes
Maff	-2.1001e+16	0.011967410150508633	526000000000	4812464014560570	chr15	79230821	79243276	12456	+	ENSMUSG00000042622.15	protein_coding	KI.vs.WT	yes
Lcmt2	-0.7492878678512328	0.012017908310951236	529000000000	3166820004246110	chr2	120958788	120971134	12347	-	ENSMUSG00000074890.5	protein_coding	KI.vs.WT	yes
Gm42583	2305004755425720	0.01203740658606859	530000000000	4010429563339120	chr6	21258920	21265619	6700	+	ENSMUSG00000106826.2	TEC	KI.vs.WT	yes
Tmod1	0.9503366355707775	0.012060897879291018	532000000000	4.35729e+16	chr4	46038935	46116032	77098	+	ENSMUSG00000028328.14	protein_coding	KI.vs.WT	yes
Gm43176	2.42493e+16	0.012076961456844231	53400000000	-0.03795528673468218	chr5	52296927	52299915	2989	-	ENSMUSG00000106648.2	TEC	KI.vs.WT	yes
H2-Ob	-0.5539840481240784	0.012076961456844231	53400000000	4.16202e+16	chr17	34457877	34473388	15512	+	ENSMUSG00000041538.17	protein_coding	KI.vs.WT	yes
Tob2	-1.06908e+16	0.012087130868352428	535000000000	650531643518097	chr15	81732473	81742997	10525	-	ENSMUSG00000048546.9	protein_coding	KI.vs.WT	yes
Gm36955	1.93585e+16	0.01210362108867369	537000000000	0.5776723850782282	chr1	54557769	54559429	1661	-	ENSMUSG00000104136.2	TEC	KI.vs.WT	yes
Gm31645	-2.13451e+16	0.01210362108867369	538000000000	0.4693847328553541	chr17	74826654	74835115	8462	-	ENSMUSG00000117358.3	lncRNA	KI.vs.WT	yes
Rela	-0.44143724567094716	0.01210362108867369	538000000000	6449898484712950	chr19	5687511	5698158	10648	+	ENSMUSG00000024927.9	protein_coding	KI.vs.WT	no
Snrnp35	-0.8050098205116267	0.012121901595043139	540000000000	2832162930617340	chr5	124621197	124629187	7991	+	ENSMUSG00000029402.9	protein_coding	KI.vs.WT	yes
Jakmip2	1.31703e+16	0.01224881355327483	546000000000	4113602962770680	chr18	43664472	43820838	156367	-	ENSMUSG00000024502.11	protein_coding	KI.vs.WT	yes
Gm7008	-1.55225e+16	0.01224881355327483	547000000000	1286720666165650	chr12	40272757	40279183	6427	+	ENSMUSG00000035983.5	lncRNA	KI.vs.WT	yes
Col27a1	-0.5656854973817093	0.01226434408308388	548000000000	6674684511286190	chr4	63132241	63253228	120988	+	ENSMUSG00000045672.16	protein_coding	KI.vs.WT	yes
Dlst	-0.36396987782071705	0.012315822118782686	551000000000	653310358146442	chr12	85157607	85181619	24013	+	ENSMUSG00000004789.11	protein_coding	KI.vs.WT	no
Hhip	1.51196e+16	0.012485643883057885	559000000000	-0.036410450873602215	chr8	80692480	80784635	92156	-	ENSMUSG00000064325.5	protein_coding	KI.vs.WT	yes
Siah2	-1.02474e+16	0.012529959879238996	562000000000	3.89901e+16	chr3	58582359	58599821	17463	-	ENSMUSG00000036432.9	protein_coding	KI.vs.WT	yes
Kcnh5	1337935279517570	0.012584013075704474	56500000000	3.55771e+16	chr12	74943994	75224106	280113	-	ENSMUSG00000034402.4	protein_coding	KI.vs.WT	yes
Map9	1.05584e+16	0.012883219667229013	579000000000	3377772135011290	chr3	82265351	82302575	37225	+	ENSMUSG00000033900.14	protein_coding	KI.vs.WT	yes
Ube2j2	-0.43876451373905007	0.012932417388270976	582000000000	4300101960066670	chr4	156028288	156044061	15774	+	ENSMUSG00000023286.17	protein_coding	KI.vs.WT	no
Ankrd29	1.03464e+16	0.012932417388270976	583000000000	236270141488371	chr18	12385419	12438854	53436	-	ENSMUSG00000057766.15	protein_coding	KI.vs.WT	yes
ENSMUSG00000120480	-301859826778264	0.012989168098538248	586000000000	-0.2852000105974025	chr11	69310174	69311202	1029	-	ENSMUSG00000120480.1	lncRNA	KI.vs.WT	yes
ENSMUSG00000120916	-1.79512e+16	0.0129968463848875	588000000000	1.0352e+16	chr9	45156949	45157474	526	-	ENSMUSG00000120916.1	lncRNA	KI.vs.WT	yes
Irf5	-0.46868388299500885	0.0129968463848875	588000000000	7574777779995520	chr6	29526624	29541870	15247	+	ENSMUSG00000029771.13	protein_coding	KI.vs.WT	no
Gm26652	3.18165e+16	0.0129968463848875	589000000000	-0.350405047535204	chrX	19068635	19104128	35494	-	ENSMUSG00000097497.3	lncRNA	KI.vs.WT	yes
Klf4	-1991303155123620	0.013090042926259749	594000000000	655379656716573	chr4	55527143	55532466	5324	-	ENSMUSG00000003032.9	protein_coding	KI.vs.WT	yes
9330159F19Rik	1391845647505670	0.01322114455297959	600000000000	2878757055587120	chr10	29087602	29106775	19174	+	ENSMUSG00000004360.10	protein_coding	KI.vs.WT	yes
Pclo	1.00483e+16	0.013223403227922492	601000000000	641668434915793	chr5	14564932	14913473	348542	+	ENSMUSG00000061601.16	protein_coding	KI.vs.WT	yes
ENSMUSG00000120353	-2.60706e+16	0.013269235050696727	604000000000	-0.11721118028936806	chr18	84607916	84614997	7082	+	ENSMUSG00000120353.1	lncRNA	KI.vs.WT	yes
Epb41l4b	1.16259e+16	0.013332560697696338	60800000000	2097529096203760	chr4	56991972	57143437	151466	-	ENSMUSG00000028434.13	protein_coding	KI.vs.WT	yes
Vstm5	2.82851e+16	0.013332560697696338	609000000000	-0.40136797921207074	chr9	15150341	15170712	20372	+	ENSMUSG00000031937.8	protein_coding	KI.vs.WT	yes
Zbed5-ps	-1279770759860000	0.013332560697696338	60900000000	1622083950588860	chr7	110682271	110721911	39641	-	ENSMUSG00000110424.3	lncRNA	KI.vs.WT	yes
Gm10425	-1.86925e+16	0.013404345917485861	613000000000	0.8002097857194539	chr12	111393308	111397380	4073	-	ENSMUSG00000097081.2	lncRNA	KI.vs.WT	yes
Gm42992	2.42804e+16	0.013426181230032664	61600000000	3800910850812800	chr5	132015388	132022223	6836	-	ENSMUSG00000106320.2	TEC	KI.vs.WT	yes
9230116N13Rik	-1.29533e+16	0.013426181230032664	6160000000	1.09608e+16	chr1	136339654	136343257	3604	-	ENSMUSG00000097403.3	lncRNA	KI.vs.WT	yes
Ifrd1	-1.61802e+16	0.013426181230032664	61600000000	6791500943190530	chr12	40251566	40298503	46938	-	ENSMUSG00000001627.13	protein_coding	KI.vs.WT	yes
Opcml	0.9896441216507342	0.01346968107926718	619000000000	3.86396e+16	chr9	27702071	28836706	1134636	+	ENSMUSG00000062257.14	protein_coding	KI.vs.WT	yes
Cxcl1	-1.85401e+16	0.013594821909305303	626000000000	0.2681350034430398	chr5	91039100	91040974	1875	+	ENSMUSG00000029380.12	protein_coding	KI.vs.WT	yes
Klhl1	2009425128944830	0.013673785785176362	630000000000	1.19977e+16	chr14	96340172	96756538	416367	-	ENSMUSG00000022076.11	protein_coding	KI.vs.WT	yes
Mrtfb	0.7504445234964715	0.013731130191673926	63300000000	5886427076551010	chr16	13074345	13235393	161049	+	ENSMUSG00000009569.15	protein_coding	KI.vs.WT	yes
Zfp287	0.8854774507554777	0.013775644862850697	63600000000	2.86456e+16	chr11	62591182	62622731	31550	-	ENSMUSG00000005267.14	protein_coding	KI.vs.WT	yes
2700046G09Rik	-1.39068e+16	0.013862119651996779	641000000000	2269134928234860	chr19	32366591	32368705	2115	+	ENSMUSG00000097787.4	lncRNA	KI.vs.WT	yes
Rrp8	-0.5399318164539888	0.013874778444408058	64200000000	3774887232077150	chr7	105380937	105386592	5656	-	ENSMUSG00000030888.15	protein_coding	KI.vs.WT	yes
Gm49463	-1.30817e+16	0.013897085345951472	644000000000	1.35602e+16	chr15	83056521	83059009	2489	+	ENSMUSG00000116508.3	lncRNA	KI.vs.WT	yes
Hnrnpk	-0.3733161393100026	0.01396947742085745	649000000000	8858635077613320	chr13	58538956	58551157	12202	-	ENSMUSG00000021546.19	protein_coding	KI.vs.WT	no
ENSMUSG00000120134	-1.40301e+16	0.01396947742085745	650000000000	3.5268e+16	chr17	81238709	81240971	2263	-	ENSMUSG00000120134.1	lncRNA	KI.vs.WT	yes
Gm10603	-1.46866e+16	0.01396947742085745	650000000000	1.06308e+16	chr7	100095944	100124053	28110	-	ENSMUSG00000099137.2	lncRNA	KI.vs.WT	yes
ENSMUSG00000120783	-2115931078224010	0.01396947742085745	65100000000	0.3437120342852994	chr15	82030511	82031260	750	-	ENSMUSG00000120783.1	lncRNA	KI.vs.WT	yes
Upf3a	-0.3784150798201757	0.014017029987793287	654000000000	5057448200150100	chr8	13835615	13849193	13579	+	ENSMUSG00000038398.9	protein_coding	KI.vs.WT	no
Mdm2	-0.39123454247234357	0.014017029987793287	654000000	5782863414403500	chr10	117524780	117546663	21884	-	ENSMUSG00000020184.16	protein_coding	KI.vs.WT	no
Ccdc187	2.16135e+16	0.014098688516038424	66000000000	0.6191313726554004	chr2	26133481	26184569	51089	-	ENSMUSG00000048038.9	protein_coding	KI.vs.WT	yes
Sertad4	1490691275447360	0.014098688516038424	660000000000	1.38746e+16	chr1	192526796	192538064	11269	-	ENSMUSG00000016262.15	protein_coding	KI.vs.WT	yes
E230020D15Rik	1750044690753110	0.014098688516038424	661000000000	0.8723566690448697	chr8	8679175	8685073	5899	-	ENSMUSG00000108912.2	TEC	KI.vs.WT	yes
Gm16096	-2.54092e+16	0.014142841632024509	664000000000	-0.2669272729222774	chr9	40692038	40695477	3440	-	ENSMUSG00000087135.8	lncRNA	KI.vs.WT	yes
Gm45159	2.48216e+16	0.014151658052926825	665000000000	3.51071e+16	chr7	90536280	90589260	52981	+	ENSMUSG00000109125.2	lncRNA	KI.vs.WT	yes
ENSMUSG00000121024	-1.81008e+16	0.014151898297241122	66600000000	1.16604e+16	chr7	45170073	45171474	1402	-	ENSMUSG00000121024.1	lncRNA	KI.vs.WT	yes
St8sia3	1425975889836810	0.01416205260322133	667000000000	1.99487e+16	chr18	64387430	64412682	25253	+	ENSMUSG00000056812.15	protein_coding	KI.vs.WT	yes
Gm31024	-1.71242e+16	0.01418075554501427	66800000000	1819973873768220	chr7	27866700	27869052	2353	-	ENSMUSG00000109015.2	TEC	KI.vs.WT	yes
Mir7-1	-2.22694e+16	0.01418880327952864	670000000000	-0.41764385202007465	chr13	58540593	58540700	108	-	ENSMUSG00000065434.3	miRNA	KI.vs.WT	yes
Nfkbid	-2102268844090410	0.014188898589220724	670000000000	6799480621082600	chr7	30121157	30128171	7015	+	ENSMUSG00000036931.16	protein_coding	KI.vs.WT	yes
Rbm38	-0.8160757725621485	0.014221403497349176	673000000000	3.73419e+16	chr2	172862291	172876527	14237	+	ENSMUSG00000027510.18	protein_coding	KI.vs.WT	yes
E030042O20Rik	-1.40752e+16	0.014232138291537256	674000000000	3.26584e+16	chr2	75535114	75546239	11126	+	ENSMUSG00000087222.3	lncRNA	KI.vs.WT	yes
H2-K1	-1.03509e+16	0.014314990829206876	679000000000	822228443051361	chr17	34214991	34219321	4331	-	ENSMUSG00000061232.17	protein_coding	KI.vs.WT	yes
Gm18991	3.52537e+16	0.014322980388393185	680000000000	0.017362937085186683	chr8	11788621	11789366	746	+	ENSMUSG00000110394.2	processed_pseudogene	KI.vs.WT	yes
ENSMUSG00000120979	2417629332627290	0.014347624883980814	682000000000	0.23415909051654205	chr15	76405109	76409078	3970	+	ENSMUSG00000120979.1	lncRNA	KI.vs.WT	yes
Gm37036	2.69374e+16	0.014442934561454226	687000000000	-0.09359996028352008	chr1	91947314	91949819	2506	-	ENSMUSG00000102565.2	TEC	KI.vs.WT	yes
Gm11653	1.29488e+16	0.014480170017508077	690000000000	2348343283838920	chr11	105766731	105767739	1009	+	ENSMUSG00000081270.2	processed_pseudogene	KI.vs.WT	yes
ENSMUSG00000120360	2142897743901040	0.01448554655186881	691000000000	-0.004764544297592291	chr5	146585212	146592421	7210	-	ENSMUSG00000120360.1	lncRNA	KI.vs.WT	yes
Hyal1	-1.83816e+16	0.014505006709323342	693000000000	0.6936463463892095	chr9	107454126	107458909	4784	+	ENSMUSG00000010051.16	protein_coding	KI.vs.WT	yes
Ano3	1.39041e+16	0.01451530518240288	694000000000	330188696220865	chr2	110485546	110781268	295723	-	ENSMUSG00000074968.12	protein_coding	KI.vs.WT	yes
Gm37967	2.45455e+16	0.01451530518240288	695000000000	-0.07431024525630903	chr1	86845714	86848378	2665	+	ENSMUSG00000102571.2	TEC	KI.vs.WT	yes
Ankrd63	1.34385e+16	0.014550058774210726	697000000000	2.14213e+16	chr2	118529584	118534444	4861	-	ENSMUSG00000078137.2	protein_coding	KI.vs.WT	yes
Tceal9	-0.5234218544737989	0.014575190781494234	699000000000	4.58661e+16	chrX	135145828	135147888	2061	+	ENSMUSG00000042712.11	protein_coding	KI.vs.WT	yes
Gm37818	1.9692e+16	0.01460210400822863	701000000000	-0.2375547576446753	chr11	18834623	18837791	3169	-	ENSMUSG00000104184.2	TEC	KI.vs.WT	yes
Get4	0.4949622265662031	0.01462375513837596	703000000000	3.66204e+16	chr5	139238079	139255806	17728	+	ENSMUSG00000025858.13	protein_coding	KI.vs.WT	no
1700123O21Rik	2.4403e+16	0.014834270143913588	714000000000	0.2527484776289104	chr16	5793449	5816360	22912	+	ENSMUSG00000101481.2	lncRNA	KI.vs.WT	yes
Gm37748	-2386452838532250	0.01488782689276042	718000000000	0.023050405389951085	chr1	170002749	170003888	1140	+	ENSMUSG00000104266.2	lncRNA	KI.vs.WT	yes
Rab11fip4os1	-1.83736e+16	0.01489408637167306	719000000000	0.4888422171793081	chr11	79497905	79513989	16085	-	ENSMUSG00000087434.2	lncRNA	KI.vs.WT	yes
Kcnf1	1.10675e+16	0.01489408637167306	720000000000	4468808769666390	chr12	17222101	17226889	4789	-	ENSMUSG00000051726.7	protein_coding	KI.vs.WT	yes
Gm44090	2.65373e+16	0.015014817500329744	726000000000	1.01007e+16	chr6	86016916	86018749	1834	+	ENSMUSG00000107927.2	TEC	KI.vs.WT	yes
Rasgef1a	1.2833e+16	0.015048171265654815	731000000000	3.67588e+16	chr6	117988399	118068507	80109	+	ENSMUSG00000030134.12	protein_coding	KI.vs.WT	yes
Gm44686	-1658361202981700	0.015048171265654815	731000000000	1.50386e+16	chr7	73187761	73204549	16789	+	ENSMUSG00000108563.2	lncRNA	KI.vs.WT	yes
ENSMUSG00000120697	-2.54041e+16	0.015048171265654815	731000000000	0.4011827530254468	chr12	25237501	25239096	1596	-	ENSMUSG00000120697.1	lncRNA	KI.vs.WT	yes
Gm1587	-2875888163958600	0.015048171265654815	731000000000	-0.5142278444191735	chr14	78031385	78036408	5024	-	ENSMUSG00000075512.6	lncRNA	KI.vs.WT	yes
Fam81a	0.8632442153759419	0.015050707954059333	732000000000	4317487487259350	chr9	69995793	70049842	54050	-	ENSMUSG00000032224.16	protein_coding	KI.vs.WT	yes
Kcnb2	1.20069e+16	0.015097571987886497	736000000000	4.75424e+16	chr1	15357478	15793974	436497	+	ENSMUSG00000092083.5	protein_coding	KI.vs.WT	yes
Gm47088	2.12368e+16	0.015097571987886497	736000000000	0.035825206827358215	chr13	93453935	93455573	1639	+	ENSMUSG00000113076.2	TEC	KI.vs.WT	yes
Neurl3	-0.7037533874802981	0.015199956130317266	743000000000	6422135470495230	chr1	36303678	36313760	10083	-	ENSMUSG00000047180.9	protein_coding	KI.vs.WT	yes
Eif1a	-0.8611566006023088	0.015199956130317266	743000000000	4993581109327640	chr18	46730768	46749523	18756	+	ENSMUSG00000057561.12	protein_coding	KI.vs.WT	yes
0610009L18Rik	-1.45079e+16	0.015276576312109318	74800000000	2.91382e+16	chr11	120239504	120242036	2533	+	ENSMUSG00000043644.6	lncRNA	KI.vs.WT	yes
Cep152	-0.5726026338211169	0.015288958125060112	749000000000	5108054687974560	chr2	125405008	125467033	62026	-	ENSMUSG00000068394.5	protein_coding	KI.vs.WT	yes
Gm30541	-1.69111e+16	0.015288958125060112	750000000000	1.24923e+16	chr19	53309029	53314174	5146	-	ENSMUSG00000118369.2	lncRNA	KI.vs.WT	yes
Hycc1	0.39543553270706583	0.01531777017897673	75200000000	5542457614210060	chr5	24120274	24235688	115415	-	ENSMUSG00000028995.15	protein_coding	KI.vs.WT	no
Gm38085	2287716502522360	0.015433270147511264	759000000000	1.19682e+16	chr2	4108688	4111749	3062	+	ENSMUSG00000102517.2	lncRNA	KI.vs.WT	yes
Map2	0.752138115068622	0.015439126345986388	761000000000	758848972800178	chr1	66214432	66481742	267311	+	ENSMUSG00000015222.19	protein_coding	KI.vs.WT	yes
Gpr26	1.7546e+16	0.015439126345986388	761000000000	2.95928e+16	chr7	131568189	131596134	27946	+	ENSMUSG00000040125.5	protein_coding	KI.vs.WT	yes
Retnla	1.60775e+16	0.015646837021639128	772000000000	1.35395e+16	chr16	48662914	48664824	1911	+	ENSMUSG00000061100.6	protein_coding	KI.vs.WT	yes
Tmem168	-0.2912310294765882	0.015690535397737054	775000000000	5951748564927600	chr6	13580686	13608099	27414	-	ENSMUSG00000029569.10	protein_coding	KI.vs.WT	no
Meis1	1120597639556180	0.015765435809608905	779000000000	3.88361e+16	chr11	18829817	18968985	139169	-	ENSMUSG00000020160.19	protein_coding	KI.vs.WT	yes
Cacng5	1.13834e+16	0.01582743434481698	784000000000	3.47709e+16	chr11	107765431	107805881	40451	-	ENSMUSG00000040373.13	protein_coding	KI.vs.WT	yes
Lgi1	1.71806e+16	0.01582743434481698	785000000000	1.98948e+16	chr19	38252984	38300662	47679	+	ENSMUSG00000067242.12	protein_coding	KI.vs.WT	yes
Gm36315	-2.7079e+16	0.01582743434481698	785000000000	0.30120346081409705	chr18	36021822	36023390	1569	-	ENSMUSG00000118358.2	lncRNA	KI.vs.WT	yes
Npas4	2134435067526350	0.015869467494663603	788000000000	3329679227272080	chr19	5034383	5040344	5962	-	ENSMUSG00000045903.10	protein_coding	KI.vs.WT	yes
Spata7	124936662774948	0.015893519946902926	790000000000	2381884797009490	chr12	98594416	98636074	41659	+	ENSMUSG00000021007.15	protein_coding	KI.vs.WT	yes
Nfya	-0.33328219192007663	0.01593032704066743	794000000000	6976786371208750	chr17	48693913	48716934	23022	-	ENSMUSG00000023994.14	protein_coding	KI.vs.WT	no
Sgip1	1.14143e+16	0.01593032704066743	795000000000	4826891670467410	chr4	102598494	102830825	232332	+	ENSMUSG00000028524.22	protein_coding	KI.vs.WT	yes
Gabra4	1.33295e+16	0.01593032704066743	795000000000	1.84391e+16	chr5	71727092	71815651	88560	-	ENSMUSG00000029211.12	protein_coding	KI.vs.WT	yes
Gm48259	2.45964e+16	0.016002914088120847	800000000000	2011900306866090	chr13	8328640	8329325	686	+	ENSMUSG00000113810.2	TEC	KI.vs.WT	yes
Cxcl16	-0.9075276715114429	0.016002914088120847	800000000000	6290679838103640	chr11	70344809	70350810	6002	-	ENSMUSG00000018920.12	protein_coding	KI.vs.WT	yes
Slc35f4	1.89489e+16	0.016021393646004387	802000000000	1.83421e+16	chr14	49535976	49763503	227528	-	ENSMUSG00000021852.15	protein_coding	KI.vs.WT	yes
Arhgap30	-0.2971874616782239	0.01613909388533818	809000000000	7967114208063740	chr1	171216522	171237866	21345	+	ENSMUSG00000048865.17	protein_coding	KI.vs.WT	no
Ehd1	-1220092514607040	0.016144436382138836	810000000000	5096528486768020	chr19	6326755	6350126	23372	+	ENSMUSG00000024772.10	protein_coding	KI.vs.WT	yes
3830403N18Rik	2243451670352180	0.016245230645835475	817000000000	2058279395627940	chrX	55181932	55198858	16927	+	ENSMUSG00000031125.3	protein_coding	KI.vs.WT	yes
Prelid2	-0.9494540802379905	0.016245230645835475	817000000000	1.31377e+16	chr18	42008665	42084307	75643	-	ENSMUSG00000056671.8	protein_coding	KI.vs.WT	yes
U2af2	-0.3021337144356761	0.016261047903217758	819000000000	6911713904629360	chr7	5065142	5082937	17796	+	ENSMUSG00000030435.17	protein_coding	KI.vs.WT	no
ENSMUSG00000120921	-2.35498e+16	0.016317184332012805	822000000000	1.05609e+16	chr1	88997228	88997725	498	-	ENSMUSG00000120921.1	lncRNA	KI.vs.WT	yes
C130071C03Rik	1631170134002120	0.016353556135860356	825000000000	3.98055e+16	chr13	83863381	84100589	237209	+	ENSMUSG00000050334.14	lncRNA	KI.vs.WT	yes
Nfkbia	-1.41525e+16	0.016353556135860356	826000000000	9074276044172800	chr12	55536195	55539432	3238	-	ENSMUSG00000021025.9	protein_coding	KI.vs.WT	yes
2510017J16Rik	2152584339842810	0.016361390427435132	828000000000	-0.09656882418598944	chr5	3635112	3636374	1263	+	ENSMUSG00000104891.2	lncRNA	KI.vs.WT	yes
Scrt1	0.782267961558424	0.016361390427435132	828000000000	3.58825e+16	chr15	76400403	76406699	6297	-	ENSMUSG00000048385.10	protein_coding	KI.vs.WT	yes
Gm37861	2199006646312230	0.016430552558706246	833000000000	0.005622818802682257	chr1	158203506	158206374	2869	+	ENSMUSG00000103762.2	TEC	KI.vs.WT	yes
Gm45804	2142105462051280	0.0164651348242595	835000000000	0.6812667582705692	chr8	95000054	95003488	3435	+	ENSMUSG00000110442.2	TEC	KI.vs.WT	yes
Aff2	1.95732e+16	0.016502690139606015	838000000000	1.18409e+16	chrX	68403900	68911643	507744	+	ENSMUSG00000031189.13	protein_coding	KI.vs.WT	yes
Ankfn1	1.62698e+16	0.016680974008334452	848000000000	1.70213e+16	chr11	89281049	89732092	451044	-	ENSMUSG00000047773.16	protein_coding	KI.vs.WT	yes
Gm12148	-1.83444e+16	0.016680974008334452	849000000000	2.53907e+16	chr11	43276309	43278010	1702	+	ENSMUSG00000084889.2	lncRNA	KI.vs.WT	yes
Slc25a2	-1.75164e+16	0.016785099325593134	855000000000	0.8716986602720602	chr18	37770431	37771776	1346	-	ENSMUSG00000050304.5	protein_coding	KI.vs.WT	yes
Gm17229	1.593e+16	0.016824090209859133	85800000000	0.6035823085166582	chr10	20391073	20395514	4442	-	ENSMUSG00000092051.3	transcribed_processed_pseudogene	KI.vs.WT	yes
Zfp866	0.6769689570751294	0.016824090209859133	859000000000	4226941203746560	chr8	70213976	70243828	29853	-	ENSMUSG00000043090.19	protein_coding	KI.vs.WT	yes
Apc	0.3609456973260219	0.016839249973884363	862000000000	8806019310676340	chr18	34353977	34455605	101629	+	ENSMUSG00000005871.16	protein_coding	KI.vs.WT	no
Pigh	0.6523684340544806	0.016839249973884363	862000000000	3.31307e+16	chr12	79127438	79136425	8988	-	ENSMUSG00000021120.12	protein_coding	KI.vs.WT	yes
Socs2	1.31672e+16	0.016839249973884363	863000000000	1.97588e+16	chr10	95221224	95253042	31819	-	ENSMUSG00000020027.19	protein_coding	KI.vs.WT	yes
6330562C20Rik	-2.14808e+16	0.016839249973884363	864000000000	-0.6336109370640469	chr3	95214387	95222446	8060	-	ENSMUSG00000093424.5	lncRNA	KI.vs.WT	yes
Rab10os	-0.7847502892987019	0.016938176231241175	870000000000	4465461818569920	chr12	3285442	3300383	14942	+	ENSMUSG00000079179.11	lncRNA	KI.vs.WT	yes
B230206I08Rik	2.80677e+16	0.017042080147945716	876000000000	0.9872114050299281	chr7	92057392	92060582	3191	+	ENSMUSG00000109574.2	TEC	KI.vs.WT	yes
Rpf1	-0.4940436360741813	0.017092623948833516	880000000000	4.66183e+16	chr3	146211711	146227184	15474	-	ENSMUSG00000028187.11	protein_coding	KI.vs.WT	no
Gm42608	227121847786833	0.01711050801220902	881000000000	0.9369895407415032	chr3	55424990	55427007	2018	+	ENSMUSG00000106651.2	TEC	KI.vs.WT	yes
Hsph1	1.5912e+16	0.017121002950911693	883000000000	7472479835867960	chr5	149537752	149559841	22090	-	ENSMUSG00000029657.16	protein_coding	KI.vs.WT	yes
ENSMUSG00000121211	-1582530927949330	0.017121601597527153	884000000000	2.29276e+16	chr2	34660850	34661806	957	-	ENSMUSG00000121211.1	lncRNA	KI.vs.WT	yes
Gm20443	-2.70135e+16	0.017465708750753855	903000000000	-0.10093199927115351	chr17	36048626	36050698	2073	-	ENSMUSG00000092219.2	lncRNA	KI.vs.WT	yes
4833412C15Rik	2.01854e+16	0.017465708750753855	90400000000	1.23197e+16	chr15	76997932	77000002	2071	-	ENSMUSG00000116298.2	TEC	KI.vs.WT	yes
ENSMUSG00000120176	-1.91041e+16	0.01749513023696944	906000000000	0.4674640780747098	chr17	15924696	15925119	424	-	ENSMUSG00000120176.1	lncRNA	KI.vs.WT	yes
Gm50399	-2.15837e+16	0.017502569120093063	908000000000	-0.09497427003469627	chr18	35995304	36010364	15061	+	ENSMUSG00000117840.2	lncRNA	KI.vs.WT	yes
Dzip3	0.47878982369610806	0.017527510723240245	910000000000	5320614570862410	chr16	48744595	48814528	69934	-	ENSMUSG00000064061.14	protein_coding	KI.vs.WT	no
Egr4	2.12442e+16	0.017597147918418758	915000000000	0.9737803445817308	chr6	85488103	85490571	2469	-	ENSMUSG00000071341.5	protein_coding	KI.vs.WT	yes
ENSMUSG00000120002	-1.04636e+16	0.017597147918418758	916000000000	1.57283e+16	chr1	181039576	181062292	22717	+	ENSMUSG00000120002.1	lncRNA	KI.vs.WT	yes
Prkcd	-0.39491080685540503	0.017597147918418758	91600000000	7934675102781040	chr14	30317311	30348167	30857	-	ENSMUSG00000021948.18	protein_coding	KI.vs.WT	no
Syt10	1.26272e+16	0.017612704190337395	919000000000	3561492538985060	chr15	89666596	89726063	59468	-	ENSMUSG00000063260.3	protein_coding	KI.vs.WT	yes
Dhps	-0.6627456776482542	0.017612704190337395	920000000000	3349047809490210	chr8	85798386	85801791	3406	+	ENSMUSG00000060038.15	protein_coding	KI.vs.WT	yes
Gm7909	2.45782e+16	0.017612704190337395	920000000000	0.18559052755864622	chr10	31450396	31451009	614	-	ENSMUSG00000098068.2	processed_pseudogene	KI.vs.WT	yes
Meis2	1.27486e+16	0.017622532810730708	922000000000	6550012493912440	chr2	115693545	115896320	202776	-	ENSMUSG00000027210.21	protein_coding	KI.vs.WT	yes
Gm15723	2.17342e+16	0.017630156641907136	92300000000	-0.16237239132533807	chr10	114637631	114652736	15106	+	ENSMUSG00000084865.2	lncRNA	KI.vs.WT	yes
Septin8	0.31057650359393885	0.017649090598034774	925000000000	6288567151965660	chr11	53410084	53440392	30309	+	ENSMUSG00000018398.19	protein_coding	KI.vs.WT	no
Slamf6	-0.768291652428744	0.017775692283772838	933000000000	3548361207834710	chr1	171745082	171780737	35656	+	ENSMUSG00000015314.11	protein_coding	KI.vs.WT	yes
Ccn4	1.71215e+16	0.01796939548683124	944000000000	2065460215016740	chr15	66763169	66795050	31882	+	ENSMUSG00000005124.11	protein_coding	KI.vs.WT	yes
Tagln2	-0.58509464116214	0.018215840545902678	958000000000	4516825346190540	chr1	172327614	172334947	7334	+	ENSMUSG00000026547.16	protein_coding	KI.vs.WT	yes
Gm36527	-1157037011268780	0.018215840545902678	960000000000	3266424202431110	chr1	151372308	151375336	3029	-	ENSMUSG00000103238.2	TEC	KI.vs.WT	yes
Hcn1	1208176994112550	0.018215840545902678	960000000000	2.7135e+16	chr13	117738856	118123954	385099	+	ENSMUSG00000021730.9	protein_coding	KI.vs.WT	yes
Fbxo44	1.16108e+16	0.018222985028335435	961000000000	2.91541e+16	chr4	148237257	148244939	7683	-	ENSMUSG00000029001.16	protein_coding	KI.vs.WT	yes
ENSMUSG00000120006	-1.72986e+16	0.018278568739533037	965000000000	1.3196e+16	chr11	84761638	84762819	1182	+	ENSMUSG00000120006.1	lncRNA	KI.vs.WT	yes
5330434G04Rik	2.02161e+16	0.01839860912524238	973000000000	2.89731e+16	chrX	104385101	104435437	50337	-	ENSMUSG00000087620.9	lncRNA	KI.vs.WT	yes
Prkg1	1.14935e+16	0.018438479678322565	976000000000	4426744964980030	chr19	30541889	31742433	1200545	-	ENSMUSG00000052920.17	protein_coding	KI.vs.WT	yes
Ift81	0.5847144828617387	0.018438479678322565	977000000000	3930771506178220	chr5	122688267	122752581	64315	-	ENSMUSG00000029469.15	protein_coding	KI.vs.WT	yes
Timm9	0.7942942307897118	0.018558928533412424	985000000000	2.68603e+16	chr12	71169947	71183458	13512	-	ENSMUSG00000021079.17	protein_coding	KI.vs.WT	yes
Gm16740	-1.23475e+16	0.018558928533412424	985000000000	1.35762e+16	chr3	95124732	95133969	9238	+	ENSMUSG00000097167.3	lncRNA	KI.vs.WT	yes
A230103L15Rik	2540325146945570	0.018588499598008328	98800000000	1207671496935870	chr7	58977066	58980937	3872	-	ENSMUSG00000109122.2	TEC	KI.vs.WT	yes
Kcnk9	1.82548e+16	0.018625470477569878	991000000000	3.32021e+16	chr15	72372938	72418189	45252	-	ENSMUSG00000036760.8	protein_coding	KI.vs.WT	yes
Slitrk1	1400202683826050	0.018665438337663626	994000000000	3294539671792060	chr14	109146232	109151590	5359	-	ENSMUSG00000075478.4	protein_coding	KI.vs.WT	yes
Hspa1a	3.42634e+16	0.018665438337663626	995000000000	94768018721905	chr17	35188166	35191132	2967	-	ENSMUSG00000091971.4	protein_coding	KI.vs.WT	yes
Elavl3	0.9214849339496958	0.018810362402016733	0.0010037816707802651	4764230747881650	chr9	21926301	21963319	37019	-	ENSMUSG00000003410.9	protein_coding	KI.vs.WT	yes
Gm44168	1.74862e+16	0.018842158737967803	0.0010065346007445805	2.24259e+16	chr6	87963173	87966711	3539	+	ENSMUSG00000108049.2	TEC	KI.vs.WT	yes
Nlgn1	1.18609e+16	0.018897035303452284	0.0010115322644830122	3.36529e+16	chr3	25480379	26386609	906231	-	ENSMUSG00000063887.14	protein_coding	KI.vs.WT	yes
Gm11839	2.3138e+16	0.018897035303452284	0.0010124501634031656	-0.4445062859970851	chr4	12114284	12116236	1953	+	ENSMUSG00000083246.2	processed_pseudogene	KI.vs.WT	yes
Gm15828	1.978e+16	0.018897035303452284	0.0010126438200728915	1.27622e+16	chr16	67389593	67390114	522	-	ENSMUSG00000082823.4	processed_pseudogene	KI.vs.WT	yes
Thoc2l	0.7691300180234132	0.018920965576955752	0.0010149867745037364	4994152504912830	chr5	104656216	104702073	45858	+	ENSMUSG00000097392.5	protein_coding	KI.vs.WT	yes
ENSMUSG00000120172	-2.1457e+16	0.019008200474999914	0.00102073184165078	1.07604e+16	chr9	59394030	59395219	1190	+	ENSMUSG00000120172.1	lncRNA	KI.vs.WT	yes
Sema4f	1.49192e+16	0.019095113370408867	0.001026469379048324	1.61428e+16	chr6	82888866	82916750	27885	-	ENSMUSG00000000627.16	protein_coding	KI.vs.WT	yes
Ppp2r2c	0.7032945292128561	0.019176844502300165	0.0010319378207515784	4322463378535810	chr5	37025857	37112422	86566	+	ENSMUSG00000029120.11	protein_coding	KI.vs.WT	yes
ENSMUSG00000121120	-2251063794107570	0.01920080603245612	0.0010343035088111172	0.20082523824632123	chr5	38719203	38719483	281	+	ENSMUSG00000121120.1	lncRNA	KI.vs.WT	yes
Lfng	-0.5366614952844797	0.019215870860220512	0.0010361921394356577	5381316408959430	chr5	140593075	140601300	8226	+	ENSMUSG00000029570.6	protein_coding	KI.vs.WT	yes
Gmppb	-0.9255160602594736	0.019420468793064458	0.0010483134219574594	3.45491e+16	chr9	107926441	107930000	3560	+	ENSMUSG00000070284.11	protein_coding	KI.vs.WT	yes
Hmga2-ps1	0.46173671401655136	0.019463164564014663	0.0010522339447655738	4728145250856820	chr1	176662183	176663734	1552	-	ENSMUSG00000121135.1	lncRNA	KI.vs.WT	no
Gm26871	2.30006e+16	0.019463164564014663	0.0010532498077522729	1.06762e+16	chr3	118223973	118323671	99699	+	ENSMUSG00000097311.9	lncRNA	KI.vs.WT	yes
Jund	-1019977981789010	0.019463164564014663	0.0010538910856972064	8583694042281380	chr8	71151599	71153265	1667	+	ENSMUSG00000071076.9	protein_coding	KI.vs.WT	yes
Gm43885	3591234489858270	0.019479044858703113	0.001055842846320959	0.056982955040888204	chr6	45171810	45174351	2542	+	ENSMUSG00000107643.2	TEC	KI.vs.WT	yes
ENSMUSG00000119945	-1.11558e+16	0.01956315185113596	0.0010614983739854042	1.18317e+16	chr5	142803640	142804717	1078	+	ENSMUSG00000119945.1	lncRNA	KI.vs.WT	yes
Gm45182	2520696417811430	0.019609180615705865	0.0010657299048052677	2.11025e+16	chr7	90807808	90810211	2404	+	ENSMUSG00000109387.2	TEC	KI.vs.WT	yes
Cdk5r1	0.5067024228733931	0.019609180615705865	0.0010661942375131553	5559864156840300	chr11	80367849	80372010	4162	+	ENSMUSG00000048895.14	protein_coding	KI.vs.WT	yes
Casp4	-1010224351374610	0.019618307088722264	0.0010678492051110226	4750986889433720	chr9	5308828	5336783	27956	+	ENSMUSG00000033538.14	protein_coding	KI.vs.WT	yes
1700040L08Rik	-2.14033e+16	0.019618307088722264	0.001068889825685989	-0.7392481245582508	chr6	71520176	71521098	923	-	ENSMUSG00000107406.2	lncRNA	KI.vs.WT	yes
Gm55600	-2422379369400400	0.019690110721750226	0.001073905702481108	-0.5416488635970285	chr9	108445494	108445613	120	-	ENSMUSG00002076293.1	miRNA	KI.vs.WT	yes
Auts2	1.11814e+16	0.019792139043075824	0.0010805797885625479	7463003000320570	chr5	131466171	132572183	1106013	-	ENSMUSG00000029673.20	protein_coding	KI.vs.WT	yes
Ppp1r15a	-1.70249e+16	0.019868608526793743	0.001085868459283851	8108438326864390	chr7	45172340	45175692	3353	-	ENSMUSG00000040435.13	protein_coding	KI.vs.WT	yes
Trim8	-0.40987474816163355	0.01988581356425851	0.0010879234326634701	788809265440429	chr19	46490141	46505287	15147	+	ENSMUSG00000025034.10	protein_coding	KI.vs.WT	no
Prkca	0.37140153783087065	0.01994248411473126	0.0010921416468661683	6905530663872750	chr11	107824213	108234754	410542	-	ENSMUSG00000050965.15	protein_coding	KI.vs.WT	no
Bbof1	1.45456e+16	0.0200738734292873	0.0011004623438252792	2.35e+16	chr12	84455845	84489661	33817	+	ENSMUSG00000057265.14	protein_coding	KI.vs.WT	yes
ENSMUSG00000120105	-1.74068e+16	0.02032497122159906	0.0011153669745485133	2352498998380930	chr1	43971765	43973093	1329	-	ENSMUSG00000120105.1	lncRNA	KI.vs.WT	yes
Gm12367	-242255330763423	0.02033858124293248	0.001119457234223606	0.08961052721261195	chr4	35225897	35262222	36326	+	ENSMUSG00000084828.2	lncRNA	KI.vs.WT	yes
Zfp36l2	-0.49459623256515683	0.02033858124293248	0.001119464492119852	8273651018888960	chr17	84491359	84495375	4017	-	ENSMUSG00000045817.9	protein_coding	KI.vs.WT	no
Nr2f1	0.9176767959034081	0.02033858124293248	0.0011195340123632115	2.14603e+16	chr13	78337092	78347876	10785	-	ENSMUSG00000069171.15	protein_coding	KI.vs.WT	yes
Enkur	-2.65266e+16	0.02035147287802031	0.0011222094024827477	0.7136889647753196	chr2	21185542	21210176	24635	-	ENSMUSG00000026679.4	protein_coding	KI.vs.WT	yes
Hspa1l	1668850966940000	0.02035147287802031	0.001122609887047171	1.50984e+16	chr17	35191679	35198261	6583	+	ENSMUSG00000007033.5	protein_coding	KI.vs.WT	yes
Rasgrp1	0.7442345544043045	0.02035147287802031	0.0011236659632763457	4882700098622650	chr2	117110474	117173482	63009	-	ENSMUSG00000027347.19	protein_coding	KI.vs.WT	yes
Scrn1	0.6822512984231993	0.020459012894616033	0.0011307503763504153	4.13522e+16	chr6	54478158	54543474	65317	-	ENSMUSG00000019124.11	protein_coding	KI.vs.WT	yes
Runx1t1	1.17019e+16	0.020475118748490846	0.001132788240177156	3.52611e+16	chr4	13743436	13893649	150214	+	ENSMUSG00000006586.16	protein_coding	KI.vs.WT	yes
Gm43099	0.9265028048999105	0.020635969727563198	0.0011428440633874685	1977187228978300	chr3	108195197	108200437	5241	+	ENSMUSG00000105358.2	TEC	KI.vs.WT	yes
Gm48063	2675635044577110	0.020658727312215745	0.001145262405368911	0.788759661446096	chr12	98776942	98779458	2517	-	ENSMUSG00000113020.2	TEC	KI.vs.WT	yes
ENSMUSG00000120421	-2.38939e+16	0.02072855651956414	0.001150295457083436	0.35536739798810746	chr10	21545164	21545959	796	+	ENSMUSG00000120421.1	lncRNA	KI.vs.WT	yes
ENSMUSG00000120511	-1.91323e+16	0.020740056215350945	0.0011520961720522863	1.01849e+16	chr10	99296501	99297637	1137	-	ENSMUSG00000120511.1	lncRNA	KI.vs.WT	yes
Gm14537	1.64268e+16	0.020764686917863786	0.0011546283308587935	2.85254e+16	chrX	20257948	20258740	793	+	ENSMUSG00000082855.2	processed_pseudogene	KI.vs.WT	yes
Lgr5	1.45638e+16	0.020793528811196654	0.0011573976518788273	3.71483e+16	chr10	115286216	115423685	137470	-	ENSMUSG00000020140.16	protein_coding	KI.vs.WT	yes
Adra1a	1.57726e+16	0.02082843871574088	0.0011605083006416164	3.61082e+16	chr14	66872700	67008617	135918	+	ENSMUSG00000045875.14	protein_coding	KI.vs.WT	yes
Ccrl2	-1.84168e+16	0.020837675300563855	0.0011621909710796544	6917703616427660	chr9	110883554	110886587	3034	-	ENSMUSG00000043953.13	protein_coding	KI.vs.WT	yes
Tro	1.28511e+16	0.020846068686252845	0.001165712482874331	398559555267655	chrX	149428300	149440579	12280	-	ENSMUSG00000025272.17	protein_coding	KI.vs.WT	yes
Zfp263	-0.3731076756396504	0.020846068686252845	0.0011661253884714536	5257876085573690	chr16	3561957	3568654	6698	+	ENSMUSG00000022529.12	protein_coding	KI.vs.WT	no
Gm37090	1.88181e+16	0.020846068686252845	0.0011661646047578665	1.0346e+16	chr4	156103013	156107117	4105	-	ENSMUSG00000103183.2	TEC	KI.vs.WT	yes
Ube2i	-0.3857167045555481	0.020901260030479072	0.0011704236978951005	5790382066951520	chr17	25480890	25493596	12707	-	ENSMUSG00000015120.16	protein_coding	KI.vs.WT	no
Dlx1as	1531522125310180	0.020982713057750405	0.0011761610458380272	2823830208688800	chr2	71346798	71368252	21455	-	ENSMUSG00000084946.4	lncRNA	KI.vs.WT	yes
Gm37558	-1.15348e+16	0.02100776710151876	0.0011787429859092084	3359753725770350	chr3	69027075	69030057	2983	-	ENSMUSG00000103094.2	TEC	KI.vs.WT	yes
Myom1	-0.47295854207928667	0.02102954359601893	0.0011811436481620498	449698562639745	chr17	71309628	71433851	124224	+	ENSMUSG00000024049.16	protein_coding	KI.vs.WT	no
Tom1l1	-0.4764904092969903	0.021047656968744794	0.001183340803792098	4313714473988910	chr11	90534291	90579192	44902	-	ENSMUSG00000020541.13	protein_coding	KI.vs.WT	no
Gm17024	-1.9338e+16	0.021071969627391576	0.0011858888736491673	3.52754e+16	chr12	40259486	40261072	1587	-	ENSMUSG00000090582.2	lncRNA	KI.vs.WT	yes
Grin2b	1.3856e+16	0.02115988211150812	0.0011920225068422455	6784218677403680	chr6	135690231	136150509	460279	-	ENSMUSG00000030209.15	protein_coding	KI.vs.WT	yes
ENSMUSG00000120073	-2.15685e+16	0.021178615477494684	0.0011942649759170208	0.14575936570068532	chr12	85519138	85519530	393	+	ENSMUSG00000120073.1	lncRNA	KI.vs.WT	yes
Zfp593	-1.14907e+16	0.021257643440262645	0.0011999129453107895	2799024121538270	chr4	133970600	133972903	2304	-	ENSMUSG00000028840.11	protein_coding	KI.vs.WT	yes
4632427E13Rik	-0.4864119630942765	0.021262092163556595	0.0012013558800933323	4675320405506250	chr7	92383374	92390718	7345	-	ENSMUSG00000074024.7	lncRNA	KI.vs.WT	no
Pik3r5	-0.3914127416799582	0.021268031381883164	0.0012034498064323483	6756515715771400	chr11	68322947	68388675	65729	+	ENSMUSG00000020901.14	protein_coding	KI.vs.WT	no
Hivep2	0.6452073488866255	0.021268031381883164	0.0012040757676963002	7210758557419690	chr10	13841819	14027118	185300	+	ENSMUSG00000015501.11	protein_coding	KI.vs.WT	yes
Gm23143	-2.6044e+16	0.021284207464533727	0.0012061846270540134	-0.07102066807457177	chr4	117059725	117059840	116	+	ENSMUSG00000119142.1	snRNA	KI.vs.WT	yes
ENSMUSG00000120188	-1.52767e+16	0.021328588760603038	0.0012110714840378291	2.51409e+16	chr16	30329491	30330867	1377	+	ENSMUSG00000120188.1	lncRNA	KI.vs.WT	yes
Gm6410	-2.65701e+16	0.021328588760603038	0.0012112163562388578	-0.11474836823553493	chr8	4728431	4738497	10067	+	ENSMUSG00000097308.3	lncRNA	KI.vs.WT	yes
Atcay	0.8407923292067736	0.021328588760603038	0.0012125797135487545	4437360787644200	chr10	81040342	81066667	26326	-	ENSMUSG00000034958.12	protein_coding	KI.vs.WT	yes
Epha4	1.06862e+16	0.021328588760603038	0.0012134819278033677	3381872255331260	chr1	77343822	77491725	147904	-	ENSMUSG00000026235.15	protein_coding	KI.vs.WT	yes
Gm45201	2168134562977860	0.02135506161852391	0.0012182077739447085	0.3094143647808038	chr7	92080378	92083056	2679	+	ENSMUSG00000109031.2	TEC	KI.vs.WT	yes
Gpr45	2.16328e+16	0.02135506161852391	0.001220035960843521	-0.1695100443466223	chr1	42992032	43074616	82585	+	ENSMUSG00000041907.10	protein_coding	KI.vs.WT	yes
Xirp1	1.66986e+16	0.02135506161852391	0.0012201905374028294	1102552361580430	chr9	119842821	119852664	9844	-	ENSMUSG00000079243.6	protein_coding	KI.vs.WT	yes
Gm37902	1.50572e+16	0.02135506161852391	0.0012204131659503605	1.14425e+16	chr1	80252448	80254130	1683	-	ENSMUSG00000103076.2	TEC	KI.vs.WT	yes
Pcyt1b	0.8935727076580599	0.02135506161852391	0.0012218080789132577	2.54515e+16	chrX	92698469	92793557	95089	+	ENSMUSG00000035246.17	protein_coding	KI.vs.WT	yes
Gm5628	-1672368400620020	0.02135506161852391	0.0012234020701193727	0.41088656503513205	chr13	18124493	18125541	1049	+	ENSMUSG00000113750.2	processed_pseudogene	KI.vs.WT	yes
Gm14204	1.86821e+16	0.02135506161852391	0.001224259888813355	2.63735e+16	chr2	158437388	158452643	15256	-	ENSMUSG00000086496.3	lncRNA	KI.vs.WT	yes
Sema3b	2.3965e+16	0.02135506161852391	0.0012257221520836272	0.24530548442131736	chr9	107474873	107486428	11556	-	ENSMUSG00000057969.16	protein_coding	KI.vs.WT	yes
Gm43868	-2.18475e+16	0.02135506161852391	0.0012280094777703749	0.210848717855335	chr6	113020996	113023109	2114	-	ENSMUSG00000107455.2	TEC	KI.vs.WT	yes
Gm28424	-1.97523e+16	0.02135506161852391	0.0012281245337447436	2.75056e+16	chr9	95393330	95395525	2196	+	ENSMUSG00000101037.3	lncRNA	KI.vs.WT	yes
ENSMUSG00000119955	-1.22531e+16	0.02135506161852391	0.001228155449585512	1.97476e+16	chr3	95892803	95896187	3385	+	ENSMUSG00000119955.1	lncRNA	KI.vs.WT	yes
Etf1	-0.40198292034691413	0.021388457038647706	0.0012312749651732732	6646863647452120	chr18	35035838	35065060	29223	-	ENSMUSG00000024360.9	protein_coding	KI.vs.WT	no
Donson	-0.5543752430397828	0.021451171750569483	0.0012364027752043074	4181565181009430	chr16	91473696	91485658	11963	-	ENSMUSG00000022960.14	protein_coding	KI.vs.WT	yes
Syn1	0.4949980509304636	0.021451171750569483	0.0012373269004519521	4702804120267380	chrX	20726750	20787243	60494	-	ENSMUSG00000037217.16	protein_coding	KI.vs.WT	no
Frrs1l	0.6986016626701939	0.021451171750569483	0.001238492539410682	3618559540019790	chr4	56957173	56990391	33219	-	ENSMUSG00000045589.8	protein_coding	KI.vs.WT	yes
Cndp2	-0.3366655377635987	0.02149044273158365	0.0012426735876715346	7.22335e+16	chr18	84685590	84703827	18238	-	ENSMUSG00000024644.18	protein_coding	KI.vs.WT	no
Gm38021	1.86132e+16	0.02149044273158365	0.001243169108688023	-0.35328503736719835	chr1	86821295	86822854	1560	+	ENSMUSG00000102649.2	TEC	KI.vs.WT	yes
Zbtb7a	-0.2727741811271186	0.021560778821557266	0.001248446441853624	6931684086384860	chr10	80971054	80988829	17776	+	ENSMUSG00000035011.16	protein_coding	KI.vs.WT	no
Cpne4	0.9534978476780401	0.02158586778068065	0.001253305673179483	4.23963e+16	chr9	104424485	104911743	487259	+	ENSMUSG00000032564.17	protein_coding	KI.vs.WT	yes
Slc1a1	1.20941e+16	0.02158586778068065	0.0012538052749011997	3.54081e+16	chr19	28812449	28891360	78912	+	ENSMUSG00000024935.12	protein_coding	KI.vs.WT	yes
Map6d1	1.10146e+16	0.02158586778068065	0.0012544050285586694	1.40162e+16	chr16	20052053	20060108	8056	-	ENSMUSG00000041205.9	protein_coding	KI.vs.WT	yes
Gpr61	1.63729e+16	0.02158586778068065	0.0012547390632604166	1.1985e+16	chr3	108055637	108062198	6562	-	ENSMUSG00000046793.9	protein_coding	KI.vs.WT	yes
Asxl3	1.67884e+16	0.021661154720397365	0.0012603295179244656	2930771383574390	chr18	22477303	22663284	185982	+	ENSMUSG00000045215.18	protein_coding	KI.vs.WT	yes
Tmem240	1473589752280790	0.021696563358404412	0.0012636059041133511	2.3664e+16	chr4	155819257	155825021	5765	+	ENSMUSG00000084845.10	protein_coding	KI.vs.WT	yes
Gm45130	2.8299e+16	0.021769572336988487	0.0012691216608032218	0.4207038504734946	chr7	91465375	91468762	3388	+	ENSMUSG00000109481.2	TEC	KI.vs.WT	yes
Sprn	1.40285e+16	0.021769572336988487	0.0012702984754935547	1.57407e+16	chr7	139730541	139734790	4250	-	ENSMUSG00000045733.8	protein_coding	KI.vs.WT	yes
Ehbp1l1	-0.32218882912824925	0.021896701046021927	0.001279491201803426	6494729823484820	chr19	5757404	5776345	18942	-	ENSMUSG00000024937.16	protein_coding	KI.vs.WT	no
Gm37628	2496671513283970	0.021896701046021927	0.0012801714793161923	1.0509e+16	chr1	25725143	25730582	5440	-	ENSMUSG00000102317.2	TEC	KI.vs.WT	yes
Ncf1	-0.40889529786437984	0.0219382672667191	0.0012856795770198233	8606384620117400	chr5	134248907	134258479	9573	-	ENSMUSG00000015950.14	protein_coding	KI.vs.WT	no
Rgs3	-0.803789993791203	0.0219382672667191	0.0012863414604214881	4677983232343360	chr4	62478084	62622238	144155	+	ENSMUSG00000059810.19	protein_coding	KI.vs.WT	yes
C78859	204017309966591	0.0219382672667191	0.0012874700251026261	3262667169399610	chr8	95048786	95054728	5943	+	ENSMUSG00000110710.2	lncRNA	KI.vs.WT	yes
Cbx6	0.6447700346999883	0.0219382672667191	0.0012875205060680996	5285691706388260	chr15	79708097	79718889	10793	-	ENSMUSG00000089715.13	protein_coding	KI.vs.WT	yes
Gm42617	2.54877e+16	0.02197181428008262	0.0012907209285609074	2.40924e+16	chr5	52049328	52050556	1229	-	ENSMUSG00000104919.2	TEC	KI.vs.WT	yes
Tfe3	-0.3406686267795113	0.02197692146548798	0.0012922528372924268	6849962683748510	chrX	7628799	7641441	12643	+	ENSMUSG00000000134.18	protein_coding	KI.vs.WT	no
Casp8	-0.3654072730763141	0.02201965610442855	0.0012959999388817253	6873649931428440	chr1	58834533	58886662	52130	+	ENSMUSG00000026029.15	protein_coding	KI.vs.WT	no
H2-K2	-1884531314494110	0.02205536451544745	0.0012993378983035466	1.78563e+16	chr17	34193608	34197811	4204	-	ENSMUSG00000121503.1	lncRNA	KI.vs.WT	yes
Tmem88	-2148286483270120	0.02212094939720768	0.0013046111738914566	0.6120970341264717	chr11	69287345	69289060	1716	-	ENSMUSG00000045377.6	protein_coding	KI.vs.WT	yes
Zbtb11	-0.41599761893954135	0.02212094939720768	0.001305681598388996	5293721862471160	chr16	55794246	55829276	35031	+	ENSMUSG00000022601.12	protein_coding	KI.vs.WT	no
Dusp11	-0.26630108253668056	0.02216714810195875	0.0013096510145439756	6060868548219100	chr6	85919250	85938649	19400	-	ENSMUSG00000030002.16	protein_coding	KI.vs.WT	no
ENSMUSG00000121207	-1.57957e+16	0.022283056516686005	0.0013177480171022275	3.05804e+16	chr7	66681700	66694074	12375	-	ENSMUSG00000121207.1	lncRNA	KI.vs.WT	yes
Uxs1	0.37538968506872983	0.022364143760067037	0.001325542093783912	4583359902092110	chr1	43786126	43866960	80835	-	ENSMUSG00000057363.13	protein_coding	KI.vs.WT	no
Gm44708	2.71212e+16	0.022364143760067037	0.0013258786502929273	-0.9141582913260317	chr7	57425177	57427413	2237	+	ENSMUSG00000108597.2	TEC	KI.vs.WT	yes
6430590A07Rik	1.52742e+16	0.022364143760067037	0.001326304041376173	1.58289e+16	chr3	40840332	40848628	8297	-	ENSMUSG00000097583.3	lncRNA	KI.vs.WT	yes
Kcnq3	1.37184e+16	0.02248157000056343	0.0013345281743608	251964426359379	chr15	65858236	66158491	300256	-	ENSMUSG00000056258.10	protein_coding	KI.vs.WT	yes
Gtf2b	-0.5715711722808793	0.022498039100591373	0.0013373495412673353	4727932559929050	chr3	142470806	142489367	18562	+	ENSMUSG00000028271.10	protein_coding	KI.vs.WT	yes
Ptp4a1	-1.15382e+16	0.022498039100591373	0.0013394331736852254	3.02505e+16	chr1	30979383	30988390	9008	-	ENSMUSG00000026064.17	protein_coding	KI.vs.WT	yes
Mog	1.60947e+16	0.022498039100591373	0.0013394604005253382	1.00305e+16	chr17	37321635	37334290	12656	-	ENSMUSG00000076439.13	protein_coding	KI.vs.WT	yes
Dnajc21	-0.37448304321750575	0.022498039100591373	0.001342264892236331	4802598025188960	chr15	10446842	10470602	23761	-	ENSMUSG00000044224.17	protein_coding	KI.vs.WT	no
Gm4152	-1.65456e+16	0.022498039100591373	0.0013435067104419786	0.9384655151597406	chr17	34199457	34199732	276	-	ENSMUSG00000092512.3	processed_pseudogene	KI.vs.WT	yes
Gm49599	-1.0564e+16	0.022498039100591373	0.0013442040247991884	2563082130379730	chr16	36695502	36700596	5095	+	ENSMUSG00000116908.2	TEC	KI.vs.WT	yes
Ermap	-0.6988017350162421	0.022498039100591373	0.0013451351272530448	3954558410091170	chr4	119032654	119047208	14555	-	ENSMUSG00000028644.18	protein_coding	KI.vs.WT	yes
Gm44064	-2155697635082850	0.022498039100591373	0.001345594603157567	-0.5756645788828555	chr6	87828180	87829277	1098	+	ENSMUSG00000107798.3	TEC	KI.vs.WT	yes
Vgll4	-0.32407706330116254	0.02251255176691988	0.001347724511607087	5428971763362700	chr6	114837589	114946955	109367	-	ENSMUSG00000030315.16	protein_coding	KI.vs.WT	no
Gm12098	2139300892692150	0.022553788084851256	0.001351457368985762	-0.09840132041361532	chr11	30518182	30518898	717	-	ENSMUSG00000082078.2	processed_pseudogene	KI.vs.WT	yes
ENSMUSG00000120709	-2162810003495290	0.022596891121202375	0.001355306810520546	1.51785e+16	chr12	75716579	75718349	1771	+	ENSMUSG00000120709.1	lncRNA	KI.vs.WT	yes
Cyfip2	0.6764170685019065	0.02262754573431273	0.001359446260857148	5222247531371140	chr11	46084677	46203686	119010	-	ENSMUSG00000020340.17	protein_coding	KI.vs.WT	yes
Oprd1	1.51064e+16	0.02262754573431273	0.0013596821203578054	2.69649e+16	chr4	131838037	131871797	33761	-	ENSMUSG00000050511.2	protein_coding	KI.vs.WT	yes
Smad7	-0.7204756088044002	0.02265640584036209	0.001362686292976935	7322846790801480	chr18	75500600	75529006	28407	+	ENSMUSG00000025880.12	protein_coding	KI.vs.WT	yes
Rmi1	-0.5257582940674038	0.022669323100557096	0.0013647339131164977	3.82672e+16	chr13	58550062	58558962	8901	+	ENSMUSG00000035367.10	protein_coding	KI.vs.WT	yes
Gm38198	2.34642e+16	0.022698689379751558	0.0013685271565823563	1109163915061180	chr1	25774470	25778050	3581	-	ENSMUSG00000102465.2	TEC	KI.vs.WT	yes
Zmynd15	-1.40552e+16	0.022698689379751558	0.001369046511917751	2.43612e+16	chr11	70350259	70357028	6770	+	ENSMUSG00000040829.15	protein_coding	KI.vs.WT	yes
Kcnj3	111463254045136	0.022837616821841517	0.0013787059034261948	4178353242350450	chr2	55325982	55488157	162176	+	ENSMUSG00000026824.12	protein_coding	KI.vs.WT	yes
Tubb4a	0.6852679760834325	0.022985744957300068	0.001388936830939993	4154234866307160	chr17	57387066	57394782	7717	-	ENSMUSG00000062591.6	protein_coding	KI.vs.WT	yes
Zfp300	2.02239e+16	0.023009573741842915	0.0013916664836013737	-0.3330434155227793	chrX	20945413	20955766	10354	-	ENSMUSG00000031079.13	protein_coding	KI.vs.WT	yes
C1qtnf4	0.9506177324045615	0.023096387130728986	0.0014006900739396075	2.86574e+16	chr2	90716204	90720869	4666	+	ENSMUSG00000040794.6	protein_coding	KI.vs.WT	yes
Ociad2	1.03136e+16	0.023096387130728986	0.0014009521098529605	2.63721e+16	chr5	73479542	73498371	18830	-	ENSMUSG00000029153.12	protein_coding	KI.vs.WT	yes
C730034F03Rik	-1.4498e+16	0.023096387130728986	0.001401727519137255	1.75278e+16	chr15	89313792	89315071	1280	+	ENSMUSG00000079242.3	lncRNA	KI.vs.WT	yes
ENSMUSG00000121108	-2155208131746600	0.023096387130728986	0.0014036760199564256	1.1923e+16	chr9	123741765	123742183	419	-	ENSMUSG00000121108.1	lncRNA	KI.vs.WT	yes
ENSMUSG00000120648	-0.9693979231478821	0.023096387130728986	0.001403886505547724	3372443431006580	chr6	31076849	31103456	26608	-	ENSMUSG00000120648.1	lncRNA	KI.vs.WT	yes
Hypk	-1153388293709720	0.023096387130728986	0.001404879392913126	2053348082535780	chr2	121283771	121289153	5383	+	ENSMUSG00000027245.12	protein_coding	KI.vs.WT	yes
Fbxl2	1.70099e+16	0.023096387130728986	0.0014059796201777847	1.61888e+16	chr9	113792705	113875259	82555	-	ENSMUSG00000032507.16	protein_coding	KI.vs.WT	yes
Il27	-1.61185e+16	0.023145703457126098	0.0014103726252405763	0.5958335434364685	chr7	126188182	126194113	5932	-	ENSMUSG00000044701.6	protein_coding	KI.vs.WT	yes
Snhg11	155782925829774	0.023145703457126098	0.0014115765337081386	7.12826e+16	chr2	158217558	158228071	10514	+	ENSMUSG00000044349.17	protein_coding	KI.vs.WT	yes
Pbx3	0.7511893635920744	0.023178299369786513	0.0014151674695501231	5414185359724820	chr2	34061469	34263154	201686	-	ENSMUSG00000038718.16	protein_coding	KI.vs.WT	yes
ENSMUSG00000120816	-2737630894717750	0.023178299369786513	0.0014170771315967037	0.14754731755904987	chr19	5896372	5896647	276	-	ENSMUSG00000120816.1	lncRNA	KI.vs.WT	yes
Ndst3	1.7715e+16	0.023178299369786513	0.0014174621419527514	0.7278701847975857	chr3	123319815	123484502	164688	-	ENSMUSG00000027977.16	protein_coding	KI.vs.WT	yes
Gm1976	1292877757796410	0.023235248861253017	0.001422247295767281	1.91717e+16	chr17	95067366	95142249	74884	-	ENSMUSG00000066057.9	lncRNA	KI.vs.WT	yes
Gm10855	2.21815e+16	0.023282516577448134	0.0014264456625084534	1.97486e+16	chr2	6937352	6939892	2541	-	ENSMUSG00000075538.3	lncRNA	KI.vs.WT	yes
Ccdc39	1518832191587410	0.023315006925317818	0.0014339179862890112	2.32475e+16	chr3	33866511	33898459	31949	-	ENSMUSG00000027676.12	protein_coding	KI.vs.WT	yes
G630016G05Rik	1.41159e+16	0.023315006925317818	0.0014345661785971722	3385274793463470	chr2	115897696	115916393	18698	+	ENSMUSG00000086308.3	lncRNA	KI.vs.WT	yes
8430429K09Rik	1.1927e+16	0.023315006925317818	0.0014358769398476485	1465846402470520	chr11	3402365	3429831	27467	+	ENSMUSG00000034587.10	lncRNA	KI.vs.WT	yes
Gm16759	2.05706e+16	0.023315006925317818	0.0014361627025999471	-0.15094493413248453	chr9	63305883	63475973	170091	+	ENSMUSG00000086539.9	lncRNA	KI.vs.WT	yes
Kcnb1	0.9198304712711229	0.023315006925317818	0.0014371012673068907	5842237897483760	chr2	166937889	167032075	94187	-	ENSMUSG00000050556.10	protein_coding	KI.vs.WT	yes
Gad1	0.9865803525279141	0.023315006925317818	0.0014373886615272244	6769420957516460	chr2	70383416	70432358	48943	+	ENSMUSG00000070880.11	protein_coding	KI.vs.WT	yes
Gm36638	-1515114937041390	0.023315006925317818	0.0014375845077269954	3.03874e+16	chr13	101886228	101888396	2169	-	ENSMUSG00000104214.2	TEC	KI.vs.WT	yes
5330437M03Rik	2989171204792080	0.023356567904609427	0.0014414563488214674	-0.1265832796550533	chr6	21681300	21685382	4083	+	ENSMUSG00000106855.2	TEC	KI.vs.WT	yes
1700016P03Rik	2126217836270820	0.023421501269917194	0.0014467765918973513	2.14499e+16	chr11	75063385	75068464	5080	+	ENSMUSG00000085609.3	lncRNA	KI.vs.WT	yes
Zfand5	-0.9911166987781767	0.02344509129361357	0.0014495479650703906	7900008619747150	chr19	21249642	21264204	14563	+	ENSMUSG00000024750.12	protein_coding	KI.vs.WT	yes
Jmjd1c	-0.40794623723196116	0.023462713299270892	0.00145195266156923	9184549053702980	chr10	66931904	67092105	160202	+	ENSMUSG00000037876.18	protein_coding	KI.vs.WT	no
C230071H17Rik	2.26528e+16	0.023465264530933214	0.0014544416334908907	2.89184e+16	chr5	131911805	131914777	2973	-	ENSMUSG00000106570.2	TEC	KI.vs.WT	yes
ENSMUSG00000120148	-2.18639e+16	0.023465264530933214	0.0014547411755163752	-0.03940285237997092	chr2	130115249	130116182	934	-	ENSMUSG00000120148.1	lncRNA	KI.vs.WT	yes
ENSMUSG00000120832	-1.98553e+16	0.023484600815176896	0.0014577871265295578	0.148277796470706	chr1	86452536	86453005	470	-	ENSMUSG00000120832.1	lncRNA	KI.vs.WT	yes
Rasl11b	0.8667332376352738	0.023484600815176896	0.0014598209556182212	2.77464e+16	chr5	74355947	74360142	4196	+	ENSMUSG00000049907.9	protein_coding	KI.vs.WT	yes
Cndp1	1.89445e+16	0.023484600815176896	0.0014598891426026446	-0.5353814802928055	chr18	84628634	84668220	39587	-	ENSMUSG00000056162.15	protein_coding	KI.vs.WT	yes
Gm14774	2580573962446230	0.0234881873149681	0.001461428695045661	0.20224653177792504	chrX	87079977	87080512	536	-	ENSMUSG00000081424.2	processed_pseudogene	KI.vs.WT	yes
Pim1	-1.61456e+16	0.02352572094713371	0.0014650827338713876	4675454925568950	chr17	29709727	29715086	5360	+	ENSMUSG00000024014.9	protein_coding	KI.vs.WT	yes
Dclk1	0.7883829454078927	0.023636860289475252	0.0014733289597475604	6208917706768830	chr3	55149785	55446489	296705	+	ENSMUSG00000027797.16	protein_coding	KI.vs.WT	yes
Apobec3	-0.4568102718229808	0.023742699116774894	0.0014812569572292857	5842602324342490	chr15	79775860	79800107	24248	+	ENSMUSG00000009585.19	protein_coding	KI.vs.WT	no
Gm11423	-1380699202077870	0.023857945355947232	0.0014897842559711443	1.7707e+16	chr11	82670423	82671925	1503	-	ENSMUSG00000085175.9	lncRNA	KI.vs.WT	yes
Gimap6	-0.7794064635819826	0.02394262807983892	0.0014986950992806776	5058245263777490	chr6	48678516	48685159	6644	-	ENSMUSG00000047867.12	protein_coding	KI.vs.WT	yes
4933432I03Rik	-2439702200088070	0.02394262807983892	0.0014993722619664881	-0.7635192269355209	chr14	103224848	103271239	46392	-	ENSMUSG00000114980.2	lncRNA	KI.vs.WT	yes
Tnf	-2331236620048270	0.02394262807983892	0.0014996434918479813	6615663309291560	chr17	35418357	35420983	2627	-	ENSMUSG00000024401.15	protein_coding	KI.vs.WT	yes
5031434O11Rik	-1.26651e+16	0.02394262807983892	0.0015004404816849727	2231350386941180	chr3	51467456	51474538	7083	+	ENSMUSG00000097885.8	lncRNA	KI.vs.WT	yes
Alkbh5	-0.31968529337960444	0.02410494930160796	0.0015119640285033245	6606445042290370	chr11	60427207	60449338	22132	+	ENSMUSG00000042650.4	protein_coding	KI.vs.WT	no
Dgkb	0.9851458293596503	0.02418308808313247	0.0015182207765195273	5.00964e+16	chr12	37867725	38684238	816514	+	ENSMUSG00000036095.12	protein_coding	KI.vs.WT	yes
Gm43149	2531641604296870	0.024193154788817586	0.0015202088855529436	-0.609651417665429	chr3	103673011	103674432	1422	-	ENSMUSG00000105229.2	lncRNA	KI.vs.WT	yes
Gm37800	-2043755266888760	0.02420353638735423	0.0015222179275006416	1.13762e+16	chr1	184342477	184361670	19194	-	ENSMUSG00000103308.6	lncRNA	KI.vs.WT	yes
D730044K07Rik	-173639449787232	0.024205788481019258	0.0015261556697730467	1.15272e+16	chr15	34443126	34444958	1833	+	ENSMUSG00000115685.2	TEC	KI.vs.WT	yes
Gm46364	217675896009014	0.024205788481019258	0.001526755592062617	-0.7715102167795452	chr12	80660070	80660388	319	+	ENSMUSG00000112606.2	processed_pseudogene	KI.vs.WT	yes
Gm37859	3.14028e+16	0.024205788481019258	0.0015274415116950913	-0.5164423404535842	chr3	108439964	108442136	2173	-	ENSMUSG00000103761.2	TEC	KI.vs.WT	yes
Mir1938	-1.56538e+16	0.024205788481019258	0.001527786873858054	3.29392e+16	chr12	40272711	40272810	100	-	ENSMUSG00000089371.3	miRNA	KI.vs.WT	yes
Nrbp1	-0.36806813697442986	0.0242132403613057	0.001529614455560063	5912044390605580	chr5	31398208	31408910	10703	+	ENSMUSG00000029148.16	protein_coding	KI.vs.WT	no
ENSMUSG00000120237	124576596239501	0.0242668737149804	0.0015343628671803749	1.74284e+16	chr7	60662432	60705176	42745	-	ENSMUSG00000120237.1	lncRNA	KI.vs.WT	yes
Nopchap1	1.11536e+16	0.02430237420123234	0.001537969757465881	6027319752523060	chr10	83196085	83324369	128285	+	ENSMUSG00000020255.9	protein_coding	KI.vs.WT	yes
Lonrf2	0.6837914237165523	0.02437932045553106	0.001544205836028593	3.6536e+16	chr1	38832726	38875792	43067	-	ENSMUSG00000048814.12	protein_coding	KI.vs.WT	yes
Ubap1l	1829767856047790	0.024557609079710628	0.0015568753289883813	0.16562713266589094	chr9	65268323	65287659	19337	+	ENSMUSG00000086228.4	protein_coding	KI.vs.WT	yes
2900022M07Rik	2185924467551620	0.024653346669047005	0.0015645738062921972	0.7607006955781056	chr1	25848037	25849053	1017	-	ENSMUSG00000102386.2	TEC	KI.vs.WT	yes
Gm43597	1293219606625080	0.024653346669047005	0.0015670366232501491	2.16639e+16	chr5	150523397	150530468	7072	-	ENSMUSG00000107096.4	lncRNA	KI.vs.WT	yes
Cx3cl1	0.9032045512177103	0.024653346669047005	0.0015673124262274801	4659001980667430	chr8	95498637	95509055	10419	+	ENSMUSG00000031778.14	protein_coding	KI.vs.WT	yes
Gm47439	-1706084994463140	0.024653346669047005	0.0015684724478345488	0.36861594585907415	chr12	98225319	98226566	1248	+	ENSMUSG00000112860.2	lncRNA	KI.vs.WT	yes
ENSMUSG00000121075	-1.26615e+16	0.024687143303501254	0.0015720064345727256	1.38302e+16	chr15	79241081	79241969	889	-	ENSMUSG00000121075.1	lncRNA	KI.vs.WT	yes
Chrm2	1.06032e+16	0.02486212467582474	0.0015852962104017086	3.40182e+16	chr6	36365019	36505349	140331	+	ENSMUSG00000045613.10	protein_coding	KI.vs.WT	yes
Brinp2	1.35991e+16	0.02486212467582474	0.001587146614794845	4317873488326280	chr1	158072839	158183896	111058	-	ENSMUSG00000004031.14	protein_coding	KI.vs.WT	yes
Sox12	0.9501293218094647	0.02486212467582474	0.0015873295967356715	3.14478e+16	chr2	152235531	152239983	4453	-	ENSMUSG00000051817.9	protein_coding	KI.vs.WT	yes
Dazap2	-0.3030845949744231	0.02486220106897479	0.0015887280952147568	7005996116633770	chr15	100513230	100518642	5413	+	ENSMUSG00000000346.10	protein_coding	KI.vs.WT	no
Gm34589	-0.9441548251581173	0.02495901237894249	0.0015977065940269279	3613654574727840	chr14	103055600	103072194	16595	-	ENSMUSG00000115816.2	lncRNA	KI.vs.WT	yes
ENSMUSG00000120256	-2.11474e+16	0.02495901237894249	0.0015977125637193007	2.19194e+16	chr4	128915012	128926512	11501	-	ENSMUSG00000120256.1	lncRNA	KI.vs.WT	yes
Plpbp	-0.6237767335295968	0.024971776425741977	0.001599929397680666	5203647596981200	chr8	27532583	27546160	13578	+	ENSMUSG00000031485.16	protein_coding	KI.vs.WT	yes
Kcna4	1.50977e+16	0.024996007475013154	0.0016031225101179266	3.79152e+16	chr2	107120984	107128847	7864	+	ENSMUSG00000042604.6	protein_coding	KI.vs.WT	yes
Dpp10	1.21668e+16	0.024996007475013154	0.0016051494051522086	4285420936759230	chr1	123249200	124773776	1524577	-	ENSMUSG00000036815.18	protein_coding	KI.vs.WT	yes
Cacng3	1.42593e+16	0.024996007475013154	0.0016056852335406431	1.89777e+16	chr7	122269715	122368616	98902	+	ENSMUSG00000066189.10	protein_coding	KI.vs.WT	yes
4933407L21Rik	1.87314e+16	0.02503545484810141	0.0016105941880667964	0.4800164880983084	chr1	85856204	85868346	12143	+	ENSMUSG00000026224.12	protein_coding	KI.vs.WT	yes
8030456M14Rik	-1345411718583730	0.02503545484810141	0.0016110259061446425	2208739838165860	chr19	53379208	53380226	1019	+	ENSMUSG00000117768.3	lncRNA	KI.vs.WT	yes
Zfp759	0.8547452509696465	0.02503707085288414	0.0016125333189441636	2.74543e+16	chr13	67269724	67289851	20128	+	ENSMUSG00000057396.8	protein_coding	KI.vs.WT	yes
Dctn3	-0.6946909133188062	0.025063437267012777	0.0016156363709116982	3474108156201360	chr4	41714798	41723170	8373	-	ENSMUSG00000028447.12	protein_coding	KI.vs.WT	yes
Gm28892	1.85017e+16	0.025081377191253494	0.0016181987190096844	-0.24472318785342217	chr1	134761880	134774153	12274	+	ENSMUSG00000101168.2	lncRNA	KI.vs.WT	yes
Sfr1	-0.4505627786808585	0.025115693966991183	0.001621820596971628	6151763448964360	chr19	47720121	47724027	3907	+	ENSMUSG00000025066.11	protein_coding	KI.vs.WT	no
Rbfox1	0.7622367078367146	0.02514403208641744	0.0016250599212802304	4.46197e+16	chr16	5703219	7229390	1526172	+	ENSMUSG00000008658.17	protein_coding	KI.vs.WT	yes
Gm29340	-1655449564878020	0.025244260608622317	0.0016335091217863733	2459642641085310	chr2	116803056	116806909	3854	-	ENSMUSG00000099470.2	lncRNA	KI.vs.WT	yes
Gm38142	1581006277846500	0.025244260608622317	0.0016343677692241467	0.45352561514921674	chr1	86753823	86757377	3555	+	ENSMUSG00000102383.2	TEC	KI.vs.WT	yes
Map1b	0.6042465833251434	0.025318814957857965	0.0016406137943544737	7037608835036560	chr13	99557954	99653048	95095	-	ENSMUSG00000052727.7	protein_coding	KI.vs.WT	yes
Negr1	1.07944e+16	0.02532304218796529	0.0016423071643203947	4500434765729980	chr3	156267431	157022082	754652	+	ENSMUSG00000040037.14	protein_coding	KI.vs.WT	yes
Septin11	0.5484623215524479	0.025347110674230962	0.0016452889103564716	6309839203146850	chr5	93241296	93324306	83011	+	ENSMUSG00000058013.12	protein_coding	KI.vs.WT	yes
Dync1i1	1.14337e+16	0.02554048606201225	0.0016592726090735538	4960631546124960	chr6	5725639	6028039	302401	+	ENSMUSG00000029757.17	protein_coding	KI.vs.WT	yes
Sdc4	-0.9678674246758764	0.02554309718886978	0.0016608740324601428	5973286303809280	chr2	164266167	164285807	19641	-	ENSMUSG00000017009.4	protein_coding	KI.vs.WT	yes
Ano6	0.31377283698704633	0.025565507217789468	0.0016637642309334964	6626089883312570	chr15	95688724	95872632	183909	+	ENSMUSG00000064210.8	protein_coding	KI.vs.WT	no
Rab3c	0.6635715194403488	0.025570692961468727	0.0016659411556876908	377140581115158	chr13	110190721	110417530	226810	-	ENSMUSG00000021700.11	protein_coding	KI.vs.WT	yes
Gm3336	1.76374e+16	0.025570692961468727	0.0016669683808401418	-0.08676462835734518	chr8	71171192	71175283	4092	+	ENSMUSG00000095026.3	protein_coding	KI.vs.WT	yes
Tlcd3a	1.46864e+16	0.025616059781998542	0.0016713617481079765	1.97303e+16	chr11	76070497	76105653	35157	+	ENSMUSG00000069808.14	protein_coding	KI.vs.WT	yes
ENSMUSG00000120443	-1.69224e+16	0.02562790834133357	0.0016736000898767574	0.772490849685901	chr11	120464219	120464614	396	+	ENSMUSG00000120443.1	lncRNA	KI.vs.WT	yes
Ttll13	2.0278e+16	0.02562790834133357	0.0016750079106499407	-0.07265192201804334	chr7	79896124	79910569	14446	+	ENSMUSG00000045467.14	protein_coding	KI.vs.WT	yes
ENSMUSG00000120976	1.48318e+16	0.025653140703424938	0.0016780950224717995	0.8410191437494029	chr6	126613426	126615640	2215	-	ENSMUSG00000120976.1	lncRNA	KI.vs.WT	yes
Klf11	-1.00895e+16	0.025671464905586916	0.0016824910003356728	3.46017e+16	chr12	24701273	24712788	11516	+	ENSMUSG00000020653.13	protein_coding	KI.vs.WT	yes
Akap11	0.24516281325669853	0.025671464905586916	0.0016832514390744437	6761125102385910	chr14	78729686	78774248	44563	-	ENSMUSG00000022016.18	protein_coding	KI.vs.WT	no
Ppp4r4	1.3111e+16	0.025671464905586916	0.0016836106468350164	3.0624e+16	chr12	103498542	103580090	81549	+	ENSMUSG00000021209.13	protein_coding	KI.vs.WT	yes
Rhbdd3	-0.7880567276043782	0.02572372432181921	0.0016884798868189628	2.58282e+16	chr11	5048926	5056093	7168	+	ENSMUSG00000034175.14	protein_coding	KI.vs.WT	yes
Tnip2	-0.5974262083521326	0.02583244090485327	0.0016984512296862402	4768212528971250	chr5	34653431	34671335	17905	-	ENSMUSG00000059866.14	protein_coding	KI.vs.WT	yes
Adcy2	1.17257e+16	0.02583244090485327	0.0016985119496296462	4501002318947170	chr13	68768162	69147660	379499	-	ENSMUSG00000021536.8	protein_coding	KI.vs.WT	yes
Snx20	-0.5657789155787013	0.025934258556050197	0.0017066602883858146	5.50171e+16	chr8	89353191	89362756	9566	-	ENSMUSG00000031662.9	protein_coding	KI.vs.WT	yes
1700020L13Rik	-1.57594e+16	0.025939619036253803	0.00170910269412822	1.35454e+16	chr7	29979519	29989662	10144	+	ENSMUSG00000013928.14	protein_coding	KI.vs.WT	yes
Map3k3	-0.3290832736906785	0.025939619036253803	0.001709921075483995	6907866160930200	chr11	105975439	106046272	70834	+	ENSMUSG00000020700.12	protein_coding	KI.vs.WT	no
4833422M21Rik	3089815514037850	0.02600742884999778	0.0017158488652717146	0.02176848528838301	chr15	96129751	96152565	22815	-	ENSMUSG00000097619.9	lncRNA	KI.vs.WT	yes
Hnrnpa1	-0.40889361995483897	0.02603606058807975	0.0017193440757735485	7570932962497370	chr15	103148859	103155119	6261	+	ENSMUSG00000046434.17	protein_coding	KI.vs.WT	no
Kcnma1	0.7427445544677744	0.02603606058807975	0.0017206566946942842	6148345218627270	chr14	23339499	24064559	725061	-	ENSMUSG00000063142.16	protein_coding	KI.vs.WT	yes
Git2	-0.3401283806875375	0.026059381520324335	0.0017236586431604662	8032347194238480	chr5	114865468	114913578	48111	-	ENSMUSG00000041890.18	protein_coding	KI.vs.WT	no
Arhgef9	0.7523714563396822	0.026144916934698597	0.0017311482840466693	4846510434540180	chrX	94092541	94240462	147922	-	ENSMUSG00000025656.18	protein_coding	KI.vs.WT	yes
Stk35	-0.5049279502617795	0.026144916934698597	0.0017323788761015623	4082010030705380	chr2	129642437	129674207	31771	+	ENSMUSG00000037885.19	protein_coding	KI.vs.WT	yes
Cyth2	-0.49481458653804944	0.026144916934698597	0.0017337128213984552	5042503531519040	chr7	45456061	45464005	7945	-	ENSMUSG00000003269.19	protein_coding	KI.vs.WT	no
Tbc1d2b	-0.29453168867314755	0.026153657239033224	0.0017357584176578103	5789186118166970	chr9	90084080	90152857	68778	-	ENSMUSG00000037410.14	protein_coding	KI.vs.WT	no
Cdc45	-1262209256254910	0.026321938071329595	0.0017484022765989669	0.8571734706560485	chr16	18599197	18630737	31541	-	ENSMUSG00000000028.16	protein_coding	KI.vs.WT	yes
ENSMUSG00000120999	-0.7768362548189995	0.02647354805249892	0.0017599567259116435	3503974898563940	chr11	120524511	120525957	1447	+	ENSMUSG00000120999.1	lncRNA	KI.vs.WT	yes
Rcan1	-0.9365718846867291	0.0265124659388207	0.0017640301047858842	6123983837120210	chr16	92188841	92267755	78915	-	ENSMUSG00000022951.19	protein_coding	KI.vs.WT	yes
Ano4	1.74364e+16	0.026513549085435132	0.0017682184102214488	4279997217407590	chr10	88784856	89180624	395769	-	ENSMUSG00000035189.18	protein_coding	KI.vs.WT	yes
Gm45051	-1.65245e+16	0.026513549085435132	0.0017683831620238964	-0.6347557357993284	chr6	72324012	72325441	1430	-	ENSMUSG00000108435.2	lncRNA	KI.vs.WT	yes
Ackr1	253714021526462	0.026513549085435132	0.0017685607293535766	0.00646566094096937	chr1	173159453	173161317	1865	-	ENSMUSG00000037872.6	protein_coding	KI.vs.WT	yes
Gm43681	0.9292231036082633	0.02651360361234211	0.0017700505550616286	1.89691e+16	chr5	93331715	93333617	1903	-	ENSMUSG00000106870.2	TEC	KI.vs.WT	yes
5033417F24Rik	1.59066e+16	0.02669096085894987	0.0017833870708446325	0.3199026786694176	chr1	92836100	92838486	2387	-	ENSMUSG00000097251.3	lncRNA	KI.vs.WT	yes
2410022M11Rik	-1.25128e+16	0.026765222263952716	0.001789849224265448	2.01952e+16	chr14	57049446	57051356	1911	+	ENSMUSG00000100017.3	lncRNA	KI.vs.WT	yes
Pfkl	-0.4444868010636705	0.026813009892067294	0.0017945478593681809	5995760795813720	chr10	77822781	77845917	23137	-	ENSMUSG00000020277.11	protein_coding	KI.vs.WT	no
Frmd7	1.70878e+16	0.026908201451503244	0.0018033780643236339	3.37284e+16	chrX	49984057	50031587	47531	-	ENSMUSG00000036131.13	protein_coding	KI.vs.WT	yes
Usp46	0.4441634172241052	0.026908201451503244	0.0018039354784752176	4681147034976810	chr5	74159114	74229092	69979	-	ENSMUSG00000054814.15	protein_coding	KI.vs.WT	no
9630050E16Rik	2.57445e+16	0.02692923223921117	0.0018068548761398973	-0.19229133282063393	chr14	45722102	45729542	7441	-	ENSMUSG00000115275.2	TEC	KI.vs.WT	yes
Gm26621	1.63254e+16	0.026943011083289385	0.0018092896456155091	0.47600515873858246	chr15	68206564	68209279	2716	-	ENSMUSG00000096967.4	lncRNA	KI.vs.WT	yes
Lrrc7	1197706275363440	0.027078617071526218	0.0018199137818811623	5939503707326580	chr3	157788528	158267858	479331	-	ENSMUSG00000028176.14	protein_coding	KI.vs.WT	yes
H2-Q4	-1.05858e+16	0.02708430447891542	0.0018218142026176292	5561029161197640	chr17	35598593	35604266	5674	+	ENSMUSG00000035929.12	protein_coding	KI.vs.WT	yes
Osbpl3	0.9964942655624947	0.027088534620076883	0.0018236171568784942	4508437767514310	chr6	50270310	50433181	162872	-	ENSMUSG00000029822.16	protein_coding	KI.vs.WT	yes
Smndc1	-0.32154882522486794	0.02712246089043883	0.001827421412012751	5728141599497120	chr19	53367821	53379009	11189	-	ENSMUSG00000025024.8	protein_coding	KI.vs.WT	no
Nap1l5	0.8916926318963527	0.02719557034476639	0.0018345591485696387	3.23595e+16	chr6	58882218	58884061	1844	-	ENSMUSG00000055430.5	protein_coding	KI.vs.WT	yes
Cacna2d1	1.32938e+16	0.02719557034476639	0.0018353961151961174	4980853160635040	chr5	16139689	16579509	439821	+	ENSMUSG00000040118.16	protein_coding	KI.vs.WT	yes
D630030B08Rik	1.36386e+16	0.027215968940201164	0.0018382983505012556	1216267659442840	chr5	67990693	67994171	3479	-	ENSMUSG00000106837.2	TEC	KI.vs.WT	yes
Gm42616	1.84303e+16	0.027235965953078155	0.0018422433451112106	3.33723e+16	chr5	52032761	52036944	4184	-	ENSMUSG00000106010.2	TEC	KI.vs.WT	yes
Gm45872	-2022163024355390	0.027235965953078155	0.0018427024050092675	-0.10679815793558785	chr8	81454183	81455766	1584	-	ENSMUSG00000110142.2	TEC	KI.vs.WT	yes
Tsc22d3	-1.01861e+16	0.027356355605543805	0.0018537568809188685	6016212806941290	chrX	139440277	139501408	61132	-	ENSMUSG00000031431.14	protein_coding	KI.vs.WT	yes
Gm45342	1.77739e+16	0.027356355605543805	0.0018549625420690424	0.5411257012334996	chr8	26182173	26183535	1363	+	ENSMUSG00000109679.2	TEC	KI.vs.WT	yes
Papolb	2467396033815330	0.027356355605543805	0.0018554478858020182	-0.7120280677581758	chr5	142511593	142515831	4239	-	ENSMUSG00000074817.3	protein_coding	KI.vs.WT	yes
2610316D01Rik	1.90031e+16	0.027389114996791166	0.00185920505947949	1.2881e+16	chr3	45234625	45332726	98102	-	ENSMUSG00000097040.8	lncRNA	KI.vs.WT	yes
Camk4	1.01715e+16	0.027402063207204834	0.001861619989189028	2.37239e+16	chr18	33067984	33324281	256298	+	ENSMUSG00000038128.8	protein_coding	KI.vs.WT	yes
Nuak1	-0.4127110140196722	0.02743659422650108	0.0018671775166304396	7955344206763390	chr10	84206769	84276461	69693	-	ENSMUSG00000020032.15	protein_coding	KI.vs.WT	no
A930006K02Rik	-1.40908e+16	0.02743659422650108	0.0018672982410782577	0.4644296831078632	chr16	91261913	91267016	5104	+	ENSMUSG00000084866.4	lncRNA	KI.vs.WT	yes
Gm32699	-1.69504e+16	0.02743659422650108	0.0018685797076905162	0.9144854676067189	chr13	18118848	18120871	2024	+	ENSMUSG00000113528.3	TEC	KI.vs.WT	yes
Chd7	-0.3039943937013409	0.027449675977335736	0.0018712449320423446	7845866373213580	chr4	8690406	8867659	177254	+	ENSMUSG00000041235.13	protein_coding	KI.vs.WT	no
Meg3	1.46941e+16	0.027449675977335736	0.0018725479632521072	879183472440009	chr12	109506879	109538165	31287	+	ENSMUSG00000021268.19	lncRNA	KI.vs.WT	yes
Gm16701_ENSMUSG00000097823.3	2.33683e+16	0.027466465779033486	0.0018752329214609183	0.2174589189001648	chr1	166825864	166828410	2547	-	ENSMUSG00000097823.3	lncRNA	KI.vs.WT	yes
Patl1	-0.405788364907129	0.02756826281537794	0.0018837282719700507	5522138576104460	chr19	11889763	11922455	32693	+	ENSMUSG00000046139.9	protein_coding	KI.vs.WT	no
Cdkn1a	-1.00156e+16	0.02758186805309402	0.0018862039812093446	405222214787513	chr17	29309950	29319701	9752	+	ENSMUSG00000023067.15	protein_coding	KI.vs.WT	yes
Rapgefl1	1067479651420710	0.027670303741410364	0.0018938027392523574	3.33563e+16	chr11	98727611	98744523	16913	+	ENSMUSG00000038020.6	protein_coding	KI.vs.WT	yes
Gm44639	2268036423853550	0.027758869182810522	0.001901420299405519	0.20105517345509205	chr7	78927515	78930523	3009	+	ENSMUSG00000108521.2	TEC	KI.vs.WT	yes
Setbp1	0.7504026484278766	0.027810776086907674	0.0019065347059578524	5575175302849960	chr18	78793595	79152606	359012	-	ENSMUSG00000024548.12	protein_coding	KI.vs.WT	yes
Tagap	-1.00034e+16	0.027820933235845852	0.0019087904865849397	7444341300428430	chr17	8144832	8153729	8898	+	ENSMUSG00000033450.9	protein_coding	KI.vs.WT	yes
ENSMUSG00000120169	-1802673510260790	0.027826984893453054	0.001910765498569506	0.9748369018783315	chr9	25161617	25163752	2136	-	ENSMUSG00000120169.1	lncRNA	KI.vs.WT	yes
Lacc1	-0.4833323391335653	0.02794588277456522	0.001920613818472587	6147244967132010	chr14	77261640	77274344	12705	-	ENSMUSG00000044350.15	protein_coding	KI.vs.WT	no
Mir124a-1hg	1.39294e+16	0.02794588277456522	0.0019220626773762065	5661193791771440	chr14	64824744	64831410	6667	+	ENSMUSG00000097545.9	lncRNA	KI.vs.WT	yes
Rragd	0.4751443395215864	0.027967542282525	0.0019251200629451066	450330512623685	chr4	32983037	33022180	39144	+	ENSMUSG00000028278.15	protein_coding	KI.vs.WT	no
3110056K07Rik	-0.7958392023883504	0.02797562056645087	0.0019272442643591993	2311564515245160	chr12	71038389	71062606	24218	-	ENSMUSG00000085622.10	lncRNA	KI.vs.WT	yes
Slc36a1	-0.36341714669156044	0.028163167707064715	0.0019432499213542316	6045257467170060	chr11	55095176	55127156	31981	+	ENSMUSG00000020261.16	protein_coding	KI.vs.WT	no
Chd4	-0.23702265477490436	0.028163167707064715	0.0019434660435273796	9009629953698020	chr6	125072944	125107554	34611	+	ENSMUSG00000063870.13	protein_coding	KI.vs.WT	no
Sap130	-0.31938632914591797	0.028163167707064715	0.0019482736914518052	5597975903363280	chr18	31767424	31856114	88691	+	ENSMUSG00000024260.15	protein_coding	KI.vs.WT	no
Ppp1r1a	0.8421587069171287	0.028163167707064715	0.0019483101732385246	266016375249544	chr15	103438706	103446430	7725	-	ENSMUSG00000022490.8	protein_coding	KI.vs.WT	yes
Gm5547	-1.59263e+16	0.028163167707064715	0.0019488067933149296	2.65863e+16	chr3	105722842	105724675	1834	+	ENSMUSG00000104835.6	lncRNA	KI.vs.WT	yes
Vstm2l	1.77412e+16	0.028163167707064715	0.0019496363294969129	0.8396306861923127	chr2	157756573	157786639	30067	+	ENSMUSG00000037843.7	protein_coding	KI.vs.WT	yes
Snap91	0.8355153216560322	0.028203591063934837	0.001954919880648284	4422952714552960	chr9	86647976	86762707	114732	-	ENSMUSG00000033419.17	protein_coding	KI.vs.WT	yes
Flcn	-0.5004689978917268	0.028203591063934837	0.0019555965328524323	6444213193624500	chr11	59682234	59700842	18609	-	ENSMUSG00000032633.13	protein_coding	KI.vs.WT	yes
Pan3	-0.28383174431118063	0.028204449652816196	0.0019572370330822003	7456026935705990	chr5	147366971	147485312	118342	+	ENSMUSG00000029647.16	protein_coding	KI.vs.WT	no
Gm38263	2921730688906140	0.028211683865927335	0.001960805210196015	0.017833694103861823	chr1	123487112	123490170	3059	-	ENSMUSG00000102902.2	TEC	KI.vs.WT	yes
Trp53inp2	-0.5793225140134257	0.028211683865927335	0.0019616124231008063	5247933842179360	chr2	155222979	155231770	8792	+	ENSMUSG00000038375.16	protein_coding	KI.vs.WT	yes
Trim17	1.641e+16	0.028211683865927335	0.00196248316578564	1.62384e+16	chr11	58845511	58863924	18414	+	ENSMUSG00000036964.15	protein_coding	KI.vs.WT	yes
Adrb1	-1.27283e+16	0.028243545717617644	0.0019662827231659817	5217353416288220	chr19	56710631	56721545	10915	+	ENSMUSG00000035283.6	protein_coding	KI.vs.WT	yes
Gm38158	1691726791774110	0.02859421135909035	0.001992298470815544	0.15513042162819682	chr1	176663290	176663628	339	+	ENSMUSG00000103367.2	processed_pseudogene	KI.vs.WT	yes
Ly9	-0.5000754915749608	0.028617072257398145	0.0019954953973208124	4731264361368400	chr1	171416192	171434978	18787	-	ENSMUSG00000004707.15	protein_coding	KI.vs.WT	yes
H3c7	-1377786760508130	0.028734866164371965	0.002005384980642869	1.8841e+16	chr13	23728222	23729482	1261	+	ENSMUSG00000100210.3	protein_coding	KI.vs.WT	yes
A630001O12Rik	-1768536136442950	0.028734866164371965	0.002006930674933154	1.48481e+16	chr8	127565983	127578223	12241	+	ENSMUSG00000110498.2	lncRNA	KI.vs.WT	yes
Cacnb4	0.6740688339959131	0.02874274043043162	0.0020090917778446318	4.24369e+16	chr2	52318332	52566843	248512	-	ENSMUSG00000017412.16	protein_coding	KI.vs.WT	yes
Hdac9	0.5801956501579988	0.028800958781442752	0.0020154891886283127	5834996451797730	chr12	34097579	34967094	869516	-	ENSMUSG00000004698.12	protein_coding	KI.vs.WT	yes
Gm28707	-1.95516e+16	0.028800958781442752	0.0020163899954048206	0.5878282110520066	chr13	42202810	42203763	954	+	ENSMUSG00000100071.2	lncRNA	KI.vs.WT	yes
Gm10209	-1.86021e+16	0.02886700693280357	0.0020234017581320513	0.4610778502306409	chr6	56774576	56776182	1607	+	ENSMUSG00000108080.2	TEC	KI.vs.WT	yes
Bmp2	-1.28209e+16	0.02886700693280357	0.002024250317989757	2.57606e+16	chr2	133394079	133404805	10727	+	ENSMUSG00000027358.7	protein_coding	KI.vs.WT	yes
Lrrc49	0.8741291038193317	0.028934562270774566	0.0020308835888242435	3056557506748280	chr9	60476142	60595441	119300	-	ENSMUSG00000047766.16	protein_coding	KI.vs.WT	yes
Kbtbd7	-0.44518646552867963	0.028934562270774566	0.0020329873775073296	4848624000756060	chr14	79663951	79668476	4526	+	ENSMUSG00000043881.10	protein_coding	KI.vs.WT	no
Epha3	1326865441791240	0.028934562270774566	0.002033853199974849	2.79052e+16	chr16	63363897	63684538	320642	-	ENSMUSG00000052504.8	protein_coding	KI.vs.WT	yes
ENSMUSG00000120198	-1407873767871730	0.028996292519538915	0.0020398176632298957	0.6932128314503119	chr16	49668598	49675964	7367	-	ENSMUSG00000120198.1	lncRNA	KI.vs.WT	yes
Itgb1bp2	1.97284e+16	0.029033123124405622	0.0020446509735538533	-0.24067921162005035	chrX	100492694	100497147	4454	+	ENSMUSG00000031312.6	protein_coding	KI.vs.WT	yes
Zic4	1.51379e+16	0.029033123124405622	0.002046063549705985	0.48392060850283936	chr9	91244466	91271401	26936	+	ENSMUSG00000036972.15	protein_coding	KI.vs.WT	yes
2500002B13Rik	-1912725303330540	0.029033123124405622	0.002047652922121313	0.44979801909534184	chr8	57940551	57963975	23425	+	ENSMUSG00000096917.4	lncRNA	KI.vs.WT	yes
R3hdm1	0.8780322281545362	0.029033123124405622	0.0020501598653668053	7038509879994540	chr1	128031038	128165473	134436	+	ENSMUSG00000056211.14	protein_coding	KI.vs.WT	yes
Bcl11b	0.6979256069093558	0.029033123124405622	0.0020505456915219217	4093062647828090	chr12	107876662	107969861	93200	-	ENSMUSG00000048251.16	protein_coding	KI.vs.WT	yes
Gm48796	1.53271e+16	0.02911793615020299	0.0020581680204823974	0.261001860852667	chr9	27009847	27013639	3793	+	ENSMUSG00000111390.2	lncRNA	KI.vs.WT	yes
Pop7	-0.8528086739818678	0.029270537576697484	0.0020705952030152593	1.9415e+16	chr5	137499700	137500780	1081	-	ENSMUSG00000029715.6	protein_coding	KI.vs.WT	yes
Cdc37l1	0.3841956644698107	0.029319197415345687	0.0020774874486931454	5584038378098010	chr19	28967752	29004081	36330	+	ENSMUSG00000024780.8	protein_coding	KI.vs.WT	no
Gm37077	3.06628e+16	0.029319197415345687	0.002078151607284684	0.3775931453982872	chr1	25794424	25798114	3691	-	ENSMUSG00000102659.2	TEC	KI.vs.WT	yes
Gm26777	1.81735e+16	0.029319197415345687	0.0020789677539468773	-0.06093417583686051	chr12	80556725	80565690	8966	-	ENSMUSG00000097801.2	lncRNA	KI.vs.WT	yes
Csdc2	0.7017172227852736	0.029333448770709026	0.0020816225416882077	5075507042750060	chr15	81820960	81835142	14183	+	ENSMUSG00000042109.9	protein_coding	KI.vs.WT	yes
Lgr4	0.7966942976641006	0.029371576428378746	0.002085974626387661	3730492869610670	chr2	109747992	109844602	96611	+	ENSMUSG00000050199.14	protein_coding	KI.vs.WT	yes
ENSMUSG00000120598	-1.34299e+16	0.02945939689050874	0.0020938629628455764	2123380754684380	chr12	69585043	69585482	440	+	ENSMUSG00000120598.1	lncRNA	KI.vs.WT	yes
Wbp11	-0.378693127891586	0.029476918891304955	0.0020986893874256414	5.99987e+16	chr6	136790652	136805231	14580	-	ENSMUSG00000030216.13	protein_coding	KI.vs.WT	no
5330406M23Rik	-0.6792607007340172	0.029476918891304955	0.0020990105449814316	4166856258822450	chr6	31085762	31087855	2094	-	ENSMUSG00000104030.2	TEC	KI.vs.WT	yes
Il10	-2.4806e+16	0.029476918891304955	0.0021000652416394952	-0.47026771417965657	chr1	130947582	130952711	5130	+	ENSMUSG00000016529.6	protein_coding	KI.vs.WT	yes
Wipf1	-0.28111682699877655	0.029545082957310436	0.0021065776637723584	7223796947110710	chr2	73259954	73360078	100125	-	ENSMUSG00000075284.11	protein_coding	KI.vs.WT	no
ENSMUSG00000120354	-2.34327e+16	0.029686895470613376	0.0021183530232113694	0.3059256619442751	chr4	155319950	155321022	1073	+	ENSMUSG00000120354.1	lncRNA	KI.vs.WT	yes
Gm42872	2115037993748990	0.02978774111585588	0.002127697067682675	-0.9303926891069593	chr3	132473168	132475134	1967	+	ENSMUSG00000105719.2	TEC	KI.vs.WT	yes
Gm45110	18607151033468	0.02978774111585588	0.0021288884485827493	0.948708848442707	chr7	127054641	127056042	1402	+	ENSMUSG00000108465.2	TEC	KI.vs.WT	yes
Gm48207	2.47352e+16	0.029818224094052808	0.0021327384497764226	-0.20634403630093046	chr10	105368845	105370354	1510	-	ENSMUSG00000112571.2	TEC	KI.vs.WT	yes
A930036I15Rik	2.04465e+16	0.029976959335748718	0.002145772257385152	0.7621756872092174	chr3	126760124	126761168	1045	-	ENSMUSG00000105469.2	TEC	KI.vs.WT	yes
ENSMUSG00000120347	-1.83418e+16	0.029982983013246374	0.0021478840970251606	0.3331556234002773	chr16	11072336	11072801	466	+	ENSMUSG00000120347.1	lncRNA	KI.vs.WT	yes
Pnkd	0.6591023974488347	0.03000996773265463	0.002151499368277201	3.76933e+16	chr1	74324089	74392853	68765	+	ENSMUSG00000026179.15	protein_coding	KI.vs.WT	yes
Stk11ip	-0.3414973501099982	0.030088407506963268	0.002158809507226064	5233242277216940	chr1	75498173	75513979	15807	+	ENSMUSG00000026213.16	protein_coding	KI.vs.WT	no
A730091E23Rik	-2.09747e+16	0.030092883724420018	0.0021608174916469755	-0.34443445125954997	chr13	32522802	32526626	3825	+	ENSMUSG00000113965.2	TEC	KI.vs.WT	yes
Gm45204	1693416133123930	0.03018554784213273	0.002169163247399897	1.36619e+16	chr7	127411326	127412679	1354	-	ENSMUSG00000108808.2	TEC	KI.vs.WT	yes
Ncf2	-0.3909901061196462	0.030214950820139728	0.002172969837569466	771054731666494	chr1	152675945	152712742	36798	+	ENSMUSG00000026480.13	protein_coding	KI.vs.WT	no
ENSMUSG00000121168	-1.38329e+16	0.03023075495808857	0.002178351167017917	0.7229432718761181	chr5	105841570	105844003	2434	-	ENSMUSG00000121168.1	lncRNA	KI.vs.WT	yes
Ccl4	-1.53329e+16	0.03023075495808857	0.002180246805941394	8280453172526670	chr11	83553410	83555509	2100	+	ENSMUSG00000018930.4	protein_coding	KI.vs.WT	yes
Fam169a	1.15033e+16	0.03023075495808857	0.0021812503819788557	2.00551e+16	chr13	97203794	97267521	63728	+	ENSMUSG00000041817.15	protein_coding	KI.vs.WT	yes
Ube2ql1	0.7651870121838735	0.03023075495808857	0.002181398978402304	3813025958049750	chr13	69850951	69888008	37058	-	ENSMUSG00000052981.7	protein_coding	KI.vs.WT	yes
4833411C07Rik	-0.782828997963929	0.03023075495808857	0.0021825791696198473	2.74447e+16	chr8	10949871	10973631	23761	+	ENSMUSG00000109089.3	lncRNA	KI.vs.WT	yes
Zfp853	1.65392e+16	0.030248286972632224	0.002185888749009371	0.31423378511186006	chr5	143272793	143279378	6586	-	ENSMUSG00000093910.3	protein_coding	KI.vs.WT	yes
Tmem104	-0.49162744657811575	0.030248286972632224	0.002187235997460514	6533749692837040	chr11	115078313	115137849	59537	+	ENSMUSG00000045980.14	protein_coding	KI.vs.WT	no
Slc39a12	-0.6073863158941051	0.03031435182352757	0.002193712343283301	3294620620543190	chr2	14393127	14499788	106662	+	ENSMUSG00000036949.17	protein_coding	KI.vs.WT	yes
Cpa6	1.89221e+16	0.030353088566922943	0.0021982169522681864	2941637053451610	chr1	10394945	10790170	395226	-	ENSMUSG00000042501.13	protein_coding	KI.vs.WT	yes
Numbl	0.9802057950820899	0.0303972663638663	0.0022045115924820623	319901681237141	chr7	26957858	26981569	23712	+	ENSMUSG00000063160.13	protein_coding	KI.vs.WT	yes
A130050O07Rik	1.68407e+16	0.0303972663638663	0.0022048241409665355	1.27077e+16	chr1	137854989	137858011	3023	+	ENSMUSG00000102277.2	TEC	KI.vs.WT	yes
ENSMUSG00000120675	-1.36891e+16	0.030423318235410557	0.00220841912078793	1558400342621110	chr6	117856961	117861556	4596	+	ENSMUSG00000120675.1	lncRNA	KI.vs.WT	yes
Arap1	-0.2584286383004706	0.03043198459047888	0.002210754037514609	7762345955896780	chr7	100997274	101061793	64520	+	ENSMUSG00000032812.19	protein_coding	KI.vs.WT	no
Hnrnpdl	-0.5869154681963734	0.030470702992015503	0.0022164941255333344	6648936284892140	chr5	100181436	100187523	6088	-	ENSMUSG00000029328.16	protein_coding	KI.vs.WT	yes
Gm44434	1.54467e+16	0.030470702992015503	0.002216982762535657	-0.04737421673006352	chr6	52576486	52580230	3745	-	ENSMUSG00000107813.2	TEC	KI.vs.WT	yes
Zbtb21	-0.383396721788732	0.030569177202478735	0.0022283223617566355	4631904964049240	chr16	97744557	97763822	19266	-	ENSMUSG00000046962.17	protein_coding	KI.vs.WT	no
Gm18981	2.03223e+16	0.030569177202478735	0.002228790659645362	1277530023965700	chr6	118594587	118596185	1599	-	ENSMUSG00000100867.2	processed_pseudogene	KI.vs.WT	yes
Cadm3	1.22309e+16	0.030569177202478735	0.0022292880908309884	4.43688e+16	chr1	173160825	173195261	34437	-	ENSMUSG00000005338.15	protein_coding	KI.vs.WT	yes
1700065D16Rik	-1.68114e+16	0.030679822491672004	0.0022398095086059353	0.7821023868797897	chr9	95737471	95740375	2905	-	ENSMUSG00000096655.3	lncRNA	KI.vs.WT	yes
ENSMUSG00000121050	1169856275894570	0.030679822491672004	0.0022407964521664026	1.35502e+16	chr9	62252176	62254041	1866	+	ENSMUSG00000121050.1	lncRNA	KI.vs.WT	yes
Gm12568	2224102246432880	0.030809391518459312	0.0022557142660351737	-0.03361289364442466	chr11	46134398	46135021	624	-	ENSMUSG00000081078.2	processed_pseudogene	KI.vs.WT	yes
Gm43889	2.63135e+16	0.030809391518459312	0.0022559590434477993	0.7806316618684562	chr6	45180744	45184424	3681	+	ENSMUSG00000108146.2	TEC	KI.vs.WT	yes
1700018M17Rik	-2082430009105760	0.030809391518459312	0.002256604211132717	0.7591056145927786	chr4	59549154	59549625	472	+	ENSMUSG00000046145.8	pseudogene	KI.vs.WT	yes
Toe1	-0.5479492316147017	0.030809391518459312	0.002257167865169637	3452562422946420	chr4	116651507	116664837	13331	-	ENSMUSG00000028688.14	protein_coding	KI.vs.WT	yes
Lhfpl4	1.10562e+16	0.030835250494767687	0.0022622366753106303	3362734295210590	chr6	113145051	113172345	27295	-	ENSMUSG00000042873.12	protein_coding	KI.vs.WT	yes
1700064M15Rik	-1.90658e+16	0.030835250494767687	0.002262519220720342	-0.11771294331926964	chr12	99592312	99594233	1922	-	ENSMUSG00000100211.2	lncRNA	KI.vs.WT	yes
Gm44679	3053966033291110	0.030838710918010305	0.0022645017546296803	0.5722469427074829	chr7	91168323	91171230	2908	+	ENSMUSG00000109320.2	TEC	KI.vs.WT	yes
Chrm1	1.1229e+16	0.03087530111289354	0.0022689192690024344	3.3146e+16	chr19	8641153	8660951	19799	+	ENSMUSG00000032773.10	protein_coding	KI.vs.WT	yes
BC051537	-2001855243748360	0.030911576398141235	0.002273665788533752	0.13408203816936823	chr17	34302817	34314283	11467	-	ENSMUSG00000098197.3	lncRNA	KI.vs.WT	yes
Gm43589	-2.42643e+16	0.030911576398141235	0.0022757347701525283	0.6251172332305062	chr3	59177207	59178729	1523	+	ENSMUSG00000104550.2	TEC	KI.vs.WT	yes
Zscan25	0.5832898208856856	0.030911576398141235	0.0022767831495043487	3525921206902550	chr5	145217310	145228088	10779	+	ENSMUSG00000070420.5	protein_coding	KI.vs.WT	yes
ENSMUSG00000120406	-1.75689e+16	0.030959145560682605	0.0022820222204202704	0.6651176348924217	chr18	80513339	80513846	508	+	ENSMUSG00000120406.1	lncRNA	KI.vs.WT	yes
Camk2n2	1258183565965770	0.031042586712213986	0.0022899127866184755	0.9733715372257169	chr16	20437965	20440037	2073	-	ENSMUSG00000051146.4	protein_coding	KI.vs.WT	yes
Aak1	0.31512278941726485	0.03124467967066506	0.002306571924118043	6831311253232650	chr6	86826499	86980205	153707	+	ENSMUSG00000057230.15	protein_coding	KI.vs.WT	no
Gm42692	2.34688e+16	0.03132898694314782	0.0023145518380643963	1.21984e+16	chr3	34697413	34700245	2833	+	ENSMUSG00000104901.2	TEC	KI.vs.WT	yes
Spaca6	1.55025e+16	0.0313915234560001	0.0023212900039451378	4646465333963440	chr17	18047420	18063271	15852	+	ENSMUSG00000080316.12	protein_coding	KI.vs.WT	yes
C230086J09Rik	2.60327e+16	0.0313915234560001	0.002322691197417048	-0.26681655285018163	chr14	94034577	94038609	4033	-	ENSMUSG00000115471.2	TEC	KI.vs.WT	yes
Gsdmd	-0.43750011180392745	0.03154296849701174	0.0023356648758157236	5752317859954640	chr15	75734176	75739257	5082	+	ENSMUSG00000022575.6	protein_coding	KI.vs.WT	no
Zkscan2	1.71639e+16	0.0316301136619725	0.0023438907097044644	2.90033e+16	chr7	123074607	123099672	25066	-	ENSMUSG00000030757.14	protein_coding	KI.vs.WT	yes
Camsap1	-0.29886086022133757	0.031679533223293296	0.002349328612915753	6562545268250960	chr2	25816850	25873294	56445	-	ENSMUSG00000026933.18	protein_coding	KI.vs.WT	no
Clec4b1	2.31783e+16	0.03178051878023546	0.0023585990395197168	-0.6040352769986992	chr6	123026921	123048514	21594	+	ENSMUSG00000030147.13	protein_coding	KI.vs.WT	yes
Gm16023	-1.04725e+16	0.031829699966323025	0.0023640332093821754	1233459044365580	chr4	155692757	155709214	16458	-	ENSMUSG00000086682.3	lncRNA	KI.vs.WT	yes
Gm49069	1.91008e+16	0.031891599257492645	0.002370418195932469	1.30302e+16	chr14	124845894	124849904	4011	-	ENSMUSG00000114970.2	TEC	KI.vs.WT	yes
Esr1	-0.6276406486805366	0.03190333074658283	0.0023730784697710435	3.12617e+16	chr10	4561593	4955614	394022	+	ENSMUSG00000019768.17	protein_coding	KI.vs.WT	yes
Gm43066	2.08775e+16	0.031908887413408006	0.0023800282815832643	1.4909e+16	chr3	103509259	103510518	1260	+	ENSMUSG00000104764.2	lncRNA	KI.vs.WT	yes
Rasgrp2	1.07467e+16	0.031908887413408006	0.002380095057630047	2.8113e+16	chr19	6449370	6465246	15877	+	ENSMUSG00000032946.17	protein_coding	KI.vs.WT	yes
Tpm3	-0.34489518908769784	0.031908887413408006	0.0023804343838447683	8940225123150380	chr3	89979956	90008209	28254	+	ENSMUSG00000027940.19	protein_coding	KI.vs.WT	no
ENSMUSG00000120606	2.45855e+16	0.031908887413408006	0.002384600342129969	0.014830933295835961	chr14	64811836	64813028	1193	+	ENSMUSG00000120606.1	lncRNA	KI.vs.WT	yes
Slitrk3	1.69287e+16	0.031908887413408006	0.002384956701763498	1.79818e+16	chr3	72954598	72965136	10539	-	ENSMUSG00000048304.9	protein_coding	KI.vs.WT	yes
Gm37747	1.77835e+16	0.031908887413408006	0.002385735783764077	0.6004751100099053	chr2	68819725	68823727	4003	+	ENSMUSG00000104262.2	TEC	KI.vs.WT	yes
Hdx	1.9577e+16	0.031908887413408006	0.002386012096944298	0.07166425539221277	chrX	110479628	110606776	127149	-	ENSMUSG00000034551.13	protein_coding	KI.vs.WT	yes
Grm5	1313095997825500	0.031931231925779215	0.002390223027783834	3.89994e+16	chr7	87233376	87784115	550740	+	ENSMUSG00000049583.16	protein_coding	KI.vs.WT	yes
B4galt2	1.0899e+16	0.031931231925779215	0.002391432846333997	1.89813e+16	chr4	117726457	117740684	14228	-	ENSMUSG00000028541.15	protein_coding	KI.vs.WT	yes
Tnik	1.11619e+16	0.031931231925779215	0.0023930525271730276	7265385480469210	chr3	28317363	28730007	412645	+	ENSMUSG00000027692.17	protein_coding	KI.vs.WT	yes
Gm44769	2.28603e+16	0.03210381962620529	0.00240880158918378	0.012670883878933838	chr6	71767652	71770460	2809	+	ENSMUSG00000108802.2	TEC	KI.vs.WT	yes
Irf3	-0.3537235395857505	0.03210381962620529	0.0024100410499822574	4594457137429100	chr7	44647072	44652272	5201	+	ENSMUSG00000003184.16	protein_coding	KI.vs.WT	no
ENSMUSG00000120632	-1.62771e+16	0.03210381962620529	0.0024113855548831323	0.8224043934963402	chr2	44817367	44819855	2489	+	ENSMUSG00000120632.1	lncRNA	KI.vs.WT	yes
Acyp1	-0.9626279225291184	0.03214514053529824	0.0024162911131073396	2235460136593320	chr12	85319172	85335212	16041	-	ENSMUSG00000008822.16	protein_coding	KI.vs.WT	yes
Gm14776	1.73796e+16	0.03216496811196818	0.0024211341586759033	2536277442902570	chrX	86814945	86815958	1014	-	ENSMUSG00000083421.2	processed_pseudogene	KI.vs.WT	yes
Prickle1	0.588334160115869	0.03216496811196818	0.0024213874537204745	4073051702160500	chr15	93396995	93493772	96778	-	ENSMUSG00000036158.13	protein_coding	KI.vs.WT	yes
Adamts3	1.32669e+16	0.032246102714341245	0.0024293028053853495	2780238941953640	chr5	89824946	90031193	206248	-	ENSMUSG00000043635.13	protein_coding	KI.vs.WT	yes
Slco5a1	1.57913e+16	0.03229321176219012	0.0024346619854341764	3.42336e+16	chr1	12936773	13062874	126102	-	ENSMUSG00000025938.17	protein_coding	KI.vs.WT	yes
Napb	0.5412249473715197	0.03250453424621012	0.002453803423032164	4783557796446270	chr2	148535905	148574387	38483	-	ENSMUSG00000027438.15	protein_coding	KI.vs.WT	yes
Tubb4b	-0.5096212747468511	0.03250453424621012	0.002456930987805333	5116999869298360	chr2	25112172	25114714	2543	-	ENSMUSG00000036752.5	protein_coding	KI.vs.WT	yes
Gm45242	-2.03775e+16	0.03250453424621012	0.002457111949453092	-0.31933195303392775	chr8	65398242	65400370	2129	-	ENSMUSG00000110378.2	TEC	KI.vs.WT	yes
ENSMUSG00000120372	-2.06843e+16	0.03250453424621012	0.0024619268647592027	-0.14573040477624405	chr1	7158447	7159048	602	-	ENSMUSG00000120372.1	lncRNA	KI.vs.WT	yes
Wee1	1.00645e+16	0.03250453424621012	0.0024626246033279888	1.92809e+16	chr7	109721253	109742493	21241	+	ENSMUSG00000031016.10	protein_coding	KI.vs.WT	yes
Syt17	1.60086e+16	0.03250453424621012	0.002462668259572312	0.5425841946028256	chr7	117979940	118047445	67506	-	ENSMUSG00000058420.9	protein_coding	KI.vs.WT	yes
Sema3e	0.9851880547203348	0.03250453424621012	0.0024638642198971886	2481130277138260	chr5	14075290	14306703	231414	+	ENSMUSG00000063531.8	protein_coding	KI.vs.WT	yes
Magi2	1027844163280820	0.03250453424621012	0.002465170114076362	47269387846371	chr5	19432034	20909790	1477757	+	ENSMUSG00000040003.19	protein_coding	KI.vs.WT	yes
Kcnab3	0.9279017803347228	0.032540058200585524	0.002469688273743991	3.57737e+16	chr11	69217084	69223868	6785	+	ENSMUSG00000018470.9	protein_coding	KI.vs.WT	yes
Hdac4	0.6235194668791928	0.032596953606540156	0.0024758336399586275	6205879154011180	chr1	91856501	92123421	266921	-	ENSMUSG00000026313.17	protein_coding	KI.vs.WT	yes
Gm20655	-2238048393882470	0.032633793226626344	0.0024815221075534144	0.2581844557429104	chr10	17666270	17675669	9400	-	ENSMUSG00000093672.3	lncRNA	KI.vs.WT	yes
Lrp8	1.07686e+16	0.032633793226626344	0.0024822902134827326	5970668441299420	chr4	107659066	107734037	74972	+	ENSMUSG00000028613.16	protein_coding	KI.vs.WT	yes
Ticam1	-0.5664951252219659	0.03273545865728926	0.002492734072157516	4133990056766680	chr17	56576319	56583786	7468	-	ENSMUSG00000047123.9	protein_coding	KI.vs.WT	yes
Il1rapl1	1.70219e+16	0.03273545865728926	0.0024952470593148876	2.57264e+16	chrX	85784476	87159251	1374776	-	ENSMUSG00000052372.11	protein_coding	KI.vs.WT	yes
Sv2a	0.7025545283375997	0.03273545865728926	0.0024955282384480602	526315087157236	chr3	96088467	96102837	14371	+	ENSMUSG00000038486.10	protein_coding	KI.vs.WT	yes
Phtf1os	-1.9276e+16	0.03277162877995456	0.002500122576766713	0.3049959416022931	chr3	103871852	103875897	4046	-	ENSMUSG00000089998.3	lncRNA	KI.vs.WT	yes
ENSMUSG00000120306	-1.68761e+16	0.03287754213132473	0.00251004553715607	3.38089e+16	chr4	55650543	55651215	673	-	ENSMUSG00000120306.1	lncRNA	KI.vs.WT	yes
Ank3	1.13786e+16	0.03293125175399542	0.0025159919361376548	7.39277e+16	chr10	69234603	69863268	628666	+	ENSMUSG00000069601.15	protein_coding	KI.vs.WT	yes
Anks1	-0.33568045082946174	0.033039649560713966	0.002526125672691359	642455868407727	chr17	28128280	28281749	153470	+	ENSMUSG00000024219.17	protein_coding	KI.vs.WT	no
Gm45203	1.60216e+16	0.033059379520398814	0.002531649787183824	0.7216353576958795	chr7	79760552	79762382	1831	-	ENSMUSG00000108494.2	TEC	KI.vs.WT	yes
Syn2	0.8882321661844775	0.033059379520398814	0.0025324932496674	495599057868007	chr6	115111863	115258967	147105	+	ENSMUSG00000009394.14	protein_coding	KI.vs.WT	yes
Pnpla2	-0.5673824545758649	0.033059379520398814	0.002533193486792891	589945787988613	chr7	141035111	141040656	5546	+	ENSMUSG00000025509.16	protein_coding	KI.vs.WT	yes
Gm19510	-2.42919e+16	0.033155288638532884	0.0025427965341845707	0.23035745353343945	chr15	59660266	59666808	6543	-	ENSMUSG00000115426.2	lncRNA	KI.vs.WT	yes
Gm56159	2110089804916170	0.033155288638532884	0.0025442595373403316	-0.9285608527352248	chr2	156806078	156806213	136	-	ENSMUSG00002074935.1	scaRNA	KI.vs.WT	yes
4930481B07Rik	-1747896854954100	0.033217151670408	0.002551437574765769	0.8629452616964617	chr3	94922936	94927449	4514	+	ENSMUSG00000085956.3	lncRNA	KI.vs.WT	yes
Dnm3	0.8909173448698556	0.033217151670408	0.0025527306580790006	4504209063637580	chr1	161810022	162305603	495582	-	ENSMUSG00000040265.17	protein_coding	KI.vs.WT	yes
Amph	0.7490561155089288	0.03328297651317715	0.0025596549201838035	4565940362043340	chr13	19132375	19335091	202717	+	ENSMUSG00000021314.14	protein_coding	KI.vs.WT	yes
Il1a	-1.64828e+16	0.03335602729299379	0.002568856218963142	7430719314321400	chr2	129141530	129151892	10363	-	ENSMUSG00000027399.2	protein_coding	KI.vs.WT	yes
Gm50240	-1.0808e+16	0.03335602729299379	0.002570139069500708	1.79819e+16	chr17	30795274	30801568	6295	+	ENSMUSG00000117725.2	lncRNA	KI.vs.WT	yes
Tenm3	1081566813047150	0.03335602729299379	0.0025708821484230083	6154838955101480	chr8	48680717	49296986	616270	-	ENSMUSG00000031561.17	protein_coding	KI.vs.WT	yes
Pex5l	0.9820664698723783	0.03352818392529224	0.0025860303296637963	3.10608e+16	chr3	33003557	33197396	193840	-	ENSMUSG00000027674.17	protein_coding	KI.vs.WT	yes
Ftl1	-0.4267450801775013	0.03353365815733164	0.002588639481488302	8512631478308540	chr7	45107368	45109308	1941	-	ENSMUSG00000050708.17	protein_coding	KI.vs.WT	no
Gm17494	1.39872e+16	0.03353365815733164	0.0025902119361436663	1.62539e+16	chr3	122049607	122087369	37763	-	ENSMUSG00000057359.8	lncRNA	KI.vs.WT	yes
Rars	-0.4147837502953777	0.033670158005564534	0.002602642818927886	5165860202431600	chr11	35699208	35725333	26126	-	ENSMUSG00000018848.5	protein_coding	KI.vs.WT	no
Tpbg	1.15775e+16	0.03381666996870558	0.0026158634841263284	1.08001e+16	chr9	85724433	85729093	4661	+	ENSMUSG00000035274.14	protein_coding	KI.vs.WT	yes
Ptprn2	0.9613488212526183	0.03382964188942604	0.0026187631978305693	4847432857627270	chr12	116449340	117240469	791130	+	ENSMUSG00000056553.15	protein_coding	KI.vs.WT	yes
Slc25a27	1.15493e+16	0.03385173176451045	0.0026223707005915606	2.54024e+16	chr17	43952782	43978105	25324	-	ENSMUSG00000023912.11	protein_coding	KI.vs.WT	yes
Gm43445	2.67612e+16	0.03390838117309651	0.002630402127126016	-0.5370837030629068	chr3	143902933	143905023	2091	-	ENSMUSG00000104969.2	lncRNA	KI.vs.WT	yes
Klhl20	0.43407078383345843	0.03390838117309651	0.002630560512531702	4140858792022600	chr1	160915945	160959081	43137	-	ENSMUSG00000026705.17	protein_coding	KI.vs.WT	no
Dlg2	0.9130031833023381	0.03391407157176663	0.0026329029779650665	5784831048019480	chr7	90125880	92098455	1972576	+	ENSMUSG00000052572.20	protein_coding	KI.vs.WT	yes
Etv3	-0.506406629832254	0.033915511298308075	0.002638269716758606	6.73319e+16	chr3	87432714	87447463	14750	+	ENSMUSG00000003382.19	protein_coding	KI.vs.WT	yes
Gm47503	1.88126e+16	0.033915511298308075	0.002639079691884005	-0.6227561583258769	chr10	45533051	45538008	4958	+	ENSMUSG00000111491.2	TEC	KI.vs.WT	yes
Gm17922	2.23407e+16	0.033915511298308075	0.0026430700516551493	0.8118942204514706	chr14	93439536	93440337	802	-	ENSMUSG00000115632.2	processed_pseudogene	KI.vs.WT	yes
Prkcz	0.8596676134329196	0.033915511298308075	0.002643251649463071	3400828193731510	chr4	155344586	155445818	101233	-	ENSMUSG00000029053.17	protein_coding	KI.vs.WT	yes
Zfp462	1.007e+16	0.033915511298308075	0.002643660596742077	4575937027911590	chr4	54945048	55083563	138516	+	ENSMUSG00000060206.12	protein_coding	KI.vs.WT	yes
Ptms	-0.2839132989972016	0.033915511298308075	0.0026444213125530565	8301805527884950	chr6	124890644	124897066	6423	-	ENSMUSG00000030122.13	protein_coding	KI.vs.WT	no
Tmeff2	1.32388e+16	0.03416914655355371	0.0026661127804118137	3.35761e+16	chr1	50939806	51226429	286624	+	ENSMUSG00000026109.15	protein_coding	KI.vs.WT	yes
ENSMUSG00000120263	-1.79257e+16	0.03417594321494523	0.0026685587947544117	-0.29375548736166635	chr17	84496038	84496533	496	+	ENSMUSG00000120263.1	lncRNA	KI.vs.WT	yes
Dnai1	1.50401e+16	0.03418803096859047	0.0026729926981494028	0.8844246604866731	chr4	41569775	41638158	68384	+	ENSMUSG00000061322.16	protein_coding	KI.vs.WT	yes
Slc25a47	1.41922e+16	0.03418803096859047	0.0026739416757164524	1128672141370830	chr12	108801972	108822741	20770	+	ENSMUSG00000048856.10	protein_coding	KI.vs.WT	yes
Gm43097	-2.09337e+16	0.03418803096859047	0.0026752517506811826	1.0424e+16	chr3	108789139	108789289	151	+	ENSMUSG00000105175.2	processed_pseudogene	KI.vs.WT	yes
Pfkfb3	-0.6151678022946448	0.034211438519140325	0.0026790010992846993	7692851679799530	chr2	11476244	11558888	82645	-	ENSMUSG00000026773.20	protein_coding	KI.vs.WT	yes
H4c16	-0.823116587190426	0.03440994096526298	0.002696474073398971	3.38827e+16	chr6	136778551	136781413	2863	-	ENSMUSG00000096010.3	protein_coding	KI.vs.WT	yes
Dusp2	-1816641508409570	0.03442965246667193	0.002700148276324238	4500503852396730	chr2	127178079	127180296	2218	+	ENSMUSG00000027368.7	protein_coding	KI.vs.WT	yes
5830462O15Rik	1.49607e+16	0.03442965246667193	0.002702855474587546	0.7307688635165878	chr9	44090344	44091998	1655	-	ENSMUSG00000110972.2	TEC	KI.vs.WT	yes
I730030J21Rik	-1.64097e+16	0.03442965246667193	0.0027041701781293165	0.047969984958847064	chr15	100628349	100630630	2282	-	ENSMUSG00000116504.3	lncRNA	KI.vs.WT	yes
Gm22973	-2088422745675210	0.03442965246667193	0.0027074010349835884	-0.212246073917689	chr12	59087121	59087311	191	+	ENSMUSG00000065232.3	snRNA	KI.vs.WT	yes
Calr	-0.3260782612518312	0.03442965246667193	0.0027076682965661834	1.00486e+16	chr8	85568479	85573563	5085	-	ENSMUSG00000003814.9	protein_coding	KI.vs.WT	no
A530013C23Rik	-1.0764e+16	0.034460695556334076	0.0027120412870567847	1.05124e+16	chr2	167532597	167571092	38496	+	ENSMUSG00000006462.8	lncRNA	KI.vs.WT	yes
Gm16574	1.89207e+16	0.0344681733363655	0.002716505923945466	-0.13727365889860585	chr17	13037680	13038424	745	+	ENSMUSG00000089769.2	processed_pseudogene	KI.vs.WT	yes
Cntnap5b	1.72509e+16	0.0344681733363655	0.0027169329760604695	0.9649444015743256	chr1	99700490	100413667	713178	+	ENSMUSG00000067028.12	protein_coding	KI.vs.WT	yes
Kbtbd2	-0.3993810461541321	0.0344681733363655	0.0027189108690770522	6486311688987750	chr6	56754509	56774798	20290	-	ENSMUSG00000059486.12	protein_coding	KI.vs.WT	no
ENSMUSG00000120025	-1.1168e+16	0.0344681733363655	0.002721810638734272	1264694229304580	chr8	127320858	127321308	451	-	ENSMUSG00000120025.1	lncRNA	KI.vs.WT	yes
Slc2a3	0.5724371054690834	0.0344681733363655	0.0027241389121324816	3733307199165050	chr6	122704768	122778599	73832	-	ENSMUSG00000003153.11	protein_coding	KI.vs.WT	yes
Wsb1	-0.6769352586271112	0.0344681733363655	0.0027242222199705918	7544164685247590	chr11	79130198	79145497	15300	-	ENSMUSG00000017677.12	protein_coding	KI.vs.WT	yes
Nos1ap	0.5010814850040606	0.0345688240928082	0.0027347793254762108	4937001295412430	chr1	170130237	170417430	287194	-	ENSMUSG00000038473.15	protein_coding	KI.vs.WT	yes
Gm43018	1.87199e+16	0.0345688240928082	0.0027371858077065306	1.76994e+16	chr5	132468094	132469368	1275	-	ENSMUSG00000106450.2	TEC	KI.vs.WT	yes
Gprin1	0.7809558450428662	0.0345688240928082	0.0027392154816856134	4392517655071010	chr13	54884484	54897687	13204	-	ENSMUSG00000069227.5	protein_coding	KI.vs.WT	yes
Maml1	-0.36943810834657026	0.0345688240928082	0.0027399280979389456	5260827982032820	chr11	50146461	50183138	36678	-	ENSMUSG00000050567.17	protein_coding	KI.vs.WT	no
Septin4	0.9291874350495369	0.03475824333826301	0.0027578032765821874	382140759210828	chr11	87457479	87481365	23887	+	ENSMUSG00000020486.20	protein_coding	KI.vs.WT	yes
Aig1	0.4803923673763147	0.03475824333826301	0.002760341584870458	4297340661417020	chr10	13522798	13744724	221927	-	ENSMUSG00000019806.14	protein_coding	KI.vs.WT	no
Kcnd3os	2.18786e+16	0.03475824333826301	0.0027607864803990295	0.9950312894693671	chr3	105348911	105360271	11361	-	ENSMUSG00000074346.7	lncRNA	KI.vs.WT	yes
Lrch2	1.11543e+16	0.03479506402809474	0.002765661479363136	3.00184e+16	chrX	146253371	146337077	83707	-	ENSMUSG00000031290.15	protein_coding	KI.vs.WT	yes
Usp29	1188507949864900	0.034814318112575335	0.002769143352115717	2840187188969930	chr7	6733577	6970218	236642	+	ENSMUSG00000051527.12	protein_coding	KI.vs.WT	yes
Soga3	0.9537453681801004	0.034819578351917894	0.0027715135235270973	5152478080965180	chr10	29019835	29075626	55792	+	ENSMUSG00000038916.8	protein_coding	KI.vs.WT	yes
Gm38259	3.05235e+16	0.03483522760684902	0.0027764095945953518	-0.6333589935399554	chr1	8598004	8601537	3534	-	ENSMUSG00000102253.2	TEC	KI.vs.WT	yes
Gm43869	2.80611e+16	0.03483522760684902	0.0027766644426535482	-0.057476105056641254	chr6	45278037	45279441	1405	+	ENSMUSG00000108008.2	TEC	KI.vs.WT	yes
Asphd2	1.10889e+16	0.03488239479870822	0.0027823793609059308	2057627883358290	chr5	112532220	112542732	10513	-	ENSMUSG00000029348.12	protein_coding	KI.vs.WT	yes
Gm15842	1.66785e+16	0.0349956132390737	0.0027933718190830126	0.17886441690525112	chr5	122440485	122441102	618	+	ENSMUSG00000083909.2	processed_pseudogene	KI.vs.WT	yes
Miat	1229992253391390	0.03507987808745289	0.0028020642530616796	3.38721e+16	chr5	112361094	112377261	16168	-	ENSMUSG00000097767.10	lncRNA	KI.vs.WT	yes
P2rx6	-2186336708313410	0.035209275027354846	0.0028143736653031396	0.067826212266303	chr16	17379749	17395664	15916	+	ENSMUSG00000022758.15	protein_coding	KI.vs.WT	yes
ENSMUSG00000121178	-1.42868e+16	0.035216959815580366	0.002816961976279887	1128106987199310	chr8	70963129	70963961	833	+	ENSMUSG00000121178.1	lncRNA	KI.vs.WT	yes
Syt4	0.8940615449722369	0.03522844891540322	0.002819980091977281	2089573892292630	chr18	31570861	31580459	9599	-	ENSMUSG00000024261.7	protein_coding	KI.vs.WT	yes
Gm15834	1.89045e+16	0.03522844891540322	0.0028218303531452466	-0.4727793357218291	chr1	58544307	58562389	18083	+	ENSMUSG00000085054.3	lncRNA	KI.vs.WT	yes
Nxf7	2491280036848260	0.035233467379747946	0.002824207306784729	0.06317798115521074	chrX	134480304	134499526	19223	-	ENSMUSG00000031410.15	protein_coding	KI.vs.WT	yes
Gm43006	1.8131e+16	0.035291663511629226	0.002830850363516896	-0.4182633259287196	chr3	126451371	126452972	1602	+	ENSMUSG00000105774.2	TEC	KI.vs.WT	yes
Chic2	-0.39654651776696254	0.03538131619781198	0.0028400249324701094	5262856971889940	chr5	75158649	75205435	46787	-	ENSMUSG00000029229.9	protein_coding	KI.vs.WT	no
C2cd3	-0.24735263169707705	0.035435198820655746	0.0028471967416779354	6226380107269790	chr7	100021440	100119359	97920	+	ENSMUSG00000047248.21	protein_coding	KI.vs.WT	no
F3	-0.9752095936100034	0.035435198820655746	0.00284879584446941	2.44971e+16	chr3	121517186	121528697	11512	+	ENSMUSG00000028128.14	protein_coding	KI.vs.WT	yes
Frmd3	1.79606e+16	0.035435198820655746	0.002850308873746693	2.40514e+16	chr4	73931679	74120451	188773	+	ENSMUSG00000049122.18	protein_coding	KI.vs.WT	yes
4931431C16Rik	-1.47523e+16	0.03543865724669916	0.0028525735317410307	1.33655e+16	chr5	35738571	35746107	7537	-	ENSMUSG00000055061.6	lncRNA	KI.vs.WT	yes
Gm42639	2420727628679490	0.035558170310946026	0.0028654211153660825	0.20104660098344013	chr5	58102384	58104254	1871	+	ENSMUSG00000104871.2	TEC	KI.vs.WT	yes
Tiam2	1.16379e+16	0.035558170310946026	0.002866179871476479	4593202701960640	chr17	3376848	3581619	204772	+	ENSMUSG00000023800.16	protein_coding	KI.vs.WT	yes
Gm38380	1.85914e+16	0.035564960919206134	0.0028687207826646652	0.9362953624763414	chr1	13424707	13426954	2248	-	ENSMUSG00000102664.2	TEC	KI.vs.WT	yes
Kcnd2	1.03886e+16	0.03560002220880845	0.0028735443935361082	449847608309998	chr6	21215502	21729804	514303	+	ENSMUSG00000060882.6	protein_coding	KI.vs.WT	yes
Prelid3a	1.20288e+16	0.03566081815674831	0.00288137859857314	2156445293725350	chr18	67597936	67612905	14970	+	ENSMUSG00000024530.9	protein_coding	KI.vs.WT	yes
Gm37608	1.75748e+16	0.03566081815674831	0.0028824495393515175	2.59285e+16	chr7	79166630	79168509	1880	+	ENSMUSG00000103831.2	TEC	KI.vs.WT	yes
5430405H02Rik	0.6363752206758154	0.035963130525593426	0.002909992625659025	2321278303704790	chr2	156685045	156704926	19882	-	ENSMUSG00000085741.10	lncRNA	KI.vs.WT	yes
Sntg2	1.52232e+16	0.035963130525593426	0.0029122524625279757	1.98974e+16	chr12	30224481	30423374	198894	-	ENSMUSG00000020672.15	protein_coding	KI.vs.WT	yes
Gm44861	-0.46453941689924294	0.035963130525593426	0.0029129329377512608	4401971972153110	chr7	89691905	89693124	1220	+	ENSMUSG00000108897.2	TEC	KI.vs.WT	no
Gm44802	2454866890757420	0.03596697904673996	0.0029152607456045952	1.41259e+16	chr8	9759171	9761086	1916	-	ENSMUSG00000108918.2	TEC	KI.vs.WT	yes
Zfp748	0.5478734200348023	0.036009399757487306	0.0029207175700159266	4421686336335880	chr13	67686760	67701949	15190	-	ENSMUSG00000095432.10	protein_coding	KI.vs.WT	yes
Fgf9	1.37765e+16	0.03605247947919202	0.002926232639342491	0.7572675185633496	chr14	58308004	58350177	42174	+	ENSMUSG00000021974.16	protein_coding	KI.vs.WT	yes
Zfp60	0.4383408122632532	0.03613491777654611	0.002934949319406688	4006682111136610	chr7	27430814	27453127	22314	+	ENSMUSG00000037640.16	protein_coding	KI.vs.WT	no
Vps37b	-0.4344093280771761	0.03615211562956364	0.0029383726268423366	5503964356658680	chr5	124142704	124170333	27630	-	ENSMUSG00000066278.7	protein_coding	KI.vs.WT	no
E130317F20Rik	-1.01939e+16	0.036394784361919084	0.002960136328987926	2.5611e+16	chr10	79687215	79690805	3591	-	ENSMUSG00000091994.3	lncRNA	KI.vs.WT	yes
Gm32842	2104751218576470	0.036477251582540025	0.0029688884135565087	0.23282315830419853	chr8	48723283	48724020	738	-	ENSMUSG00000110480.2	processed_pseudogene	KI.vs.WT	yes
Mpp2	0.8028315746809216	0.03652449445053779	0.002974780854071267	4004609519248710	chr11	101947841	101979341	31501	-	ENSMUSG00000017314.13	protein_coding	KI.vs.WT	yes
Rims2	0.9595509131998532	0.036541612678606845	0.0029782233651734504	5317833203734990	chr15	39061656	39547768	486113	+	ENSMUSG00000037386.17	protein_coding	KI.vs.WT	yes
Snora23	0.9130400296378247	0.03654173813275357	0.002980281893674688	2433122944660690	chr7	109645571	109645754	184	+	ENSMUSG00000064451.3	snoRNA	KI.vs.WT	yes
Camk2a	0.5436590317213116	0.03656060849704028	0.0029838702898929734	6922602287365120	chr18	61058690	61121224	62535	+	ENSMUSG00000024617.17	protein_coding	KI.vs.WT	yes
Tmem117	1.50698e+16	0.03665362558820402	0.002993516394731685	0.5914532333680559	chr15	94527113	94993979	466867	+	ENSMUSG00000063296.6	protein_coding	KI.vs.WT	yes
Zfp821	0.6301991877983262	0.03669819186324613	0.0030086757941277333	3.37631e+16	chr8	110432178	110451564	19387	+	ENSMUSG00000031728.11	protein_coding	KI.vs.WT	yes
Gm37238	-0.9295107711218383	0.03669819186324613	0.0030092913610677324	2.23862e+16	chr13	48696120	48698509	2390	-	ENSMUSG00000103373.2	TEC	KI.vs.WT	yes
N4bp2l1	-0.4230788326939713	0.03669819186324613	0.003009489760808076	5382450127420910	chr5	150495109	150520653	25545	-	ENSMUSG00000041132.12	protein_coding	KI.vs.WT	no
Oser1	-0.5214214140529476	0.03669819186324613	0.0030098328150312765	3.28714e+16	chr2	163247742	163266617	18876	-	ENSMUSG00000035399.13	protein_coding	KI.vs.WT	yes
Lbx1	-2.00649e+16	0.03669819186324613	0.0030117873077882117	-0.029612555322774542	chr19	45221123	45224251	3129	-	ENSMUSG00000025216.10	protein_coding	KI.vs.WT	yes
Celf6	1.51785e+16	0.03669819186324613	0.003012057909284665	1.49921e+16	chr9	59485200	59514575	29376	+	ENSMUSG00000032297.12	protein_coding	KI.vs.WT	yes
Runx2os1	1.54774e+16	0.03669819186324613	0.003012956971390075	-0.15819084481453166	chr17	45046732	45048499	1768	+	ENSMUSG00000073394.5	lncRNA	KI.vs.WT	yes
Gm41611	-1197396663754950	0.03669819186324613	0.0030136127286802456	2.81272e+16	chr17	71274881	71278800	3920	+	ENSMUSG00000117079.2	lncRNA	KI.vs.WT	yes
Atosb	-0.41762447414208576	0.03671830583242712	0.0030173226653776994	4081723780488130	chr4	43032414	43046220	13807	-	ENSMUSG00000036002.13	protein_coding	KI.vs.WT	no
Gm49685	2.28672e+16	0.0367624211395447	0.003024136223301093	-0.34159610394516154	chr15	20449205	20980026	530822	+	ENSMUSG00000115122.2	lncRNA	KI.vs.WT	yes
Gm42466	1251708829923340	0.0367624211395447	0.0030250691834558083	1.37646e+16	chr5	68000463	68001763	1301	-	ENSMUSG00000107136.2	TEC	KI.vs.WT	yes
ENSMUSG00000121130	-1.62336e+16	0.0368318768859669	0.003032849055240211	1.41791e+16	chr4	115910732	115912250	1519	+	ENSMUSG00000121130.1	lncRNA	KI.vs.WT	yes
Zscan29	-0.29277542545201796	0.03685783965311201	0.0030370529310579965	5325864011270250	chr2	120988754	121001606	12853	-	ENSMUSG00000050619.15	protein_coding	KI.vs.WT	no
Itgb2	-0.2763112137341472	0.03693798830280065	0.0030471889115924245	8659705819954260	chr10	77366086	77401542	35457	+	ENSMUSG00000000290.14	protein_coding	KI.vs.WT	no
Arpp21	1.21576e+16	0.03693798830280065	0.0030477981379889323	6976003808248570	chr9	111894159	112065006	170848	-	ENSMUSG00000032503.19	protein_coding	KI.vs.WT	yes
Osgin1	-0.9529781057121188	0.03697019066926589	0.0030525275143401718	2592472765927840	chr8	120160863	120172995	12133	+	ENSMUSG00000074063.11	protein_coding	KI.vs.WT	yes
Gm47920	-0.9287016571890131	0.036986903974438365	0.0030559807431794926	2910707628759070	chr14	25460404	25462811	2408	+	ENSMUSG00000114709.2	lncRNA	KI.vs.WT	yes
Slc11a1	-0.27923358181754165	0.0370692994302522	0.0030650764839570323	6725651706550010	chr1	74414354	74425221	10868	+	ENSMUSG00000026177.12	protein_coding	KI.vs.WT	no
Klhl42	0.573803693147834	0.0370692994302522	0.003066944280215933	3.58727e+16	chr6	146992877	147014276	21400	+	ENSMUSG00000040102.11	protein_coding	KI.vs.WT	yes
Penk	1.18105e+16	0.03715350928947235	0.0030759940146048576	350098531867218	chr4	4133531	4138819	5289	-	ENSMUSG00000045573.10	protein_coding	KI.vs.WT	yes
Ift122	0.5920330979385773	0.03716182405335063	0.0030787654680970986	3.98475e+16	chr6	115830431	115903660	73230	+	ENSMUSG00000030323.14	protein_coding	KI.vs.WT	yes
Gm42737	1.32439e+16	0.03723937604497832	0.0030878893332715054	1.04929e+16	chr5	67914919	67916673	1755	-	ENSMUSG00000106859.2	TEC	KI.vs.WT	yes
Gm16575	-1.50007e+16	0.03723937604497832	0.0030893652772739856	0.29065908894597653	chr15	79623775	79625999	2225	+	ENSMUSG00000089796.2	lncRNA	KI.vs.WT	yes
Mbp	0.6985661179484093	0.03737052964022356	0.0031023404931149715	6827340502995490	chr18	82493271	82603762	110492	+	ENSMUSG00000041607.18	protein_coding	KI.vs.WT	yes
Rab36	1.46045e+16	0.03745041097753303	0.0031110711361381138	2003849527876840	chr10	74872890	74890580	17691	+	ENSMUSG00000020175.16	protein_coding	KI.vs.WT	yes
Gm47026	2.44525e+16	0.03745783057392651	0.0031137871491666485	-0.3389557868575007	chr10	119489969	119492300	2332	+	ENSMUSG00000112106.2	TEC	KI.vs.WT	yes
Coq10a	-0.7163424949103758	0.03754409730783734	0.003123062802961357	3.036e+16	chr10	128198969	128204866	5898	-	ENSMUSG00000039914.7	protein_coding	KI.vs.WT	yes
Ppfia4	0.28793778052550095	0.03759133358147593	0.0031307220291330604	8183932996158440	chr1	134224521	134260666	36146	-	ENSMUSG00000026458.14	protein_coding	KI.vs.WT	no
Dclk2	1.19295e+16	0.03759133358147593	0.003131206373434598	5578029267675610	chr3	86693458	86828159	134702	-	ENSMUSG00000028078.15	protein_coding	KI.vs.WT	yes
Lrrc70	-1.60318e+16	0.03759204057535604	0.003134261894355582	1.96285e+16	chr13	106970222	106983775	13554	-	ENSMUSG00000118423.2	transcribed_unitary_pseudogene	KI.vs.WT	yes
Glrb	0.6509673530823287	0.03759204057535604	0.0031354796174960647	2720076652450160	chr3	80750906	80820967	70062	-	ENSMUSG00000028020.17	protein_coding	KI.vs.WT	yes
Gm8850	1939164189739300	0.0376140512404834	0.0031403195111569288	0.6775376000897854	chr1	155055547	155056134	588	+	ENSMUSG00000104181.2	processed_pseudogene	KI.vs.WT	yes
Lrif1	-0.4740228422357064	0.0376140512404834	0.0031415323065201945	4560106448095750	chr3	106592303	106643893	51591	+	ENSMUSG00000056260.16	protein_coding	KI.vs.WT	no
Fez1	0.7184119207673336	0.03775396005731864	0.003155333769364467	4424255333727710	chr9	36733160	36790220	57061	+	ENSMUSG00000032118.17	protein_coding	KI.vs.WT	yes
Ptk2	0.9380286158432191	0.03777743802954539	0.003159413539242249	5081118430863060	chr15	73076951	73295129	218179	-	ENSMUSG00000022607.19	protein_coding	KI.vs.WT	yes
ENSMUSG00000120505	-2143632724583040	0.03803147730450481	0.003182791234059736	0.20697418570621184	chr11	116324408	116324671	264	-	ENSMUSG00000120505.1	lncRNA	KI.vs.WT	yes
Sacs	0.5535925164382118	0.038031666297818144	0.0031849388704562956	3999906052757670	chr14	61375906	61478144	102239	+	ENSMUSG00000048279.20	protein_coding	KI.vs.WT	yes
Kcnq5	1.10801e+16	0.038222001875961024	0.0032034001633927255	2.86149e+16	chr1	21468627	22032166	563540	-	ENSMUSG00000028033.17	protein_coding	KI.vs.WT	yes
Lrp5	-0.35988832805535736	0.038222001875961024	0.003205163386011081	7330176510695360	chr19	3634828	3736564	101737	-	ENSMUSG00000024913.17	protein_coding	KI.vs.WT	no
Gm36952	2.32554e+16	0.038258396676303236	0.0032103598556292566	1.03734e+16	chr1	25836362	25839986	3625	-	ENSMUSG00000104132.2	TEC	KI.vs.WT	yes
Ptpre	-0.276724793786956	0.03828915248463083	0.00321508690706149	6853469643910270	chr7	135139210	135288022	148813	+	ENSMUSG00000041836.11	protein_coding	KI.vs.WT	no
9930024M15Rik	1.68741e+16	0.03830236674481973	0.003221291881597795	0.9420090520966061	chr10	41702534	41705117	2584	+	ENSMUSG00000111131.2	TEC	KI.vs.WT	yes
Ppfia2	1.19365e+16	0.03830236674481973	0.0032236949099113343	5.96702e+16	chr10	106306200	106771813	465614	+	ENSMUSG00000053825.16	protein_coding	KI.vs.WT	yes
Bach2os	-0.7466330008396247	0.03830236674481973	0.003224699533813406	2.85556e+16	chr4	32559680	32571708	12029	-	ENSMUSG00000086150.2	lncRNA	KI.vs.WT	yes
Nudt12	-1.13149e+16	0.03830236674481973	0.0032249515023007017	1.45267e+16	chr17	59306613	59320367	13755	-	ENSMUSG00000024228.13	protein_coding	KI.vs.WT	yes
Grin2a	1.10168e+16	0.03830236674481973	0.003227543430059721	5436545397749120	chr16	9385762	9813424	427663	-	ENSMUSG00000059003.13	protein_coding	KI.vs.WT	yes
Gm14634	-1.55992e+16	0.03830236674481973	0.0032290784520296457	0.9651067071527455	chrX	12628517	12687731	59215	+	ENSMUSG00000085891.8	lncRNA	KI.vs.WT	yes
Rgs7bp	0.38344443293377417	0.03839379679821692	0.0032389385751859004	5433978462303500	chr13	105082412	105191438	109027	-	ENSMUSG00000021719.10	protein_coding	KI.vs.WT	no
Gm38020	1.5698e+16	0.038504497200363856	0.003250435694156276	1.53316e+16	chrX	102620032	102624707	4676	-	ENSMUSG00000103697.2	TEC	KI.vs.WT	yes
Ndst2	-0.29756538476088107	0.038524857916782104	0.003254313950705753	5045300779155640	chr14	20773798	20784630	10833	-	ENSMUSG00000039308.7	protein_coding	KI.vs.WT	no
Brd1	-0.25437420819269785	0.03860733581013028	0.003264782252096672	6.97162e+16	chr15	88571237	88618436	47200	-	ENSMUSG00000022387.18	protein_coding	KI.vs.WT	no
Heatr1	-0.24910600725847115	0.03860733581013028	0.0032656092902178585	6328223106160010	chr13	12409908	12455170	45263	+	ENSMUSG00000050244.10	protein_coding	KI.vs.WT	no
Hspa1b	3.88772e+16	0.03868426774664569	0.003275929974983254	9741505216507250	chr17	35175412	35178214	2803	-	ENSMUSG00000090877.4	protein_coding	KI.vs.WT	yes
Dcc	1196029028893900	0.03868426774664569	0.003276453394909285	2828944482660770	chr18	71386705	72484140	1097436	-	ENSMUSG00000060534.17	protein_coding	KI.vs.WT	yes
Gabrg3	1.47783e+16	0.038819522629134295	0.0032900851017517406	1082683228050390	chr7	56366213	57036936	670724	-	ENSMUSG00000055026.14	protein_coding	KI.vs.WT	yes
Gm14443	1.97642e+16	0.03891455959511675	0.0033003211136441502	0.504319801656265	chr2	175008048	175017664	9617	-	ENSMUSG00000078902.4	protein_coding	KI.vs.WT	yes
Gprc5b	0.8317750525671491	0.038975108996088255	0.0033076409764617497	5522871638677700	chr7	118571270	118594434	23165	-	ENSMUSG00000008734.10	protein_coding	KI.vs.WT	yes
Yju2	-0.4643523158791675	0.039010874642479106	0.0033128629531029062	397633966833175	chr17	56266099	56275285	9187	+	ENSMUSG00000003208.10	protein_coding	KI.vs.WT	no
Adam33	0.9432073000500429	0.03908876432384958	0.0033225117880053873	2.57778e+16	chr2	130892511	130905734	13224	-	ENSMUSG00000027318.18	protein_coding	KI.vs.WT	yes
Map2k3	-0.5191186526387688	0.03908876432384958	0.0033238596120672543	4442096641418010	chr11	60822859	60843637	20779	+	ENSMUSG00000018932.10	protein_coding	KI.vs.WT	yes
Atcayos	2.45777e+16	0.03921813547356502	0.0033370588368201626	-0.6661632874668049	chr10	81030443	81046711	16269	+	ENSMUSG00000085779.2	lncRNA	KI.vs.WT	yes
9530059O14Rik	1.96464e+16	0.03928910793811569	0.0033453001658070476	3737021879827960	chr9	122401564	122508661	107098	+	ENSMUSG00000097736.9	lncRNA	KI.vs.WT	yes
Gm42991	209940987627772	0.039367354253946836	0.0033541691965246184	2618926729646630	chr5	132000889	132004725	3837	-	ENSMUSG00000106386.2	TEC	KI.vs.WT	yes
D730003I15Rik	-0.8251242917352737	0.03937568357297128	0.0033598885005733073	4164770594152740	chr1	190956601	190958337	1737	+	ENSMUSG00000073478.8	lncRNA	KI.vs.WT	yes
Adgrl3	0.8240538283845168	0.03937568357297128	0.003360493552533382	4860635231073380	chr5	81167985	81972980	804996	+	ENSMUSG00000037605.17	protein_coding	KI.vs.WT	yes
Pcdhb9	1.74926e+16	0.03937568357297128	0.0033615003408988377	0.4345935606420426	chr18	37533908	37536962	3055	+	ENSMUSG00000051242.2	protein_coding	KI.vs.WT	yes
Atp2b2	0.8704064158772638	0.039414033001352176	0.0033669835366625963	740761065363478	chr6	113720792	114019574	298783	-	ENSMUSG00000030302.18	protein_coding	KI.vs.WT	yes
Bloc1s6os	-2.50138e+16	0.039442368158705415	0.0033716149911449415	-0.5228724569326667	chr2	122574858	122580334	5477	-	ENSMUSG00000085633.3	lncRNA	KI.vs.WT	yes
1700017B05Rik	-0.43151581637327385	0.03949187229609885	0.0033780603768972448	8205276776295030	chr9	57160400	57169895	9496	-	ENSMUSG00000032300.8	protein_coding	KI.vs.WT	no
Rpl21-ps1	-1.91808e+16	0.039504319348186295	0.0033813394419663946	0.6937543447029947	chr1	184349445	184349924	480	+	ENSMUSG00000102606.2	processed_pseudogene	KI.vs.WT	yes
ENSMUSG00000120197	-2028596206217910	0.03953511865660414	0.003386191777314525	0.09153637522374806	chr1	154959421	154960136	716	+	ENSMUSG00000120197.1	lncRNA	KI.vs.WT	yes
Baz1a	-0.3692248775849748	0.03965910213223158	0.0034009603752095797	6652078655531660	chr12	54939774	55061133	121360	-	ENSMUSG00000035021.14	protein_coding	KI.vs.WT	no
Tnr	0.8450263505223434	0.03965910213223158	0.003401986840176977	4610499044553830	chr1	159351339	159759299	407961	+	ENSMUSG00000015829.14	protein_coding	KI.vs.WT	yes
Zfp955a	0.6835230615112189	0.03965910213223158	0.003403480121325479	3314258958826130	chr17	33458692	33474119	15428	-	ENSMUSG00000094441.3	protein_coding	KI.vs.WT	yes
AI480526	1.22753e+16	0.03995486282603649	0.0034323372097629684	3.60892e+16	chr5	123271786	123279729	7944	-	ENSMUSG00000090086.9	lncRNA	KI.vs.WT	yes
Miga1	0.345963015074965	0.03995486282603649	0.0034333410713180456	5.04152e+16	chr3	151979486	152046044	66559	-	ENSMUSG00000054942.14	protein_coding	KI.vs.WT	no
Gm34907	-2.35925e+16	0.04002046748275156	0.003442080799321332	-0.01540922870751468	chr14	103701355	103750055	48701	+	ENSMUSG00000115762.2	lncRNA	KI.vs.WT	yes
Chrna7	1545503198871890	0.04002046748275156	0.0034434651113241952	0.10298815257019026	chr7	62748440	62862317	113878	-	ENSMUSG00000030525.9	protein_coding	KI.vs.WT	yes
Stxbp6	0.7710866747060897	0.040098724499037106	0.003452446234894674	3.72035e+16	chr12	44899267	45121492	222226	-	ENSMUSG00000046314.17	protein_coding	KI.vs.WT	yes
Ranbp17	1568878752672810	0.040150771024648584	0.0034591779744890623	0.9345188649485252	chr11	33161795	33463746	301952	-	ENSMUSG00000040594.20	protein_coding	KI.vs.WT	yes
Hnrnph1	-0.5164338754971034	0.040208455148541704	0.0034664015705413195	7939866280032520	chr11	50267817	50277355	9539	+	ENSMUSG00000007850.17	protein_coding	KI.vs.WT	yes
Gm44067	1143775561876710	0.04024095722971354	0.003471459258774055	1.56855e+16	chr6	128820749	128823922	3174	-	ENSMUSG00000108095.2	lncRNA	KI.vs.WT	yes
Dpf1	1.00316e+16	0.040613116549581184	0.0035058407783831293	4005384919755430	chr7	29003376	29017668	14293	+	ENSMUSG00000030584.15	protein_coding	KI.vs.WT	yes
Gm44229	2.64223e+16	0.04077129210869975	0.003521780332931968	-0.29440666316370184	chr6	80422333	80424819	2487	+	ENSMUSG00000108088.2	TEC	KI.vs.WT	yes
Arf2	-0.3279971903268118	0.040785155304648685	0.0035252639842919434	5557800249786530	chr11	103857565	103876163	18599	+	ENSMUSG00000062421.14	protein_coding	KI.vs.WT	no
Iqch	-1.68512e+16	0.04079041885079824	0.003528011780774346	2421284901271300	chr9	63328737	63509775	181039	-	ENSMUSG00000037801.14	protein_coding	KI.vs.WT	yes
Ube2e2	1.12095e+16	0.04079041885079824	0.0035311419042259686	2933144120339900	chr14	3575429	3896121	320693	+	ENSMUSG00000058317.13	protein_coding	KI.vs.WT	yes
Notch1	-0.3832785014281832	0.04079041885079824	0.0035325783141526503	6848944195505250	chr2	26347915	26406675	58761	-	ENSMUSG00000026923.16	protein_coding	KI.vs.WT	no
Abcb8	0.5781557622638187	0.04084090287775089	0.0035392396776346906	3.21111e+16	chr5	24598661	24615052	16392	+	ENSMUSG00000028973.19	protein_coding	KI.vs.WT	yes
Gm10252	-1318259711422650	0.04095230153747276	0.0035511889281653786	1.06071e+16	chr7	45108893	45109724	832	+	ENSMUSG00000110350.2	TEC	KI.vs.WT	yes
Slc15a3	-0.6642385947777212	0.041077721760770444	0.0035643673366408434	6911389699390700	chr19	10817091	10836726	19636	+	ENSMUSG00000024737.3	protein_coding	KI.vs.WT	yes
Gm43339	1.72669e+16	0.04117251338456864	0.003574900405420226	0.6186493674573412	chr5	124416370	124417975	1606	-	ENSMUSG00000105382.2	TEC	KI.vs.WT	yes
1110002E22Rik	1.20884e+16	0.041296595120030775	0.0035879889257874275	1.44039e+16	chr3	137770813	137787267	16455	+	ENSMUSG00000090066.3	protein_coding	KI.vs.WT	yes
Gm37296	1.22427e+16	0.04132381443612237	0.0035926701900462887	0.8373574009400282	chr15	68210144	68213065	2922	-	ENSMUSG00000104116.2	TEC	KI.vs.WT	yes
Ndrg4	0.8152475673529211	0.041392307252807695	0.0036026920455366367	6739625772426960	chr8	96403608	96441747	38140	+	ENSMUSG00000036564.18	protein_coding	KI.vs.WT	yes
Gabra2	0.9980761988369367	0.041392307252807695	0.003604306453930857	2455829555277830	chr5	71114940	71253192	138253	-	ENSMUSG00000000560.10	protein_coding	KI.vs.WT	yes
Gucy1b1	0.6675433659622781	0.041392307252807695	0.0036055855084564546	3636002568723770	chr3	81939313	81981996	42684	-	ENSMUSG00000028005.14	protein_coding	KI.vs.WT	yes
Tank	-0.38383956610888864	0.04149402713772665	0.003616771984258124	531180232746541	chr2	61408929	61484515	75587	+	ENSMUSG00000064289.16	protein_coding	KI.vs.WT	no
Gm42598	1.98327e+16	0.04153049264148507	0.0036222783940667467	0.4157194411507642	chr5	7283401	7285837	2437	-	ENSMUSG00000105711.2	TEC	KI.vs.WT	yes
Gm43313	-1694309057645550	0.041567538380103304	0.0036278395323890607	0.8567708318580559	chr5	32624539	32626773	2235	+	ENSMUSG00000107083.2	TEC	KI.vs.WT	yes
Smarcd1	0.3260130184998308	0.04160062677982679	0.003633059222139582	556273617811677	chr15	99600010	99611872	11863	+	ENSMUSG00000023018.6	protein_coding	KI.vs.WT	no
Slc25a43	-1840557047542570	0.041662687656065095	0.003640814465011518	-0.5926558263601601	chrX	36007312	36040855	33544	+	ENSMUSG00000037636.7	protein_coding	KI.vs.WT	yes
Shc3	0.6208928180410823	0.04167192095388053	0.003645702378951507	3.88806e+16	chr13	51585077	51723523	138447	-	ENSMUSG00000021448.9	protein_coding	KI.vs.WT	yes
Amigo1	0.7552637192877293	0.04167192095388053	0.003646293083464546	4.60602e+16	chr3	108093651	108099602	5952	+	ENSMUSG00000050947.10	protein_coding	KI.vs.WT	yes
Gm43080	1.27732e+16	0.041697567346933744	0.003654884238341534	1.01234e+16	chr3	36023533	36026175	2643	-	ENSMUSG00000105556.2	TEC	KI.vs.WT	yes
Doc2a	1.60565e+16	0.041697567346933744	0.003655612142906804	0.10225132595721206	chr7	126446588	126451877	5290	+	ENSMUSG00000052301.15	protein_coding	KI.vs.WT	yes
Sf3b1	-0.28843258283663986	0.041697567346933744	0.003655791373364127	8545556307401710	chr1	55024328	55066640	42313	-	ENSMUSG00000025982.14	protein_coding	KI.vs.WT	no
Hmgcll1	1.80118e+16	0.041697567346933744	0.0036578863732035483	1091850292634050	chr9	75922137	76043632	121496	+	ENSMUSG00000007908.15	protein_coding	KI.vs.WT	yes
4933426B08Rik	-1.87752e+16	0.04211090613175933	0.003696506670534479	0.39568570280713067	chr17	7075908	7085928	10021	+	ENSMUSG00000116644.3	lncRNA	KI.vs.WT	yes
Renbp	-0.352222863523741	0.04215859123994361	0.00370305563189415	5663642946689660	chrX	72965727	72974456	8730	-	ENSMUSG00000031387.15	protein_coding	KI.vs.WT	no
Gm14963	-1.42535e+16	0.042308983380429925	0.003719135797192298	1.13074e+16	chr19	6318825	6326635	7811	-	ENSMUSG00000085196.2	lncRNA	KI.vs.WT	yes
LTO1	0.6272371949520301	0.042308983380429925	0.003721008684074807	3.65701e+16	chr7	144468837	144485438	16602	+	ENSMUSG00000031072.15	protein_coding	KI.vs.WT	yes
Phactr4	-0.34877736710967744	0.042310565656750156	0.003723519511272295	5125974317710180	chr4	132083234	132149800	66567	-	ENSMUSG00000066043.14	protein_coding	KI.vs.WT	no
H2-Q6	-1.94677e+16	0.042444024400295904	0.003737643628523815	1.99295e+16	chr17	35643826	35649031	5206	+	ENSMUSG00000073409.13	protein_coding	KI.vs.WT	yes
Pdp1	0.6291848938446408	0.04246597888992443	0.0037419573326771976	2.72386e+16	chr4	11958184	11966452	8269	-	ENSMUSG00000049225.15	protein_coding	KI.vs.WT	yes
Klf6	-1.1337e+16	0.0424725718025238	0.0037483749317479003	8137251489287750	chr13	5911481	5920393	8913	+	ENSMUSG00000000078.8	protein_coding	KI.vs.WT	yes
Selenok	-0.4153871508927054	0.0424725718025238	0.0037490391263546707	6762447876885520	chr14	29690265	29697619	7355	+	ENSMUSG00000042682.11	protein_coding	KI.vs.WT	no
Vmn2r1	2022062775914050	0.0424725718025238	0.0037496805262878354	-0.7478144374086567	chr3	63988968	64016905	27938	+	ENSMUSG00000027824.6	protein_coding	KI.vs.WT	yes
Foxj2	-0.3300687799840106	0.042506149503024254	0.0037550275569936224	6.07195e+16	chr6	122796873	122822325	25453	+	ENSMUSG00000003154.16	protein_coding	KI.vs.WT	no
Shtn1	0.6965177984048836	0.042536811316446044	0.003761421332553877	417497032927265	chr19	58961788	59064532	102745	-	ENSMUSG00000041362.18	protein_coding	KI.vs.WT	yes
Gm37443	2596612820538400	0.042536811316446044	0.0037625049471609784	-0.6455672164211167	chr3	33088377	33091203	2827	-	ENSMUSG00000102581.2	TEC	KI.vs.WT	yes
Gm45091	-1.5232e+16	0.04259951254152599	0.003770438918333494	0.676130201915233	chr7	34817469	34819030	1562	-	ENSMUSG00000108624.2	lncRNA	KI.vs.WT	yes
Scn8a	1.04605e+16	0.04269177807336098	0.0037809982822819698	5233817772195370	chr15	100767739	100943819	176081	+	ENSMUSG00000023033.15	protein_coding	KI.vs.WT	yes
2900078I11Rik	2065460713673410	0.04292773746509601	0.0038043022944123763	-0.07374745582759143	chr10	39533424	39534422	999	-	ENSMUSG00000111358.2	TEC	KI.vs.WT	yes
Gm37298	1.55715e+16	0.04305422704117361	0.0038179252903103498	1.37637e+16	chr1	137837029	137840896	3868	+	ENSMUSG00000104118.2	TEC	KI.vs.WT	yes
Ccsap	1045127272971650	0.04310829611367461	0.0038251363647952303	5.05313e+16	chr8	124567570	124586948	19379	-	ENSMUSG00000031971.16	protein_coding	KI.vs.WT	yes
Gm8855	1.6715e+16	0.043162403409863354	0.0038323568946874186	1.74276e+16	chrX	86716598	86717475	878	-	ENSMUSG00000084029.2	processed_pseudogene	KI.vs.WT	yes
A330023F24Rik	1.27836e+16	0.04333525853349502	0.0038501336757617495	4862378409695040	chr1	194658654	194720212	61559	+	ENSMUSG00000096929.9	lncRNA	KI.vs.WT	yes
Mon2	-0.2607883354686044	0.04338915026253795	0.0038584057673048283	7.42684e+16	chr10	122827965	122912410	84446	-	ENSMUSG00000034602.16	protein_coding	KI.vs.WT	no
ENSMUSG00000120067	-1.15726e+16	0.04338915026253795	0.0038597859566506577	2.51677e+16	chr19	9959115	9959934	820	-	ENSMUSG00000120067.1	lncRNA	KI.vs.WT	yes
ENSMUSG00000120538	-1.4279e+16	0.04352685135436117	0.003874475333560849	0.4016443063089464	chr1	86430749	86432118	1370	-	ENSMUSG00000120538.1	lncRNA	KI.vs.WT	yes
Uggt2	0.81400909012788	0.04356757973879449	0.003880542836600025	3.66534e+16	chr14	119222451	119336842	114392	-	ENSMUSG00000042104.19	protein_coding	KI.vs.WT	yes
D830050J10Rik	-1.06125e+16	0.04359702492881975	0.003888923104546527	1.43377e+16	chr6	115652929	115654741	1813	+	ENSMUSG00000107994.2	lncRNA	KI.vs.WT	yes
1110018N20Rik	1823956237174310	0.04359702492881975	0.0038930431684249993	0.6940756426947788	chr2	167030622	167034728	4107	+	ENSMUSG00000085151.8	lncRNA	KI.vs.WT	yes
Gnai1	0.6275285874551505	0.04359702492881975	0.0038958129136467757	405719787201133	chr5	18470133	18565353	95221	-	ENSMUSG00000057614.7	protein_coding	KI.vs.WT	yes
Gm18760	1.74342e+16	0.04359702492881975	0.0038964949332546215	0.4631377331797012	chr14	29749644	29750308	665	-	ENSMUSG00000114705.2	processed_pseudogene	KI.vs.WT	yes
Slc12a8	1.69226e+16	0.04359702492881975	0.003897881503260995	0.08322381323880196	chr16	33337698	33484505	146808	+	ENSMUSG00000035506.17	protein_coding	KI.vs.WT	yes
Csf3r	-0.5035854063634383	0.04359702492881975	0.0038989420752577114	7.89654e+16	chr4	125918343	125938233	19891	+	ENSMUSG00000028859.15	protein_coding	KI.vs.WT	yes
Srgap3	0.9125699300264571	0.04359702492881975	0.00390027196112087	6367751866173050	chr6	112694932	112924227	229296	-	ENSMUSG00000030257.17	protein_coding	KI.vs.WT	yes
Dlgap1	0.853708241910353	0.04371632973286703	0.003913395660503848	6770618750070890	chr17	70276068	71128408	852341	+	ENSMUSG00000003279.18	protein_coding	KI.vs.WT	yes
ENSMUSG00000119977	-1.68204e+16	0.0437563449328149	0.003919430448578375	1.0193e+16	chr18	36691796	36693321	1526	-	ENSMUSG00000119977.1	lncRNA	KI.vs.WT	yes
Gm38057	1.35797e+16	0.04381201898046087	0.003926873225883237	0.9791709454454425	chr9	71759283	71762485	3203	-	ENSMUSG00000102143.2	TEC	KI.vs.WT	yes
Etv6	-0.38248817592732465	0.04390596240592624	0.0039400220846762075	6483781264590070	chr6	134012663	134247121	234459	+	ENSMUSG00000030199.17	protein_coding	KI.vs.WT	no
Gm44800	1883440656408490	0.04390596240592624	0.0039402155724152415	243392272549055	chr8	9648799	9650653	1855	-	ENSMUSG00000109418.2	TEC	KI.vs.WT	yes
Cadm2	0.6940827637454161	0.04391807961644114	0.00394376477273199	5100060033868500	chr16	66452307	67417796	965490	-	ENSMUSG00000064115.14	protein_coding	KI.vs.WT	yes
Gm43111	2170606866050370	0.043921444790075335	0.003950253421373294	0.7862821330184717	chr5	4918348	4920266	1919	-	ENSMUSG00000106472.2	lncRNA	KI.vs.WT	yes
Gm42989	1.96786e+16	0.043921444790075335	0.003952993831743968	2.08378e+16	chr5	132399215	132401520	2306	-	ENSMUSG00000104994.2	TEC	KI.vs.WT	yes
Slit3	1223703185095830	0.043921444790075335	0.003953138060276103	3.58387e+16	chr11	35012051	35599334	587284	+	ENSMUSG00000056427.11	protein_coding	KI.vs.WT	yes
Pigo	0.6380964023980854	0.043921444790075335	0.003953914816864405	3.12267e+16	chr4	43017635	43025819	8185	-	ENSMUSG00000028454.17	protein_coding	KI.vs.WT	yes
Gm28320	2.16103e+16	0.04409007460761803	0.003971566698118956	0.37801147820459025	chr1	51187468	51189740	2273	+	ENSMUSG00000099924.2	lncRNA	KI.vs.WT	yes
Gm38116	2.19552e+16	0.04410441659487885	0.003975330823125851	1.32904e+16	chr1	15434526	15436058	1533	+	ENSMUSG00000102937.2	TEC	KI.vs.WT	yes
Trpc4	1.47608e+16	0.04410767726303773	0.003978097125349087	2.67539e+16	chr3	54063456	54225892	162437	+	ENSMUSG00000027748.12	protein_coding	KI.vs.WT	yes
Gm37677	1739162617214160	0.044257062774215185	0.003995997174106456	4111784566475520	chr1	134747654	134755287	7634	-	ENSMUSG00000103976.2	TEC	KI.vs.WT	yes
Atl1	0.9321913594897854	0.044257062774215185	0.003996534511464207	3.03614e+16	chr12	69939388	70013191	73804	+	ENSMUSG00000021066.10	protein_coding	KI.vs.WT	yes
Gm37560	-1.74808e+16	0.044257062774215185	0.0039992622785556715	1.51837e+16	chr9	88614051	88615050	1000	+	ENSMUSG00000103165.2	TEC	KI.vs.WT	yes
Gm44677	1.782e+16	0.044257062774215185	0.0040014933999332454	1.65915e+16	chr7	91276480	91280218	3739	+	ENSMUSG00000109505.2	TEC	KI.vs.WT	yes
Gfap	-0.81886805312684	0.04434222035288038	0.004011678455692205	5.03514e+16	chr11	102778162	102791738	13577	-	ENSMUSG00000020932.15	protein_coding	KI.vs.WT	yes
Polg2	-0.7742606111880959	0.04435858139870946	0.004015645121015459	3366652392235070	chr11	106659079	106670363	11285	-	ENSMUSG00000020718.13	protein_coding	KI.vs.WT	yes
Camkv	0.8902263628386876	0.044393054462330855	0.004021254260713378	4982106657849410	chr9	107812873	107826890	14018	+	ENSMUSG00000032936.14	protein_coding	KI.vs.WT	yes
Saysd1	-0.6565124700753847	0.044415356876644406	0.004025764129458184	2.69519e+16	chr14	20125704	20188602	62899	-	ENSMUSG00000045107.6	protein_coding	KI.vs.WT	yes
Cntn6	1.89469e+16	0.044423685409788825	0.004029009136381071	-0.05659246631438044	chr6	104469751	104840367	370617	+	ENSMUSG00000030092.15	protein_coding	KI.vs.WT	yes
ENSMUSG00000121040	-1283495682316150	0.044435939241886095	0.0040351104006625515	0.5214804385931561	chr5	115627692	115628068	377	-	ENSMUSG00000121040.1	lncRNA	KI.vs.WT	yes
Fbl	-0.4350302796308385	0.044435939241886095	0.004035960077954515	5059891225484440	chr7	27869135	27878694	9560	+	ENSMUSG00000046865.8	protein_coding	KI.vs.WT	no
Fbxo21	0.39585190891597194	0.044435939241886095	0.004037592909814875	4395081228475290	chr5	118114795	118148266	33472	+	ENSMUSG00000032898.10	protein_coding	KI.vs.WT	no
Gm42440	2.02768e+16	0.044732311904103844	0.004067029703388814	2.02245e+16	chr5	131961235	131963518	2284	-	ENSMUSG00000105720.2	TEC	KI.vs.WT	yes
Vstm2b	1.40536e+16	0.04486201434402157	0.0040813368430687785	0.6447576669800441	chr7	40547752	40580018	32267	+	ENSMUSG00000039257.12	protein_coding	KI.vs.WT	yes
Ptpn3	1292982939867210	0.045014019660333485	0.004097688785223183	2163643054692110	chr4	57190841	57301837	110997	-	ENSMUSG00000038764.15	protein_coding	KI.vs.WT	yes
Gm48706	1.69796e+16	0.045137739296423215	0.004111481298020613	0.5201315880207883	chr13	35982733	35986119	3387	+	ENSMUSG00000114555.2	TEC	KI.vs.WT	yes
Bet1l	-0.7383703387944588	0.04514807766665151	0.004114953715581578	2.59481e+16	chr7	140433307	140437490	4184	-	ENSMUSG00000025484.10	protein_coding	KI.vs.WT	yes
Oxr1	0.33908475246542324	0.04515089052205851	0.004117740968575628	6661424588039260	chr15	41310878	41724444	413567	+	ENSMUSG00000022307.17	protein_coding	KI.vs.WT	no
A430057M04Rik	-1.21913e+16	0.04519489794816156	0.004125951975483948	1.04591e+16	chr14	21897646	21906999	9354	+	ENSMUSG00000090564.10	lncRNA	KI.vs.WT	yes
ENSMUSG00000121163	-1.10786e+16	0.04519489794816156	0.004126821118697039	1.99331e+16	chr8	123291671	123292699	1029	+	ENSMUSG00000121163.1	lncRNA	KI.vs.WT	yes
Cacnb3	0.5987635207304911	0.04520975472794945	0.0041313818196668595	4733622103595340	chr15	98528721	98542410	13690	+	ENSMUSG00000003352.15	protein_coding	KI.vs.WT	yes
Gm13562	1.51281e+16	0.04520975472794945	0.00413518979630157	0.8642033921222215	chr2	26242657	26261964	19308	+	ENSMUSG00000086779.2	lncRNA	KI.vs.WT	yes
Sf3a2	-0.45261620107471023	0.04520975472794945	0.00413578025313977	485490099668179	chr10	80634032	80640758	6727	+	ENSMUSG00000020211.16	protein_coding	KI.vs.WT	no
Klf2	-1.6936e+16	0.045323888842902754	0.004150040098853415	6572213675198630	chr8	73072877	73075500	2624	+	ENSMUSG00000055148.8	protein_coding	KI.vs.WT	yes
Nfkbie	-0.8130801642249075	0.045323888842902754	0.004151422546887724	5933161422051800	chr17	45866629	45874095	7467	+	ENSMUSG00000023947.9	protein_coding	KI.vs.WT	yes
Gm16098	-1.69836e+16	0.045323888842902754	0.004153842951689799	0.5339293858212157	chr2	155668069	155670794	2726	+	ENSMUSG00000086754.3	lncRNA	KI.vs.WT	yes
Klf13	-0.3695287180276103	0.04548547718402841	0.004172556190436946	6377852613341870	chr7	63536099	63588663	52565	-	ENSMUSG00000052040.11	protein_coding	KI.vs.WT	no
E130208F15Rik	-1.3089e+16	0.04548547718402841	0.00417375146582144	2.35543e+16	chr7	30021165	30022897	1733	+	ENSMUSG00000074210.4	protein_coding	KI.vs.WT	yes
Itpkc	-0.5245272434622313	0.04549719892260385	0.0041775995518892155	4261748213772070	chr7	26906597	26928086	21490	-	ENSMUSG00000003752.10	protein_coding	KI.vs.WT	yes
Necab1	0.895575836033899	0.04549719892260385	0.004179927636443257	2354187787093200	chr4	14952245	15149794	197550	-	ENSMUSG00000040536.16	protein_coding	KI.vs.WT	yes
Ifi30	-0.4083701421753734	0.04564657774604247	0.004198240736303832	639045557277616	chr8	71215419	71219307	3889	-	ENSMUSG00000031838.11	protein_coding	KI.vs.WT	no
A230057D06Rik	1.83821e+16	0.04564657774604247	0.004198768726527786	2503613459058030	chr7	61354267	61578438	224172	-	ENSMUSG00000109394.3	lncRNA	KI.vs.WT	yes
Tcaf1	0.6080897033091072	0.04576101683878101	0.004211860406349687	5074842508815720	chr6	42644936	42687022	42087	-	ENSMUSG00000036667.15	protein_coding	KI.vs.WT	yes
Oat	-0.3237838475542906	0.04576261259018999	0.0042145724487489995	5561830671834130	chr7	132159207	132178127	18921	-	ENSMUSG00000030934.10	protein_coding	KI.vs.WT	no
Rasgrf1	1156919951511570	0.045864373648876376	0.004226515150154302	577577262763699	chr9	89791961	89909030	117070	+	ENSMUSG00000032356.13	protein_coding	KI.vs.WT	yes
Zfp869	-0.33299338261796774	0.0458839638165284	0.0042308924034859426	5326749658363020	chr8	70155306	70169633	14328	-	ENSMUSG00000054648.9	protein_coding	KI.vs.WT	no
Pmp22	-0.2789568064295015	0.04612591661165417	0.0042564433576435	6.72348e+16	chr11	63019808	63050373	30566	+	ENSMUSG00000018217.13	protein_coding	KI.vs.WT	no
Camta1	0.7753463925344802	0.04612591661165417	0.004260498679486618	5332352482628910	chr4	151001779	151946333	944555	-	ENSMUSG00000014592.22	protein_coding	KI.vs.WT	yes
Itprip	-0.8350315433005507	0.04612591661165417	0.004260959113004825	2.30372e+16	chr19	47883041	47907738	24698	-	ENSMUSG00000117975.2	protein_coding	KI.vs.WT	yes
Gm37211	3157602089946090	0.04618607863475865	0.004269105586811491	0.3256760354519346	chr1	25353357	25356789	3433	-	ENSMUSG00000104027.2	TEC	KI.vs.WT	yes
Zfp26	0.38853923070765406	0.0461939550443737	0.0042736184696205	5207882625366860	chr9	20339745	20371458	31714	-	ENSMUSG00000063108.16	protein_coding	KI.vs.WT	no
Scn1a	1.21685e+16	0.0461939550443737	0.004275012319409248	3.83033e+16	chr2	66101122	66271184	170063	-	ENSMUSG00000064329.14	protein_coding	KI.vs.WT	yes
Zfp592	-0.2480887213888275	0.04620622725957918	0.004278738084799597	6105141246527440	chr7	80643429	80694912	51484	+	ENSMUSG00000005621.12	protein_coding	KI.vs.WT	no
Esrrg	0.837950828785638	0.04625566100203306	0.004286587333306666	2358264348786530	chr1	187340988	187947082	606095	+	ENSMUSG00000026610.14	protein_coding	KI.vs.WT	yes
Etl4	1061196162716150	0.04625566100203306	0.0042885013059059795	5.40603e+16	chr2	19914591	20815524	900934	+	ENSMUSG00000036617.18	protein_coding	KI.vs.WT	yes
2610306O10Rik	1.6799e+16	0.04631798136994878	0.004296875513860159	2501247115469150	chr7	128140656	128141267	612	+	ENSMUSG00000108614.2	TEC	KI.vs.WT	yes
Nemp1	-0.6112958515990999	0.04633250413269767	0.0043025611141557125	3391949614002750	chr10	127502770	127536918	34149	+	ENSMUSG00000040195.12	protein_coding	KI.vs.WT	yes
Zkscan1	0.3290372149542095	0.04633250413269767	0.004303417003804935	6005655684617240	chr5	138083346	138106084	22739	+	ENSMUSG00000029729.13	protein_coding	KI.vs.WT	no
Hdac3	0.43785156285047283	0.04646538665820253	0.004318363849736536	4440949994498590	chr18	38068897	38088069	19173	-	ENSMUSG00000024454.17	protein_coding	KI.vs.WT	no
Phyhipl	0.5772024083168549	0.04650858472659583	0.0043258123321816425	376228796535884	chr10	70393512	70491795	98284	-	ENSMUSG00000037747.10	protein_coding	KI.vs.WT	yes
Nrcam	0.8824952252826359	0.04650858472659583	0.004327592525008356	5451894715571730	chr12	44375668	44648747	273080	+	ENSMUSG00000020598.17	protein_coding	KI.vs.WT	yes
Ncs1	0.3864564222606333	0.04655243740354913	0.004334512044442649	5056661704735910	chr2	31135835	31186001	50167	+	ENSMUSG00000062661.7	protein_coding	KI.vs.WT	no
Col22a1	-174121470791829	0.04655243740354913	0.004336891870218534	-0.1911468642746132	chr15	71667644	71906076	238433	-	ENSMUSG00000079022.11	protein_coding	KI.vs.WT	yes
Map3k20	-0.3855981353775751	0.04658718123480532	0.0043427400444776484	453384647447329	chr2	72115981	72272954	156974	+	ENSMUSG00000004085.15	protein_coding	KI.vs.WT	no
P2rx4	-0.481035185302351	0.0466701846902716	0.0043530934598997725	5.37013e+16	chr5	122845607	122867801	22195	+	ENSMUSG00000029470.16	protein_coding	KI.vs.WT	no
Zcchc18	1.04389e+16	0.0467008226113031	0.004358568926447291	3.33619e+16	chrX	135893904	135899221	5318	+	ENSMUSG00000031428.12	protein_coding	KI.vs.WT	yes
Ddi2	-0.29134718957585626	0.046750412738505435	0.004368390436324311	6409627169522510	chr4	141404860	141450730	45871	-	ENSMUSG00000078515.5	protein_coding	KI.vs.WT	no
Alyref	-0.3502540533328565	0.046750412738505435	0.0043684382306664	5094142383597220	chr11	120482947	120489191	6245	-	ENSMUSG00000025134.3	protein_coding	KI.vs.WT	no
Mthfsd	0.5573709608803901	0.046831088924762905	0.0043786018120237965	3.74314e+16	chr8	121818367	121835131	16765	-	ENSMUSG00000031816.16	protein_coding	KI.vs.WT	yes
Gm44234	2356363929620070	0.046840034135248156	0.004382746513088822	-0.6998589276153901	chr6	77300889	77301788	900	-	ENSMUSG00000108057.2	TEC	KI.vs.WT	yes
Tbc1d9	-0.3276456324057677	0.046840034135248156	0.004385973842877451	7.60921e+16	chr8	83891981	83999563	107583	+	ENSMUSG00000031709.16	protein_coding	KI.vs.WT	no
Gm7461	-1.95405e+16	0.046840034135248156	0.004389737848979611	0.9263689801885395	chr8	4727539	4728365	827	-	ENSMUSG00000048484.5	TEC	KI.vs.WT	yes
Ncoa3	-0.2455031541164307	0.046840034135248156	0.004389940418953751	8367931923035680	chr2	165834556	165915162	80607	+	ENSMUSG00000027678.18	protein_coding	KI.vs.WT	no
Cep112it	2.02814e+16	0.04693453313727465	0.004403136632076986	-0.4254836559852903	chr11	108711159	108717768	6610	+	ENSMUSG00000085811.2	lncRNA	KI.vs.WT	yes
Gm44286	1.9546e+16	0.04693453313727465	0.0044067030889235045	-0.16886832458845333	chr6	77563978	77565464	1487	-	ENSMUSG00000107707.2	TEC	KI.vs.WT	yes
Gm43466	0.9714417960772757	0.04693453313727465	0.0044083608284197235	1.81254e+16	chr3	100489630	100494843	5214	-	ENSMUSG00000105824.2	lncRNA	KI.vs.WT	yes
Pcdh11x	1.04303e+16	0.04693453313727465	0.00440932048980226	2115042927760150	chrX	119199956	119820316	620361	+	ENSMUSG00000034755.19	protein_coding	KI.vs.WT	yes
Bud31	-0.36167041944359174	0.04695727155696516	0.004414088811716961	4.73602e+16	chr5	145077172	145084888	7717	+	ENSMUSG00000038722.18	protein_coding	KI.vs.WT	no
Olfr1564	2.34744e+16	0.046963081956543015	0.004417267462056008	-0.21670158282963292	chr17	33430180	33440664	10485	-	ENSMUSG00000096169.4	protein_coding	KI.vs.WT	yes
Gm5466	1405042053754150	0.04696518809880801	0.004420446739695664	-0.22078763250582062	chr2	181538616	181540505	1890	+	ENSMUSG00000083397.2	processed_pseudogene	KI.vs.WT	yes
Btrc	0.5368018238857136	0.04696518809880801	0.004422730717824969	5001422596435520	chr19	45352173	45518452	166280	+	ENSMUSG00000025217.16	protein_coding	KI.vs.WT	yes
Gm43256	1.50826e+16	0.047008674763378736	0.0044310566613593476	0.43474377321216734	chr3	104094419	104097509	3091	-	ENSMUSG00000105818.2	lncRNA	KI.vs.WT	yes
Lrrn1	0.7035636978031301	0.047008674763378736	0.0044320959053813355	2173981167517850	chr6	107506729	107547175	40447	+	ENSMUSG00000034648.10	protein_coding	KI.vs.WT	yes
Kcnk10	1.37726e+16	0.04701346188452475	0.004435182530922374	2.3079e+16	chr12	98395696	98544569	148874	-	ENSMUSG00000033854.11	protein_coding	KI.vs.WT	yes
Gm42856	-1.32342e+16	0.047095925843962036	0.004445601968678927	1.49191e+16	chr6	24657517	24660368	2852	-	ENSMUSG00000106946.2	TEC	KI.vs.WT	yes
Pparg	1.17263e+16	0.047121729067121955	0.0044523870055073285	2.39246e+16	chr6	115337912	115467360	129449	+	ENSMUSG00000000440.13	protein_coding	KI.vs.WT	yes
Erc2	0.8561316149868007	0.047121729067121955	0.004454286072126488	6115839282274590	chr14	27344385	28200494	856110	+	ENSMUSG00000040640.12	protein_coding	KI.vs.WT	yes
Myo1c	-0.39018509306282656	0.047121729067121955	0.0044566152207085	5925728806939340	chr11	75541330	75564736	23407	+	ENSMUSG00000017774.20	protein_coding	KI.vs.WT	no
Pnma8b	0.5581061376188157	0.047121729067121955	0.004458603064198535	4989681567861840	chr7	16678607	16682753	4147	+	ENSMUSG00000070802.6	protein_coding	KI.vs.WT	yes
Vezt	0.5656619894773255	0.0471648216629663	0.004465324203405274	4520676538429440	chr10	93775027	93871679	96653	-	ENSMUSG00000036099.17	protein_coding	KI.vs.WT	yes
ENSMUSG00000121066	-0.7296685458634865	0.04723399384018643	0.0044767749691077595	2.42887e+16	chr11	106047025	106047482	458	+	ENSMUSG00000121066.1	lncRNA	KI.vs.WT	yes
Epb41l3	0.5279189145077376	0.04723399384018643	0.004481788645239	6736488339172370	chr17	69382678	69596984	214307	+	ENSMUSG00000024044.20	protein_coding	KI.vs.WT	yes
Srrm4	0.9985795702318874	0.04723399384018643	0.004484585066519539	5047216202668740	chr5	116577334	116729876	152543	-	ENSMUSG00000063919.12	protein_coding	KI.vs.WT	yes
Jak3	-0.3184627328583878	0.04723399384018643	0.004485177682217777	5557266539227140	chr8	72128940	72143219	14280	+	ENSMUSG00000031805.18	protein_coding	KI.vs.WT	no
Gm13375	-1.40451e+16	0.04723399384018643	0.004487193882379093	0.9865406599998693	chr2	20973833	20975168	1336	+	ENSMUSG00000075514.6	lncRNA	KI.vs.WT	yes
Zswim6	-0.27264330345695936	0.04723399384018643	0.00449036670734408	672615010549469	chr13	107861152	108026598	165447	-	ENSMUSG00000032846.13	protein_coding	KI.vs.WT	no
Tceal1	-0.44702172070844287	0.04723399384018643	0.004493350691875214	4058720389801770	chrX	135608731	135612227	3497	+	ENSMUSG00000049536.6	protein_coding	KI.vs.WT	no
H2ac5-ps	-3.43662e+16	0.04723399384018643	0.004494903013783624	-0.2648394451180038	chr13	23930149	23930482	334	-	ENSMUSG00000080999.2	unprocessed_pseudogene	KI.vs.WT	yes
Gm43039	-1099397865427410	0.04723399384018643	0.004498341863909351	0.13945729146891084	chr5	92105859	92106821	963	-	ENSMUSG00000107200.2	TEC	KI.vs.WT	yes
Robo1	0.7590630225561028	0.04723399384018643	0.004498349525475154	2.91759e+16	chr16	72105194	72842983	737790	+	ENSMUSG00000022883.12	protein_coding	KI.vs.WT	yes
Gm28578	1.77007e+16	0.04725466928829159	0.004505496472051361	0.3443933352182988	chr19	45288894	45326874	37981	-	ENSMUSG00000100417.4	lncRNA	KI.vs.WT	yes
Rhbdf2	-0.5266669957105656	0.04725466928829159	0.004508311588605181	3931383172638580	chr11	116488991	116517845	28855	-	ENSMUSG00000020806.16	protein_coding	KI.vs.WT	yes
C130073E24Rik	1.70219e+16	0.04725466928829159	0.004510486067606619	2889692367309350	chr8	51196326	51370032	173707	-	ENSMUSG00000110246.3	lncRNA	KI.vs.WT	yes
Gadd45g	1.02558e+16	0.04725466928829159	0.004510913777912589	4836172893092530	chr13	52000714	52002504	1791	+	ENSMUSG00000021453.3	protein_coding	KI.vs.WT	yes
Gm13657	-1.75837e+16	0.04729818769035838	0.004521650106401481	0.7592255527949571	chr2	75607495	75612650	5156	+	ENSMUSG00000086813.3	lncRNA	KI.vs.WT	yes
Spats2l	0.9231147624260297	0.04729818769035838	0.004522752005768937	2.04494e+16	chr1	57813321	57987553	174233	+	ENSMUSG00000038305.16	protein_coding	KI.vs.WT	yes
Ica1l	1.22984e+16	0.04729818769035838	0.004523021760075751	124617070684911	chr1	60021649	60082343	60695	-	ENSMUSG00000026018.13	protein_coding	KI.vs.WT	yes
Fahd2a	0.9122904399069812	0.04731364354254117	0.004530200743712681	1934785889341240	chr2	127278135	127286485	8351	-	ENSMUSG00000027371.11	protein_coding	KI.vs.WT	yes
Slc4a10	1117335419908690	0.04731364354254117	0.004532378514540849	5068709379596890	chr2	61876806	62157074	280269	+	ENSMUSG00000026904.18	protein_coding	KI.vs.WT	yes
Hectd2	0.889843905475619	0.04731364354254117	0.004533713649465175	2528990127239610	chr19	36532039	36598535	66497	+	ENSMUSG00000041180.14	protein_coding	KI.vs.WT	yes
Reep2	0.9585249949817394	0.04731364354254117	0.004536400184951268	2864089513788580	chr18	34973642	34980516	6875	+	ENSMUSG00000038555.8	protein_coding	KI.vs.WT	yes
Zfp770	-0.4938186130384626	0.04731364354254117	0.00453776031957892	4767969913769580	chr2	114023942	114031950	8009	-	ENSMUSG00000040321.4	protein_coding	KI.vs.WT	no
Lrp3	1.0078e+16	0.0473184263290707	0.0045408714055700135	2.96081e+16	chr7	34899452	34914923	15472	-	ENSMUSG00000001802.17	protein_coding	KI.vs.WT	yes
Gm48870	121298854915656	0.04735799398427036	0.004547323077077081	1862655083797130	chr13	9394438	9398461	4024	+	ENSMUSG00000113065.2	TEC	KI.vs.WT	yes
D430041D05Rik	1.21697e+16	0.047402419060206084	0.004554245867107244	3.11696e+16	chr2	103973418	104241358	267941	-	ENSMUSG00000068373.16	protein_coding	KI.vs.WT	yes
Morc4	1.30209e+16	0.04740539595967296	0.004564370281955017	2192954471942420	chrX	138722381	138772426	50046	-	ENSMUSG00000031434.16	protein_coding	KI.vs.WT	yes
Zfp955b	0.6351828612631742	0.04740539595967296	0.004565930930121958	3406272129455570	chr17	33508518	33526215	17698	+	ENSMUSG00000096910.3	protein_coding	KI.vs.WT	yes
Gm20100	-1.41183e+16	0.04740539595967296	0.004569944749992477	2.74437e+16	chr8	11507471	11509742	2272	-	ENSMUSG00000110245.2	TEC	KI.vs.WT	yes
Gria3	1.51515e+16	0.04740539595967296	0.004571741864220133	4343485991058980	chrX	40489731	40767478	277748	+	ENSMUSG00000001986.17	protein_coding	KI.vs.WT	yes
Il2rb	-2.40118e+16	0.04740539595967296	0.00457218989722248	0.07619115262629877	chr15	78363456	78379471	16016	-	ENSMUSG00000068227.10	protein_coding	KI.vs.WT	yes
Mlxip	-0.5212036375359593	0.04740539595967296	0.004573592225629118	6355010142223570	chr5	123532861	123595995	63135	+	ENSMUSG00000038342.16	protein_coding	KI.vs.WT	yes
Tspan9	-0.3338881099205121	0.04740539595967296	0.004574094010862162	4.10911e+16	chr6	127938359	128120557	182199	-	ENSMUSG00000030352.16	protein_coding	KI.vs.WT	no
Gxylt2	1.4497e+16	0.04740539595967296	0.004575789901488612	-0.24176872144861195	chr6	100681695	100787874	106180	+	ENSMUSG00000030074.10	protein_coding	KI.vs.WT	yes
Msra	0.7298494002014644	0.04741225519383367	0.0045812846870726285	3.58813e+16	chr14	64360074	64693352	333279	-	ENSMUSG00000054733.10	protein_coding	KI.vs.WT	yes
Cacng2	1.1836e+16	0.04741225519383367	0.004581767262005003	2.27595e+16	chr15	77875948	78004228	128281	-	ENSMUSG00000019146.3	protein_coding	KI.vs.WT	yes
Gm43936	-1.43268e+16	0.04745956392178748	0.004592127123819473	269621796782657	chr6	86470198	86470891	694	-	ENSMUSG00000107876.2	lncRNA	KI.vs.WT	yes
Rsf1os2	-1.88755e+16	0.04745956392178748	0.004592438167272552	0.30039169570983637	chr7	97299217	97346035	46819	-	ENSMUSG00000086993.2	lncRNA	KI.vs.WT	yes
Mrps35	0.4235261281004793	0.04745956392178748	0.004594319893101289	3936487016892790	chr6	146944262	146975489	31228	+	ENSMUSG00000040112.10	protein_coding	KI.vs.WT	no
Gm42577	2.50695e+16	0.04751482854425577	0.0046023331684122174	-0.3273934885171227	chr5	75146517	75149727	3211	-	ENSMUSG00000107306.2	TEC	KI.vs.WT	yes
Fam110b	125379379315675	0.04776537825813588	0.004629279092394447	1886423211784800	chr4	5644090	6108223	464134	+	ENSMUSG00000049119.15	protein_coding	KI.vs.WT	yes
Dzank1	0.7652972660068238	0.047836643558023424	0.004638867340548236	3352015440471860	chr2	144312477	144369334	56858	-	ENSMUSG00000037259.16	protein_coding	KI.vs.WT	yes
Rian	1.5607e+16	0.047845074032172606	0.004644406082060568	5563938850135240	chr12	109570242	109628150	57909	+	ENSMUSG00000097451.12	lncRNA	KI.vs.WT	yes
Cnrip1	0.44955621843521537	0.047845074032172606	0.004645048667249044	3.73084e+16	chr11	17001586	17029371	27786	+	ENSMUSG00000044629.6	protein_coding	KI.vs.WT	no
Syt6	1.00844e+16	0.047925915707657266	0.004658090466684548	5114054764128680	chr3	103482547	103552885	70339	+	ENSMUSG00000027849.20	protein_coding	KI.vs.WT	yes
Ing2	-0.49588704814122175	0.047925915707657266	0.004658270058132158	37424567326476	chr8	48120213	48128591	8379	-	ENSMUSG00000063049.5	protein_coding	KI.vs.WT	no
Kctd1	0.773670462754177	0.047953884152083445	0.004663676513669551	2807469342660120	chr18	15101742	15284503	182762	-	ENSMUSG00000036225.16	protein_coding	KI.vs.WT	yes
Gm19582	-1.13039e+16	0.04807670041404936	0.004678315690515117	1.30335e+16	chr1	87781069	87782021	953	-	ENSMUSG00000101942.2	lncRNA	KI.vs.WT	yes
Gm18875	1.96907e+16	0.048092696651364626	0.004682568054003383	0.6100196315070212	chr1	123732269	123733150	882	-	ENSMUSG00000101994.2	processed_pseudogene	KI.vs.WT	yes
Sp8	0.8564772086994704	0.04813586224010346	0.004689469090431604	3.15208e+16	chr12	118810064	118816311	6248	+	ENSMUSG00000048562.8	protein_coding	KI.vs.WT	yes
Zfp59	0.5504628961519654	0.0481679167182538	0.004695291881897049	2579489934544090	chr7	27538032	27555863	17832	+	ENSMUSG00000078779.5	protein_coding	KI.vs.WT	yes
Dscam	1.02425e+16	0.048221880076569544	0.0047032551195757295	5307365282670350	chr16	96392040	96971952	579913	-	ENSMUSG00000050272.11	protein_coding	KI.vs.WT	yes
A330076H08Rik	1.99349e+16	0.048489825742016573	0.004734465030883217	1.63938e+16	chr7	61579885	61632106	52222	-	ENSMUSG00000109321.2	lncRNA	KI.vs.WT	yes
9330133O14Rik	-0.7363222786856847	0.048489825742016573	0.004735116108969567	3530224990947090	chr8	123170365	123173215	2851	+	ENSMUSG00000121107.1	lncRNA	KI.vs.WT	yes
Adgrb3	1.44094e+16	0.048489825742016573	0.004737542952260924	4686909627704030	chr1	25106557	25868788	762232	-	ENSMUSG00000033569.18	protein_coding	KI.vs.WT	yes
Zswim9	0.7424095547068512	0.04859720373524019	0.004752709962384427	3.20821e+16	chr7	12992894	13012647	19754	-	ENSMUSG00000070814.18	protein_coding	KI.vs.WT	yes
B4galt3	-0.5714305514167016	0.04859720373524019	0.004754311507160615	4513221670676090	chr1	171097898	171104469	6572	+	ENSMUSG00000052423.16	protein_coding	KI.vs.WT	yes
Airn	177534515228576	0.04859720373524019	0.004758288570276697	2.75457e+16	chr17	12960198	13079023	118826	+	ENSMUSG00000078247.7	lncRNA	KI.vs.WT	yes
Add2	0.9637898651926609	0.04859720373524019	0.004763086825648257	564134063167171	chr6	86005663	86101391	95729	+	ENSMUSG00000030000.11	protein_coding	KI.vs.WT	yes
Cacna1a	0.9347825096598393	0.04859720373524019	0.004765221448373901	6.577e+16	chr8	85065268	85366875	301608	+	ENSMUSG00000034656.19	protein_coding	KI.vs.WT	yes
Gm6058	1.83663e+16	0.04859720373524019	0.004765524989405881	0.21167436289263794	chr1	157211501	157211899	399	-	ENSMUSG00000087632.2	processed_pseudogene	KI.vs.WT	yes
Gm42438	2.24007e+16	0.04859720373524019	0.004767102384342507	0.26739554577017344	chr5	131986431	131987404	974	-	ENSMUSG00000106356.2	TEC	KI.vs.WT	yes
Gm42943	2.01036e+16	0.048719951627739615	0.0047846243958084705	0.7048487988306238	chr3	156436735	156439976	3242	+	ENSMUSG00000106385.2	TEC	KI.vs.WT	yes
Trps1	0.45231776831969034	0.048719951627739615	0.004784977095854154	4270210540374920	chr15	50518148	50753859	235712	-	ENSMUSG00000038679.17	protein_coding	KI.vs.WT	no
Birc3	-0.6235319203571146	0.048719951627739615	0.004788340458217627	5808263767064840	chr9	7848700	7873187	24488	-	ENSMUSG00000032000.18	protein_coding	KI.vs.WT	yes
Steap2	1006413472975190	0.048719951627739615	0.004790066992996373	1.12004e+16	chr5	5714829	5744578	29750	-	ENSMUSG00000015653.14	protein_coding	KI.vs.WT	yes
Abi3bp	0.9327127034969792	0.04876666524354944	0.0047973933577594875	2.93527e+16	chr16	56298241	56510498	212258	+	ENSMUSG00000035258.16	protein_coding	KI.vs.WT	yes
Anks1b	0.8837837866032133	0.04890953606067016	0.004815523487476559	4840227722933210	chr10	89709371	90809162	1099792	+	ENSMUSG00000058589.15	protein_coding	KI.vs.WT	yes
Cd164l2	1.78567e+16	0.04890953606067016	0.004816931326154567	-0.33814319348083666	chr4	132939442	132951866	12425	+	ENSMUSG00000028865.15	protein_coding	KI.vs.WT	yes
Gm44846	3151390736408190	0.04900794572763446	0.004829370436613306	-0.26957270838764663	chr7	87768366	87771608	3243	+	ENSMUSG00000108993.2	TEC	KI.vs.WT	yes
ENSMUSG00000120864	-1.08745e+16	0.04922742826266339	0.004853758201458795	2371631957929290	chr2	32856374	32856931	558	-	ENSMUSG00000120864.1	lncRNA	KI.vs.WT	yes
Gm48673	1897869792846010	0.04923597688382743	0.004857360948180284	-0.17991508184550106	chr9	26932849	26936217	3369	-	ENSMUSG00000111505.2	TEC	KI.vs.WT	yes
Neto1	0.9707364166069712	0.0492451970653772	0.00486151194938564	3628968069198800	chr18	86413077	86524843	111767	+	ENSMUSG00000050321.4	protein_coding	KI.vs.WT	yes
Hook1	1.28172e+16	0.0492451970653772	0.004863791324506425	3.06808e+16	chr4	95855477	95913650	58174	+	ENSMUSG00000028572.14	protein_coding	KI.vs.WT	yes
3110062G12Rik	1.6663e+16	0.04927777588327111	0.0048697712377918706	0.3193323298117939	chr1	176573130	176574548	1419	-	ENSMUSG00000103634.2	TEC	KI.vs.WT	yes
Afap1l1	-0.448310013155675	0.049301083469559435	0.004874838074008007	5275737450114310	chr18	61863332	61919773	56442	-	ENSMUSG00000033032.16	protein_coding	KI.vs.WT	no
Osbpl6	1.08693e+16	0.049312501808316804	0.004878731260744347	2.22528e+16	chr2	76236852	76430991	194140	+	ENSMUSG00000042359.19	protein_coding	KI.vs.WT	yes
Nalcn	1.09898e+16	0.04939149811904322	0.0048893153407079774	3665453517194020	chr14	123514046	123864556	350511	-	ENSMUSG00000000197.9	protein_coding	KI.vs.WT	yes
Amigo2	1.24287e+16	0.04940071396864847	0.004892996725482167	1.96082e+16	chr15	97142006	97145168	3163	-	ENSMUSG00000048218.7	protein_coding	KI.vs.WT	yes
B4galt1	-0.4106094845017505	0.04940754360264456	0.00489644266196612	718415598419035	chr4	40804602	40854005	49404	-	ENSMUSG00000028413.14	protein_coding	KI.vs.WT	no
Galnt16	0.8786455944604182	0.04943984599806974	0.004903310633933532	3.7064e+16	chr12	80565051	80677746	112696	+	ENSMUSG00000021130.9	protein_coding	KI.vs.WT	yes
Psd4	-0.27503845619870626	0.04943984599806974	0.004905755445004236	5904545841574560	chr2	24257592	24304966	47375	+	ENSMUSG00000026979.17	protein_coding	KI.vs.WT	no
Gm10434	-1.88842e+16	0.04943984599806974	0.004907957806198515	-0.481017325943231	chr11	59099072	59099546	475	-	ENSMUSG00000072898.4	pseudogene	KI.vs.WT	yes
Gm48357	1.54302e+16	0.049468873457608316	0.004913612318771409	-0.5993616695504689	chr13	58332710	58339132	6423	-	ENSMUSG00000114524.2	lncRNA	KI.vs.WT	yes
Aff1	-0.4030938033088491	0.049601704493163166	0.004929586438698334	6951758634597670	chr5	103840240	104003188	162949	+	ENSMUSG00000029313.19	protein_coding	KI.vs.WT	no
Gm31513	-2.18715e+16	0.049718145973548344	0.004943945681450379	-0.13761940733141959	chr12	84242743	84246354	3612	+	ENSMUSG00000113052.2	lncRNA	KI.vs.WT	yes
Rufy2	0.8490627742968784	0.049846434779316176	0.004964655358879721	4.75634e+16	chr10	62816002	62852989	36988	+	ENSMUSG00000020070.19	protein_coding	KI.vs.WT	yes
Gm15417	-1.41615e+16	0.049846434779316176	0.004965262738504938	1.19088e+16	chr3	89296640	89306097	9458	+	ENSMUSG00000074466.14	lncRNA	KI.vs.WT	yes
Rbm5	-0.2583575504448348	0.049846434779316176	0.004965963177182422	7513076640704680	chr9	107617570	107648195	30626	-	ENSMUSG00000032580.13	protein_coding	KI.vs.WT	no
Scn3b	0.9893559987481779	0.049846434779316176	0.004970050905032014	2817879968001970	chr9	40180513	40202914	22402	+	ENSMUSG00000049281.17	protein_coding	KI.vs.WT	yes
Gm50345	-1355335968652950	0.049846434779316176	0.004972176959254513	2.74011e+16	chr19	9916630	9918016	1387	+	ENSMUSG00000118183.2	TEC	KI.vs.WT	yes
Marchf7	-0.33397248332473484	0.049846434779316176	0.004975460160539195	6173203170832880	chr2	60040231	60081020	40790	+	ENSMUSG00000026977.18	protein_coding	KI.vs.WT	no
Rasgrf2	0.8094895626798126	0.049846434779316176	0.004976261229930612	4395289303595140	chr13	92028519	92268164	239646	-	ENSMUSG00000021708.19	protein_coding	KI.vs.WT	yes
Ppp2r2b	0.8730758032153801	0.04987041438981712	0.004981450585350567	3325490036777670	chr18	42770497	43216192	445696	-	ENSMUSG00000024500.21	protein_coding	KI.vs.WT	yes
Clmp	-0.8290584854977813	0.049937321986352395	0.004991842270956231	2218268866049540	chr9	40597258	40696615	99358	+	ENSMUSG00000032024.11	protein_coding	KI.vs.WT	yes
Sp9	0.8633323443760567	0.049937321986352395	0.004993732198635239	3172962486208720	chr2	73102269	73115050	12782	+	ENSMUSG00000068859.6	protein_coding	KI.vs.WT	yes
1700095J07Rik	-2.03864e+16	0.04996787556267754	0.004999588446153554	-0.6727211454492392	chr6	30304604	30331778	27175	+	ENSMUSG00000084861.2	lncRNA	KI.vs.WT	yes
Pcdh10	0.6807883451410159	0.05002984085944392	0.005008592812498141	5.50174e+16	chr3	45332833	45390058	57226	+	ENSMUSG00000049100.16	protein_coding	KI.vs.WT	yes
Gm13868	1.40902e+16	0.05007422609897	0.005015843163613195	0.4714584684172131	chr2	102142259	102142552	294	-	ENSMUSG00000083306.2	processed_pseudogene	KI.vs.WT	yes
Lrtm2	1.1032e+16	0.050080826406194386	0.005019311525463877	2.5157e+16	chr6	119292094	119307727	15634	-	ENSMUSG00000055003.15	protein_coding	KI.vs.WT	yes
Mgat4c	1.51131e+16	0.05014260471229506	0.005029626497856772	0.5092706726392411	chr10	101517348	102227330	709983	+	ENSMUSG00000019888.17	protein_coding	KI.vs.WT	yes
Gm27032	1.13859e+16	0.05014260471229506	0.005033169891707683	2.97424e+16	chr2	180535898	180537013	1116	+	ENSMUSG00000098051.2	lncRNA	KI.vs.WT	yes
Smim35	-1.29645e+16	0.05014260471229506	0.005033935260074016	1.14608e+16	chr9	45093305	45161318	68014	+	ENSMUSG00000091996.9	protein_coding	KI.vs.WT	yes
Epb41l4aos	-0.844165989050659	0.05025520178687899	0.005048056143614751	1.55317e+16	chr18	33927889	33929050	1162	+	ENSMUSG00000087590.4	lncRNA	KI.vs.WT	yes
ENSMUSG00000120880	-1.41627e+16	0.05026170258872201	0.005051526498967408	0.8077239540428265	chr11	70545947	70546525	579	+	ENSMUSG00000120880.1	lncRNA	KI.vs.WT	yes
Gm44237	1.58638e+16	0.05028199333706948	0.005058398357611701	-0.48907845767900426	chr6	116366423	116367358	936	+	ENSMUSG00000107556.2	TEC	KI.vs.WT	yes
ENSMUSG00000120772	-1.99369e+16	0.05028199333706948	0.005059202804934962	-0.3151384749204804	chr9	83716070	83716646	577	-	ENSMUSG00000120772.1	lncRNA	KI.vs.WT	yes
Zfp710	-0.29802682165085137	0.050566524107248406	0.005090665767747654	7.84469e+16	chr7	79674562	79743921	69360	+	ENSMUSG00000048897.16	protein_coding	KI.vs.WT	no
ENSMUSG00000121250	1.85137e+16	0.050575387324157575	0.005097271802960817	-0.07147662048843549	chr2	68693626	68695207	1582	+	ENSMUSG00000121250.1	lncRNA	KI.vs.WT	yes
2900079G21Rik	1.3287e+16	0.050575387324157575	0.005099611073210798	1.26175e+16	chr9	112063266	112177993	114728	+	ENSMUSG00000087038.11	lncRNA	KI.vs.WT	yes
Pacsin1	0.6405566123799598	0.050575387324157575	0.005100290498538089	5913670274329860	chr17	27874483	27930456	55974	+	ENSMUSG00000040276.16	protein_coding	KI.vs.WT	yes
Gm48225	1.90199e+16	0.050575387324157575	0.005102897824186302	0.7243896661598695	chr12	78308067	78313149	5083	+	ENSMUSG00000112637.2	TEC	KI.vs.WT	yes
Rnf32	1.78282e+16	0.05073775623276131	0.005122124382018112	0.19784016339011876	chr5	29400990	29433455	32466	+	ENSMUSG00000029130.13	protein_coding	KI.vs.WT	yes
Trhde	1.00334e+16	0.05079190751486496	0.005130438191804185	3.582e+16	chr10	114234726	114638212	403487	-	ENSMUSG00000050663.9	protein_coding	KI.vs.WT	yes
Septin3	0.5050139053134647	0.05079370082924798	0.005133968630934191	4.50158e+16	chr15	82153003	82178775	25773	+	ENSMUSG00000022456.19	protein_coding	KI.vs.WT	yes
Sh3bgrl2	0.6769712903783871	0.05079370082924798	0.005138901649467981	3.93241e+16	chr9	83430380	83520854	90475	+	ENSMUSG00000032261.17	protein_coding	KI.vs.WT	yes
Stx1b	0.5262622152015901	0.05079370082924798	0.005139160874259675	5607350352481430	chr7	127403072	127423721	20650	-	ENSMUSG00000030806.7	protein_coding	KI.vs.WT	yes
Tmem199	-0.5926209843577973	0.05090768761310745	0.005153547299847089	3.40022e+16	chr11	78397881	78402998	5118	-	ENSMUSG00000051232.14	protein_coding	KI.vs.WT	yes
Gm47016	2342530496653180	0.050912942179481314	0.005156933100802844	-0.15843988963064892	chr10	49537743	49539369	1627	-	ENSMUSG00000112340.2	TEC	KI.vs.WT	yes
Rpp38	-0.8305685214456761	0.050956967228726786	0.005164248696722984	1.45236e+16	chr2	3329986	3333680	3695	-	ENSMUSG00000049950.7	protein_coding	KI.vs.WT	yes
1700025G04Rik	0.6045876785058424	0.05097851285660186	0.005169289784618429	4175698021571820	chr1	151728154	151965876	237723	-	ENSMUSG00000032666.17	protein_coding	KI.vs.WT	yes
Gm19035	2651350233317890	0.05106382244239298	0.005180802613269691	-0.33188308433589714	chr18	37213047	37215510	2464	+	ENSMUSG00000102232.2	transcribed_processed_pseudogene	KI.vs.WT	yes
Macrod2	1.00921e+16	0.05115480226538273	0.005192900611132742	3.19787e+16	chr2	140237229	142234886	1997658	+	ENSMUSG00000068205.15	protein_coding	KI.vs.WT	yes
Zfp977	1.64817e+16	0.05118569835904508	0.005198906133777449	-0.1819933107479834	chr7	42226955	42242009	15055	-	ENSMUSG00000092335.3	protein_coding	KI.vs.WT	yes
Slc16a6	-0.42472301047787125	0.05124088423139298	0.005207383582484052	6723192925773520	chr11	109341681	109364424	22744	-	ENSMUSG00000041920.15	protein_coding	KI.vs.WT	no
Jph4	0.8476506162341961	0.051400844329235675	0.005226520830338201	4283451762265820	chr14	55344283	55354392	10110	-	ENSMUSG00000022208.13	protein_coding	KI.vs.WT	yes
Trpm2	-0.3006708491283157	0.05146273085038624	0.005235698233937837	6434109592605640	chr10	77743556	77806397	62842	-	ENSMUSG00000009292.19	protein_coding	KI.vs.WT	no
Stx5a	-0.305211043502508	0.051521519987447646	0.005244991117539785	5350113785744940	chr19	8718777	8733433	14657	+	ENSMUSG00000010110.18	protein_coding	KI.vs.WT	no
Cntnap3	1.35769e+16	0.051521519987447646	0.005247455258811232	1771183225046720	chr13	64883996	65051769	167774	-	ENSMUSG00000033063.9	protein_coding	KI.vs.WT	yes
Gna13	-0.2568989289600808	0.051601938117973284	0.005258538312694811	760180758496147	chr11	109253657	109292195	38539	+	ENSMUSG00000020611.15	protein_coding	KI.vs.WT	no
Hdgfl3	0.5832356342853423	0.05160352681396785	0.005261592784451094	4101594225577270	chr7	81530999	81584221	53223	-	ENSMUSG00000025104.14	protein_coding	KI.vs.WT	yes
Crybg3	-0.42310054855620066	0.05177917616860003	0.005282404743657626	635393258256246	chr16	59311138	59421342	110205	-	ENSMUSG00000022723.17	protein_coding	KI.vs.WT	no
Gm5124	0.8775475566640945	0.051792714856960055	0.00528965523603441	1.70127e+16	chrX	21227075	21230871	3797	+	ENSMUSG00000051537.11	transcribed_processed_pseudogene	KI.vs.WT	yes
ENSMUSG00000121137	-1298736499627960	0.051792714856960055	0.005290196619488962	0.9504962096722417	chr12	8622155	8638094	15940	+	ENSMUSG00000121137.1	lncRNA	KI.vs.WT	yes
Cramp1	-0.24559156466560605	0.051792714856960055	0.005292495469968508	5860305583707220	chr17	25180200	25234762	54563	-	ENSMUSG00000038002.10	protein_coding	KI.vs.WT	no
Cry2	0.601021913058355	0.051871177791052374	0.005303420868322843	4365356192870570	chr2	92233991	92264388	30398	-	ENSMUSG00000068742.12	protein_coding	KI.vs.WT	yes
Ep300	-0.28563171123257647	0.05193374917698989	0.005312729386099021	81406150671358	chr15	81469552	81536278	66727	+	ENSMUSG00000055024.13	protein_coding	KI.vs.WT	no
Ildr1	-1.01708e+16	0.05213158159247901	0.005335889461203289	2349464222223480	chr16	36514340	36547166	32827	+	ENSMUSG00000022900.15	protein_coding	KI.vs.WT	yes
Map3k8	-0.9026065609521986	0.05217536463720057	0.005343295470412861	5510476878282320	chr18	4331327	4353015	21689	-	ENSMUSG00000024235.12	protein_coding	KI.vs.WT	yes
H3c4	-0.9858558546071429	0.05224261615945342	0.005354722948786489	2.50734e+16	chr13	23759937	23761185	1249	+	ENSMUSG00000099583.3	protein_coding	KI.vs.WT	yes
Mcmdc2	1.36763e+16	0.05224261615945342	0.00535603951545069	-0.038379624205209954	chr1	9978863	10012310	33448	+	ENSMUSG00000046101.17	protein_coding	KI.vs.WT	yes
Osbpl1a	-0.3206876509893777	0.052410154024065736	0.00537615369193051	5401307713334880	chr18	12888371	13074898	186528	-	ENSMUSG00000044252.19	protein_coding	KI.vs.WT	no
4933427D14Rik_ENSMUSG00000107877.3	1406536925221900	0.05242204608855013	0.005380312017272158	2.20364e+16	chr11	72044923	72097852	52930	-	ENSMUSG00000107877.3	protein_coding	KI.vs.WT	yes
Foxk1	-0.27354048073193155	0.0524503547467583	0.005386157505384596	6049864627269150	chr5	142387252	142447766	60515	+	ENSMUSG00000056493.10	protein_coding	KI.vs.WT	no
Eaf2	-1469689584677400	0.05262924757717239	0.0054074781843585756	0.7995176393596461	chr16	36613246	36695365	82120	-	ENSMUSG00000022838.15	protein_coding	KI.vs.WT	yes
Ephb1	0.877629869829053	0.05279488394340017	0.005427456118396632	132194977978211	chr9	101799327	102231892	432566	-	ENSMUSG00000032537.16	protein_coding	KI.vs.WT	yes
Gm37980	2.38306e+16	0.05280442657696052	0.005432667523199999	-0.5887361634537084	chr12	89220222	89222131	1910	-	ENSMUSG00000103136.2	TEC	KI.vs.WT	yes
Gm16008	1.35823e+16	0.05280442657696052	0.0054343569055661164	1.30542e+16	chr4	156106465	156116120	9656	-	ENSMUSG00000087381.10	lncRNA	KI.vs.WT	yes
Atad2	-0.5701810960009831	0.052955760877755616	0.005452899816840643	4822058055580120	chr15	57957440	57998478	41039	-	ENSMUSG00000022360.9	protein_coding	KI.vs.WT	yes
E130307A14Rik	0.846288707281723	0.05339380440081863	0.005500998457887032	4449917455688240	chr10	39497408	39608012	110605	-	ENSMUSG00000087177.9	lncRNA	KI.vs.WT	yes
Kctd4	1.34558e+16	0.053405749730668646	0.005505222744097513	-0.11042636306321245	chr14	76192449	76203646	11198	+	ENSMUSG00000046523.6	protein_coding	KI.vs.WT	yes
Myh7	1.22609e+16	0.053538572523065917	0.005523115007041165	0.5816168986777648	chr14	55208141	55232083	23943	-	ENSMUSG00000053093.17	protein_coding	KI.vs.WT	yes
Gm37943	1.16218e+16	0.053538572523065917	0.00552491659276706	1.44254e+16	chr1	156699747	156703690	3944	-	ENSMUSG00000102960.2	TEC	KI.vs.WT	yes
Cdr2l	0.8458871989407811	0.05359175844170764	0.005536338408705776	2819935624429660	chr11	115272742	115286958	14217	+	ENSMUSG00000050910.6	protein_coding	KI.vs.WT	yes
ENSMUSG00000120228	-228040474130901	0.05359175844170764	0.005536413161887173	-0.18132413048873663	chr4	126150410	126152224	1815	+	ENSMUSG00000120228.1	lncRNA	KI.vs.WT	yes
Rbfox2	0.8540102795728485	0.053797218128387524	0.005563888502662084	5413198436422040	chr15	76963190	77191204	228015	-	ENSMUSG00000033565.19	protein_coding	KI.vs.WT	yes
Prmt3	0.4046586748210748	0.053797218128387524	0.005565685907165006	4046760407921810	chr7	49428094	49508013	79920	+	ENSMUSG00000030505.18	protein_coding	KI.vs.WT	no
Ppp1r12b	0.700282513257591	0.053797218128387524	0.0055666852390696955	6971171789753030	chr1	134682396	134883680	201285	-	ENSMUSG00000073557.13	protein_coding	KI.vs.WT	yes
Gm42993	2023020308302950	0.05387116719367245	0.00557735682773055	3.09202e+16	chr5	132044449	132051773	7325	-	ENSMUSG00000105985.2	TEC	KI.vs.WT	yes
Sez6	0.9845921482675007	0.053894802237241655	0.005582898005131913	5.6635e+16	chr11	77821626	77869874	48249	+	ENSMUSG00000000632.14	protein_coding	KI.vs.WT	yes
Gm17276	144105753581435	0.053894802237241655	0.00559503718980589	0.5271973466330832	chr17	32332385	32360817	28433	+	ENSMUSG00000097305.4	lncRNA	KI.vs.WT	yes
Nr1h2	-0.26252448940460615	0.053894802237241655	0.00559945720377872	5642699922008620	chr7	44199040	44203375	4336	-	ENSMUSG00000060601.14	protein_coding	KI.vs.WT	no
As3mt	-0.37941301459945687	0.053894802237241655	0.00560363806673409	4.81488e+16	chr19	46695897	46729538	33642	+	ENSMUSG00000003559.9	protein_coding	KI.vs.WT	no
Sp7	1.27521e+16	0.053894802237241655	0.005605272641738497	1.30829e+16	chr15	102265041	102275617	10577	-	ENSMUSG00000060284.8	protein_coding	KI.vs.WT	yes
Scgn	1.13831e+16	0.053894802237241655	0.005605871934038814	0.9787028271045806	chr13	24137439	24175197	37759	-	ENSMUSG00000021337.9	protein_coding	KI.vs.WT	yes
ENSMUSG00000120671	-1496236097995610	0.053894802237241655	0.005607837807177544	0.14208700172030805	chr7	110722019	110723208	1190	+	ENSMUSG00000120671.1	lncRNA	KI.vs.WT	yes
2810029C07Rik	-1.25889e+16	0.053894802237241655	0.005607957000460277	0.7560864885590811	chr12	111538750	111540882	2133	-	ENSMUSG00000096995.4	lncRNA	KI.vs.WT	yes
ENSMUSG00000121444	2.07806e+16	0.053894802237241655	0.0056084389901496536	-0.008145095691467007	chr9	122511807	122512706	900	+	ENSMUSG00000121444.1	lncRNA	KI.vs.WT	yes
Pnma8a	0.836072144642434	0.053894802237241655	0.005610295009422562	2.59324e+16	chr7	16693604	16698532	4929	+	ENSMUSG00000041141.8	protein_coding	KI.vs.WT	yes
Nat8l	0.5614295605548585	0.053894802237241655	0.005613034896681334	4.95024e+16	chr5	34153328	34163260	9933	+	ENSMUSG00000048142.10	protein_coding	KI.vs.WT	yes
Tada3	-0.3580659076831256	0.05391718989386982	0.005618388789949776	4.40248e+16	chr6	113342986	113354844	11859	-	ENSMUSG00000048930.13	protein_coding	KI.vs.WT	no
Sap30	-0.685946615745487	0.05393676798882607	0.005623452267893301	4512340053666500	chr8	57935741	57940894	5154	-	ENSMUSG00000031609.4	protein_coding	KI.vs.WT	yes
Plek	-0.4954752488980509	0.0539601257724916	0.005628912223240295	9663308759838470	chr11	16921206	17002381	81176	-	ENSMUSG00000020120.16	protein_coding	KI.vs.WT	no
Abhd18	0.8662249122163129	0.05408172373798784	0.00564462834081465	2.39833e+16	chr3	40801405	40892573	91169	+	ENSMUSG00000037818.17	protein_coding	KI.vs.WT	yes
Zswim7	-1.25209e+16	0.05413179927831218	0.005652889128671278	1.1584e+16	chr11	62158050	62172201	14152	-	ENSMUSG00000014243.6	protein_coding	KI.vs.WT	yes
Gm43581	-1.73594e+16	0.054391544512755914	0.0056830627226332414	0.442125361933192	chr3	104550310	104553173	2864	+	ENSMUSG00000105199.2	lncRNA	KI.vs.WT	yes
Ppp2r2d	-0.2984766921060271	0.05440922160356763	0.005687959545440226	4713893122169510	chr7	138447808	138484786	36979	+	ENSMUSG00000041769.14	protein_coding	KI.vs.WT	no
Plekhh1	1.01265e+16	0.054450443166446816	0.005695321017297633	2.31105e+16	chr12	79075937	79128429	52493	+	ENSMUSG00000060716.8	protein_coding	KI.vs.WT	yes
Dock3	1.07602e+16	0.05451046075277716	0.005706535655893879	6034242881552830	chr9	106770024	107109108	339085	-	ENSMUSG00000039716.13	protein_coding	KI.vs.WT	yes
Chsy3	1.16164e+16	0.05451046075277716	0.005711572633826614	4278956951651010	chr18	59308473	59669071	360599	+	ENSMUSG00000058152.9	protein_coding	KI.vs.WT	yes
9530056K15Rik	-2.06272e+16	0.05451046075277716	0.005711947461177445	-0.5024017257220813	chr5	143379444	143385318	5875	-	ENSMUSG00000045345.8	lncRNA	KI.vs.WT	yes
Dlg4	0.40887587502324896	0.05451046075277716	0.005713820717920027	6225543473569290	chr11	69907768	69938348	30581	+	ENSMUSG00000020886.18	protein_coding	KI.vs.WT	no
Epc1	-0.32732507101161135	0.054550608733230255	0.005721086823983958	6023110553694830	chr18	6435951	6516108	80158	-	ENSMUSG00000024240.14	protein_coding	KI.vs.WT	no
Orai2	-0.47012561905844896	0.054641210526982134	0.0057336516875846726	5.13797e+16	chr5	136176313	136199567	23255	-	ENSMUSG00000039747.12	protein_coding	KI.vs.WT	no
Dnajc6	0.5087844051709084	0.05465621941864465	0.00573829030107183	3686775833866950	chr4	101353828	101499996	146169	+	ENSMUSG00000028528.18	protein_coding	KI.vs.WT	yes
Casp1	-0.5272684439339348	0.05476677941832513	0.005752967748315095	4386010890186610	chr9	5298508	5307290	8783	+	ENSMUSG00000025888.7	protein_coding	KI.vs.WT	yes
Gm44801	2120808419775930	0.05478279038305946	0.0057577204018069775	1.99719e+16	chr8	9653823	9655882	2060	-	ENSMUSG00000109529.2	TEC	KI.vs.WT	yes
Lemd3	-0.2978021820322079	0.05479661392664209	0.005762244827711915	5372552173587550	chr10	120759318	120815237	55920	-	ENSMUSG00000048661.15	protein_coding	KI.vs.WT	no
4933424G06Rik	-1.8666e+16	0.05485303341658933	0.005771252450837341	-0.43349683954394874	chr1	36749230	36797034	47805	+	ENSMUSG00000102416.5	protein_coding	KI.vs.WT	yes
Gm38260	2201257032230230	0.054896837783507124	0.0057789384168960975	-0.11031674427726854	chr1	25711326	25715320	3995	-	ENSMUSG00000102250.2	TEC	KI.vs.WT	yes
Syt11	0.4923157397886019	0.0549224178069257	0.005784709812736177	5249707773885740	chr3	88652007	88682471	30465	-	ENSMUSG00000068923.15	protein_coding	KI.vs.WT	no
Gm48786	1246332575751940	0.054978957138572856	0.005796828355060144	0.725671157083912	chr10	51419131	51422944	3814	+	ENSMUSG00000112226.2	processed_pseudogene	KI.vs.WT	yes
Gm44437	2368035940827490	0.054978957138572856	0.005797601208284254	0.4184143917125806	chr6	77722728	77726765	4038	-	ENSMUSG00000108102.2	TEC	KI.vs.WT	yes
Gm44822	1.51909e+16	0.054978957138572856	0.0058006651500348075	0.36432050138762256	chr7	49463950	49470338	6389	+	ENSMUSG00000109154.2	TEC	KI.vs.WT	yes
Cacna1e	1.07921e+16	0.054978957138572856	0.005803842145932548	6904046840347690	chr1	154266477	154760247	493771	-	ENSMUSG00000004110.18	protein_coding	KI.vs.WT	yes
Hnrnpa3	-0.2779183878899677	0.054978957138572856	0.005806073724723725	7802512566256710	chr2	75489605	75499751	10147	+	ENSMUSG00000059005.14	protein_coding	KI.vs.WT	no
Rmst	2.24084e+16	0.05520169684835194	0.005832690502194137	0.28917432735204335	chr10	91906899	92001132	94234	-	ENSMUSG00000112117.4	lncRNA	KI.vs.WT	yes
Numa1	-0.22987908396168108	0.055377182674920526	0.005854960661220319	8883003533170510	chr7	101583318	101664171	80854	+	ENSMUSG00000066306.14	protein_coding	KI.vs.WT	no
Gm49555	2.78946e+16	0.055377182674920526	0.0058590837588476715	-0.5411162563777924	chr16	81087050	81089844	2795	+	ENSMUSG00000116735.2	TEC	KI.vs.WT	yes
Gm44510	2.21458e+16	0.055377182674920526	0.005864603283180926	0.28931194261798715	chr7	55662696	55667227	4532	-	ENSMUSG00000108443.2	TEC	KI.vs.WT	yes
Kcnv1	1857563300229460	0.055377182674920526	0.0058685788861445355	0.3769078371189032	chr15	44969680	44978316	8637	-	ENSMUSG00000022342.7	protein_coding	KI.vs.WT	yes
Gm48086	1.36204e+16	0.055377182674920526	0.005872863953891996	0.4869469561247159	chr10	61282681	61286496	3816	-	ENSMUSG00000112229.2	lncRNA	KI.vs.WT	yes
Hk2	-0.2586721604701309	0.055377182674920526	0.0058739287372930726	8578545117285750	chr6	82702006	82751435	49430	-	ENSMUSG00000000628.11	protein_coding	KI.vs.WT	no
Gm44702	-1.64717e+16	0.055377182674920526	0.005877585505616786	-0.1316904540893588	chr7	28508729	28509922	1194	-	ENSMUSG00000109420.2	lncRNA	KI.vs.WT	yes
Cdh10	1024229705651360	0.055377182674920526	0.005879568241703163	259115717622209	chr15	18819033	19014322	195290	+	ENSMUSG00000022321.16	protein_coding	KI.vs.WT	yes
Rnu1a1	-0.9239322698122497	0.055377182674920526	0.005881633011000627	2.36359e+16	chr11	87313693	87313856	164	+	ENSMUSG00000119476.1	snRNA	KI.vs.WT	yes
Cttnbp2	1.0414e+16	0.055377182674920526	0.005882273608126368	6202583054597800	chr6	18366477	18514842	148366	-	ENSMUSG00000000416.17	protein_coding	KI.vs.WT	yes
4930537H20Rik	-1568044111347230	0.05555552064759009	0.005904331118151951	0.14501688015077124	chr3	90198792	90201290	2499	-	ENSMUSG00000105350.3	lncRNA	KI.vs.WT	yes
Dzip1	1.03563e+16	0.055567359647403204	0.005908704106004701	4555742125199730	chr14	119112932	119162872	49941	-	ENSMUSG00000042156.17	protein_coding	KI.vs.WT	yes
Gm37498	-1.64914e+16	0.055725493412082314	0.005928642740814586	-0.1669727697307921	chr3	50354731	50358732	4002	-	ENSMUSG00000103907.2	TEC	KI.vs.WT	yes
Erbb4	0.8639654781037021	0.05572825028387919	0.005934778660878557	3491256157773080	chr1	68071345	69147218	1075874	-	ENSMUSG00000062209.16	protein_coding	KI.vs.WT	yes
Smim7	-0.3356638305882935	0.05572825028387919	0.005935183606466954	4749975712937780	chr8	73319032	73324932	5901	-	ENSMUSG00000044600.15	protein_coding	KI.vs.WT	no
Gm38228	1622952889076780	0.055774590628265154	0.005943245335444622	-0.46247295906383906	chr1	43599433	43600725	1293	+	ENSMUSG00000103945.2	TEC	KI.vs.WT	yes
Gm42607	1.8314e+16	0.05578419633904321	0.005947395820451804	1.18113e+16	chr3	55391209	55394601	3393	+	ENSMUSG00000106354.2	TEC	KI.vs.WT	yes
Fem1b	0.32823280524983517	0.0558698718760665	0.005959661781398798	5538393519312440	chr9	62699103	62719216	20114	-	ENSMUSG00000032244.10	protein_coding	KI.vs.WT	no
Dido1	0.2419856930995835	0.05591490566227014	0.005967599797139145	7182715929399410	chr2	180299757	180351792	52036	-	ENSMUSG00000038914.16	protein_coding	KI.vs.WT	no
ENSMUSG00000120576	1.48254e+16	0.05597952746153437	0.005977634518734471	-0.12639151846681135	chr3	87282871	87285135	2265	-	ENSMUSG00000120576.1	lncRNA	KI.vs.WT	yes
Cnp	0.35964602711829463	0.056023985043009886	0.00598946801351309	5.76402e+16	chr11	100465730	100482555	16826	+	ENSMUSG00000006782.17	protein_coding	KI.vs.WT	no
C920006O11Rik	-1.56934e+16	0.056023985043009886	0.00599103533768589	0.276459467331916	chr9	78083165	78086164	3000	+	ENSMUSG00000121490.1	lncRNA	KI.vs.WT	yes
Gipr	1.46751e+16	0.056023985043009886	0.005991802884644779	1185930362080020	chr7	18889986	18900052	10067	-	ENSMUSG00000030406.8	protein_coding	KI.vs.WT	yes
2900027M19Rik	1703558808922030	0.056028046770404925	0.005995377874703083	3.01025e+16	chr8	9735829	9740276	4448	-	ENSMUSG00000109162.2	TEC	KI.vs.WT	yes
Gm38120	1.24642e+16	0.05604614980858039	0.006000456621882766	1.67218e+16	chr1	13413787	13418428	4642	-	ENSMUSG00000103085.2	TEC	KI.vs.WT	yes
Lrfn5	1.646e+16	0.05607269211253601	0.006006441402861901	2.53667e+16	chr12	61569936	61905128	335193	+	ENSMUSG00000035653.17	protein_coding	KI.vs.WT	yes
Cfap97d2	1.44556e+16	0.05609095122492756	0.006013384921230623	0.23785108557315224	chr8	13755889	13793414	37526	+	ENSMUSG00000090336.6	protein_coding	KI.vs.WT	yes
Elapor1	1158246784747610	0.05609095122492756	0.006014685520924127	2.15538e+16	chr3	108363010	108443852	80843	-	ENSMUSG00000040412.18	protein_coding	KI.vs.WT	yes
Gm38014	1.62667e+16	0.0561404842545708	0.006023143882469087	-0.39924544266151873	chr2	12394683	12397294	2612	-	ENSMUSG00000104406.2	TEC	KI.vs.WT	yes
Robo3	2.08935e+16	0.05619634912849869	0.006032287476517656	0.07285103067171984	chr9	37326965	37344542	17578	-	ENSMUSG00000032128.16	protein_coding	KI.vs.WT	yes
Sipa1l1	0.5353877276726863	0.05638239635053143	0.0060554188008754605	7957601440127400	chr12	82216094	82498560	282467	+	ENSMUSG00000042700.17	protein_coding	KI.vs.WT	yes
Gm48692	1.9204e+16	0.05644000838883909	0.006064769959719985	2190409855273270	chr12	89622493	89624871	2379	+	ENSMUSG00000114153.2	TEC	KI.vs.WT	yes
Gm49871	1.72519e+16	0.0564632144964972	0.006074143502297683	-0.3609005783666748	chr17	66193415	66196030	2616	+	ENSMUSG00000117250.2	lncRNA	KI.vs.WT	yes
Gm12743	1796543069636920	0.0564632144964972	0.00607466884380082	-0.42759369671065695	chr4	108449622	108477046	27425	-	ENSMUSG00000084968.2	lncRNA	KI.vs.WT	yes
Hexim2	-1184787062566310	0.0564632144964972	0.006077458616677823	1947914114063890	chr11	103023255	103030702	7448	+	ENSMUSG00000043372.13	protein_coding	KI.vs.WT	yes
Adap2	-0.2739610309495377	0.0564632144964972	0.006079923489224839	7946303694137000	chr11	80044931	80069784	24854	+	ENSMUSG00000020709.16	protein_coding	KI.vs.WT	no
Gm45477	1.13125e+16	0.05652589640621587	0.006089841529862495	1.08737e+16	chr3	90218825	90224322	5498	+	ENSMUSG00000108394.2	TEC	KI.vs.WT	yes
Gm43372	-1.96466e+16	0.05687055849043392	0.006132277154081246	-0.0618326822442138	chr5	135035947	135038962	3016	-	ENSMUSG00000107335.2	TEC	KI.vs.WT	yes
Pabpc4	-0.36380845854596594	0.05687055849043392	0.0061333494694840165	5308689104764870	chr4	123156144	123192718	36575	+	ENSMUSG00000011257.20	protein_coding	KI.vs.WT	no
Ndufaf3	-0.6001796335507348	0.056986399551404034	0.00615263730620925	2.82e+16	chr9	108442736	108444633	1898	-	ENSMUSG00000070283.5	protein_coding	KI.vs.WT	yes
Pcdhb16	1.21678e+16	0.056986399551404034	0.0061534204310197994	1719409088664870	chr18	37610867	37616091	5225	+	ENSMUSG00000047910.7	protein_coding	KI.vs.WT	yes
Pkib	-0.542219638914647	0.056986399551404034	0.0061554255569257615	4043364906016240	chr10	57508077	57617208	109132	+	ENSMUSG00000019876.16	protein_coding	KI.vs.WT	yes
Gm13656	-2457695654830600	0.057008268378740456	0.006160983264249529	0.07540199690153755	chr2	75559936	75560516	581	-	ENSMUSG00000087527.2	lncRNA	KI.vs.WT	yes
Cisd2	-0.306530935278522	0.057074418289160565	0.006173782888706035	5188823563770520	chr3	135112173	135129686	17514	-	ENSMUSG00000028165.10	protein_coding	KI.vs.WT	no
1700125G22Rik	-2.36019e+16	0.057074418289160565	0.006174530678143491	0.39589597466821924	chr3	27208175	27211168	2994	+	ENSMUSG00000097584.3	lncRNA	KI.vs.WT	yes
Prrg1	1.21185e+16	0.05729693134340077	0.006201814709871462	0.6046031235375072	chrX	77493219	77627502	134284	-	ENSMUSG00000047996.17	protein_coding	KI.vs.WT	yes
Zfp397	0.30536981080105113	0.05731736492825918	0.006207239296042418	4999785335115960	chr18	24087749	24097730	9982	+	ENSMUSG00000024276.8	protein_coding	KI.vs.WT	no
Prr14	-0.3246819164361964	0.05732728567059574	0.006212935682799213	4834320337366120	chr7	127058783	127075931	17149	+	ENSMUSG00000030822.16	protein_coding	KI.vs.WT	no
2700078F05Rik	2.49968e+16	0.05732728567059574	0.0062147404981464215	-0.1651957398740943	chr1	181777697	181780940	3244	-	ENSMUSG00000103722.2	TEC	KI.vs.WT	yes
Zmat4	1.12228e+16	0.05739732204105501	0.006225550344699632	2.95794e+16	chr8	24126035	24646601	520567	+	ENSMUSG00000037492.17	protein_coding	KI.vs.WT	yes
Stox2	0.7682539023164912	0.057397819150589634	0.006228821629794929	5637639525756700	chr8	47633083	47899397	266315	-	ENSMUSG00000038143.17	protein_coding	KI.vs.WT	yes
Ephx3	2.08686e+16	0.05743527023748907	0.006237361439697866	-0.2894002345843424	chr17	32402744	32408523	5780	-	ENSMUSG00000037577.14	protein_coding	KI.vs.WT	yes
Kcna6	0.8931124167899978	0.05743527023748907	0.006239324760103913	1440497983544300	chr6	126685292	126717637	32346	-	ENSMUSG00000038077.8	protein_coding	KI.vs.WT	yes
Nt5e	1.32503e+16	0.05764827892360723	0.0062675069356408425	1.48454e+16	chr9	88209250	88254145	44896	+	ENSMUSG00000032420.9	protein_coding	KI.vs.WT	yes
Plaur	-1.08913e+16	0.05764827892360723	0.00626892719236536	3544390611701110	chr7	24161909	24175393	13485	+	ENSMUSG00000046223.11	protein_coding	KI.vs.WT	yes
Cap2	0.8753507530437025	0.05767648234879513	0.00627522714344234	3.0062e+16	chr13	46655324	46803757	148434	+	ENSMUSG00000021373.17	protein_coding	KI.vs.WT	yes
Hs1bp3	-0.2917794365045936	0.05768620485030667	0.006279518487628675	4724168939286240	chr12	8363432	8393824	30393	+	ENSMUSG00000020605.10	protein_coding	KI.vs.WT	no
Plcb2	-0.36004117654085255	0.057740441662340075	0.006288659089121455	6.52529e+16	chr2	118537998	118558919	20922	-	ENSMUSG00000040061.18	protein_coding	KI.vs.WT	no
Greb1l	1606291127543420	0.05782589256695725	0.006307273202313811	0.28257558266057964	chr18	10325177	10562940	237764	+	ENSMUSG00000042942.19	protein_coding	KI.vs.WT	yes
Gm47112	-1.44725e+16	0.05782589256695725	0.006307839367753356	0.690320224258065	chr9	121686746	121688275	1530	+	ENSMUSG00000111079.2	lncRNA	KI.vs.WT	yes
Mzf1	122348225869737	0.05782589256695725	0.006310679859896509	2.11011e+16	chr7	12776230	12788691	12462	-	ENSMUSG00000030380.18	protein_coding	KI.vs.WT	yes
Tfip11	-0.26049019703704385	0.05782589256695725	0.006312020954567087	5474486376963340	chr5	112474224	112485939	11716	+	ENSMUSG00000029345.14	protein_coding	KI.vs.WT	no
Akap6	0.7307570680785836	0.05782589256695725	0.006314172574015287	5.43382e+16	chr12	52746166	53202382	456217	+	ENSMUSG00000061603.9	protein_coding	KI.vs.WT	yes
Med11	-0.3929546783805736	0.05791631836301374	0.006327432595178823	3.56718e+16	chr11	70342745	70344553	1809	+	ENSMUSG00000018923.14	protein_coding	KI.vs.WT	no
Glrp1	-0.98162632396764	0.05791631836301374	0.0063305392829527355	1.94556e+16	chr1	88427593	88437788	10196	-	ENSMUSG00000062310.8	protein_coding	KI.vs.WT	yes
Tmem19	0.3546755379290771	0.057930339938593235	0.006335319126692568	4304751562413150	chr10	115175579	115198406	22828	-	ENSMUSG00000069520.7	protein_coding	KI.vs.WT	no
Ftx	0.9284314752378596	0.05820353225565511	0.006368458237838497	4095695145605370	chrX	102604513	102667396	62884	-	ENSMUSG00000086370.11	lncRNA	KI.vs.WT	yes
Slc2a1	-0.5581105761788673	0.05823028065235083	0.006374648997423832	5406452568886400	chr4	118965908	118995180	29273	+	ENSMUSG00000028645.12	protein_coding	KI.vs.WT	yes
Akap10	-0.2768794737344756	0.05829491880886532	0.006384992788818545	547482017467632	chr11	61762133	61821078	58946	-	ENSMUSG00000047804.16	protein_coding	KI.vs.WT	no
Lrrc47	-0.3653637073028383	0.05838877109315459	0.006398545262730785	5108777827526420	chr4	154096188	154105970	9783	+	ENSMUSG00000029028.15	protein_coding	KI.vs.WT	no
Gm7276	213804069831106	0.05853666778562358	0.006424213738553288	-0.6554788049410452	chr18	77271965	77274059	2095	-	ENSMUSG00000073532.4	lncRNA	KI.vs.WT	yes
Epha10	1.03576e+16	0.05853666778562358	0.006426657912017558	4092973854054170	chr4	124774692	124811593	36902	+	ENSMUSG00000028876.8	protein_coding	KI.vs.WT	yes
Gm22883	2.30895e+16	0.05853666778562358	0.006427385396201903	-0.53729685609129	chr11	87209520	87209625	106	-	ENSMUSG00000088001.3	snRNA	KI.vs.WT	yes
Ralyl	1.0168e+16	0.05853666778562358	0.006431251363467209	1.53091e+16	chr3	13536715	14247347	710633	+	ENSMUSG00000039717.17	protein_coding	KI.vs.WT	yes
Sh3gl2	0.6055343043091287	0.05853666778562358	0.006431902944648135	3.81031e+16	chr4	85123363	85557432	434070	+	ENSMUSG00000028488.16	protein_coding	KI.vs.WT	yes
Lrfn3	1.11156e+16	0.05853666778562358	0.006434439771726897	1739646434100250	chr7	30054914	30062197	7284	-	ENSMUSG00000036957.9	protein_coding	KI.vs.WT	yes
Tubb2a	-0.3913779459779565	0.058550302861881655	0.006439220527747299	5070093975957530	chr13	34258257	34261990	3734	-	ENSMUSG00000058672.8	protein_coding	KI.vs.WT	no
Gm43258	1.59574e+16	0.0585866340183048	0.006446500144502933	-0.0750760342297221	chr3	104057072	104059021	1950	-	ENSMUSG00000105846.2	lncRNA	KI.vs.WT	yes
Gmfg	-0.3123593027735238	0.05864247137626342	0.006455931265862183	5308470306469920	chr7	28136872	28147658	10787	+	ENSMUSG00000060791.16	protein_coding	KI.vs.WT	no
A930017M01Rik	1572044766009520	0.05868229417880552	0.00646360471195924	0.6135375688019736	chr15	44615676	44748137	132462	+	ENSMUSG00000060530.4	transcribed_processed_pseudogene	KI.vs.WT	yes
Nedd4	0.4983185302360188	0.05874189875671581	0.0064734626096246235	5517992550527280	chr9	72569628	72657134	87507	+	ENSMUSG00000032216.16	protein_coding	KI.vs.WT	no
Ets2	-0.7096934111473148	0.058817396500246345	0.0064850795356493594	5209272148007480	chr16	95502942	95522095	19154	+	ENSMUSG00000022895.17	protein_coding	KI.vs.WT	yes
Gm42584	1.85701e+16	0.058850873183298034	0.006492069418426599	-0.09000671896974274	chr6	21491660	21491879	220	+	ENSMUSG00000107097.2	processed_pseudogene	KI.vs.WT	yes
Gm47705	-1.91678e+16	0.05887742687160357	0.006498616543309942	-0.7399646054222394	chr12	25231767	25239629	7863	+	ENSMUSG00000114033.2	lncRNA	KI.vs.WT	yes
Sstr3	1.11428e+16	0.05887742687160357	0.006501599267772368	1.97331e+16	chr15	78421208	78428885	7678	-	ENSMUSG00000044933.4	protein_coding	KI.vs.WT	yes
Atp1b1	0.7868916173325741	0.05888441748738094	0.006505671909620394	6900567444339880	chr1	164264678	164285924	21247	-	ENSMUSG00000026576.13	protein_coding	KI.vs.WT	yes
Mctp1	0.2799650326019214	0.05888502996076022	0.006511109548041545	5836326872443450	chr13	76532259	77179929	647671	+	ENSMUSG00000021596.18	protein_coding	KI.vs.WT	no
Eif4e2	-0.23594625202418693	0.05888502996076022	0.006512816563351245	5966915190925230	chr1	87141636	87168210	26575	+	ENSMUSG00000026254.18	protein_coding	KI.vs.WT	no
Fam234b	0.3338859369491814	0.05888502996076022	0.006517183404910651	5274634713021720	chr6	135174975	135221953	46979	+	ENSMUSG00000030207.16	protein_coding	KI.vs.WT	no
Ccl9	-0.4260030504238713	0.05888502996076022	0.006518942498458601	6229213423526410	chr11	83463745	83469462	5718	-	ENSMUSG00000019122.9	protein_coding	KI.vs.WT	no
Hk1	0.25805738788509147	0.05900889219864659	0.006536503051943893	5805473105584870	chr10	62104634	62215687	111054	-	ENSMUSG00000037012.19	protein_coding	KI.vs.WT	no
Tex30	-1.14429e+16	0.05900889219864659	0.006541034320700823	1.74124e+16	chr1	44125773	44141601	15829	-	ENSMUSG00000026049.12	protein_coding	KI.vs.WT	yes
Pxn	-0.27753887674222394	0.05900889219864659	0.006542577845791646	7057462062624080	chr5	115644735	115694046	49312	+	ENSMUSG00000029528.20	protein_coding	KI.vs.WT	no
Mirg	1.487e+16	0.059059541519372226	0.006551504073253231	3.13704e+16	chr12	109696198	109715894	19697	+	ENSMUSG00000097391.9	lncRNA	KI.vs.WT	yes
Fam120c	0.2759593772370017	0.05918121636202329	0.006568318856323212	47679481464361	chrX	150127171	150254838	127668	+	ENSMUSG00000025262.9	protein_coding	KI.vs.WT	no
Gm47558	2.18872e+16	0.059195292487423876	0.006573199238653963	-0.20887635977085506	chr13	114418204	114420917	2714	-	ENSMUSG00000114707.2	TEC	KI.vs.WT	yes
Usp2	-0.38730935331010735	0.05922712317860606	0.0065800537073989465	6367312461175080	chr9	43978318	44006924	28607	+	ENSMUSG00000032010.16	protein_coding	KI.vs.WT	no
2610028D06Rik	1365529893489880	0.05923203056912535	0.006583919092969482	0.5208742104425481	chr9	45708646	45710358	1713	-	ENSMUSG00000110997.2	TEC	KI.vs.WT	yes
Arid5a	-0.6462733035681376	0.05939489341486577	0.00660535137528552	5286982541055060	chr1	36346814	36363110	16297	+	ENSMUSG00000037447.17	protein_coding	KI.vs.WT	yes
St7	0.6689150567709856	0.059402063222618595	0.006609478447135533	3131534805949530	chr6	17692932	17943024	250093	+	ENSMUSG00000029534.18	protein_coding	KI.vs.WT	yes
Hlx	-0.437238244565274	0.05943750538945674	0.006619737364261111	5386437772277960	chr1	184459337	184464816	5480	-	ENSMUSG00000039377.8	protein_coding	KI.vs.WT	no
Snord13	-0.7670108545182818	0.05943750538945674	0.006620085381662025	2.49274e+16	chr8	31639892	31639995	104	-	ENSMUSG00000088252.3	snoRNA	KI.vs.WT	yes
Apbb1	0.5635513427329634	0.05957628284428577	0.006638881742961889	3.76371e+16	chr7	105207690	105230860	23171	-	ENSMUSG00000037032.17	protein_coding	KI.vs.WT	yes
Pde4d	0.6641449456283601	0.059577708111241516	0.0066423801251827	4507510473317850	chr13	108586482	110089995	1503514	+	ENSMUSG00000021699.18	protein_coding	KI.vs.WT	yes
Micu1	0.2873451002269615	0.059605748517095276	0.0066519571609708825	5603247057308460	chr10	59538299	59699954	161656	+	ENSMUSG00000020111.16	protein_coding	KI.vs.WT	no
Tmem158	1124392579149910	0.059605748517095276	0.006653287749733422	0.38050600135034035	chr9	123088118	123089829	1712	-	ENSMUSG00000054871.6	protein_coding	KI.vs.WT	yes
Fam228a	1.88919e+16	0.059605748517095276	0.0066644539520607435	1.09893e+16	chr12	4763670	4788430	24761	-	ENSMUSG00000079177.5	protein_coding	KI.vs.WT	yes
Mrpl41	-0.6040056621144779	0.059605748517095276	0.006667880751904066	333219859929283	chr2	24864129	24865110	982	-	ENSMUSG00000036850.5	protein_coding	KI.vs.WT	yes
Cops7b	0.5652103913569103	0.059605748517095276	0.006668284532287782	3.19286e+16	chr1	86510626	86537097	26472	+	ENSMUSG00000026240.13	protein_coding	KI.vs.WT	yes
Cdk2	-0.5074948042431221	0.059605748517095276	0.006670198432142422	3398851000180260	chr10	128533808	128540900	7093	-	ENSMUSG00000025358.17	protein_coding	KI.vs.WT	yes
Ikzf4	1.26723e+16	0.059605748517095276	0.006672559551758677	1.5906e+16	chr10	128466712	128505227	38516	-	ENSMUSG00000002578.19	protein_coding	KI.vs.WT	yes
D630045J12Rik	0.6185577435319936	0.059605748517095276	0.0066740577182897234	4.09073e+16	chr6	38100109	38230944	130836	-	ENSMUSG00000063455.17	protein_coding	KI.vs.WT	yes
A830082K12Rik	1.36223e+16	0.059605748517095276	0.006675576543562576	0.7453444800918226	chr13	78346136	78427510	81375	+	ENSMUSG00000087143.11	lncRNA	KI.vs.WT	yes
[truncated: 15,842 more rows]

## Sheet: Extended Data Table 1b
Extended Data Table 1b
Term	Overlap	P.value	Adjusted.P.value	Old.P.value	Old.Adjusted.P.value	Odds.Ratio	Combined.Score	Genes	direction	db
Chemical Synaptic Transmission (GO:0007268)	55/273	22.083	532201	0	0	3.80063e+16	1.19507e+16	GABRB3;CHRM2;SNAP25;GABRB1;CHRM1;DOC2A;GRIK2;GRM2;GRM7;DLGAP1;ERC2;DLGAP2;KCND2;SLC32A1;SYN3;GABRG3;SYN2;CACNB3;CACNB4;KCNQ2;KCNQ3;AMPH;NLGN3;GRIA2;NLGN1;KCNA1;CHRNA7;SLC1A1;CACNA1A;CACNA1E;GRIN2A;PENK;ASIC2;GRIA3;GRIA4;GABRA2;GABBR2;PTPRN2;SYT1;GABRA5;GABRA4;GAD1;GAD2;GRIN2B;PCDHB10;DLG2;PCDHB2;TH;GLRB;SYT10;PCDHB16;PLP1;PCDHB3;PCDHB9;CBLN2	up	GO_Biological_Process_2023
Axonogenesis (GO:0007409)	40/188	131676	1.58669e+08	0	0	4037529081776860	1.01153e+16	CYFIP2;NLGN3;ROBO3;EPHA10;ATL1;LRTM2;PLPPR4;SEMA3B;SEMA3E;DPYSL5;SLITRK1;SLITRK4;SLITRK3;TNR;SLITRK5;NRCAM;APBB1;CTNNA2;EPHB2;EPHB1;LGI1;EPHA4;EPHA7;DSCAM;AUTS2;CNTN6;DCC;SEMA4F;ANK3;PTK2;ENAH;SHTN1;EFNA3;NFASC;FEZ1;MAP1B;MAP1A;DSCAML1;EPHA3;CDK5R1	up	GO_Biological_Process_2023
Anterograde Trans-Synaptic Signaling (GO:0098916)	41/199	215583	1.73185e+08	0	0	3.87757e+16	9523415048940730	GABRB3;CHRM2;NLGN3;GRIA2;SNAP25;GABRB1;NLGN1;CHRM1;DOC2A;KCNA1;SLC1A1;CACNA1A;GRIK2;CACNA1E;GRM2;GRIN2A;GRM7;PENK;DLGAP1;ASIC2;GABBR2;KCND2;SYT1;GAD1;GAD2;GRIN2B;SYN2;PCDHB10;CACNB3;CACNB4;DLG2;PCDHB2;GLRB;SYT10;KCNQ2;PCDHB16;KCNQ3;PLP1;AMPH;PCDHB3;PCDHB9	up	GO_Biological_Process_2023
Modulation Of Chemical Synaptic Transmission (GO:0050804)	28/123	3.08802e+07	1.86053e+10	0	0	4373378066680640	8569955660497980	NLGN3;GRIA2;NLGN1;CLSTN2;CHRNA7;PLPPR4;CAMK2A;LRRC4;CACNA1A;GRIK2;LRP8;SLC8A2;RIMS2;GRM2;GRM5;RIMS3;GRM7;DLGAP1;DLGAP2;GRIA3;GRIA4;CACNG5;LGI1;CDKL5;SYT1;SYN3;NPAS4;NPTXR	up	GO_Biological_Process_2023
Positive Regulation Of Synaptic Transmission (GO:0050806)	20/77	5.24104e+08	2.33844e+11	0	0	5183981330999700	8690509688678260	NLGN3;LGI1;NLGN1;CLSTN2;SYT1;CHRNA7;GRIK2;NALCN;PRKCZ;GRIN2B;SHISA7;SLC8A2;RIMS2;STX1B;GRIN2A;RIMS3;EPHB2;CACNG2;CACNG3;CACNG5	up	GO_Biological_Process_2023
Neuron Projection Guidance (GO:0097485)	26/124	6.72861e+07	2.33844e+11	0	0	3.92978e+16	6489762820720110	CYFIP2;ROBO3;EPHA10;LRTM2;SEMA3B;SEMA3E;DPYSL5;TNR;NRCAM;EPHB2;EPHB1;LGI1;EPHA4;EPHA7;DSCAM;CNTN6;DCC;SEMA4F;PTK2;ENAH;EFNA3;NFASC;FEZ1;DSCAML1;EPHA3;CDK5R1	up	GO_Biological_Process_2023
Axon Guidance (GO:0007411)	29/149	6.79216e+07	2.33844e+11	0	0	3583951355661880	5915279875553850	CYFIP2;ROBO3;EPHA10;LRTM2;SEMA3B;SEMA3E;DPYSL5;TNR;NRCAM;PLXNC1;EPHB2;EPHB1;LGI1;EPHA4;EPHA7;DSCAM;UNC5A;UNC5B;CNTN6;DCC;SEMA4F;PTK2;ENAH;EFNA3;NFASC;FEZ1;DSCAML1;EPHA3;CDK5R1	up	GO_Biological_Process_2023
Nervous System Development (GO:0007399)	58/433	8.00293e+07	2.41088e+11	0	0	2315833469387750	3784274133600000	CHRM2;SH3GL3;CHRM1;DOC2A;MYT1L;RAPGEFL1;ROBO1;DPYSL5;DPF1;NRCAM;EPHB2;EPHB1;SH3GL2;RBFOX1;SRRM4;RBFOX2;DSCAM;SOX11;DNM3;ALDH5A1;FEZ1;SCN8A;KCNQ2;TYRO3;DCX;DSCAML1;HDAC4;NLGN3;NLGN1;NUMBL;SHC3;DLX6;ADAM22;NPAS2;BRINP2;SNTG2;ACVR1C;SLITRK1;ERBB4;ASIC2;LGI1;MOG;CNTN6;SEMA4F;ZIC4;PCDHB10;DCLK1;AHI1;NFASC;PCDHB2;GLRB;PCDHB16;PCDHB3;MDGA2;SCN2A;PCDHB9;FGF12;ADGRL3	up	GO_Biological_Process_2023
Glutamate Receptor Signaling Pathway (GO:0007215)	13/35	1.14465e+09	3.06511e+09	0	0	8698460987831060	1.39027e+16	GRIA2;HOMER2;KCNB1;GRIK2;GRIN2B;GRM2;GRIN2A;GRM5;GRM7;PLCB1;GRIA3;GRIA4;CDK5R1	up	GO_Biological_Process_2023
Synapse Organization (GO:0050808)	26/131	2.13629e+09	5.14846e+10	0	0	3666416638254340	563125870267803	NLGN3;NLGN1;CHRNA7;LRRC4;SEMA3E;CX3CL1;SLC8A2;GRM5;SLITRK1;SLITRK3;NRCAM;PPFIA2;DSCAM;ANK3;PCDHB10;DNM3;CACNB3;LRFN5;CACNB4;PCDHB2;PCDHB16;PCDHB3;MAPT;PCDHB9;CBLN2;ADGRL3	up	GO_Biological_Process_2023
Potassium Ion Transmembrane Transport (GO:0071805)	26/137	5.34382e+07	1.17078e+12	0	0	3.46711e+16	5007259791885460	KCNK9;KCNC2;KCNA1;ATP1A3;KCNA4;KCNA6;NALCN;KCNV1;SLC12A8;KCNJ3;KCNH3;KCNF1;KCNJ6;KCNH5;KCNK10;KCND2;KCNH7;KCNB1;KCNJ9;KCNB2;ATP1B1;KCNS2;KCNQ2;KCNQ3;KCNQ5;HCN1	up	GO_Biological_Process_2023
Potassium Ion Transport (GO:0006813)	24/122	7.33895e+08	1.47391e+12	0	0	3.62173e+16	5.11565e+16	KCNH3;KCNF1;KCNJ6;KCNH5;KCNK10;KCNK9;KCND2;KCNH7;KCNC2;KCNB1;KCNA1;KCNB2;KCNA4;KCNA6;KCNAB3;NALCN;KCNV1;KCNS2;KCNQ2;KCNMA1;KCNQ3;KCNQ5;KCNJ3;HCN1	up	GO_Biological_Process_2023
Axon Development (GO:0061564)	21/99	9.86311e+07	1.82847e+12	0	0	3976380592466170	5.49905e+16	DCC;AMIGO1;ATL1;PLPPR4;ANK3;SHTN1;GRM7;SLITRK1;MAP1B;SLITRK4;MAP1A;SLITRK3;PLP1;SLITRK5;NRCAM;MAPT;APBB1;CTNNA2;EPHB2;DSCAML1;CDK5R1	up	GO_Biological_Process_2023
Synapse Assembly (GO:0007416)	17/71	1.79556e+09	3.03567e+10	0	0	4640907495172890	6.14001e+16	GABRB3;NLGN3;GABRA2;NLGN1;DSCAM;LRRC4;PCDHB10;DNM3;NPAS4;PCDHB2;SLITRK1;PCDHB16;NRCAM;SRGAP3;PCDHB3;PCDHB9;ADGRL3	up	GO_Biological_Process_2023
Neuron Projection Morphogenesis (GO:0048812)	26/146	1.88942e+09	3.03567e+10	0	0	3.20553e+16	4224643161296420	NLGN1;ATL1;PLPPR4;MAP2;SLITRK1;SLITRK4;EPB41L3;SLITRK3;SLITRK5;NRCAM;SRGAP3;APBB1;CTNNA2;EPHB2;EPHB1;PACSIN1;EPHA4;DCC;ANK3;DCLK1;MYO16;SHTN1;MAP1B;MAP1A;TNIK;DSCAML1	up	GO_Biological_Process_2023
Positive Regulation Of Synapse Assembly (GO:0051965)	11994	2.66993e+09	4.02158e+12	0	0	7699011680143750	9880495211665100	NLGN3;NLGN1;CLSTN2;SLITRK1;SLITRK4;SLITRK3;IL1RAPL1;SLITRK5;EPHB2;EPHB1;VSTM5	up	GO_Biological_Process_2023
Metal Ion Transport (GO:0030001)	28/171	4.27588e+09	6.06169e+11	0	0	2.8979e+16	3582537390982790	KCNK9;CHRNA7;SLC41A2;KCNA1;CAMK2A;KCNA4;KCNA6;RYR3;KCNV1;NIPAL2;SCN3B;SCN3A;CACNG3;SCN1A;KCNJ3;KCNH3;KCNF1;KCNJ6;TRPC4;CACNA2D1;KCNB2;ATP2B2;KCNAB3;CACNB3;KCNS2;SCN8A;KCNMA1;SCN2A	up	GO_Biological_Process_2023
Cell-Cell Adhesion Via Plasma-Membrane Adhesion Molecules (GO:0098742)	28/172	4.80011e+10	6.42681e+11	0	0	2.87762e+16	3524188058280410	ROBO3;NLGN1;TENM3;TENM4;AMIGO1;AMIGO2;LRRC4;ROBO1;TRO;SLITRK1;SLITRK3;CADM3;CXADR;DSCAM;CADM2;CNTN6;PCDHB10;LRFN5;PCDHB2;CDH10;IL1RAPL1;PCDHB16;CDH12;PCDHB3;PCDHB9;DSCAML1;CDH18;ADGRL3	up	GO_Biological_Process_2023
Regulation Of Synapse Assembly (GO:0051963)	13/51	1.40864e+11	0.0016720408609705235	0	0	5031641110650640	5620494985226840	NLGN3;NLGN1;CLSTN2;LHFPL4;LRFN5;LRRTM3;SLITRK1;SLITRK4;IL1RAPL1;SLITRK3;SLITRK5;EPHB2;EPHB1	up	GO_Biological_Process_2023
Regulation Of Postsynapse Organization (GO:0099175)	45901	1.429e+09	0.0016720408609705235	0	0	8256917189952900	9211378839633570	EPHA4;SIPA1L1;CDKL5;IL1RAPL1;KIF1A;SRCIN1;PPFIA2;ZDHHC15;CDK5R1	up	GO_Biological_Process_2023
Modulation Of Excitatory Postsynaptic Potential (GO:0098815)	11597	1.45697e+11	0.0016720408609705235	0	0	699360341151386	7788475335010670	NLGN3;RIMS2;STX1B;NLGN1;GRIN2A;NETO1;CHRNA7;PRKCZ;GRIN2B;SLC8A2	up	GO_Biological_Process_2023
Calcium Ion Transmembrane Import Into Cytosol (GO:0097553)	17/83	1.69958e+10	0.0018464239055048634	0	0	3.79466e+16	4.16751e+16	CACNA2D1;ATP2B4;CACNA1A;NALF1;CACNA1E;GRIN2B;SLC8A2;JPH4;CACNA1I;CACNB3;GRIN2A;PLCB4;SCN8A;PLCB1;SCN2A;SCN3A;SCN1A	up	GO_Biological_Process_2023
Gamma-Aminobutyric Acid Signaling Pathway (GO:0007214)	44044	1.76215e+11	0.0018464239055048634	0	0	9780392156862740	1.0706e+16	GABRA2;GABRB3;GABBR2;GABRB1;GABRA5;GABRA4;GABRG3;SHISA7	up	GO_Biological_Process_2023
Cell Morphogenesis Involved In Neuron Differentiation (GO:0048667)	16/77	2.47254e+11	0.0024828379765749337	0	0	3.86218e+16	4096873231699090	DCC;ATL1;PLPPR4;ANK3;SHTN1;MAP2;SLITRK1;MAP1B;SLITRK4;MAP1A;SLITRK3;SLITRK5;NRCAM;APBB1;CTNNA2;DSCAML1	up	GO_Biological_Process_2023
Regulation Of Synaptic Transmission, Glutamatergic (GO:0051966)	13/55	3.37631e+10	0.003254759874968117	0	0	4.55146e+16	4686250678057470	NLGN3;NLGN1;SYT1;PLPPR4;GRIN2B;GRM2;GRM5;GRIN2A;GRM7;CACNG2;CACNG3;CACNG5;HCN1	up	GO_Biological_Process_2023
Regulation Of Dendrite Development (GO:0050773)	15281	3.82966e+11	0.003549801168573788	0	0	5386713836477980	5.47837e+16	CDKL5;BCL11A;DCC;HECW2;SEZ6;KNDC1;TNIK;LRP8;MARK1;PACSIN1;ZDHHC15	up	GO_Biological_Process_2023
Positive Regulation Of Excitatory Postsynaptic Potential (GO:2000463)	44774	3.98488e+10	0.0035568732223419035	0	0	8382296918767500	8491617652329540	NLGN3;RIMS2;STX1B;NLGN1;GRIN2A;NETO1;GRIN2B;PRKCZ	up	GO_Biological_Process_2023
Positive Regulation Of Nervous System Development (GO:0051962)	18233	4.62286e+10	0.0039756727236093595	0	0	4766623429093920	475800128870321	NLGN3;NLGN1;NUMBL;CLSTN2;SLITRK1;SLITRK4;IL1RAPL1;SLITRK3;SLITRK5;SOX11;EPHB2;EPHB1	up	GO_Biological_Process_2023
Regulation Of Neuron Projection Development (GO:0010975)	26/174	4.784e+10	0.0039756727236093595	0	0	2.59516e+16	2.58158e+16	NDRG4;NLGN1;TENM3;PLPPR5;SEZ6;KNDC1;CX3CL1;SIPA1L1;TNR;KIF1A;CTNNA2;PPFIA2;MARK1;EPHA4;CDKL5;DCC;MAGI2;SRCIN1;ZDHHC15;STX1B;CCDC88A;FRMD7;LRRC7;IL1RAPL1;EPHA3;CDK5R1	up	GO_Biological_Process_2023
Monoatomic Cation Transmembrane Transport (GO:0098655)	36/281	5.83275e+10	0.004684425966595893	0	0	2.17663e+16	2.12209e+16	KCNK9;KCNC2;KCNA1;SLC41A2;UCP1;KCNA4;CACNA1A;ATP1A3;ABCB8;KCNA6;NALCN;RYR3;SLC8A2;KCNV1;GRIN2A;SCN3B;ASIC2;KCNH3;KCNF1;KCNH5;KCNK10;KCND2;KCNB1;KCNH7;TRPC4;SLC6A15;KCNB2;ATP2B4;ATP1B1;GRIN2B;KCNS2;KCNQ2;KCNQ3;KCNQ5;SCN2A;HCN1	up	GO_Biological_Process_2023
Ephrin Receptor Signaling Pathway (GO:0048013)	16011	6.1929e+10	0.004684425966595893	0	0	504950373427673	4892727375221550	EPHA4;EPHA7;EFNA3;SIPA1L1;EPHA10;EPHB2;EPHB1;PTK2;EPHA3;ANKS1B;CDK5R1	up	GO_Biological_Process_2023
Regulation Of Trans-Synaptic Signaling (GO:0099177)	13424	6.21998e+10	0.004684425966595893	0	0	5647169013233420	5469372426045230	NLGN3;GRIA2;NLGN1;CDKL5;LRRC4;CACNA1A;GRIK2;LRP8;GRIA3;GRIA4	up	GO_Biological_Process_2023
Central Nervous System Development (GO:0007417)	36/283	6.76449e+10	0.004940128887171427	0	0	2.15877e+16	2.07268e+16	SH3GL3;NDRG4;SHC3;FOXG1;AMIGO1;AMIGO2;ADAM22;NPAS2;AFF2;GRIN2A;SNTG2;NRCAM;ASIC2;SH3GL2;EPHA7;MOG;CADM2;CNTN6;PBX3;SOX11;ZIC4;SOX12;PBX4;GRIN2B;MEIS2;DCLK1;PBX1;AHI1;MEIS1;NFASC;ALDH5A1;DCX;DSCAML1;CDK5R2;ADGRL3;CDK5R1	up	GO_Biological_Process_2023
Regulation Of Dendritic Spine Morphogenesis (GO:0061001)	11202	7.47381e+10	0.005297614161089398	0	0	6289302534200490	5975793519795840	EPHA4;NLGN1;SIPA1L1;KIF1A;LRP8;SRCIN1;PPFIA2;ZDHHC15;CDK5R1	up	GO_Biological_Process_2023
Calcium Ion Import Across Plasma Membrane (GO:0098703)	13789	8.037e+10	0.005534051946203461	0	0	5437723662389800	5127158393993100	CACNA1I;CACNA2D1;SCN8A;CACNA1A;SCN2A;CACNA1E;NALF1;SCN3A;SLC8A2;SCN1A	up	GO_Biological_Process_2023
Inorganic Cation Import Across Plasma Membrane (GO:0098659)	18/103	8.98583e+10	0.006015515095548889	0	0	3.11905e+16	2.90611e+16	KCNJ6;KCNK9;KCNJ9;CACNA2D1;ATP2B4;CACNA1A;ATP1A3;ATP1B1;NALF1;CACNA1E;SLC8A2;CACNA1I;SCN8A;SCN2A;SCN3A;SLC12A8;SCN1A;KCNJ3	up	GO_Biological_Process_2023
Synaptic Transmission, GABAergic (GO:0051932)	41791	1.32187e+11	0.008610006581905727	0	0	1.09881e+16	9813757943102610	GABRA2;GABRB3;GABBR2;GABRA5;GABRA4;GABRG3	up	GO_Biological_Process_2023
Inorganic Cation Transmembrane Transport (GO:0098662)	35/284	1.59673e+12	0.010126610878353443	0	0	2.08005e+16	1818460527495670	KCNK9;KCNC2;KCNA1;SLC41A2;UCP1;KCNA4;CACNA1A;ATP1A3;ABCB8;KCNA6;NALCN;RYR3;SLC8A2;KCNV1;SCN3B;ASIC2;KCNH3;KCNF1;KCNH5;KCNK10;KCND2;KCNB1;KCNH7;TRPC4;SLC6A15;KCNB2;ATP2B4;ATP1B1;KCNS2;KCNQ2;KCNQ3;KCNQ5;SCN2A;RHCG;HCN1	up	GO_Biological_Process_2023
Chloride Transmembrane Transport (GO:1902476)	17838	1.8099e+11	0.01111304670135818	0	0	4365969743328230	3762185173935030	GABRB3;GABRA2;GABRB1;GLRB;GABRA5;GABRA4;SLC1A1;ANO4;GABRG3;SLC12A8;ANO3	up	GO_Biological_Process_2023
Regulation Of Cation Channel Activity (GO:2001257)	20790	1.84449e+12	0.01111304670135818	0	0	4.00679e+16	3.4451e+16	JPH4;CACNB3;CACNB4;NETO1;KCNS2;PDE4D;CACNA1A;ANK2;NOS1;ANK3;FGF12;HCN1	up	GO_Biological_Process_2023
Regulation Of Neuronal Synaptic Plasticity (GO:0048168)	12663	2.17095e+12	0.012760936297069338	0	0	5281883830455250	445536228167582	GRIN2A;NETO1;CAMK2A;SLC4A10;GRIK2;EPHB2;GRIN2B;SHISA7;SLC8A2	up	GO_Biological_Process_2023
Memory (GO:0007613)	21520	2.61594e+12	0.014902125896141809	0	0	3832175965518420	316105407396	NPAS4;NETO1;TH;CHRNA7;CAMK4;RASGRF1;MAP1A;MAPT;PLCB1;SCN2A;SHISA7;SLC8A2	up	GO_Biological_Process_2023
Positive Regulation Of Developmental Growth (GO:0048639)	18568	2.65889e+12	0.014902125896141809	0	0	4.14163e+16	3409569591364140	GHR;RIMS2;SHTN1;SYT4;CDKL5;CPNE5;SYT1;MAPT;PLCB1;MAP3K13;SYT17	up	GO_Biological_Process_2023
Regulation Of Calcium Ion-Dependent Exocytosis (GO:0017158)	46966	2.74151e+12	0.015015981968332929	0	0	5865725490196070	4.81097e+16	SYT4;DOC2A;SYT1;KCNB1;SYT10;CBARP;SYT17;SYT6	up	GO_Biological_Process_2023
Neurotransmitter Secretion (GO:0007269)	15980	3.1113e+11	0.016662751755661762	0	0	444761836749268	3591584824963510	RIMS2;SNAP25;PCLO;PTPRN2;DOC2A;SLC32A1;SYT1;SYT10;SYN3;SYN2	up	GO_Biological_Process_2023
Positive Regulation Of Cell Communication (GO:0010647)	11171	4.60272e+11	0.02411426650028028	0	0	5331907308377890	4.09687e+16	RIMS2;LGI1;RIMS3;CLSTN2;SYT1;SOX11;GRIK2;ANK3	up	GO_Biological_Process_2023
Calcium-Dependent Cell-Cell Adhesion Via Plasma Membrane Cell Adhesion Molecules (GO:0016339)	14124	5.34959e+11	0.02702637846446384	0	0	4552373734639740	3429448788312700	NLGN1;PCDHB2;CDH10;PCDHB16;CDH12;PCDHB3;PCDHB10;PCDHB9;CDH18	up	GO_Biological_Process_2023
Monoatomic Anion Transmembrane Transport (GO:0098656)	20029	5.38285e+10	0.02702637846446384	0	0	3755557993271900	2.82685e+16	GABRB3;GABRA2;GABRB1;GLRB;GABRA5;GABRA4;SLC1A1;ANO4;GABRG3;SLC12A8;ANO3	up	GO_Biological_Process_2023
Axonal Fasciculation (GO:0007413)	45631	5.83374e+11	0.028692481657074415	0	0	1.04572e+16	7787134921398550	EPHA4;NRCAM;EPHB2;EPHA3;CDK5R1	up	GO_Biological_Process_2023
Regulation Of Nervous System Process (GO:0031644)	43252	6.54142e+11	0.030911433078260376	0	0	7323805794831630	5.36995e+16	CHRNA7;DLGAP1;NPTXR;DLGAP2;SLC8A2;CACNG5	up	GO_Biological_Process_2023
Positive Regulation Of Cation Transmembrane Transport (GO:1904064)	43252	6.54142e+11	0.030911433078260376	0	0	7323805794831630	5.36995e+16	AMIGO1;NOS1AP;AKAP6;ANK2;ANK3;NOS1	up	GO_Biological_Process_2023
Synaptic Vesicle Endocytosis (GO:0048488)	14855	7.99254e+11	0.03704233831869073	0	0	425821643793994	3.03689e+16	NLGN3;DNM3;SH3GL3;NLGN1;SYT1;DNAJC6;SH3GL2;SNAP91;PACSIN1	up	GO_Biological_Process_2023
Positive Regulation Of Calcium Ion-Dependent Exocytosis (GO:0045956)	45508	9.57276e+11	0.04352894651985236	0	0	1463096168881930	1.01706e+16	SYT4;SYT1;KCNB1;SYT10	up	GO_Biological_Process_2023
Calcium-Ion Regulated Exocytosis (GO:0017156)	46204	9.81297e+10	0.043794908285225476	0	0	5398696584721990	3739480448356300	RIMS2;SYT4;RIMS3;SYT1;SYT10;SYT17;SYT6	up	GO_Biological_Process_2023
Cell Junction Assembly (GO:0034329)	15/95	0.001020370573884325	0.044710783328385885	0	0	2.75587e+16	1.89813e+16	NLGN3;NLGN1;DSCAM;PCDHB10;DNM3;PCDHB2;SLITRK1;CDH10;PCDHB16;CDH12;NRCAM;PCDHB3;PCDHB9;CDH18;ADGRL3	up	GO_Biological_Process_2023
Regulation Of Neurotransmitter Receptor Activity (GO:0099601)	15585	0.0011610664276500528	0.04996732304708263	0	0	3.99971e+16	2.70317e+16	NLGN1;NETO1;DLGAP1;CACNG2;NPTXR;CACNG3;DLGAP2;SHISA7;CACNG5	up	GO_Biological_Process_2023
Neuron Projection Development (GO:0031175)	24/192	0.0013252757258474098	0.056033587706881716	0	0	2104731646431400	1.39462e+16	LGI1;EPHA4;NLGN1;UNC5A;RASGRF1;DCLK1;MYO16;SHTN1;ATCAY;GRM7;MAP2;GPRIN1;MAP1B;EPB41L3;PLP1;TNIK;SRGAP3;MAPT;EPHB2;EPHB1;SH3GL2;HDGFL3;PACSIN1;CDK5R1	up	GO_Biological_Process_2023
Regulation Of Postsynaptic Membrane Potential (GO:0060078)	12997	0.0013904168655714207	0.05715192645553702	0	0	4343355119825700	2.85712e+16	NLGN3;GABRA2;NPAS4;GRIN2A;GABRA5;GABRA4;GABRG3;GRIN2B	up	GO_Biological_Process_2023
Positive Regulation Of Cell Projection Organization (GO:0031346)	17/118	0.001399155046006923	0.05715192645553702	0	0	2475028545508570	1.62656e+16	CARMIL1;NDRG4;NLGN1;CDKL5;TENM3;AMIGO1;MAGI2;PLPPR5;CX3CL1;ROBO1;TIAM2;LRRC7;SLITRK1;IL1RAPL1;PLXNC1;MAP3K13;EPHA3	up	GO_Biological_Process_2023
Regulation Of Postsynaptic Neurotransmitter Receptor Activity (GO:0098962)	45539	0.0016357219138994376	0.06570149687496074	0	0	1.17041e+16	7508993676190910	DLGAP1;NPTXR;DLGAP2;CACNG5	up	GO_Biological_Process_2023
Inorganic Anion Transmembrane Transport (GO:0098661)	23316	0.002041788958586875	0.08066739983925195	0	0	3.10406e+16	192263321717591	GABRB3;GABRA2;GABRB1;GLRB;GABRA5;GABRA4;SLC1A1;ANO4;GABRG3;SLC12A8;ANO3	up	GO_Biological_Process_2023
Positive Regulation Of Synaptic Transmission, Glutamatergic (GO:0051968)	44713	0.0021072186474398688	0.08190962806984005	0	0	5491679718089270	338418522850159	NLGN3;NLGN1;GRIN2A;GRIN2B;CACNG3;CACNG5	up	GO_Biological_Process_2023
Neuron Migration (GO:0001764)	20363	0.0023577077299428272	0.08630069947208234	0	0	325949201361613	1972013996017960	CDKL5;AUTS2;DCC;MAP1B;DCX;NRCAM;SEMA3E;SEPTIN4;MARK1;CDK5R1	up	GO_Biological_Process_2023
Gamma-Aminobutyric Acid Metabolic Process (GO:0009448)	45415	0.002387652121400927	0.08630069947208234	0	0	21931640625	1.32411e+16	ALDH5A1;GAD1;GAD2	up	GO_Biological_Process_2023
Negative Regulation Of Neuron Migration (GO:2001223)	45415	0.002387652121400927	0.08630069947208234	0	0	21931640625	1.32411e+16	NEXMIF;SRGAP3;CX3CL1	up	GO_Biological_Process_2023
Neurotransmitter-Gated Ion Channel Clustering (GO:0072578)	45415	0.002387652121400927	0.08630069947208234	0	0	21931640625	1.32411e+16	NLGN1;LHFPL4;SHISA7	up	GO_Biological_Process_2023
Signal Release From Synapse (GO:0099643)	14093	0.0024350404830297094	0.08630069947208234	0	0	3908392156862740	2351989065230300	SNAP25;PCLO;PTPRN2;SLC32A1;SYT1;SYT10;SYN3;SYN2	up	GO_Biological_Process_2023
Positive Regulation Of Axonogenesis (GO:0050772)	14093	0.0024350404830297094	0.08630069947208234	0	0	3908392156862740	2351989065230300	TIAM2;SHTN1;CDKL5;SLITRK1;PLXNC1;MAPT;MAP3K13;ROBO1	up	GO_Biological_Process_2023
Neuron Projection Fasciculation (GO:0106030)	45569	0.0025882844386797615	0.08678974815985631	0	0	9752931978107890	5.80959e+16	EPHA4;NRCAM;EPHB2;CDK5R1	up	GO_Biological_Process_2023
Regulation Of Calcium Ion Transmembrane Transport Via High Voltage-Gated Calcium Channel (GO:1902514)	45569	0.0025882844386797615	0.08678974815985631	0	0	9752931978107890	5.80959e+16	SESTD1;CACNA2D1;NOS1AP;NOS1	up	GO_Biological_Process_2023
Regulation Of Presynapse Assembly (GO:1905606)	42491	0.002592888741705251	0.08678974815985631	0	0	6653151230616010	3961940034918060	LRFN5;LRRTM3;SLITRK1;IL1RAPL1;SLITRK3	up	GO_Biological_Process_2023
Regulation Of Presynapse Organization (GO:0099174)	42491	0.002592888741705251	0.08678974815985631	0	0	6653151230616010	3961940034918060	LRFN5;LRRTM3;SLITRK1;IL1RAPL1;SLITRK3	up	GO_Biological_Process_2023
Brain Development (GO:0007420)	21/169	0.0027608495086352707	0.09114585364124661	0	0	2.08779e+16	1.23017e+16	EPHA7;NDRG4;CADM2;FOXG1;AMIGO1;AMIGO2;PBX3;PBX4;GRIN2B;MEIS2;PBX1;AFF2;GRIN2A;MEIS1;NFASC;NRCAM;CTNNA2;DSCAML1;CDK5R2;ADGRL3;CDK5R1	up	GO_Biological_Process_2023
Neuron Projection (GO:0043005)	96/557	0.00341713	0.0768853	0	0	3.20277e+16	1.36183e+16	CYFIP2;GABRB3;CHRM2;SNAP25;ROBO3;GABRB1;CHRM1;TENM3;TENM4;KCNC2;RASGRF1;KNDC1;SLC8A2;ROBO1;SCGN;GRM2;ATCAY;PCLO;GRM7;SACS;NRCAM;KIF1A;EPHB2;VSTM5;EPHB1;RGS9;PRKCG;EPHA4;EPHA7;CXADR;SLC32A1;DSCAM;MAGI2;ANK2;ANK3;GABRG3;CCSAP;SRCIN1;SSTR3;SHTN1;FRMD7;FEZ1;MAP1B;SCN8A;MAP1A;IL1RAPL1;DCX;MAPT;DSCAML1;EPHA3;OPRD1;GRIA2;NLGN1;EPHA10;KCNA1;AMIGO1;CHRNA7;SLC1A1;CAMK2A;ADAM22;KCNA4;ATP1A3;ADCY2;BRINP2;MAP…	up	GO_Cellular_Component_2023
Dendrite (GO:0030425)	53/270	1973.8	222052	0	0	3.67352e+16	1.07464e+16	CHRM2;CHRM1;KCNC2;KNDC1;SLC8A2;SCGN;ATCAY;GRM7;SACS;KIF1A;EPHB2;EPHB1;VSTM5;PRKCG;EPHA4;EPHA7;CDKL5;SLC32A1;DSCAM;MAGI2;ANK3;GABRG3;SRCIN1;MAP1B;MAP1A;IL1RAPL1;MAPT;EPHA3;GRIA2;NLGN1;EPHA10;AMIGO1;KCNA1;SLC1A1;ADCY2;BRINP2;MAP2;PENK;MARK1;GABRA2;HOMER2;GABRA5;KCNB1;GABRA4;KCNB2;KLHL1;SLC4A10;SORBS2;SEPTIN4;MYO1D;NSG2;CDK5R1;HCN1	up	GO_Cellular_Component_2023
Axon (GO:0030424)	41/205	57527.1	4.31453e+06	0	0	3734500805152970	8805491783081890	ROBO3;KCNC2;SLC1A1;ADAM22;KCNA4;ATP1A3;SLC8A2;GRM2;PCLO;ATCAY;GRM7;SACS;NRCAM;KIF1A;CTNNA2;EPHB2;VSTM5;MAP9;EPHA4;SYT4;DSCAM;SYT1;KCNB1;CNTN6;SEPTIN4;CCSAP;SRCIN1;MYO1D;SHTN1;NFASC;TH;FEZ1;MAP1B;SCN8A;MAP1A;MAPT;SCN2A;DSCAML1;ADGRL3;CDK5R1;HCN1	up	GO_Cellular_Component_2023
Glutamatergic Synapse (GO:0098978)	23/78	3.43906e+06	1.93447e+08	0	0	6193737373737370	1.34966e+16	NLGN3;SH3GL3;NLGN1;CDKL5;CTTNBP2;LRRC4;ATP2B2;SPTB;SRCIN1;SHISA7;LRFN5;PCLO;LRRTM3;SLITRK1;SLITRK4;IL1RAPL1;NOS1AP;DLGAP1;NPTXR;DLGAP2;SH3GL2;CACNG5;ADGRL3	up	GO_Cellular_Component_2023
Postsynaptic Specialization Membrane (GO:0099634)	15/38	4.49703e+06	2.02366e+09	0	0	9614936222740360	1.84798e+16	GRIA2;NLGN1;PLPPR4;GRIK2;GRIN2B;GRIN2A;GRM5;DLG2;NETO1;SLITRK3;CACNG2;CACNG3;GRIA3;CACNG5;GRIA4	up	GO_Cellular_Component_2023
Postsynaptic Density (GO:0014069)	31/151	6.4504e+07	2.4189e+09	0	0	3.83724e+16	7236699103105950	GRIA2;NLGN1;PLPPR4;GRIK2;SLC8A2;ADD2;GRIN2A;GRM5;SIPA1L1;NETO1;SRGAP3;NOS1;CACNG2;CACNG3;GRIA3;GRIA4;CACNG5;KCND2;HOMER2;MAGI2;ATP2B2;NETO2;SRCIN1;GRIN2B;SHISA7;DNM3;ARHGEF9;DLG2;DNAJC6;LRRC7;CDK5R1	up	GO_Cellular_Component_2023
Voltage-Gated Potassium Channel Complex (GO:0008076)	20/73	1.95773e+08	6.29271e+08	0	0	5576420322980620	9897529730114710	DPP10;KCNF1;KCNJ6;KCND2;KCNC2;KCNB1;KCNA1;KCNB2;KCNA4;KCNA6;KCNAB3;KCNV1;DPP6;KCNS2;KCNMA1;KCNQ2;KCNQ3;KCNQ5;KCNJ3;HCN1	up	GO_Cellular_Component_2023
Postsynaptic Density Membrane (GO:0098839)	13/34	7.643e+07	2.14959e+09	0	0	9113160854893130	1.49336e+16	GRIA2;PLPPR4;GRIK2;GRIN2B;GRIN2A;GRM5;DLG2;NETO1;CACNG2;CACNG3;GRIA3;CACNG5;GRIA4	up	GO_Cellular_Component_2023
Potassium Channel Complex (GO:0034705)	20/81	1.30589e+08	3.26473e+10	0	0	4843009747803170	7676756301275220	DPP10;KCNF1;KCNJ6;KCND2;KCNC2;KCNB1;KCNA1;KCNB2;KCNA4;GRIK2;KCNA6;KCNAB3;KCNV1;DPP6;KCNS2;KCNMA1;KCNQ2;KCNQ3;KCNQ5;KCNJ3	up	GO_Cellular_Component_2023
Asymmetric Synapse (GO:0032279)	26/133	2.92074e+08	6.57166e+10	0	0	3.5975e+16	5412890210733990	NLGN3;GRIA2;NLGN1;SLC1A1;SLC8A2;ADD2;GRIN2A;SIPA1L1;GRM7;NETO1;SRGAP3;NOS1;CACNG5;KCND2;HOMER2;MAGI2;NETO2;SRCIN1;GRIN2B;SHISA7;DNM3;ARHGEF9;DLG2;DNAJC6;LRRC7;CDK5R1	up	GO_Cellular_Component_2023
Calcium Channel Complex (GO:0034704)	14/59	1.61771e+11	3.30895e+11	0	0	4577672708169160	5050050073912970	TRPC4;CACNA2D1;PDE4D;CACNA1A;CACNA1E;RYR3;CACNA1I;CACNB3;CACNB4;SCN8A;SCN2A;CACNG3;SCN3A;SCN1A	up	GO_Cellular_Component_2023
Ionotropic Glutamate Receptor Complex (GO:0008328)	12328	2.70245e+10	5.06709e+11	0	0	6384780900987050	6716002531329500	GRIA2;GRIN2A;VWC2;GRIK2;CACNG3;GRIN2B;GRIA3;SHISA7;CACNG5;GRIA4	up	GO_Cellular_Component_2023
Voltage-Gated Calcium Channel Complex (GO:0005891)	18233	4.62286e+10	8.00111e+11	0	0	4766623429093920	475800128870321	CACNA1I;CACNB3;CACNB4;CACNA2D1;PDE4D;SCN8A;CACNA1A;SCN2A;CACNA1E;CACNG3;SCN3A;SCN1A	up	GO_Cellular_Component_2023
AMPA Glutamate Receptor Complex (GO:0032281)	43647	1.11716e+12	0.001675739171955116	0	0	8551136363636360	7781150243618160	GRIA2;VWC2;CACNG3;SHISA7;GRIA3;CACNG5;GRIA4	up	GO_Cellular_Component_2023
GABA-ergic Synapse (GO:0098982)	43647	1.11716e+12	0.001675739171955116	0	0	8551136363636360	7781150243618160	NLGN3;NLGN1;LRFN5;PCLO;SLITRK1;SLITRK3;ATP2B2	up	GO_Cellular_Component_2023
Synaptic Vesicle Membrane (GO:0030672)	20059	1.27609e+12	0.0017944949994812187	0	0	4198044284590310	3764194591155710	GABRA2;SYNPR;SYT4;SV2C;PTPRN2;DOC2A;SLC32A1;SYT1;SV2A;ICA1;SYN3;SYN2	up	GO_Cellular_Component_2023
Neuron To Neuron Synapse (GO:0098984)	45570	2.06885e+11	0.00273818424184673	0	0	1.46416e+16	1.2421e+16	GRIA2;NLGN1;GRM7;SLC1A1;ATP1A3	up	GO_Cellular_Component_2023
Dendrite Membrane (GO:0032590)	46966	2.74151e+12	0.0034268838516942368	0	0	5865725490196070	4.81097e+16	GABRA2;KCNC2;GABRA5;KCNB1;GABRA4;ATP2B2;GABRG3;SHISA7	up	GO_Cellular_Component_2023
Exocytic Vesicle Membrane (GO:0099501)	19664	4.54628e+12	0.005157270281035115	0	0	3.84518e+16	2.95926e+16	GABRA2;SYNPR;SYT4;SV2C;PTPRN2;SLC32A1;SYT1;SV2A;ICA1;SYN3;SYN2	up	GO_Cellular_Component_2023
Clathrin-Sculpted Gamma-Aminobutyric Acid Transport Vesicle (GO:0061200)	45477	5.04266e+10	0.005157270281035115	0	0	1.9509e+16	1.4812e+16	SLC32A1;SYT1;GAD1;GAD2	up	GO_Cellular_Component_2023
Clathrin-Sculpted Gamma-Aminobutyric Acid Transport Vesicle Membrane (GO:0061202)	45477	5.04266e+10	0.005157270281035115	0	0	1.9509e+16	1.4812e+16	SLC32A1;SYT1;GAD1;GAD2	up	GO_Cellular_Component_2023
Cytoskeleton Of Presynaptic Active Zone (GO:0048788)	45477	5.04266e+10	0.005157270281035115	0	0	1.9509e+16	1.4812e+16	RIMS2;PCLO;RIMS3;ERC2	up	GO_Cellular_Component_2023
GABA-A Receptor Complex (GO:1902711)	43252	6.54142e+11	0.006399218736659531	0	0	7323805794831630	5.36995e+16	GABRA2;GABRB3;GABRB1;GABRA5;GABRA4;GABRG3	up	GO_Cellular_Component_2023
Apical Dendrite (GO:0097440)	45539	0.0016357219138994376	0.015334892942807227	0	0	1.17041e+16	7508993676190910	MYO1D;MAP2;MAP1B;SLC1A1	up	GO_Cellular_Component_2023
Synaptic Membrane (GO:0097060)	11505	0.0029614450401418673	0.026653005361276808	0	0	4272825235109710	2.48767e+16	NLGN1;GRIN2A;SLITRK3;ATP2B2;TMEM240;GRIN2B;SHISA7	up	GO_Cellular_Component_2023
Inhibitory Synapse (GO:0060077)	45507	0.01155383385087212	0.09998510063254719	0	0	877125	3912624784877290	NLGN3;NLGN1;LHFPL4	up	GO_Cellular_Component_2023
Voltage-Gated Monoatomic Cation Channel Activity (GO:0022843)	24/76	28415.8	1.435e+08	0	0	6842426834484020	1.66162e+16	KCNH3;KCNF1;KCNH5;KCND2;KCNC2;CACNA2D1;KCNA1;CACNA1A;KCNA4;KCNA6;CACNA1E;CACNA1I;KCNV1;CACNB3;CACNB4;KCNS2;KCNMA1;KCNQ2;KCNQ3;KCNQ5;CACNG2;CACNG3;CACNG5;HCN1	up	GO_Molecular_Function_2023
Voltage-Gated Potassium Channel Activity (GO:0005249)	20/80	1.04594e+09	2.641e+11	0	0	4923990498812350	7914418185282510	KCNH3;KCNF1;KCNJ6;KCNH5;KCND2;KCNC2;KCNH7;KCNB1;KCNJ9;KCNA1;KCNB2;KCNA4;KCNA6;KCNV1;KCNS2;KCNMA1;KCNQ2;KCNQ3;KCNQ5;KCNJ3	up	GO_Molecular_Function_2023
Potassium Channel Activity (GO:0005267)	18/79	1.94923e+10	3.2812e+11	0	0	4351817533856020	5.7218e+16	KCNH3;KCNF1;KCNH5;KCNK9;KCND2;KCNK10;KCNC2;KCNA1;KCNA4;GRIK2;KCNA6;KCNV1;KCNS2;KCNMA1;KCNQ2;KCNQ3;KCNQ5;HCN1	up	GO_Molecular_Function_2023
Transmitter-Gated Monoatomic Ion Channel Activity (GO:0022824)	14946	4.79233e+09	5.34441e+11	0	0	6301787119253680	7718740408478650	GABRB3;GABRA2;GRIA2;GABRB1;GRIN2A;GABRA5;GABRA4;GRIK2;GABRG3;GRIN2B;GRIA3;GRIA4	up	GO_Molecular_Function_2023
Voltage-Gated Calcium Channel Activity (GO:0005245)	13/47	5.29149e+09	5.34441e+11	0	0	5624803149606290	6833803950789420	CACNA2D1;CACNA1A;CACNA1E;CACNA1I;CACNB3;CACNB4;SCN8A;CACNG2;SCN2A;CACNG3;SCN3A;CACNG5;SCN1A	up	GO_Molecular_Function_2023
GABA-gated Chloride Ion Channel Activity (GO:0022851)	45632	4.5479e+10	0.003827812280588666	0	0	1.46523e+16	1464976177957390	GABRA2;GABRB3;GABRB1;GABRA5;GABRA4;GABRG3	up	GO_Molecular_Function_2023
High Voltage-Gated Calcium Channel Activity (GO:0008331)	45139	5.76745e+10	0.004160805556303945	0	0	7823058823529410	7635849005090750	CACNA1I;CACNB3;CACNB4;SCN8A;SCN2A;CACNA1E;SCN3A;SCN1A	up	GO_Molecular_Function_2023
Ligand-Gated Monoatomic Anion Channel Activity (GO:0099095)	43282	7.46846e+10	0.004714464494962519	0	0	9329011114277570	8864647301353600	GABRA2;GABRB3;GABRB1;GLRB;GABRA5;GABRA4;GABRG3	up	GO_Molecular_Function_2023
Transmembrane-Ephrin Receptor Activity (GO:0005005)	41791	1.32187e+11	0.007417149515117959	0	0	1.09881e+16	9813757943102610	EPHA4;EPHA7;EPHA10;EPHB2;EPHB1;EPHA3	up	GO_Molecular_Function_2023
Ligand-Gated Monoatomic Ion Channel Activity Involved In Regulation Of Presynaptic Membrane Potential (GO:0099507)	45570	2.06885e+11	0.008940093771161785	0	0	1.46416e+16	1.2421e+16	GABRB1;GABRA5;GRIN2B;GRIA3;GRIA4	up	GO_Molecular_Function_2023
Ephrin Receptor Activity (GO:0005003)	42156	2.08368e+12	0.008940093771161785	0	0	9766640563821450	8278404911025750	EPHA4;EPHA7;EPHA10;EPHB2;EPHB1;EPHA3	up	GO_Molecular_Function_2023
GABA Receptor Activity (GO:0016917)	44378	2.30141e+12	0.008940093771161785	0	0	7.32876e+16	6139170538977500	GABRA2;GABRB3;GABBR2;GABRB1;GABRA5;GABRA4;GABRG3	up	GO_Molecular_Function_2023
Neurotransmitter Receptor Activity Involved In Regulation Of Postsynaptic Membrane Potential (GO:0099529)	44378	2.30141e+12	0.008940093771161785	0	0	7.32876e+16	6139170538977500	GABRA2;GRIA2;GRIN2A;GRIK2;GRIN2B;GRIA3;GRIA4	up	GO_Molecular_Function_2023
Ionotropic Glutamate Receptor Activity (GO:0004970)	42522	3.15338e+12	0.011374698758891896	0	0	8789506656225520	7085981517281150	GRIA2;GRIN2A;GRIK2;GRIN2B;GRIA3;GRIA4	up	GO_Molecular_Function_2023
GABA-A Receptor Activity (GO:0004890)	43252	6.54142e+11	0.022022792778163096	0	0	7323805794831630	5.36995e+16	GABRA2;GABRB3;GABRB1;GABRA5;GABRA4;GABRG3	up	GO_Molecular_Function_2023
Inhibitory Extracellular Ligand-Gated Monoatomic Ion Channel Activity (GO:0005237)	41395	8.98065e+11	0.02686879925649277	0	0	914955007824726	6418654181325900	GABRA2;GLRB;GABRA5;GABRA4;GABRG3	up	GO_Molecular_Function_2023
Voltage-Gated Sodium Channel Activity (GO:0005248)	43617	9.04494e+11	0.02686879925649277	0	0	6.76007e+16	4.73755e+16	SCN8A;SCN2A;SCN3B;NALCN;SCN3A;SCN1A	up	GO_Molecular_Function_2023
Transmitter-Gated Monoatomic Ion Channel Activity Involved In Regulation Of Postsynaptic Membrane Potential (GO:1904315)	12632	0.001135635398853133	0.03186088202337957	0	0	4510648567119150	3.05847e+16	GABRA2;GRIA2;GRIN2A;CHRNA7;GRIK2;GRIN2B;GRIA3;GRIA4	up	GO_Molecular_Function_2023
Amyloid-Beta Binding (GO:0001540)	13/79	0.0014675985676738305	0.039007225088172864	0	0	2.89266e+16	1.88721e+16	EPHA4;GRIA2;NLGN1;CHRNA7;ATP1A3;CACNA1A;GRIN2B;BACE1;GRIN2A;APBB1;EPHB2;GRIA3;GRIA4	up	GO_Molecular_Function_2023
Benzodiazepine Receptor Activity (GO:0008503)	45539	0.0016357219138994376	0.041301978325960796	0	0	1.17041e+16	7508993676190910	GABRA2;GABRA5;GABRA4;GABRG3	up	GO_Molecular_Function_2023
Sodium Channel Activity (GO:0005272)	13728	0.002035022407660726	0.048937443612793646	0	0	4043380662609870	2.50578e+16	SCN8A;GRIK2;ASIC2;SCN2A;NALCN;SCN3A;SCN1A;HCN1	up	GO_Molecular_Function_2023
Extracellular Ligand-Gated Monoatomic Ion Channel Activity (GO:0005230)	45569	0.0025882844386797615	0.05450026498026645	0	0	9752931978107890	5.80959e+16	GABRA2;GABRA5;GABRA4;GABRG3	up	GO_Molecular_Function_2023
Glutamate Receptor Activity (GO:0008066)	42491	0.002592888741705251	0.05450026498026645	0	0	6653151230616010	3961940034918060	GRIA2;GRM2;GRM5;GRM7;GRIA4	up	GO_Molecular_Function_2023
Calcium-Dependent Phospholipid Binding (GO:0005544)	17411	0.0026600134644794667	0.05450026498026645	0	0	3.47251e+16	2.059e+16	SYT4;PCLO;CPNE5;SYT1;CPNE4;PLA2G4E;SYT10;SYT17;SYT6	up	GO_Molecular_Function_2023
Ligand-Gated Monoatomic Ion Channel Activity (GO:0015276)	45078	0.002698032919815171	0.05450026498026645	0	0	5168363351605320	3057206993741360	GABRA2;GABRB1;GABRA5;GRIN2B;GRIA3;GRIA4	up	GO_Molecular_Function_2023
Glutamate Receptor Binding (GO:0035254)	43221	0.004568510713850188	0.08873453501901327	0	0	5628987600818580	3.03322e+16	NETO1;HOMER2;CAMK2A;NETO2;SHISA7	up	GO_Molecular_Function_2023
